# Supplementary material for: The visible and hidden climatic effects on Earth's denudation
Source: Copernicus journal article supplement (doi:10.5194/esd-2024-27), 2024-09-23
Supplement: Supplementary file 1 [file esd-2024-27-supplement.zip]

## Sheet: Table S9
Table S9. Denudation rate and candidate covariates for the complete dataset, indicating wich transformation was made.
Note. Average integration time was calculated using a rock density of 2.5g cm-3, a depth attenuation for neutrons, slow muon and fast muon of 150cm-2, 1,500cm-2 and 5,300cm-2 respectivelly, and a contribution to total cosmogenic production rate for neutrons, slow muon and fast muon of 0.9875, 0.015 and 0.0065 respectivelly (Carretier et al., 2009, Granger and Schaller, 2014).
Basin name	Source	Average integration time (yr)	Name	denudation rate (mm kyr-1)	area	average slope	quantile 85 of slope	quantile 95 of slope	average Normalized Channel Steepness Index for minimum drainage area of 5km2	quantile 85 of Normalized Channel Steepness Index for minimum drainage area of 5km2	quantile 95 of Normalized Channel Steepness Index for minimum drainage area of 5km2	average Normalized Channel Steepness Index for minimum drainage area of 1km2	quantile 85 of Normalized Channel Steepness Index for minimum drainage area of 1km2	quantile 95 of Normalized Channel Steepness Index for minimum drainage area of 1km2	average stream power	quantile 85 of stream power	quantile 95 of stream power	average slope, 15 arc_sec	quantile 85 of slope, 15 arc_sec	quantile 95 of slope, 15 arc_sec	average Rainfall Erosivity using CMORPH product (Bezak et al. 2022)	average 15-year return-period daily precipitation (Beck et al. 2020)	average 15-year return-period 3-hourly precipitation (Beck et al. 2020)	average Aridity index	percentage of forest cover (Bicheron et al. 2011)	percentage of forest cover (Shimada et al. 2014)	average Leaf Area Index	average C-factor	average Normalized Difference Vegetation Index	average soil moisture using terrain parameters, bioclimatic data & soil type classes	average soil moisture using only terrain parameters	average precipitation	average paleo-precipitation	average streamflow	average streamflow of the month with the highest value	average runoff	average runoff of the month with the highest value	first principal component between pPP_ln, NDVI & AI_ln	average Peak Ground Acceleration for return period of 2,475 yr (Pagani et al. 2018)	average Peak Ground Acceleration for return period of 2,475 yr inferred by topography (Pagani et al. 2018)	average Peak Ground Acceleration for return period of 475 yr (Pagani et al. 2018)	average Peak Ground Acceleration for return period of 475 yr inferred by topography (Pagani et al. 2018)	average Peak Ground Acceleration for return period of 475 yr (Giardini et al. 2003)	percentage of hard rocks	average erodibility index	percentage of soft rocks	average Snow Water Equivalent	basal speed	snow cover day
			Abbreviation	den_ln	A_ln	sl	sl_85	sl_95	Ksn_hz_ln	Ksn_hz_85_ln	Ksn_hz_95_ln	Ksn_vz	Ksn_vz_85	Ksn_vz_95	sp_ln	sp_85_ln	sp_95_ln	sl_15s	sl_85_15s	sl_95_15s	ero_CMORPH_ln	int_daily_ln	int_3hourly_ln	AI_ln	forest	forest.1	LAI_ln	C.factor_ln	NDVI	SM_eco_swc_terrain	SM_terrain_ln	PP_ln	pPP_ln	Q_ln	Qmax_ln	runoff_ln	runoff_max_ln	clim	PGA2475_ln	PGA2475_vs30_ln	PGA475_ln	PGA475_vs30_ln	PGA_ln	hard	litho	soft_ln	SWE_ln	speed_ln	SCD_ln
			Transformation	ln	ln (x-100)				ln (x+10)	ln (x+100)	ln (x+100)				ln (x+10)	ln (x+10)	ln (x+10)				ln (x+100)	ln	ln	ln (x+0.1)			ln (x+1)	ln (x+0.01)			ln (0.5-x)	ln (x+100)	ln (x+100)	ln (x+0.01)	ln (x+0.01)	ln (x+100)	ln (x+10)		ln (x+0.1)	ln (x+0.1)	ln (x+0.1)	ln (x+0.1)	ln (x+1)			ln (x+1)	ln (x+10)	ln (x+10,000)	ln (x+100)
S257WTS006	Codilean et al. 2022	238275		1.2296	13.5767	0.03332	0.0519	0.1812	2.7629	4.6937	4.7814	12.7403	21.3085	45.147	2.7999	2.9212	3.4808	0.0209	0.0313	0.0936	6.0868	4.293	3.7264	-1.2661	1.723	0.0911	0.3626	-1.863	0.2336	0.1597	1.0996	6.1867	6.1079	6.092	7.004	4.7683	2.6118	-1.8307	-1.9018	-1.8183	-2.1219	-2.0739	0.179	25.4171	6.915	3.5407	3.3544	9.2103	4.6095
S257WTS008	Codilean et al. 2022	159784		1.6292	13.5767	0.03332	0.0519	0.1812	2.7629	4.6937	4.7814	12.7403	21.3085	45.147	2.7999	2.9212	3.4808	0.0209	0.0313	0.0936	6.0868	4.293	3.7264	-1.2661	1.723	0.0911	0.3626	-1.863	0.2336	0.1597	1.0996	6.1867	6.1079	6.092	7.004	4.7683	2.6118	-1.8307	-1.9018	-1.8183	-2.1219	-2.0739	0.179	25.4171	6.915	3.5407	3.3544	9.2103	4.6095
S257WTS007	Codilean et al. 2022	210568		1.3533	13.5767	0.03332	0.0519	0.1812	2.7629	4.6937	4.7814	12.7403	21.3085	45.147	2.7999	2.9212	3.4808	0.0209	0.0313	0.0936	6.0868	4.293	3.7264	-1.2661	1.723	0.0911	0.3626	-1.863	0.2336	0.1597	1.0996	6.1867	6.1079	6.092	7.004	4.7683	2.6118	-1.8307	-1.9018	-1.8183	-2.1219	-2.0739	0.179	25.4171	6.915	3.5407	3.3544	9.2103	4.6095
S257WTS005	Codilean et al. 2022	186476		1.4748	12.9717	0.04843	0.0856	0.2651	2.8795	4.7123	4.8467	14.2034	25.4198	49.464	2.9691	3.0774	3.923	0.031	0.0497	0.1373	6.1504	4.2961	3.7147	-1.0899	2.951	0.0942	0.3992	-2.0219	0.2548	0.178	1.1423	6.3323	6.2257	5.7448	6.6127	4.8116	2.6732	-1.5401	-1.7424	-1.6461	-2.0349	-1.9733	0.2458	29.8931	5.104	2.2724	3.3544	9.2103	4.6129
S257WTS004	Codilean et al. 2022	291036		1.0296	12.9677	0.04855	0.0859	0.2657	2.8779	4.7123	4.8468	14.1839	25.4601	49.488	2.9612	3.0766	3.9229	0.031	0.0498	0.1377	6.1522	4.2966	3.7153	-1.0879	2.963	0.0939	0.3998	-2.031	0.2553	0.1782	1.1426	6.3343	6.228	5.7431	6.612	4.812	2.6742	-1.5353	-1.7435	-1.6471	-2.0349	-1.974	0.2451	29.7903	5.099	2.2577	3.3544	9.2103	4.6129
S257WTS003	Codilean et al. 2022	152889		1.6734	12.7584	0.05337	0.1003	0.2969	2.9063	4.7188	4.8808	15.2026	28.7013	52.4795	3.0218	3.1815	4.0548	0.0342	0.0575	0.1542	6.2404	4.3313	3.7523	-0.9862	3.252	0.1162	0.4481	-2.1062	0.2829	0.1862	1.1565	6.4395	6.3373	5.7276	6.5903	4.8512	2.7362	-1.2921	-1.7545	-1.6665	-2.0356	-1.9783	0.2232	30.2278	5.202	2.3404	3.3544	9.2103	4.6148
S257WTS002	Codilean et al. 2022	120192		1.914	12.7283	0.05431	0.1035	0.3015	2.9101	4.7202	4.8842	15.3678	29.1749	52.8153	3.0249	3.1882	4.0581	0.0348	0.0592	0.1568	6.2532	4.335	3.7562	-0.9709	3.343	0.1195	0.4537	-2.1111	0.286	0.1878	1.1587	6.4541	6.3528	5.7188	6.5511	4.8559	2.733	-1.2591	-1.7499	-1.6623	-2.0326	-1.9754	0.2229	29.5048	5.162	2.2384	3.3544	9.2103	4.6151
S045WTS001	Codilean et al. 2022	2763.12		5.6867	12.3916	0.357	0.6287	0.7667	4.1361	5.2658	5.4644	65.518	105.584	145.631	5.1741	5.5815	6.1777	0.2255	0.4028	0.5436	6.5078	4.0998	3.4656	-0.7478	7.899	11.993	0.3443	-1.6923	0.1669	0.266	1.4238	6.1929	6.5871	7.9317	8.7218	6.1415	4.331	-1.1985	-0.8435	-0.2891	-1.2819	-0.9007	1.4505	41.1676	5.94	2.358	4.5272	11.2662	5.7977
S045WTS012	Codilean et al. 2022	6691.57		4.8022	12.2478	0.3252	0.5952	0.7195	4.0102	5.1982	5.3626	56.9874	92.3418	124.857	4.7171	5.2294	5.839	0.204	0.3604	0.4798	6.4917	4.0676	3.454	-0.8905	6.07	9.3145	0.3081	-1.6215	0.1606	0.2647	1.4196	6.0873	6.5517	7.4161	8.3525	5.8622	4.1382	-1.3541	-0.8635	-0.3129	-1.3012	-0.9175	1.4809	40.2529	5.996	2.4688	4.1656	10.3092	5.7846
S137WTS001	Codilean et al. 2022	7200.04		4.729	11.2947	0.19333	0.4315	0.6658	3.6448	5.0704	5.3597	43.6644	86.1944	128.91	4.4024	4.9794	5.7585	0.1285	0.3007	0.4877	6.9064	4.4502	3.6541	0.162	26.473	45.5092	1.0728	-2.2036	0.5201	0.2736	1.3744	7.0542	7.0566	7.3293	7.5922	6.5476	4.3019	0.8184	-1.1372	-1.0765	-1.6256	-1.5799	0.626	15.2683	9.243	4.0534	6.1063	10.2723	5.0605
S153WTS001	Codilean et al. 2022	44652.1		2.9042	11.6629	0.02141	0.0421	0.0673	2.6402	4.668	4.6966	5.7138	7.8978	11.46	2.6844	2.8601	3.1143	0.0111	0.0187	0.0287	7.1729	4.8328	4.3124	-0.7862	9.181	9.3481	0.6555	-2.1751	0.39	0.2019	1.2816	6.6878	6.5729	5.4593	5.9416	5.0984	2.9168	-0.6584	-2.0395	-1.9449	-2.1955	-2.1533	0.1214	0	9.337	4.0376	2.3026	9.2103	4.6052
S071WTS006	Codilean et al. 2022	5992.79		4.9125	11.6346	0.37064	0.6524	0.7842	4.1927	5.3624	5.5981	71.3109	112.242	157.795	5.4097	5.8244	6.3866	0.2265	0.4144	0.5457	6.2969	4.1518	3.4793	-0.286	11.302	12.8357	0.4767	-1.8826	0.2238	0.2638	1.4355	6.5821	6.6652	7.2627	8.0818	6.2108	4.433	-0.6312	-0.8756	-0.3876	-1.3112	-0.9891	1.0087	25.3573	6.555	2.2303	4.7862	10.4229	5.8499
S071WTS005	Codilean et al. 2022	8098.79		4.6114	11.617	0.36684	0.648	0.7791	4.175	5.3462	5.5908	70.3973	110.797	156.385	5.3902	5.7801	6.3748	0.2241	0.4103	0.5422	6.2925	4.1325	3.462	-0.2947	10.448	11.9723	0.4582	-1.8734	0.2177	0.2636	1.4355	6.5677	6.6535	7.2251	8.0555	6.1949	4.4253	-0.6638	-0.8804	-0.3883	-1.3145	-0.9889	1.0023	24.7706	6.563	2.1921	4.7867	10.4353	5.8607
S071WTS003	Codilean et al. 2022	10601		4.3421	11.598	0.36206	0.6426	0.7727	4.1536	5.324	5.5796	69.3511	108.848	154.597	5.3703	5.7107	6.3631	0.2211	0.4043	0.5373	6.2877	4.1116	3.4447	-0.3044	9.342	11.0581	0.4366	-1.8611	0.2112	0.2634	1.4355	6.5535	6.6384	7.1568	8.017	6.1558	4.4082	-0.7011	-0.887	-0.3871	-1.319	-0.9883	0.9976	23.3991	6.626	2.2053	4.7832	10.4487	5.8707
S071WTS004	Codilean et al. 2022	11793.1		4.2356	11.598	0.36206	0.6426	0.7727	4.1536	5.324	5.5796	69.3511	108.848	154.597	5.3703	5.7107	6.3631	0.2211	0.4043	0.5373	6.2877	4.1116	3.4447	-0.3044	9.342	11.0581	0.4366	-1.8611	0.2112	0.2634	1.4355	6.5535	6.6384	7.1568	8.017	6.1558	4.4082	-0.7011	-0.887	-0.3871	-1.319	-0.9883	0.9976	23.3991	6.626	2.2053	4.7832	10.4487	5.8707
S153WTS002	Codilean et al. 2022	48942.9		2.8124	11.5824	0.02353	0.0452	0.0737	2.6832	4.6766	4.7126	6.4364	9.4116	13.0178	2.702	2.8867	3.1864	0.0121	0.0211	0.0321	6.939	4.7583	4.2728	-0.9825	8.802	8.3482	0.5706	-2.1991	0.3393	0.1984	1.2167	6.5251	6.406	5.1435	5.6052	5.0132	2.8074	-1.0833	-2.0448	-1.9484	-2.2109	-2.1733	0.1235	3.0489	10.566	4.3744	2.3026	9.2103	4.6052
S071WTS001	Codilean et al. 2022	8460.34		4.5677	11.5896	0.35996	0.6401	0.7698	4.1449	5.3144	5.5736	68.8641	107.978	153.69	5.3594	5.6775	6.3457	0.2198	0.4015	0.5349	6.2877	4.1017	3.4367	-0.3085	8.847	10.6258	0.4211	-1.856	0.2083	0.2633	1.4355	6.548	6.6305	7.1139	7.9945	6.1287	4.3958	-0.7185	-0.8906	-0.3863	-1.3213	-0.9875	0.997	22.8594	6.653	2.2128	4.7791	10.4547	5.8747
S153WTS003	Codilean et al. 2022	42889.5		2.9444	11.5731	0.02358	0.0453	0.0739	2.6844	4.6768	4.7127	6.4483	9.4305	13.0347	2.6999	2.8861	3.184	0.0122	0.0212	0.0321	6.9291	4.7539	4.2698	-0.9906	8.725	8.1423	0.5667	-2.1991	0.3374	0.1981	1.2157	6.5191	6.3999	5.0899	5.5605	4.9986	2.7935	-1.0997	-2.0441	-1.9484	-2.2109	-2.1733	0.1235	3.0773	10.564	4.3747	2.3026	9.2103	4.6052
S071WTS048	Codilean et al. 2022	10172.3		4.3834	11.5737	0.35572	0.635	0.763	4.1303	5.2983	5.5656	67.959	106.188	151.677	5.3339	5.63	6.3154	0.2171	0.3958	0.5282	6.2886	4.0825	3.4211	-0.316	8.031	9.8695	0.4085	-1.8464	0.2038	0.2632	1.4355	6.5393	6.6165	7.0499	7.9574	6.0913	4.3772	-0.748	-0.8962	-0.3846	-1.3243	-0.9862	0.9969	21.9644	6.697	2.2269	4.767	10.466	5.8805
S071WTS007	Codilean et al. 2022	5987.51		4.9134	11.4176	0.37595	0.615	0.7386	4.1469	5.2882	5.5262	64.982	96.2414	137.646	5.0642	5.4555	6.0876	0.2222	0.3639	0.4848	6.284	4.144	3.4905	-0.3072	16.25	18.2572	0.5933	-1.9922	0.2954	0.272	1.4494	6.5912	6.6268	6.7963	7.6703	6.0166	4.2634	-0.4936	-0.9352	-0.6854	-1.3634	-1.2232	0.9436	11.5157	7.583	2.9186	4.3997	9.4819	5.745
S071WTS040	Codilean et al. 2022	14889.5		4.0024	11.3713	0.32774	0.6037	0.7273	3.9806	5.1994	5.4272	59.6651	94.2378	131.793	5.101	5.3812	5.9875	0.198	0.3628	0.477	6.4039	4.0384	3.3972	-0.3471	4.941	6.8087	0.3806	-1.8109	0.1986	0.2598	1.4292	6.5133	6.6362	6.7914	7.8508	6.048	4.4612	-0.7683	-0.9012	-0.3528	-1.3269	-0.9569	0.9976	19.1561	6.796	2.1434	4.7924	10.4637	5.9052
S258WTS004	Codilean et al. 2022	6337.2		4.8566	11.6752	0.24077	0.465	0.6251	4.0328	5.2426	5.4102	51.8238	85.0474	119.432	4.9903	5.6376	6.0394	0.144	0.2753	0.372	8.0209	4.844	4.3838	0.3978	57.321	53.1053	1.3672	-2.4259	0.5641	0.2696	1.344	7.6332	7.6838	8.2325	8.6061	7.0106	4.8701	1.6508	-0.4902	-0.4038	-0.9692	-0.8797	1.334	32.5982	6.152	3.0124	7.0479	9.2387	4.6054
S071WTS047	Codilean et al. 2022	7542.58		4.6825	11.3048	0.36776	0.6076	0.73	4.0976	5.2415	5.5138	62.5262	91.9011	133.518	5.0037	5.2689	6.0434	0.2165	0.354	0.4762	6.2494	4.0719	3.4359	-0.3361	11.951	12.052	0.522	-1.9421	0.269	0.2709	1.4602	6.5347	6.5684	6.4722	7.4871	5.8609	4.2031	-0.6346	-0.9465	-0.706	-1.3752	-1.2403	0.9011	10.9234	7.715	3.0001	4.3862	9.5098	5.8107
S143WTS035	Codilean et al. 2022	2472.69		5.7978	10.9251	0.24619	0.5906	0.7848	3.8057	5.2241	5.4302	62.6451	113.551	151.796	4.7735	5.4983	6.0474	0.174	0.4177	0.5655	7.5549	4.7486	3.9461	0.1066	30.761	43.4892	0.9676	-2.2567	0.4455	0.2806	1.3724	6.9982	7.032	7.2926	7.7626	6.8385	4.7832	0.5606	-0.954	-0.8233	-1.4486	-1.3429	0.7713	32.4042	8.83	4.1583	5.8018	9.7219	5.1698
S071WTS046	Codilean et al. 2022	6288.78		4.8643	11.2968	0.3665	0.606	0.7284	4.0913	5.234	5.5127	62.2309	91.2276	132.912	4.9932	5.2386	6.0413	0.2156	0.3521	0.4742	6.2507	4.0635	3.4295	-0.3387	11.505	11.5336	0.5129	-1.9379	0.267	0.2709	1.4606	6.5308	6.5634	6.4258	7.4719	5.8337	4.1971	-0.6461	-0.9488	-0.7068	-1.3767	-1.2413	0.8987	10.8808	7.72	3.0077	4.3797	9.5119	5.814
S026WTS004	Codilean et al. 2022	23243		3.5571	11.0393	0.10425	0.2303	0.3537	3.0505	4.7828	4.8414	18.758	30.2118	42.9319	3.7986	4.1932	4.4676	0.0695	0.1222	0.1843	7.1839	4.6219	3.9952	0.0647	86.279	69.3779	1.1529	-3.5649	0.56	0.29	1.4925	7.0193	7.0559	6.9395	8.0664	6.4334	4.9585	0.8477	-1.9139	-1.9065	-2.1371	-2.1337	0.2382	1.8127	6.199	1.8635	4.9138	9.2103	5.4249
S071WTS045	Codilean et al. 2022	6515.03		4.829	11.2789	0.36305	0.6011	0.7224	4.0677	5.2121	5.4881	61.2444	89.3214	129.543	4.9441	5.1682	5.9079	0.2132	0.347	0.4659	6.2538	4.0514	3.4211	-0.3441	10.601	10.3745	0.4974	-1.9276	0.2633	0.2709	1.4623	6.5241	6.5536	6.3523	7.4307	5.7946	4.1773	-0.6682	-0.9511	-0.7068	-1.3791	-1.2424	0.8951	10.4322	7.754	3.0247	4.3595	9.5166	5.8193
S071WTS033	Codilean et al. 2022	7292.17		4.7163	11.203	0.34895	0.5816	0.6985	3.955	5.1428	5.3393	56.2154	81.9055	112.676	4.6994	4.9523	5.4469	0.2026	0.3274	0.4262	6.2809	4.0323	3.4122	-0.3544	8.044	7.6473	0.4708	-1.8985	0.2582	0.2703	1.4645	6.5148	6.5626	6.2996	7.3966	5.8107	4.2126	-0.6817	-0.9626	-0.7123	-1.3899	-1.2472	0.883	7.2531	7.988	3.0938	4.3555	9.229	5.8328
S074WTS012	Codilean et al. 2022	7909.35		4.635	11.5139	0.0862	0.1459	0.4551	3.1423	4.8228	5.1949	34.7803	78.1581	116.931	3.9851	4.4668	5.4739	0.0427	0.0703	0.2615	8.7408	5.1027	4.6143	1.0351	89.942	95.4468	1.6042	-2.7272	0.653	0.3167	1.5413	8.0855	8.1034	8.8584	9.0978	7.7472	5.4855	2.7282	-0.8187	-0.7121	-1.2852	-1.1858	0.8995	7.6737	8.716	3.4455	6.9689	9.2853	4.6061
S136WTS001	Codilean et al. 2022	32687.5		3.2161	10.643	0.07146	0.1404	0.2194	2.9438	4.7489	4.8185	13.4324	21.0761	31.4127	3.3944	3.7664	4.1483	0.0427	0.0739	0.1179	6.5037	4.3172	3.576	-0.1152	38.782	39.2263	0.945	-2.3279	0.5212	0.2644	1.3919	6.621	6.6283	5.5556	6.3466	5.6848	3.8114	0.2427	-1.9072	-1.8592	-2.1203	-2.0964	0.312	49.023	6.196	3.4556	4.383	9.2103	5.3482
S074WTS011	Codilean et al. 2022	2223.47		5.904	11.4029	0.0936	0.1708	0.4813	3.1976	4.8716	5.2208	35.6847	79.2861	117.718	4.0541	4.5932	5.5292	0.0469	0.0887	0.2774	8.712	5.1044	4.6087	1.0346	89.046	95.1047	1.5955	-2.7136	0.6484	0.3149	1.5316	8.0836	8.1079	8.7666	9.0127	7.7655	5.5102	2.7197	-0.7548	-0.6522	-1.2289	-1.1304	0.9221	8.5739	8.506	3.4633	6.9689	9.2937	4.6062
S009WTS039	Codilean et al. 2022	22896.9		3.5721	10.6517	0.0659	0.164	0.2664	3.0623	4.8147	4.9102	17.2529	29.0551	43.7223	3.542	4.1315	4.4575	0.0444	0.0878	0.1403	6.5106	4.3295	3.6113	-0.124	22.454	35.8585	1.1312	-2.2462	0.6018	0.2706	1.3712	6.7752	6.8426	5.9491	6.4	5.9548	3.8464	0.6299	-1.3756	-1.3179	-1.8288	-1.788	0.4529	43.3366	6.696	3.5555	4.6385	9.2103	4.6668
S009WTS038	Codilean et al. 2022	23065.4		3.5647	10.6517	0.0659	0.164	0.2664	3.0623	4.8147	4.9102	17.2529	29.0551	43.7223	3.542	4.1315	4.4575	0.0444	0.0878	0.1403	6.5106	4.3295	3.6113	-0.124	22.454	35.8585	1.1312	-2.2462	0.6018	0.2706	1.3712	6.7752	6.8426	5.9491	6.4	5.9548	3.8464	0.6299	-1.3756	-1.3179	-1.8288	-1.788	0.4529	43.3366	6.696	3.5555	4.6385	9.2103	4.6668
S143WTS034	Codilean et al. 2022	3324.36		5.5018	10.6662	0.24065	0.5833	0.7819	3.7694	5.2083	5.4156	60.9009	112.484	150.628	4.7214	5.4446	5.9811	0.1683	0.4092	0.56	7.5163	4.7772	3.9595	0.0974	29.363	43.7667	0.948	-2.2462	0.4405	0.2808	1.37	6.9982	7.0084	7.0451	7.5408	6.8483	4.8169	0.5203	-0.9999	-0.8713	-1.4917	-1.3899	0.7377	35.0005	8.636	4.122	5.8736	9.7365	5.1641
S074WTS009	Codilean et al. 2022	2429.49		5.8154	11.3542	0.0971	0.183	0.4924	3.2225	4.8903	5.2313	36.0203	79.7252	118.134	4.0849	4.6632	5.5489	0.0489	0.0972	0.2845	8.6975	5.1056	4.6066	1.0319	88.661	94.9759	1.5905	-2.7061	0.6461	0.314	1.5279	8.0802	8.1091	8.7199	8.976	7.7673	5.5216	2.7127	-0.7255	-0.6234	-1.2033	-1.1047	0.9333	9.0008	8.392	3.4486	6.9689	9.2977	4.6062
S120WTS015	Codilean et al. 2022	80206.7		2.3185	11.2781	0.05563	0.1005	0.1458	2.7546	4.6886	4.7459	8.9967	13.4794	23.8581	3.4013	3.6511	4.2789	0.0229	0.035	0.0575	7.8098	4.8189	4.5354	0.1145	71.321	91.5685	1.3324	-2.6255	0.6026	0.2461	1.1917	7.4116	7.3942	6.9429	7.6918	6.24	4.4032	1.2868	-2.0456	-1.9812	-2.1982	-2.1681	0.4069	96.7556	2.164	0	2.3026	9.2103	4.6052
S074WTS008	Codilean et al. 2022	4177.69		5.2733	11.2826	0.102	0.202	0.5082	3.2578	4.9186	5.2435	36.7372	80.5396	118.864	4.1291	4.7399	5.5851	0.0518	0.1098	0.2942	8.6599	5.1085	4.6026	1.0331	87.986	94.7006	1.5836	-2.6971	0.6426	0.3129	1.5237	8.0796	8.1102	8.6488	8.9182	7.7678	5.5348	2.7054	-0.6794	-0.5791	-1.1628	-1.0642	0.9541	9.6684	8.177	3.3651	6.9689	9.3039	4.6063
S257WTS014	Codilean et al. 2022	259522		1.1442	11.0639	0.03551	0.063	0.158	2.882	4.7264	4.8067	11.3979	17.326	30.7595	2.7892	3.0258	3.3456	0.0211	0.0332	0.0694	5.7178	4.1445	3.579	-1.7799	0.018	0.0227	0.1871	-1.8061	0.1441	0.1337	1.085	5.6129	5.6626	2.7546	3.8487	4.6798	2.4767	-2.8376	-1.8812	-1.791	-2.1236	-2.0778	0.0864	16.1821	6.577	1.4725	2.3026	9.2103	4.6052
S009WTS040	Codilean et al. 2022	28138.8		3.3659	10.5305	0.01896	0.1758	0.2774	3.1173	4.826	4.9209	17.5408	29.3108	44.0579	3.6064	4.1921	4.4987	0.0491	0.0939	0.1459	6.5274	4.3422	3.624	-0.1051	20.981	34.9925	1.1495	-2.2415	0.6109	0.2721	1.3724	6.7927	6.8681	5.8609	6.2808	5.979	3.8477	0.6899	-1.3239	-1.274	-1.7982	-1.762	0.466	48.9214	6.223	3.4224	4.6385	9.2103	4.6747
S143WTS032	Codilean et al. 2022	3502.99		5.4494	10.5559	0.25508	0.6039	0.7986	3.8212	5.2372	5.4302	63.492	115.444	153.63	4.7891	5.5238	6.0319	0.179	0.4261	0.572	7.4719	4.7872	3.9651	0.0937	29.324	44.5718	0.9501	-2.2321	0.4344	0.2801	1.3708	6.9905	7.0087	6.9536	7.5081	6.8649	4.8881	0.5019	-1.0158	-0.8933	-1.5051	-1.4089	0.7327	38.8871	8.269	4.0507	5.8825	9.783	5.21
S143WTS033	Codilean et al. 2022	3281.78		5.5147	10.5559	0.25508	0.6039	0.7986	3.8212	5.2372	5.4302	63.492	115.444	153.63	4.7891	5.5238	6.0319	0.179	0.4261	0.572	7.4719	4.7872	3.9651	0.0937	29.324	44.5718	0.9501	-2.2321	0.4344	0.2801	1.3708	6.9905	7.0087	6.9536	7.5081	6.8649	4.8881	0.5019	-1.0158	-0.8933	-1.5051	-1.4089	0.7327	38.8871	8.269	4.0507	5.8825	9.783	5.21
S071WTS024	Codilean et al. 2022	8076.31		4.6141	10.9067	0.33189	0.56	0.6733	3.8288	5.0769	5.2076	50.8334	75.4939	96.8981	4.4774	4.7719	5.194	0.191	0.3107	0.392	6.3561	3.9976	3.377	-0.3505	5.863	5.7289	0.475	-1.8965	0.2574	0.2676	1.4632	6.5051	6.5729	6.0399	7.1834	5.8362	4.2835	-0.6719	-0.9916	-0.7974	-1.4085	-1.2819	0.8969	3.8918	8.39	3.2528	4.4307	9.2299	5.8584
S025WTS056	Codilean et al. 2022	1591.88		6.2381	11.1681	0.37717	0.6243	0.7788	4.3973	5.4234	5.6106	75.2455	117.061	162.252	5.0617	5.5739	6.0125	0.2327	0.4004	0.5101	7.596	4.8474	4.3219	-0.0217	59.769	64.6015	1.3638	-2.4214	0.5532	0.2598	1.356	7.2418	7.281	6.5882	7.5875	6.0478	4.408	0.9571	-0.9175	-0.9103	-1.3661	-1.3571	1.1383	2.6024	7.323	1.2061	5.5255	9.5631	4.6386
S111WTS005	Codilean et al. 2022	811.096		6.9124	10.9745	0.3811	0.6383	0.8099	4.4107	5.4155	5.636	76.9734	120.575	164.841	5.7628	6.2702	6.7838	0.2497	0.4357	0.5635	6.3253	4.8349	4.0802	-0.2669	16.972	28.6643	0.6521	-1.5325	0.2648	0.2629	1.4045	6.8539	7.422	7.4182	8.5348	6.907	5.4621	0.1393	-0.3471	-0.2152	-0.8843	-0.7833	1.4815	52.1755	5.559	3.0176	5.7023	11.0261	5.5997
S164WTS079	Codilean et al. 2022	59525.2		2.6167	11.1443	0.07154	0.1513	0.3754	3.0766	4.7603	4.978	21.1997	41.5908	77.3935	3.6249	3.8263	4.7016	0.0431	0.0751	0.2116	7.6511	4.7359	4.3556	-0.4783	15.243	19.3962	0.9481	-2.0826	0.462	0.2375	1.2755	6.9855	7.011	5.753	6.9296	5.4953	3.8762	0.1398	-1.2976	-1.2	-1.7597	-1.6804	0.1583	98.4592	2.122	0.7723	2.3026	9.2103	4.6052
S010WTS032	Codilean et al. 2022	7681.94		4.6642	10.4538	0.32007	0.5528	0.667	4.0885	5.2002	5.3655	56.7707	86.1573	116.833	4.7795	5.2895	5.7142	0.206	0.3465	0.4377	5.7105	3.9056	3.1813	-0.6741	29.268	58.1641	0.6778	-2.2229	0.3118	0.1818	1.1489	6.3391	6.3798	5.7917	6.8369	5.9845	4.375	-0.9424	-0.9411	-0.8894	-1.4997	-1.4537	0.9147	80.5368	4.227	2.7529	5.3581	9.2103	5.7668
S009WTS041	Codilean et al. 2022	27190.5		3.4002	10.3978	0.03499	0.1883	0.2892	3.1721	4.838	4.9321	18.2581	30.0653	44.8463	3.6641	4.2587	4.5097	0.0539	0.1005	0.1516	6.5344	4.3546	3.6394	-0.0954	21.817	35.1552	1.1686	-2.2634	0.6195	0.2738	1.3732	6.8052	6.8862	5.7459	6.1405	5.992	3.8414	0.7352	-1.2758	-1.2331	-1.7661	-1.7339	0.4811	55.857	5.589	3.1881	4.6385	9.2103	4.6844
S136WTS003	Codilean et al. 2022	32070.1		3.2351	10.2399	0.07534	0.143	0.2144	2.9646	4.7508	4.8143	13.4277	20.6038	29.7453	3.4152	3.7599	4.1886	0.0448	0.0758	0.1155	6.581	4.3347	3.5841	-0.0403	43.06	42.1494	1.0003	-2.398	0.5298	0.2662	1.3976	6.6882	6.6126	5.0526	5.8499	5.6192	3.7383	0.3087	-1.9221	-1.876	-2.1186	-2.0948	0.281	63.9659	4.544	2.6729	4.3205	9.2103	5.3517
S127WTS050	Codilean et al. 2022	7971.24		4.6272	10.9898	0.27214	0.4984	0.6407	3.9964	5.1508	5.2978	51.355	78.7967	105.424	4.401	4.8868	5.2944	0.1684	0.2896	0.3723	6.6346	4.4877	4.0484	-0.7534	24.808	23.2051	0.8749	-2.2073	0.3963	0.2315	1.3209	6.5845	6.5566	4.8034	5.9447	5.1048	3.2834	-0.6309	-0.6802	-0.6371	-1.2462	-1.2023	1.1064	2.8011	7.276	0.121	2.7109	9.2103	4.6053
S136WTS004	Codilean et al. 2022	34974.2		3.1485	10.2126	0.0761	0.1441	0.2156	2.9696	4.7521	4.8165	13.5143	20.7258	29.894	3.4235	3.7637	4.1933	0.0453	0.0765	0.1162	6.5888	4.336	3.5855	-0.0331	43.974	42.9171	1.0033	-2.4135	0.5322	0.2666	1.3996	6.694	6.6195	5.0393	5.8499	5.6281	3.7592	0.3264	-1.9207	-1.8747	-2.1178	-2.0939	0.281	65.7199	4.39	2.5946	4.3349	9.2103	5.356
S009WTS037	Codilean et al. 2022	14028.2		4.062	10.1307	0.03896	0.1251	0.2033	2.8338	4.7312	4.7926	11.9173	18.7538	27.1611	3.305	3.7296	4.0614	0.0355	0.0633	0.0957	6.7715	4.2036	3.4284	0.1494	38.139	44.2232	1.1446	-2.435	0.5915	0.2731	1.4234	6.8859	6.9099	5.7663	6.2869	6.2144	4.1786	0.8691	-1.269	-1.1881	-1.7027	-1.6368	0.5063	2.2249	9.36	4.1524	4.3023	9.2103	4.6299
S009WTS036	Codilean et al. 2022	18516.2		3.7844	10.1307	0.03896	0.1251	0.2033	2.8338	4.7312	4.7926	11.9173	18.7538	27.1611	3.305	3.7296	4.0614	0.0355	0.0633	0.0957	6.7715	4.2036	3.4284	0.1494	38.139	44.2232	1.1446	-2.435	0.5915	0.2731	1.4234	6.8859	6.9099	5.7663	6.2869	6.2144	4.1786	0.8691	-1.269	-1.1881	-1.7027	-1.6368	0.5063	2.2249	9.36	4.1524	4.3023	9.2103	4.6299
S009WTS035	Codilean et al. 2022	27382.4		3.3932	10.1184	0.03796	0.1259	0.2042	2.8382	4.732	4.7933	11.9359	18.7638	27.1714	3.3068	3.7318	4.0601	0.0359	0.0636	0.096	6.7704	4.2047	3.4293	0.1514	38.199	44.2703	1.1446	-2.435	0.5924	0.2732	1.4238	6.8878	6.9123	5.7433	6.2589	6.2058	4.1654	0.8751	-1.2705	-1.1914	-1.7032	-1.6389	0.5068	2.2523	9.328	4.1451	4.3023	9.2103	4.6302
S258WTS001	Codilean et al. 2022	5002.15		5.0932	10.9406	0.26168	0.4944	0.6459	4.1205	5.2527	5.41	53.6336	85.968	120.132	5.0938	5.6869	6.0604	0.1567	0.2841	0.3763	7.63	4.7633	4.2688	0.3397	47.132	49.2812	1.2169	-2.3096	0.5283	0.2595	1.3164	7.5052	7.5384	7.4205	7.7801	6.9396	4.7851	1.3885	-0.4963	-0.4475	-1.0317	-0.9763	1.3666	39.736	5.819	3.0177	7.3102	9.2686	4.6054
S143WTS028	Codilean et al. 2022	4029.97		5.3093	10.1935	0.24561	0.5736	0.7639	3.808	5.2248	5.4201	59.3523	109.123	146.714	4.6706	5.3528	5.8567	0.17	0.3999	0.5407	7.3956	4.7393	3.9324	0.0126	29.45	44.0346	0.9413	-2.1991	0.4356	0.2762	1.3563	6.9303	6.8731	6.4095	6.9749	6.7028	4.7302	0.3269	-0.9642	-0.8414	-1.4589	-1.3626	0.7579	38.191	8.436	4.0621	5.8428	9.9099	5.2063
S143WTS029	Codilean et al. 2022	4140.54		5.2822	10.1935	0.24561	0.5736	0.7639	3.808	5.2248	5.4201	59.3523	109.123	146.714	4.6706	5.3528	5.8567	0.17	0.3999	0.5407	7.3956	4.7393	3.9324	0.0126	29.45	44.0346	0.9413	-2.1991	0.4356	0.2762	1.3563	6.9303	6.8731	6.4095	6.9749	6.7028	4.7302	0.3269	-0.9642	-0.8414	-1.4589	-1.3626	0.7579	38.191	8.436	4.0621	5.8428	9.9099	5.2063
S026WTS018	Codilean et al. 2022	45961.6		2.8753	10.2732	0.11377	0.1979	0.2851	3.0403	4.7687	4.8147	17.156	26.1582	35.9559	3.7452	4.0713	4.29	0.0659	0.1098	0.1533	7.1812	4.629	3.9737	0.0853	89.196	64.4005	1.1377	-3.677	0.5609	0.2921	1.5019	7.0052	7.034	6.1656	7.2245	6.4252	4.8864	0.8469	-1.8747	-1.8734	-2.1169	-2.1153	0.2601	0	5.58	0.6441	5.0171	9.2103	5.4705
S235WTS002	Codilean et al. 2022	7280.44		4.7179	10.5956	0.14399	0.3398	0.5172	3.4818	4.9437	5.09	30.6704	54.3256	80.2514	3.7577	4.2193	4.705	0.0958	0.1963	0.3014	6.6854	4.5915	3.944	-1.588	0	0.8484	0.189	-0.9296	0.1357	0.1724	1.2479	5.868	6.117	4.784	6.1253	5.2688	3.6785	-2.3235	-0.3832	-0.2746	-0.8945	-0.7772	1.5034	0.1461	10.991	4.3654	4.9487	9.2103	4.6213
S071WTS022	Codilean et al. 2022	7642.31		4.6694	10.5084	0.32658	0.5544	0.6698	3.7939	5.0559	5.1828	49.8527	74.2906	95.7586	4.4633	4.7386	5.0834	0.1878	0.3083	0.3884	6.3519	3.9885	3.3695	-0.3691	5.444	5.0468	0.4821	-1.9296	0.2632	0.2686	1.4688	6.4878	6.5371	5.6894	6.8573	5.8696	4.3452	-0.7017	-1.0278	-0.8212	-1.4292	-1.2924	0.9073	3.3871	8.275	3.2059	4.3934	9.2103	5.8573
S071WTS023	Codilean et al. 2022	8816.4		4.5265	10.5084	0.32658	0.5544	0.6698	3.7939	5.0559	5.1828	49.8527	74.2906	95.7586	4.4633	4.7386	5.0834	0.1878	0.3083	0.3884	6.3519	3.9885	3.3695	-0.3691	5.444	5.0468	0.4821	-1.9296	0.2632	0.2686	1.4688	6.4878	6.5371	5.6894	6.8573	5.8696	4.3452	-0.7017	-1.0278	-0.8212	-1.4292	-1.2924	0.9073	3.3871	8.275	3.2059	4.3934	9.2103	5.8573
S074WTS007	Codilean et al. 2022	2081.64		5.9699	10.8131	0.1354	0.3387	0.5989	3.5165	5.0899	5.3289	47.6373	92.2407	129.422	4.4127	5.2055	5.7839	0.0731	0.1946	0.3519	8.5503	5.0993	4.5686	0.9928	84.544	92.3826	1.5346	-2.6621	0.6244	0.3066	1.5137	8.0291	8.0331	8.1403	8.4318	7.7296	5.5178	2.5611	-0.504	-0.4401	-1.0142	-0.948	1.0458	15.449	7.543	3.2929	6.9689	9.3559	4.607
S186WTS001	Codilean et al. 2022	62684.6		2.5649	10.3063	0.11058	0.2488	0.3751	3.061	4.8016	4.8742	20.2771	35.3971	47.785	3.6755	4.1098	4.457	0.0659	0.1389	0.2114	7.2628	4.6652	4.0534	-0.0771	79.695	60.6487	1.154	-3.3298	0.5726	0.2818	1.4614	7.0036	7.0411	5.8782	6.8767	6.1642	4.5401	0.7597	-1.8676	-1.8301	-2.1295	-2.112	0.2405	18.6791	6.827	3.2429	4.2809	9.2103	5.0177
S009WTS033	Codilean et al. 2022	31622		3.2492	9.9423	0.06869	0.1314	0.208	2.8556	4.7348	4.7962	11.9398	18.6546	26.74	3.3173	3.7133	4.0224	0.0385	0.066	0.0977	6.7831	4.2103	3.4334	0.1628	39.032	44.8677	1.1577	-2.4453	0.6005	0.2746	1.4292	6.901	6.9393	5.5486	6.0538	6.1903	4.1403	0.928	-1.3681	-1.3045	-1.7638	-1.717	0.4771	0.0187	9.233	4.1284	4.2903	9.2103	4.623
S009WTS034	Codilean et al. 2022	168716		1.5748	9.9423	0.06869	0.1314	0.208	2.8556	4.7348	4.7962	11.9398	18.6546	26.74	3.3173	3.7133	4.0224	0.0385	0.066	0.0977	6.7831	4.2103	3.4334	0.1628	39.032	44.8677	1.1577	-2.4453	0.6005	0.2746	1.4292	6.901	6.9393	5.5486	6.0538	6.1903	4.1403	0.928	-1.3681	-1.3045	-1.7638	-1.717	0.4771	0.0187	9.233	4.1284	4.2903	9.2103	4.623
S257WTS001	Codilean et al. 2022	33701.4		3.1855	10.5258	0.21325	0.4203	0.5298	3.6994	5.0258	5.1154	37.2963	58.7562	76.7805	3.972	4.4665	4.8065	0.1304	0.2264	0.2924	6.2293	4.3705	3.7873	-0.5868	18.25	0.0111	0.543	-2.2682	0.3368	0.2468	1.3318	6.7045	6.6567	4.9613	5.7269	5.3963	3.4435	-0.5732	-1.8579	-1.865	-2.1362	-2.1388	0.214	64.8341	4.665	0	3.3518	9.2103	4.6884
S230WTS001	Codilean et al. 2022	664.98		7.1111	10.2921	0.41372	0.7331	0.8893	4.4881	5.4147	5.5625	86.6463	130.803	170.008	5.5875	6.0741	6.3729	0.3078	0.5244	0.6432	4.8239	4.0634	3.2395	-0.2418	0.069	5.1189	0.3596	-1.356	0.1126	0.2052	1.2913	6.5962	6.5148	6.4659	7.5827	6.6661	5.204	-1.0164	-0.0592	-0.0393	-0.5748	-0.5658	2.0992	32.2572	6.493	2.8014	6.4677	12.899	5.9939
S230WTS008	Codilean et al. 2022	686.833		7.0787	10.2921	0.41372	0.7331	0.8893	4.4881	5.4147	5.5625	86.6463	130.803	170.008	5.5875	6.0741	6.3729	0.3078	0.5244	0.6432	4.8239	4.0634	3.2395	-0.2418	0.069	5.1189	0.3596	-1.356	0.1126	0.2052	1.2913	6.5962	6.5148	6.4659	7.5827	6.6661	5.204	-1.0164	-0.0592	-0.0393	-0.5748	-0.5658	2.0992	32.2572	6.493	2.8014	6.4677	12.899	5.9939
S235WTS001	Codilean et al. 2022	5555.63		4.9883	10.5342	0.14782	0.3448	0.5204	3.5065	4.9507	5.0936	31.0366	54.7013	80.3508	3.7956	4.2636	4.709	0.0988	0.2002	0.3041	6.6042	4.5671	3.9089	-1.5842	0	0.8423	0.189	-0.9535	0.1378	0.1715	1.2444	5.8744	6.127	4.7462	6.0905	5.2803	3.6984	-2.3066	-0.392	-0.2842	-0.9019	-0.7864	1.5033	0.1553	10.936	4.3491	4.9487	9.2103	4.6223
S136WTS015	Codilean et al. 2022	26414.9		3.4291	10.3086	0.13663	0.275	0.407	3.3895	4.8828	4.9963	24.1727	41.0977	61.0271	3.6274	4.0571	4.3491	0.0797	0.1476	0.239	6.4387	4.2634	3.5455	-0.966	8.343	13.2366	0.6145	-2.0818	0.3611	0.2102	1.2683	6.3565	6.5152	4.3349	5.4262	5.1931	3.387	-0.9203	-1.3708	-1.2662	-1.7868	-1.7115	0.6184	12.5653	7.852	3.3805	4.6567	9.2103	4.6112
S230WTS002	Codilean et al. 2022	444.497		7.5139	10.2722	0.41352	0.7342	0.8908	4.4894	5.4169	5.5649	86.741	131.118	170.48	5.5872	6.08	6.3734	0.3082	0.5253	0.6443	4.8191	4.054	3.2331	-0.2381	0.07	5.1684	0.3555	-1.3478	0.11	0.2054	1.2928	6.5935	6.5081	6.4448	7.5625	6.665	5.2035	-1.0261	-0.0549	-0.0351	-0.5702	-0.5616	2.1041	31.592	6.548	2.82	6.4804	12.9182	6.0001
S230WTS003	Codilean et al. 2022	611.14		7.1955	10.2721	0.41353	0.7342	0.8908	4.4894	5.4169	5.5649	86.7431	131.127	170.485	5.5872	6.0801	6.3734	0.3082	0.5254	0.6443	4.8191	4.054	3.2331	-0.2381	0.07	5.1691	0.3555	-1.3478	0.1099	0.2054	1.2928	6.5934	6.5081	6.4448	7.5625	6.6651	5.2037	-1.0263	-0.0549	-0.0351	-0.5702	-0.5616	2.1041	31.5863	6.549	2.8202	6.4806	12.9184	6.0002
S127WTS051	Codilean et al. 2022	10928		4.3117	10.6641	0.27279	0.4941	0.6299	4.0399	5.1638	5.3161	52.5857	79.7719	107.241	4.5288	4.9752	5.3669	0.1709	0.2904	0.3736	6.4377	4.3674	3.9018	-0.796	16.278	7.9075	0.5526	-2.1219	0.3083	0.2376	1.3231	6.5377	6.4859	4.648	5.8714	5.1749	3.448	-0.9535	-0.9046	-0.8658	-1.3996	-1.3579	1.1295	3.8785	6.906	0.1235	2.7109	9.2103	4.6054
S258WTS003	Codilean et al. 2022	6184.73		4.881	10.7369	0.25972	0.4903	0.6441	4.1206	5.247	5.402	53.0042	84.3049	117.219	5.0725	5.6546	6.0182	0.1555	0.2785	0.3685	7.492	4.7398	4.2673	0.3247	44.232	50.7085	1.1821	-2.2818	0.5204	0.2578	1.3104	7.4713	7.5085	7.1339	7.5051	6.8647	4.7197	1.3308	-0.478	-0.4319	-1.0183	-0.9644	1.3888	37.3502	5.93	2.968	4.3845	9.2813	4.6052
S074WTS006	Codilean et al. 2022	2080.05		5.9707	10.7007	0.1477	0.3741	0.6183	3.588	5.1202	5.3476	48.877	93.2139	130.283	4.4982	5.2763	5.821	0.0808	0.2145	0.3636	8.5165	5.1075	4.5593	0.9954	83.221	91.8427	1.5209	-2.6409	0.6182	0.3036	1.5037	8.028	8.0406	8.0097	8.3018	7.712	5.5007	2.5533	-0.437	-0.3802	-0.9537	-0.8928	1.0847	17.2834	7.117	3.1489	6.9689	9.3718	4.6072
S074WTS005	Codilean et al. 2022	1437.87		6.3399	10.6931	0.1487	0.3765	0.6196	3.5934	5.1223	5.3487	48.9658	93.2545	130.371	4.5043	5.2803	5.8233	0.0813	0.2158	0.3642	8.5151	5.108	4.5585	0.9958	83.128	91.8635	1.5209	-2.6395	0.6179	0.3034	1.5033	8.0281	8.0416	8.0089	8.3011	7.7185	5.5073	2.5537	-0.4317	-0.3754	-0.9488	-0.8887	1.0867	17.4143	7.085	3.136	6.9689	9.3729	4.6073
S120WTS014	Codilean et al. 2022	73019.7		2.4123	10.6712	0.0821	0.1594	0.2983	3.0425	4.7879	4.9598	17.888	33.5642	56.4881	3.8854	4.4122	5.0947	0.0423	0.0757	0.1656	8.7431	4.7152	4.4255	0.2553	60.696	80.833	1.2718	-2.5562	0.5856	0.2526	1.2215	7.5258	7.4651	6.616	7.3624	6.4702	4.6496	1.4106	-1.9791	-1.9248	-2.1628	-2.1371	0.335	100	2.125	0	2.3026	9.2103	4.6052
S111WTS004	Codilean et al. 2022	1005.32		6.6978	10.4256	0.30025	0.5616	0.7354	4.145	5.2461	5.4873	60.971	99.6188	142.405	5.4274	5.9417	6.5014	0.1985	0.3683	0.5077	6.2372	4.5138	3.7689	-0.6104	7.747	14.3373	0.396	-1.2073	0.1577	0.2618	1.4008	6.4626	7.226	6.605	7.8031	6.6714	5.2867	-0.5699	-0.5823	-0.3313	-1.0712	-0.8962	1.328	29.9464	6.793	3.4562	5.4129	10.8676	5.7524
S186WTS005	Codilean et al. 2022	60229.1		2.6049	10.1231	0.12268	0.2708	0.3915	3.1082	4.8129	4.8816	21.3759	36.4963	48.701	3.7249	4.1508	4.4764	0.0735	0.1518	0.221	7.2193	4.6514	4.0498	-0.0752	80.848	64.3699	1.1739	-3.3524	0.5756	0.2829	1.4627	6.9976	7.0269	5.6672	6.7557	6.1418	4.5952	0.7568	-1.8773	-1.8496	-2.1303	-2.1178	0.2416	9.8269	7.359	3.3797	4.304	9.2103	5.0601
S164WTS078	Codilean et al. 2022	56316.5		2.6721	10.5791	0.05835	0.1127	0.2526	2.9075	4.7203	4.839	14.0732	24.4909	46.7317	3.4286	3.7137	4.3079	0.032	0.049	0.1243	7.8309	4.7283	4.338	-0.3639	14.792	20.0186	0.9652	-2.0441	0.4717	0.2421	1.2372	7.0795	7.1061	5.2915	6.6246	5.5571	4.087	0.3338	-1.3119	-1.2167	-1.7702	-1.6939	0.1138	99.7478	2.006	0	2.3026	9.2103	4.6052
S164WTS077	Codilean et al. 2022	59438.4		2.6181	10.5791	0.05835	0.1127	0.2526	2.9075	4.7203	4.839	14.0732	24.4909	46.7317	3.4286	3.7137	4.3079	0.032	0.049	0.1243	7.8309	4.7283	4.338	-0.3639	14.792	20.0186	0.9652	-2.0441	0.4717	0.2421	1.2372	7.0795	7.1061	5.2915	6.6246	5.5571	4.087	0.3338	-1.3119	-1.2167	-1.7702	-1.6939	0.1138	99.7478	2.006	0	2.3026	9.2103	4.6052
S116WTS007	Codilean et al. 2022	176768		1.5282	10.2868	0.06431	0.1394	0.3546	2.9717	4.7533	4.834	15.9431	27.3618	46.6572	2.7636	3.0328	3.2177	0.0412	0.0801	0.1758	6.1707	4.1829	3.5754	-1.3636	8.406	0.0506	0.307	-2.0675	0.1936	0.1556	1.1289	6.0273	5.859	1.7181	1.9851	4.6631	2.3646	-2.2228	-1.9058	-1.8547	-2.1464	-2.1219	0.3634	7.6546	4.347	0	2.3026	9.2103	4.6052
S082WTS013	Codilean et al. 2022	1656.3		6.1985	10.4103	0.24416	0.4898	0.6261	4.1028	5.2363	5.39	51.496	86.0141	117.16	4.7516	5.2808	5.7102	0.1597	0.3063	0.4053	6.6366	4.301	3.7969	-1.5271	7.244	2.7466	0.4178	-1.6089	0.2001	0.2303	1.249	5.7537	6.4572	4.2656	5.4	5.1208	3.3044	-1.8175	-0.4763	-0.4552	-1.0272	-0.9886	1.0237	51.4043	6.355	3.3251	3.2658	9.2103	4.8036
S136WTS014	Codilean et al. 2022	30395.4		3.2888	10.1365	0.14034	0.2838	0.4165	3.4169	4.8924	5.0064	25.0244	42.6338	62.7961	3.6436	4.0654	4.3562	0.0821	0.1539	0.2463	6.371	4.2496	3.5351	-0.9866	9.039	14.1345	0.6203	-2.0899	0.3589	0.2102	1.263	6.3296	6.5093	4.1377	5.2261	5.1817	3.3682	-0.9468	-1.3677	-1.2634	-1.7838	-1.7093	0.6152	11.3425	7.803	3.3018	4.6567	9.2103	4.6123
S111WTS001	Codilean et al. 2022	3495.17		5.4517	10.3561	0.29195	0.5571	0.7346	4.1176	5.2177	5.4891	58.8892	96.5049	141.294	5.4079	5.9249	6.5038	0.1916	0.3586	0.5072	6.2114	4.4084	3.6634	-0.7074	5.742	12.2026	0.3324	-1.1609	0.1273	0.2614	1.4	6.326	7.1975	6.2702	7.2918	6.4436	4.8723	-0.7475	-0.6377	-0.3525	-1.1144	-0.9175	1.3031	26.9105	6.963	3.5234	5.4149	10.9242	5.7987
S111WTS002	Codilean et al. 2022	3752.53		5.3806	10.3289	0.28495	0.5457	0.7221	4.0915	5.1944	5.4615	57.151	92.9625	136.637	5.377	5.8666	6.4556	0.1866	0.3466	0.4943	6.1962	4.3711	3.627	-0.7681	4.367	10.8399	0.2988	-1.1404	0.1151	0.2619	1.4016	6.2508	7.1761	6.2047	7.2186	6.4115	4.8299	-0.8439	-0.6634	-0.3614	-1.1338	-0.9266	1.2849	25.694	7.056	3.5498	5.4196	10.9465	5.8146
S111WTS003	Codilean et al. 2022	3266.39		5.5194	10.3132	0.27988	0.5385	0.714	4.068	5.1809	5.4375	55.7984	90.3494	132.766	5.3405	5.8198	6.3866	0.1833	0.3386	0.4842	6.1944	4.3521	3.6076	-0.7968	3.631	10.1049	0.2462	-1.1279	0.1108	0.2619	1.4012	6.2198	7.1561	6.1617	7.172	6.3887	4.8015	-0.8942	-0.6749	-0.3663	-1.1426	-0.9314	1.2761	24.521	7.138	3.565	5.4113	10.9312	5.8178
S111WTS006	Codilean et al. 2022	543.636		7.3125	10.3132	0.27988	0.5385	0.714	4.068	5.1809	5.4375	55.7979	90.349	132.767	5.3405	5.8198	6.3865	0.1833	0.3386	0.4842	6.1944	4.3521	3.6076	-0.7968	3.63	10.1024	0.2462	-1.1279	0.1108	0.2619	1.4012	6.2197	7.1561	6.1617	7.172	6.3887	4.8015	-0.8942	-0.6749	-0.3663	-1.1426	-0.9314	1.2761	24.5205	7.139	3.565	5.4113	10.9312	5.8179
S009WTS042	Codilean et al. 2022	32951.9		3.208	9.8152	0.05272	0.1746	0.2644	3.0729	4.8037	4.8932	16.3643	27.0298	39.7329	3.4853	3.9599	4.3627	0.049	0.0913	0.139	6.5818	4.3528	3.6337	-0.0778	18.496	32.6386	1.1782	-2.2368	0.6308	0.2736	1.3855	6.8231	6.8989	5.1768	5.5741	6.0003	3.8522	0.789	-1.3478	-1.3012	-1.8189	-1.7856	0.4695	49.5662	6.176	3.3898	4.5665	9.2103	4.6527
S136WTS016	Codilean et al. 2022	26622		3.4213	10.0629	0.14226	0.2869	0.42	3.4291	4.8968	5.0116	25.4188	43.2814	63.6298	3.6467	4.0655	4.3558	0.0837	0.1581	0.2507	6.314	4.2431	3.5291	-0.9969	9.438	14.7945	0.612	-2.0867	0.353	0.2102	1.2591	6.3168	6.5096	4.0613	5.1516	5.1804	3.3674	-0.9697	-1.3505	-1.2448	-1.7714	-1.6955	0.6259	9.6669	7.942	3.3214	4.6567	9.2103	4.6128
S164WTS075	Codilean et al. 2022	77022.7		2.359	10.4744	0.05093	0.0969	0.2039	2.8319	4.6951	4.7705	11.5945	18.494	36.9198	3.3843	3.6516	4.2073	0.0269	0.039	0.0943	7.8789	4.735	4.3462	-0.3308	15.119	18.8927	0.9535	-2.0402	0.4713	0.2436	1.231	7.1093	7.1305	5.265	6.6246	5.6057	4.1746	0.3789	-1.3432	-1.241	-1.7928	-1.7115	0.1164	99.724	2.006	0	2.3026	9.2103	4.6052
S111WTS007	Codilean et al. 2022	2637.39		5.7333	10.2601	0.26308	0.5119	0.6816	3.9823	5.1416	5.3371	51.1898	82.6363	118.585	5.1766	5.6571	6.17	0.1725	0.3148	0.4464	6.1953	4.3063	3.5659	-0.8961	1.299	7.8953	0.1976	-1.0847	0.0973	0.2617	1.4004	6.1089	7.0868	5.9972	6.9998	6.2967	4.6924	-1.0645	-0.6988	-0.377	-1.1619	-0.9421	1.2506	20.4357	7.426	3.6164	5.3053	10.8873	5.8261
S026WTS025	Codilean et al. 2022	8838.39		4.524	9.905	0.10623	0.1956	0.2761	3.0162	4.7607	4.7924	16.6512	25.178	33.5534	3.703	4.0089	4.215	0.0666	0.1093	0.1486	7.12	4.6071	3.9616	0.0866	89.258	62.6528	1.1291	-3.6574	0.5623	0.2924	1.4979	6.9926	7.0118	5.8106	7.0408	6.435	5.0568	0.8325	-1.863	-1.8637	-2.112	-2.112	0.257	0	5.241	0.8059	5.0689	9.2103	5.4931
S127WTS053	Codilean et al. 2022	11230.7		4.2844	10.3616	0.27636	0.5005	0.6367	4.0614	5.1803	5.3334	53.8759	82.0851	110.27	4.5457	4.998	5.4056	0.1733	0.2966	0.3812	6.5045	4.2786	3.7979	-0.794	12.663	6.2263	0.496	-2.0747	0.2842	0.2394	1.3258	6.5384	6.4624	4.349	5.6711	5.1761	3.5183	-1.0349	-0.9271	-0.8836	-1.4004	-1.3563	1.148	5.2461	6.81	0.1199	2.7109	9.2103	4.6055
S143WTS026	Codilean et al. 2022	3096.95		5.5726	9.756	0.27241	0.624	0.8073	3.9532	5.2987	5.4707	70.6429	119.413	157.576	4.8754	5.5979	6.024	0.198	0.4423	0.5728	7.1533	4.736	3.8866	0.0777	25.06	42.6896	0.8843	-2.1312	0.4055	0.2796	1.3429	6.9651	6.877	6.0102	6.7466	6.7346	4.9207	0.3014	-1.0054	-0.8972	-1.4979	-1.4135	0.7609	50.4336	7.411	3.8491	5.8951	10.1525	5.3542
S009WTS031	Codilean et al. 2022	38132.9		3.062	9.5914	0.06909	0.1314	0.2078	2.8013	4.717	4.7768	11.0949	17.4547	24.7237	3.2168	3.5489	3.8807	0.0379	0.0644	0.0958	6.7709	4.2169	3.4344	0.1308	36.363	45.5543	1.1481	-2.4046	0.6023	0.2753	1.428	6.8811	6.9422	5.2255	5.7148	6.2109	4.1486	0.9108	-1.6049	-1.539	-1.9105	-1.8663	0.4253	0	9.632	4.2152	2.3026	9.2103	4.6052
S038WTS035	Codilean et al. 2022	98180.7		2.1163	10.2813	0.0716	0.1527	0.3028	3.1642	4.8051	4.9128	15.7158	25.3439	41.9054	3.2191	3.5779	4.0026	0.0367	0.0645	0.1237	5.8914	4.1577	3.5858	-1.6234	0.136	2.923	0.364	-1.5087	0.1964	0.1472	1.115	5.8321	5.9162	2.7549	3.9402	4.7616	2.6777	-2.3645	-1.8079	-1.751	-2.0939	-2.0659	0.2705	88.5312	3.781	2.5105	2.3026	9.2103	4.6052
S218WTS005	Codilean et al. 2022	157621		1.6429	10.284	0.04305	0.085	0.2298	2.983	4.7492	4.8479	13.5207	20.1641	39.8194	2.9294	3.1841	3.5275	0.0253	0.0383	0.0891	5.8807	4.2354	3.6624	-1.543	1.632	4.0714	0.4083	-1.8579	0.2183	0.1455	1.0906	5.9359	6.017	0.8904	2.8043	4.6309	2.4386	-2.1596	-1.8012	-1.7043	-2.0899	-2.0387	0.2705	69.435	5.23	3.3967	2.3026	9.2103	4.6052
S008WTS007	Codilean et al. 2022	144230		1.7317	10.2827	0.04845	0.085	0.2299	2.9826	4.7492	4.8477	13.524	20.1745	39.8339	2.9294	3.1838	3.5274	0.0253	0.0383	0.0891	5.8837	4.2354	3.6624	-1.5421	1.633	4.0664	0.4083	-1.8605	0.2186	0.1456	1.0903	5.9371	6.0187	0.8904	2.8043	4.6309	2.4388	-2.1567	-1.8	-1.7032	-2.0899	-2.0387	0.2705	69.4015	5.231	3.3978	2.3026	9.2103	4.6052
S136WTS002	Codilean et al. 2022	25410		3.4679	9.5085	0.06409	0.1338	0.2335	2.9095	4.7468	4.8293	13.5761	22.5702	35.6119	3.3572	3.7757	4.1306	0.0389	0.0699	0.1259	6.332	4.2825	3.5607	-0.2817	30.576	33.5741	0.8391	-2.2064	0.505	0.2607	1.3839	6.4723	6.6627	5.0536	5.8228	6.1399	4.3112	0.103	-1.8728	-1.822	-2.1236	-2.098	0.3724	19.1928	9.502	4.1968	4.5098	9.2103	5.3445
S230WTS009	Codilean et al. 2022	536.871		7.3251	9.8766	0.39389	0.7342	0.895	4.4213	5.3949	5.5491	82.6974	128.179	168.211	5.4993	5.9719	6.3763	0.2921	0.5212	0.6502	4.851	3.9668	3.1779	-0.2327	0.099	5.55	0.3199	-1.2372	0.0932	0.2057	1.287	6.5502	6.3911	5.913	7.0186	6.5458	5.0624	-1.1661	0.0136	0.0455	-0.4961	-0.4782	2.1467	30.7421	6.696	2.8738	6.4211	12.972	6.0157
S230WTS004	Codilean et al. 2022	561.915		7.2795	9.8766	0.39389	0.7342	0.895	4.4213	5.3949	5.5491	82.6974	128.179	168.211	5.4993	5.9719	6.3763	0.2921	0.5212	0.6502	4.851	3.9668	3.1779	-0.2327	0.099	5.55	0.3199	-1.2372	0.0932	0.2057	1.287	6.5502	6.3911	5.913	7.0186	6.5458	5.0624	-1.1661	0.0136	0.0455	-0.4961	-0.4782	2.1467	30.7421	6.696	2.8738	6.4211	12.972	6.0157
S218WTS004	Codilean et al. 2022	159160		1.6332	10.2271	0.04126	0.0756	0.2205	2.9676	4.7453	4.8438	13.4096	20.0984	39.8435	2.9168	3.161	3.4802	0.0249	0.0364	0.0889	5.9186	4.2408	3.6789	-1.5181	1.727	4.2832	0.4253	-1.8682	0.2267	0.1468	1.0868	5.9707	6.0491	0.5122	2.5906	4.6239	2.42	-2.0912	-1.7964	-1.6955	-2.0875	-2.0349	0.2705	69.1798	5.227	3.4193	2.3026	9.2103	4.6052
S009WTS019	Codilean et al. 2022	10803.4		4.3232	9.5398	0.11428	0.1913	0.3123	2.9995	4.7703	4.8328	16.4976	26.7769	39.5005	3.5282	3.9202	4.1588	0.0531	0.0939	0.1517	6.7404	4.3071	3.4882	0.1653	39.034	48.2601	1.0695	-2.3958	0.5633	0.2874	1.4645	6.9211	6.8687	5.0876	5.8298	6.1422	4.2903	0.7724	-1.2553	-1.2053	-1.6912	-1.6534	0.5403	0.446	8.212	3.3598	4.4171	9.2103	4.9775
S026WTS019	Codilean et al. 2022	28413.5		3.3562	9.7758	0.14633	0.2934	0.4329	3.1713	4.8207	4.8827	21.6778	35.6795	50.9515	4.0024	4.4144	4.6507	0.0735	0.1328	0.2039	7.1354	4.6048	3.9961	0.0816	88.434	82.1894	1.1995	-3.642	0.5619	0.2892	1.4859	7.0321	7.0692	5.8008	7.1224	6.5357	5.2548	0.8769	-1.969	-1.9618	-2.1602	-2.1568	0.2113	1.3651	7.327	1.6652	4.9744	9.2103	5.4473
S193WTS045	Codilean et al. 2022	904.64		6.8033	9.9833	0.53805	0.7596	0.9024	4.5878	5.4721	5.5928	98.82	140.897	180.901	5.364	5.8623	6.1397	0.3378	0.5263	0.6296	6.4913	4.3149	3.6808	0.077	50.749	45.3939	0.9044	-2.5096	0.4138	0.2804	1.3763	6.7646	6.9734	5.8857	6.566	6.4326	4.55	0.4052	-0.6077	-0.0714	-1.1093	-0.8768	1.1265	17.1971	7.296	1.8334	4.4904	9.2103	5.6633
S193WTS046	Codilean et al. 2022	741.749		7.0018	9.9833	0.53805	0.7596	0.9024	4.5878	5.4721	5.5928	98.82	140.897	180.901	5.364	5.8623	6.1397	0.3378	0.5263	0.6296	6.4913	4.3149	3.6808	0.077	50.749	45.3939	0.9044	-2.5096	0.4138	0.2804	1.3763	6.7646	6.9734	5.8857	6.566	6.4326	4.55	0.4052	-0.6077	-0.0714	-1.1093	-0.8768	1.1265	17.1971	7.296	1.8334	4.4904	9.2103	5.6633
S009WTS020	Codilean et al. 2022	12403.3		4.1851	9.4761	0.09497	0.1883	0.3095	3.0036	4.7713	4.8335	16.4321	26.6074	39.1926	3.5369	3.9217	4.1604	0.0525	0.0925	0.148	6.7502	4.3107	3.4915	0.164	38.81	47.8111	1.0693	-2.398	0.5633	0.2872	1.464	6.9187	6.8667	5.0333	5.7801	6.1492	4.302	0.7697	-1.2455	-1.1884	-1.6836	-1.6409	0.5496	0.2742	8.259	3.3795	4.4171	9.2103	4.9967
S009WTS022	Codilean et al. 2022	14768		4.0106	9.4761	0.094	0.1883	0.3095	3.0036	4.7713	4.8335	16.4321	26.6074	39.1926	3.5369	3.9217	4.1604	0.0525	0.0925	0.148	6.7502	4.3107	3.4915	0.164	38.81	47.8111	1.0693	-2.398	0.5633	0.2872	1.464	6.9187	6.8667	5.0333	5.7801	6.1492	4.302	0.7697	-1.2455	-1.1884	-1.6836	-1.6409	0.5496	0.2742	8.259	3.3795	4.4171	9.2103	4.9967
S009WTS021	Codilean et al. 2022	9718.55		4.429	9.4761	0.09497	0.1883	0.3095	3.0036	4.7713	4.8335	16.4321	26.6074	39.1926	3.5369	3.9217	4.1604	0.0525	0.0925	0.148	6.7502	4.3107	3.4915	0.164	38.81	47.8111	1.0693	-2.398	0.5633	0.2872	1.464	6.9187	6.8667	5.0333	5.7801	6.1492	4.302	0.7697	-1.2455	-1.1884	-1.6836	-1.6409	0.5496	0.2742	8.259	3.3795	4.4171	9.2103	4.9967
S091WTS003	Codilean et al. 2022	92287.7		2.1782	9.3257	0.04628	0.0986	0.1788	2.862	4.7364	4.7955	12.6749	21.4235	32.6016	3.2964	3.7349	4.0838	0.0296	0.0556	0.1038	5.9779	4.0968	3.2387	-0.7019	19.341	16.0859	0.605	-2.2789	0.3825	0.2337	1.3413	6.0768	6.0217	4.3859	4.8981	5.7801	3.7058	-1.0864	-0.4181	-0.2742	-1.193	-1.0068	1.1073	20.6564	8.62	3.5375	4.1692	9.2103	5.0893
S009WTS043	Codilean et al. 2022	22617.3		3.5844	9.5693	0.03393	0.2073	0.3202	3.2825	4.8715	4.9652	20.4518	33.4465	50.527	3.8428	4.3889	4.5821	0.0603	0.1116	0.1677	6.4693	4.3574	3.6474	-0.1184	26.144	38.4113	1.1576	-2.2996	0.605	0.2741	1.3567	6.7818	6.87	4.9085	5.369	5.9824	3.8833	0.666	-1.1881	-1.1498	-1.6999	-1.6703	0.4959	64.1042	4.815	2.8348	4.6739	9.2103	4.7241
S009WTS044	Codilean et al. 2022	20991.8		3.6589	9.5693	0.03393	0.2073	0.3202	3.2825	4.8715	4.9652	20.4518	33.4465	50.527	3.8428	4.3889	4.5821	0.0603	0.1116	0.1677	6.4693	4.3574	3.6474	-0.1184	26.144	38.4113	1.1576	-2.2996	0.605	0.2741	1.3567	6.7818	6.87	4.9085	5.369	5.9824	3.8833	0.666	-1.1881	-1.1498	-1.6999	-1.6703	0.4959	64.1042	4.815	2.8348	4.6739	9.2103	4.7241
S016WTS006	Codilean et al. 2022	603.746		7.2077	9.9804	0.52842	0.724	0.89	4.7028	5.5192	5.722	97.6974	137.539	186.451	6.0553	6.4774	6.8883	0.3288	0.499	0.628	7.2309	5.025	4.2805	0.1788	28.856	39.5631	1.0539	-2.3341	0.3483	0.2445	1.3927	7.3052	7.4243	6.2869	7.4841	6.7818	5.4051	0.6987	-0.1784	-0.2058	-0.7945	-0.8065	1.6132	57.3307	4.71	2.6952	6.6383	11.8714	5.5489
S016WTS005	Codilean et al. 2022	591.356		7.2284	9.9804	0.52843	0.724	0.89	4.7028	5.5192	5.722	97.6996	137.54	186.457	6.0553	6.4774	6.8883	0.3288	0.499	0.628	7.2309	5.025	4.2805	0.1788	28.856	39.5602	1.0539	-2.3341	0.3483	0.2445	1.3927	7.3052	7.4243	6.2869	7.4841	6.7818	5.4052	0.6987	-0.1784	-0.2058	-0.7945	-0.8065	1.6132	57.333	4.71	2.6952	6.6383	11.8714	5.5489
S009WTS030	Codilean et al. 2022	29218.4		3.3283	9.4156	0.01496	0.1382	0.2154	2.8126	4.7187	4.779	11.3236	17.6687	24.9791	3.2013	3.5494	3.878	0.0403	0.0676	0.0997	6.7693	4.2194	3.4386	0.1394	39.066	48.2881	1.1637	-2.4338	0.6106	0.2764	1.4321	6.8914	6.9545	4.9753	5.4686	6.1508	4.0885	0.9496	-1.7574	-1.7104	-2.0017	-1.9733	0.3778	0	9.744	4.2394	2.3026	9.2103	4.6052
S009WTS024	Codilean et al. 2022	8530.3		4.5594	9.4343	0.04962	0.1829	0.3014	2.9958	4.7663	4.8278	16.0154	25.96	38.4265	3.5262	3.9148	4.1615	0.0512	0.0899	0.1433	6.7569	4.3129	3.4953	0.1607	37.618	46.8014	1.0765	-2.3871	0.5619	0.2871	1.4636	6.9158	6.8643	5.0005	5.7492	6.1561	4.3112	0.7615	-1.2313	-1.1738	-1.6745	-1.6307	0.5551	0.2792	8.281	3.3992	4.4199	9.2103	5.0038
S009WTS023	Codilean et al. 2022	9195.44		4.4844	9.4343	0.04962	0.1829	0.3014	2.9958	4.7663	4.8278	16.0154	25.96	38.4265	3.5262	3.9148	4.1615	0.0512	0.0899	0.1433	6.7569	4.3129	3.4953	0.1607	37.618	46.8014	1.0765	-2.3871	0.5619	0.2871	1.4636	6.9158	6.8643	5.0005	5.7492	6.1561	4.3112	0.7615	-1.2313	-1.1738	-1.6745	-1.6307	0.5551	0.2792	8.281	3.3992	4.4199	9.2103	5.0038
S136WTS013	Codilean et al. 2022	24493.5		3.5047	9.7691	0.14614	0.297	0.4346	3.4793	4.9113	5.0289	26.8408	45.9131	66.8786	3.7027	4.1034	4.413	0.088	0.1692	0.2621	6.1681	4.2252	3.5128	-1.0062	10.026	15.4889	0.5729	-2.0691	0.3342	0.2105	1.2444	6.3011	6.526	3.8244	4.8946	5.205	3.3907	-1.0118	-1.2823	-1.1692	-1.7232	-1.6399	0.6738	7.254	8.44	3.4516	4.6567	9.2103	4.6154
S230WTS005	Codilean et al. 2022	499.654		7.3969	9.7275	0.38661	0.7352	0.9006	4.3923	5.3878	5.5587	81.053	127.001	168.584	5.4614	5.9614	6.377	0.2858	0.5188	0.6516	4.8684	3.9276	3.1544	-0.2024	0.107	6.0527	0.2846	-1.193	0.0777	0.2048	1.2928	6.5442	6.3412	5.679	6.8963	6.4729	5.0868	-1.2262	0.0344	0.073	-0.4722	-0.4488	2.1525	29.8266	6.895	2.9695	6.4897	13.0764	6.04
S064WTS002	Codilean et al. 2022	2005.86		6.007	9.9041	0.5251	0.7534	0.8942	4.5623	5.4662	5.5868	96.8875	138.873	177.908	5.3008	5.8331	6.1149	0.332	0.5188	0.6222	6.4813	4.3003	3.6649	0.0624	50.711	44.9595	0.9004	-2.4986	0.4145	0.2792	1.3752	6.7606	6.9589	5.7782	6.4437	6.4087	4.5112	0.3834	-0.6086	-0.0785	-1.1081	-0.8751	1.1357	17.3581	7.178	1.4765	4.4557	9.2103	5.6591
S064WTS014	Codilean et al. 2022	1667.42		6.1918	9.9041	0.5251	0.7534	0.8942	4.5623	5.4662	5.5868	96.8875	138.873	177.908	5.3008	5.8331	6.1149	0.332	0.5188	0.6222	6.4813	4.3003	3.6649	0.0624	50.711	44.9595	0.9004	-2.4986	0.4145	0.2792	1.3752	6.7606	6.9589	5.7782	6.4437	6.4087	4.5112	0.3834	-0.6086	-0.0785	-1.1081	-0.8751	1.1357	17.3581	7.178	1.4765	4.4557	9.2103	5.6591
S193WTS036	Codilean et al. 2022	706.753		7.0501	9.8992	0.52978	0.7535	0.8944	4.5626	5.466	5.5863	96.924	138.905	177.916	5.3002	5.8326	6.1143	0.3321	0.5189	0.6223	6.4792	4.3003	3.6649	0.0626	50.74	44.9888	0.9004	-2.4986	0.4146	0.2792	1.3752	6.7605	6.9594	5.7782	6.4437	6.4127	4.5155	0.3843	-0.6086	-0.0785	-1.1081	-0.8751	1.137	17.3164	7.18	1.4752	4.4568	9.2103	5.6593
S193WTS037	Codilean et al. 2022	1362.44		6.3938	9.8992	0.52978	0.7535	0.8944	4.5626	5.4659	5.5863	96.924	138.905	177.916	5.3002	5.8325	6.1142	0.3321	0.5189	0.6223	6.4792	4.3003	3.6649	0.0626	50.74	44.9888	0.9004	-2.4986	0.4146	0.2792	1.3752	6.7605	6.9594	5.7782	6.4437	6.4127	4.5155	0.3843	-0.6086	-0.0785	-1.1081	-0.8751	1.137	17.3162	7.18	1.4752	4.4568	9.2103	5.6593
S193WTS035	Codilean et al. 2022	735.078		7.0108	9.8992	0.52978	0.7535	0.8944	4.5626	5.4659	5.5863	96.924	138.905	177.916	5.3002	5.8325	6.1142	0.3321	0.5189	0.6223	6.4792	4.3003	3.6649	0.0626	50.74	44.9888	0.9004	-2.4986	0.4146	0.2792	1.3752	6.7605	6.9594	5.7782	6.4437	6.4127	4.5155	0.3843	-0.6086	-0.0785	-1.1081	-0.8751	1.137	17.3162	7.18	1.4752	4.4568	9.2103	5.6593
S218WTS003	Codilean et al. 2022	148164		1.7047	10.0962	0.03446	0.0553	0.1831	2.9115	4.7331	4.8207	11.4873	18.0575	32.4018	2.8254	3.0723	3.3643	0.0211	0.0304	0.0783	5.9862	4.2525	3.7033	-1.4732	1.925	4.8329	0.4397	-1.8971	0.243	0.1501	1.0762	6.0333	6.1122	0.2374	1.7364	4.6213	2.3612	-1.9604	-1.7988	-1.6901	-2.0883	-2.031	0.2705	67.0692	5.391	3.5192	2.3026	9.2103	4.6052
S127WTS054	Codilean et al. 2022	7663.88		4.6665	10.1065	0.27289	0.4982	0.6313	4.0564	5.1852	5.3429	53.4865	82.2894	110.882	4.5887	5.0111	5.4361	0.1709	0.2948	0.3788	6.532	4.2432	3.7515	-0.7761	8.066	3.0126	0.4019	-2.0227	0.256	0.2402	1.3292	6.5568	6.4658	4.2917	5.6176	5.2665	3.6635	-1.0919	-0.8826	-0.8405	-1.354	-1.3112	1.1686	6.7667	6.782	0.1394	2.7109	9.2103	4.6056
S120WTS013	Codilean et al. 2022	93882.5		2.161	10.2007	0.06139	0.1138	0.1771	2.6404	4.6629	4.7437	9.6957	16.9827	32.3119	3.5927	3.748	4.7511	0.0208	0.0301	0.0619	8.5533	4.9418	4.5776	0.397	67.894	97.631	1.4346	-2.5943	0.5915	0.275	1.2249	7.5228	7.4468	6.2983	7.3195	6.5997	5.0421	1.5183	-2.0441	-1.9762	-2.1866	-2.1516	0.4125	100	2	0	2.3026	9.2103	4.6052
S120WTS012	Codilean et al. 2022	84358.2		2.268	10.2007	0.06139	0.1138	0.1771	2.6404	4.6629	4.7437	9.6957	16.9827	32.3119	3.5927	3.748	4.7511	0.0208	0.0301	0.0619	8.5533	4.9418	4.5776	0.397	67.894	97.631	1.4346	-2.5943	0.5915	0.275	1.2249	7.5228	7.4468	6.2983	7.3195	6.5997	5.0421	1.5183	-2.0441	-1.9762	-2.1866	-2.1516	0.4125	100	2	0	2.3026	9.2103	4.6052
S009WTS046	Codilean et al. 2022	22832.7		3.5749	9.4934	0.1023	0.2155	0.3276	3.32	4.8782	4.9702	21.0062	33.9436	51.0352	3.8861	4.3975	4.6037	0.0637	0.1156	0.1716	6.4665	4.3649	3.6557	-0.1152	27.57	39.9212	1.1606	-2.3167	0.6034	0.2743	1.3571	6.785	6.8797	4.8466	5.3109	5.9925	3.897	0.6726	-1.1654	-1.1282	-1.6847	-1.655	0.5029	68.9392	4.44	2.6402	4.6739	9.2103	4.733
S074WTS004	Codilean et al. 2022	1327.54		6.4197	10.1922	0.1751	0.4192	0.6341	3.7497	5.1623	5.3778	48.7153	90.4164	126.914	4.723	5.4703	5.9378	0.0975	0.2402	0.3721	8.4417	5.0999	4.5216	1.026	78.846	89.5851	1.5151	-2.5863	0.6047	0.2932	1.4414	8.0436	8.0915	7.5659	7.8394	7.7726	5.5436	2.5851	-0.222	-0.1907	-0.7578	-0.7187	1.1641	21.6267	7.104	3.087	6.9689	9.4657	4.6086
S074WTS016	Codilean et al. 2022	14236.5		4.0473	10.1903	0.048	0.0862	0.1579	2.592	4.658	4.6972	7.6926	14.0331	25.2326	3.4237	3.741	4.4304	0.0172	0.0263	0.0574	8.7993	5.1312	4.6592	1.1046	93.644	98.9187	1.6506	-2.7442	0.6724	0.323	1.5343	8.1653	8.243	7.6229	7.8956	7.829	5.5995	2.9515	-1.0106	-0.8212	-1.4259	-1.2518	0.7986	0	8.94	3.2284	2.3026	9.2103	4.6052
S064WTS005	Codilean et al. 2022	1999.26		6.0103	9.8609	0.5196	0.7469	0.8868	4.5463	5.4615	5.5831	95.549	137.389	176.459	5.2699	5.8081	6.0768	0.3282	0.5136	0.6184	6.4725	4.2834	3.6481	0.0569	49.398	43.9521	0.8898	-2.4781	0.4092	0.2777	1.3732	6.7574	6.9481	5.7538	6.4125	6.4242	4.5217	0.3561	-0.6151	-0.0957	-1.1129	-0.8853	1.1424	15.4596	7.26	1.4643	4.4618	9.2103	5.668
S193WTS034	Codilean et al. 2022	1015.49		6.6877	9.8521	0.52352	0.746	0.8858	4.5464	5.4598	5.5827	95.3926	137.142	176.081	5.2683	5.8069	6.082	0.3277	0.5127	0.6171	6.4728	4.2812	3.6457	0.057	49.361	43.9432	0.8898	-2.4781	0.4087	0.2777	1.3732	6.7571	6.9484	5.708	6.3578	6.3932	4.4808	0.3552	-0.6162	-0.0992	-1.1138	-0.8877	1.1447	15.0762	7.281	1.4679	4.4643	9.2103	5.6697
S009WTS060	Codilean et al. 2022	32872.1		3.2104	9.4485	0.10015	0.1966	0.286	3.1764	4.8286	4.9149	18.098	29.0393	42.0749	3.6166	4.1349	4.419	0.0571	0.1034	0.1491	6.6043	4.3819	3.6756	-0.0671	21.198	33.4312	1.1807	-2.275	0.6293	0.277	1.3831	6.8413	6.8959	4.8216	5.2168	6.0072	3.8577	0.7906	-1.2859	-1.2542	-1.7826	-1.7579	0.4854	60.908	5.035	2.8612	4.5691	9.2103	4.6728
S009WTS047	Codilean et al. 2022	18374.3		3.7921	9.4512	0.07204	0.22	0.3317	3.3417	4.882	4.9735	21.3269	34.2408	51.3222	3.9079	4.4064	4.6121	0.0657	0.1177	0.1738	6.4674	4.3691	3.6585	-0.1131	28.519	40.8897	1.164	-2.331	0.6038	0.2746	1.3587	6.7865	6.8852	4.8057	5.2714	5.9932	3.899	0.6799	-1.152	-1.1184	-1.6756	-1.6482	0.5056	71.3026	4.227	2.4779	4.6739	9.2103	4.7383
S230WTS006	Codilean et al. 2022	479.652		7.4378	9.6417	0.37985	0.7317	0.8983	4.3716	5.3792	5.5571	79.8089	125.804	167.817	5.4501	5.9552	6.404	0.2806	0.515	0.651	4.8787	3.922	3.1475	-0.1967	0.112	6.2373	0.258	-1.1878	0.0742	0.2054	1.2979	6.5367	6.3181	5.5794	6.8185	6.4608	5.0938	-1.2508	0.0271	0.0705	-0.4785	-0.4508	2.1567	29.9827	7.05	3.0392	6.521	13.1089	6.0456
S102WTS005	Codilean et al. 2022	20352.1		3.6899	9.7266	0.21276	0.472	0.6295	3.7049	5.0401	5.1592	36.3543	65.1087	87.7534	3.4018	3.7664	4.0476	0.1339	0.272	0.3762	5.6189	3.7393	3.2037	-1.0958	0	3.0273	0.191	-0.9426	0.1043	0.214	1.2546	5.8082	5.7383	1.2961	2.3362	4.6712	2.45	-2.355	-0.6761	-0.1497	-1.1884	-0.8447	0.7153	9.0181	8.835	3.4301	4.1148	9.2103	5.9098
S230WTS007	Codilean et al. 2022	507.653		7.381	9.6221	0.38097	0.7335	0.9001	4.3657	5.3751	5.5536	79.8458	125.898	167.778	5.4338	5.9112	6.4028	0.2815	0.5167	0.6521	4.8818	3.9203	3.1468	-0.1908	0.114	6.351	0.2513	-1.1803	0.0715	0.2055	1.2997	6.5381	6.3152	5.5458	6.7951	6.4489	5.0901	-1.2558	0.0242	0.0667	-0.4821	-0.4548	2.1552	30.4649	7.033	3.0497	6.532	13.1271	6.0495
S127WTS055	Codilean et al. 2022	6589.31		4.8176	10.0173	0.27162	0.4986	0.6347	4.067	5.1971	5.3538	54.067	83.5654	112.787	4.608	5.0468	5.4548	0.1714	0.2976	0.3826	6.5274	4.2368	3.747	-0.777	7.451	2.8084	0.3972	-2.0062	0.2523	0.2405	1.3322	6.554	6.4512	4.204	5.5352	5.267	3.6683	-1.1147	-0.8926	-0.8484	-1.3548	-1.3104	1.172	7.3959	6.799	0.1514	2.7109	9.2103	4.6056
S218WTS002	Codilean et al. 2022	152318		1.6771	9.9733	0.03255	0.0533	0.1762	2.8683	4.7263	4.8027	10.5761	17.5356	28.763	2.772	3.0021	3.2526	0.0194	0.0288	0.0757	6.0433	4.2689	3.7269	-1.4347	2.176	5.4632	0.4486	-2.0333	0.2581	0.1529	1.0779	6.0853	6.166	0.2374	1.7364	4.6234	2.3685	-1.8455	-1.8018	-1.6874	-2.0891	-2.028	0.2705	63.0361	5.754	3.6318	2.3026	9.2103	4.6052
S220WTS007	Codilean et al. 2022	4400.58		5.2213	9.4899	0.26145	0.4585	0.5674	3.7556	5.032	5.136	42.7097	65.857	85.9638	4.6784	5.181	5.5119	0.1602	0.2746	0.3475	7.4862	4.6468	3.6729	-0.0116	97.146	83.8869	1.4439	-3.7255	0.626	0.1778	1.2238	7.1666	7.2129	5.8146	6.6001	6.7953	5.0304	1.0962	-0.6681	-0.6632	-1.4439	-1.4427	1.026	64.7421	4.585	2.4196	5.9736	9.2103	4.9145
S023WTS001	Codilean et al. 2022	19004.2		3.7584	9.6837	0.05523	0.1353	0.2556	3.2208	4.8192	4.9399	16.3977	26.9848	42.376	3.1211	3.481	3.8866	0.0458	0.0826	0.1485	5.6423	3.9908	3.422	-1.3317	10.461	9.8895	0.3685	-2.3076	0.1937	0.1614	1.1023	5.9923	5.8902	1.9374	3.154	4.7322	2.6216	-2.1714	-1.446	-1.2605	-1.9146	-1.7952	0.5992	13.3669	7.018	3.1404	3.4821	9.2103	5.1121
S148WTS008	Codilean et al. 2022	1104.69		6.6035	9.6251	0.40891	0.7226	0.8833	4.5676	5.4957	5.6697	84.7196	127.575	169.714	5.0107	5.6685	5.8334	0.3101	0.5124	0.6268	4.6579	3.6982	3.0792	-0.7808	0	17.2657	0.1786	-1.2733	0.0438	0.2034	1.3079	6.0631	5.5783	3.8172	5.1791	5.2686	3.6936	-2.4098	-0.2521	-0.202	-0.7491	-0.699	1.7445	80.4065	4.241	2.9309	5.6928	12.1646	6.0796
S137WTS003	Codilean et al. 2022	850.262		6.8653	9.3616	0.39303	0.6756	0.8659	4.3151	5.3601	5.5179	77.3189	122.174	165.151	5.0283	5.6055	5.8541	0.2838	0.4982	0.6279	6.6973	4.4441	3.6019	0.3424	29.679	45.8405	0.9454	-2.0907	0.4123	0.2664	1.372	7.2149	7.1007	5.2024	5.9096	6.3779	4.5154	0.7127	-1.0013	-0.9613	-1.5015	-1.471	0.7474	27.8763	7.873	3.7926	6.1243	9.9282	5.6202
S071WTS020	Codilean et al. 2022	5830.29		4.94	9.7274	0.33716	0.5646	0.6752	3.8589	5.0927	5.2184	51.7813	76.562	98.0323	4.4648	4.8151	5.2117	0.1948	0.3135	0.3978	6.3852	4.0112	3.3875	-0.3008	5.444	6.7575	0.4471	-1.8128	0.241	0.2642	1.4486	6.5433	6.6515	4.619	5.6587	5.6686	3.9901	-0.6094	-0.9268	-0.7599	-1.3716	-1.2648	0.8746	5.2316	8.66	3.3806	4.5372	9.2723	5.8725
S071WTS021	Codilean et al. 2022	6245.88		4.8711	9.7274	0.33716	0.5646	0.6752	3.8589	5.0927	5.2184	51.7813	76.562	98.0323	4.4648	4.8151	5.2117	0.1948	0.3135	0.3978	6.3852	4.0112	3.3875	-0.3008	5.444	6.7575	0.4471	-1.8128	0.241	0.2642	1.4486	6.5433	6.6515	4.619	5.6587	5.6686	3.9901	-0.6094	-0.9268	-0.7599	-1.3716	-1.2648	0.8746	5.2316	8.66	3.3806	4.5372	9.2723	5.8725
S137WTS004	Codilean et al. 2022	2281.23		5.8784	9.3842	0.31038	0.5647	0.7335	3.9297	5.1612	5.3205	55.2814	90.5829	124.233	4.5914	5.1073	5.6046	0.2094	0.3819	0.4998	6.8352	4.4507	3.6084	-0.0028	28.329	52.8305	0.9077	-2.0349	0.4253	0.2606	1.3421	7.0052	6.8926	4.9772	5.6119	6.1769	4.2357	0.305	-1.066	-1.0024	-1.5606	-1.5105	0.6962	5.3848	9.126	3.9279	5.5812	9.3427	5.3443
S235WTS003	Codilean et al. 2022	5308.79		5.0337	9.787	0.15499	0.3607	0.5402	3.5889	4.9864	5.1293	33.0472	58.5608	84.8476	3.8458	4.3236	4.7245	0.1056	0.2164	0.3197	6.2764	4.3968	3.672	-1.5694	0	1.0183	0.1878	-1.0399	0.1475	0.1688	1.23	5.8843	6.1751	4.1685	5.4692	5.3655	3.7923	-2.2288	-0.3614	-0.2542	-0.8766	-0.7631	1.4848	0.2202	10.58	4.2372	4.9596	9.2103	4.6335
S164WTS076	Codilean et al. 2022	87907.2		2.2268	9.9997	0.05756	0.1142	0.2246	2.8143	4.6947	4.7675	11.6335	19.1386	39.4202	3.5181	3.7934	4.3377	0.0295	0.0421	0.105	8.0665	4.8239	4.4199	-0.1272	22.483	28.9061	1.0617	-2.1078	0.5006	0.2455	1.2313	7.305	7.32	5.2594	6.6246	5.9254	4.5878	0.773	-1.461	-1.37	-1.865	-1.7982	0.1321	99.5573	2.008	0	2.3026	9.2103	4.6052
S111WTS009	Codilean et al. 2022	868.652		6.8439	9.8072	0.49227	0.7043	0.8703	4.7166	5.5401	5.7356	96.574	136.733	185.938	6.0526	6.4807	6.9195	0.3188	0.4882	0.6077	6.4557	5.1347	4.379	0.0547	27.671	45.1127	0.8758	-2.2405	0.3991	0.2615	1.3951	7.1928	7.5907	6.605	7.8031	7.2272	5.879	0.8792	-0.0759	-0.0657	-0.6722	-0.6505	1.7241	84.2587	3.703	1.2388	6.1615	11.1113	5.3669
S023WTS002	Codilean et al. 2022	24905.3		3.488	9.6385	0.03016	0.137	0.2559	3.2269	4.8239	4.9459	16.4939	27.2263	42.408	3.1265	3.5086	3.8985	0.0462	0.0839	0.1488	5.6486	3.9891	3.4231	-1.3236	10.935	10.3052	0.3685	-2.3126	0.1958	0.1612	1.1017	5.9981	5.8929	1.9018	3.146	4.7333	2.6318	-2.1575	-1.4576	-1.2748	-1.9214	-1.8048	0.5886	13.7227	6.87	3.0536	3.4828	9.2103	5.1292
S023WTS004	Codilean et al. 2022	13427.3		4.1058	9.6055	0.04079	0.1384	0.257	3.2309	4.8271	4.9514	16.5706	27.3868	42.6808	3.1303	3.5172	3.9059	0.0466	0.0847	0.1492	5.6536	3.988	3.4239	-1.3183	11.296	10.6461	0.3748	-2.3167	0.1971	0.1614	1.1026	6.0016	5.8947	1.9018	3.146	4.7373	2.6411	-2.1485	-1.4666	-1.2823	-1.9269	-1.8103	0.5808	14.1025	6.764	3.0083	3.486	9.2103	5.1409
S074WTS003	Codilean et al. 2022	1403.33		6.3642	10.0012	0.2023	0.4652	0.6627	3.8819	5.2046	5.4024	51.859	92.8031	129.36	4.872	5.565	6.0179	0.1155	0.2677	0.391	8.3943	5.0852	4.4793	1.0085	75.819	87.5337	1.4713	-2.5575	0.5934	0.2846	1.3943	8.0159	8.0507	7.381	7.645	7.7776	5.5395	2.5073	-0.1031	-0.0896	-0.6522	-0.6302	1.2191	26.1561	6.843	3.0196	6.9689	9.5119	4.6093
S206WTS001	Codilean et al. 2022	20709		3.6725	9.7206	0.23637	0.4503	0.6041	4.0967	5.2162	5.3937	49.7931	79.9584	114.022	3.7835	4.2351	4.7053	0.1633	0.2927	0.3999	5.5125	4.0925	3.3972	-1.716	0	0.2359	0.077	-0.8928	0.0725	0.1851	1.2403	5.4233	5.0051	1.8145	2.8683	4.7144	2.5433	-3.5394	-0.0051	0.0423	-0.5324	-0.4871	1.2854	50.1747	6.374	3.0274	5.2473	10.1411	5.8765
S120WTS010	Codilean et al. 2022	204749		1.3813	9.9834	0.05826	0.1086	0.1516	2.5708	4.6475	4.6885	7.155	10.9905	22.6092	3.4215	3.4875	4.2906	0.0178	0.0267	0.0435	8.3728	4.9186	4.5593	0.3408	68.565	97.168	1.4545	-2.5996	0.6022	0.2745	1.1891	7.4626	7.374	5.9149	6.9858	6.4571	4.9328	1.441	-2.0915	-2.025	-2.2027	-2.1681	0.4125	100	2	0	2.3026	9.2103	4.6052
S120WTS011	Codilean et al. 2022	157926		1.6409	9.9834	0.05826	0.1086	0.1516	2.5708	4.6475	4.6885	7.155	10.9905	22.6092	3.4215	3.4875	4.2906	0.0178	0.0267	0.0435	8.3728	4.9186	4.5593	0.3408	68.565	97.168	1.4545	-2.5996	0.6022	0.2745	1.1891	7.4626	7.374	5.9149	6.9858	6.4571	4.9328	1.441	-2.0915	-2.025	-2.2027	-2.1681	0.4125	100	2	0	2.3026	9.2103	4.6052
S074WTS002	Codilean et al. 2022	1380.93		6.3803	9.9854	0.2052	0.4687	0.6648	3.8938	5.2084	5.4044	51.9293	92.8417	129.459	4.884	5.5715	6.0244	0.1172	0.2698	0.3921	8.3871	5.0856	4.4747	1.0096	75.611	87.4967	1.4713	-2.5523	0.5926	0.2838	1.3891	8.0162	8.0525	7.3677	7.6266	7.7799	5.5369	2.5076	-0.0908	-0.0821	-0.6409	-0.6234	1.2237	26.5701	6.766	2.9586	6.9689	9.516	4.6094
S148WTS005	Codilean et al. 2022	19165.1		3.75	9.5075	0.26693	0.5611	0.6731	3.6829	4.9968	5.0852	44.6602	72.0755	89.833	3.5364	3.8751	4.2652	0.1856	0.3398	0.4288	4.745	3.5337	3.1008	-1.4954	0	6.8048	0.1058	-1.1065	0.0688	0.2045	1.2269	5.406	5.4522	2.3339	3.5198	4.8202	2.8006	-2.9975	-0.5072	-0.3242	-0.9926	-0.8576	1.7673	19.0674	8.58	4.0938	4.5032	10.2917	5.9878
S045WTS011	Codilean et al. 2022	3585.13		5.4263	9.6873	0.5282	0.7622	0.9026	4.4895	5.4198	5.5258	91.1373	134.714	171.738	5.3809	5.892	6.1109	0.3244	0.5227	0.623	6.7807	4.1128	3.5015	-0.3816	26.766	31.8499	0.4726	-2.1542	0.2128	0.278	1.4697	6.4816	6.6936	5.9833	6.8311	6.7711	5.0631	-0.7084	-1.1175	-0.1381	-1.4988	-0.8776	1.2873	50.3725	6.116	1.4901	4.6615	11.6633	5.8697
S009WTS029	Codilean et al. 2022	49001.8		2.8112	9.1283	0.01715	0.1355	0.2105	2.756	4.7002	4.7425	10.4073	16.6032	22.8712	3.0616	3.3526	3.6061	0.0387	0.066	0.0971	6.7401	4.226	3.4496	0.1197	30.348	43.6404	1.1321	-2.3351	0.6065	0.2774	1.438	6.8882	6.9518	4.7003	5.1888	6.1583	4.0925	0.9215	-1.814	-1.7608	-2.0379	-2.0069	0.3619	0	10.625	4.4066	2.3026	9.2103	4.6052
S148WTS009	Codilean et al. 2022	1382.62		6.3791	9.5131	0.40096	0.7182	0.88	4.5397	5.4854	5.6761	82.9391	125.764	168.293	4.9748	5.6695	5.8349	0.3041	0.5089	0.6264	4.6426	3.6839	3.0745	-0.799	0	16.4721	0.098	-1.2972	0.0415	0.2036	1.299	6.0322	5.5325	3.7275	5.1334	5.2791	3.7432	-2.4689	-0.2527	-0.1983	-0.7487	-0.6951	1.6629	79.412	4.375	3.0317	5.6482	12.2376	6.0838
S023WTS005	Codilean et al. 2022	9996.32		4.4008	9.5557	0.02795	0.1414	0.2603	3.2409	4.8304	4.9598	16.7925	27.7853	43.0977	3.1372	3.5232	3.9208	0.0475	0.0864	0.1511	5.6592	3.9874	3.4261	-1.3082	11.864	11.1807	0.3942	-2.3218	0.1999	0.1612	1.1017	6.0093	5.8988	1.8374	3.1429	4.7354	2.6547	-2.13	-1.4793	-1.2997	-1.9352	-1.8226	0.5697	14.4301	6.604	2.9048	3.4879	9.2103	5.1605
S074WTS015	Codilean et al. 2022	1144.73		6.5679	9.9353	0.2145	0.4799	0.6717	3.932	5.2185	5.4114	52.375	93.2128	129.715	4.923	5.5994	6.0502	0.1229	0.2768	0.3968	8.3686	5.0826	4.4642	1.0087	74.854	87.1748	1.4573	-2.5383	0.5901	0.2817	1.3775	8.012	8.0479	7.3011	7.5532	7.7639	5.5143	2.4965	-0.0621	-0.0565	-0.6151	-0.6004	1.2461	27.9288	6.653	2.8506	6.9689	9.5293	4.6096
S220WTS009	Codilean et al. 2022	8253.82		4.5924	9.2894	0.26556	0.4497	0.5604	3.5793	4.9801	5.064	37.309	56.7468	73.3824	4.3645	4.8351	5.198	0.1469	0.2357	0.2983	7.476	4.6636	3.6597	0.1551	97.375	83.6269	1.436	-3.6969	0.6677	0.2073	1.2577	7.2955	7.2436	5.6402	6.3349	6.817	4.9685	1.3583	-0.735	-0.7074	-1.4974	-1.4934	0.9297	38.306	5.869	2.391	6.1565	9.2103	4.8704
S156WTS010	Codilean et al. 2022	89060.1		2.2138	9.0831	0.06096	0.1045	0.1794	2.7105	4.6874	4.7565	9.3651	14.592	33.578	3.3515	3.795	4.3026	0.0255	0.0342	0.0658	7.5977	4.8741	4.2847	0.093	89.962	80.076	1.1636	-3.5579	0.5858	0.2633	1.4184	7.3222	7.3223	5.0736	5.8344	6.5014	4.6959	1.165	-1.6623	-1.5673	-1.9791	-1.9187	0.3817	97.3631	2.001	0	2.3026	9.2103	4.6052
S009WTS025	Codilean et al. 2022	7766.13		4.6533	8.6306	0.05021	0.2015	0.3212	3.0435	4.7689	4.823	17.1454	27.3113	39.6011	3.5605	3.9226	4.0965	0.0579	0.103	0.1611	6.8498	4.3097	3.5072	0.1591	38.676	48.1107	1.1402	-2.4453	0.5644	0.2909	1.4636	6.9045	6.8765	4.2496	4.9772	6.19	4.3302	0.7772	-0.9951	-0.9431	-1.4925	-1.4486	0.6441	0.4083	8.483	3.4406	4.3624	9.2103	5.0454
S074WTS014	Codilean et al. 2022	1787.57		6.1222	9.9181	0.2179	0.4837	0.6742	3.9448	5.2224	5.4142	52.482	93.2576	129.83	4.9365	5.6101	6.054	0.125	0.279	0.3988	8.3608	5.0806	4.4569	1.0077	74.692	87.0593	1.4482	-2.5358	0.589	0.2808	1.372	8.0097	8.0438	7.29	7.5438	7.7697	5.5218	2.4893	-0.0496	-0.0458	-0.6039	-0.5911	1.2502	28.4129	6.605	2.8337	6.9689	9.5341	4.6097
S135WTS021	Codilean et al. 2022	4942.08		5.1053	9.9063	0.27643	0.4952	0.6583	4.2946	5.3489	5.4916	59.2242	94.0518	131.326	5.2614	5.8613	6.1901	0.1831	0.3154	0.4099	6.8429	4.6386	4.3071	0.1507	49.618	38.5495	1.2602	-2.4557	0.5402	0.254	1.2837	7.3424	7.5103	6.1873	6.7686	6.7588	4.8031	1.2513	-0.4515	-0.4074	-0.8587	-0.8149	1.3659	12.0586	6.628	1.8467	6.7602	9.2103	4.6059
S064WTS004	Codilean et al. 2022	884.271		6.8261	9.551	0.4862	0.7084	0.8435	4.4373	5.4008	5.5207	86.2002	124.438	161.88	5.1418	5.6697	5.971	0.2993	0.468	0.5725	6.4953	4.2746	3.6373	0.0306	47.66	41.2207	0.8964	-2.4616	0.4086	0.2765	1.3583	6.7514	6.9238	5.3365	5.9434	6.3335	4.3794	0.3137	-0.5938	-0.0595	-1.0969	-0.8644	1.1819	12.0575	7.489	1.6804	4.4673	9.2103	5.677
S235WTS004	Codilean et al. 2022	16600.1		3.8937	9.6181	0.15352	0.3564	0.5372	3.6172	4.9998	5.1411	33.5897	59.6983	86.8208	3.8363	4.3281	4.745	0.1061	0.2198	0.325	6.2173	4.3751	3.6406	-1.5664	0	1.1336	0.1912	-1.0561	0.1515	0.168	1.2171	5.882	6.1885	4.0227	5.3083	5.3773	3.7976	-2.2045	-0.3423	-0.237	-0.8611	-0.7504	1.4498	0	10.486	4.2003	4.9596	9.2103	4.6386
S235WTS011	Codilean et al. 2022	16449.3		3.9028	9.6158	0.15364	0.3566	0.5374	3.6178	5.0003	5.1412	33.621	59.7661	86.8566	3.835	4.3256	4.7456	0.1062	0.22	0.3252	6.2165	4.3751	3.6406	-1.5664	0	1.136	0.1912	-1.0564	0.1515	0.168	1.2171	5.882	6.1889	4.0227	5.3083	5.3785	3.7993	-2.2042	-0.3423	-0.237	-0.8611	-0.7504	1.4479	0	10.485	4.2002	4.9596	9.2103	4.6387
S258WTS002	Codilean et al. 2022	6389.37		4.8484	9.8674	0.27375	0.4999	0.6394	4.1076	5.2128	5.3395	52.3661	82.194	111.147	5.0123	5.5368	5.8135	0.158	0.2757	0.3568	6.8648	4.7006	4.2465	0.3913	37.884	56.9454	1.1732	-2.1946	0.5268	0.2611	1.3175	7.4993	7.5007	6.1745	6.4963	6.7818	4.5909	1.3915	-0.4189	-0.3783	-0.9859	-0.9414	1.4232	51.9063	5.421	3.1291	4.3845	9.3714	4.6052
S124WTS002	Codilean et al. 2022	12311.5		4.1925	8.9257	0.28287	0.5426	0.679	3.9465	5.1262	5.225	53.7614	84.1432	107.853	4.9824	5.4747	5.7191	0.2025	0.3505	0.4435	7.3283	5.2366	4.0879	0.2734	51.304	46.945	1.0436	-2.4124	0.4599	0.2106	1.3626	7.4105	7.0772	5.7344	6.4504	7.2302	5.4172	0.7641	-0.0178	0.0136	-0.627	-0.5933	1.1977	63.8643	6.408	3.5628	6.6854	9.9267	5.4105
S188WTS025	Codilean et al. 2022	11808.4		4.2343	9.3761	0.36336	0.6431	0.8017	4.6769	5.5355	5.739	87.6595	137.236	190.919	5.7087	6.1569	6.4907	0.2621	0.4519	0.5822	5.4972	4.1804	3.7373	-0.4813	6.485	3.3798	0.5214	-2.0818	0.2637	0.2438	1.3448	6.4675	6.3687	5.1822	6.1204	6.3493	4.6921	-0.9303	-0.095	-0.0874	-0.6457	-0.6321	1.5385	45.6438	6.706	2.9124	6.558	11.1888	4.6727
S009WTS050	Codilean et al. 2022	14412.8		4.0349	8.6966	0.13704	0.2605	0.3775	3.4784	4.9159	4.9931	24.4302	38.3885	56.7107	4.1042	4.4997	4.7341	0.0807	0.1346	0.1926	6.5088	4.4055	3.6924	-0.0696	30.686	44.0694	1.1754	-2.3795	0.5967	0.274	1.3421	6.8288	6.9097	4.1689	4.6462	6.0761	3.9962	0.7156	-1.199	-1.1852	-1.7148	-1.7021	0.5122	80.59	3.523	1.7169	4.6839	9.2103	4.8428
S156WTS001	Codilean et al. 2022	162655		1.6114	8.933	0.08925	0.1679	0.3083	2.8549	4.7282	4.8149	14.7499	28.9915	44.0211	3.3618	3.7128	4.0133	0.043	0.0747	0.1657	7.394	4.8167	4.1907	-0.0705	90.577	67.0279	1.1173	-3.6613	0.6017	0.2653	1.4529	7.0813	7.1058	4.6195	5.4866	6.2478	4.5164	0.8961	-1.7131	-1.6503	-2.0699	-2.0371	0.3407	69.6528	3.103	1.7315	4.1714	9.2103	4.6088
S127WTS056	Codilean et al. 2022	4770.8		5.1406	9.2719	0.2748	0.5	0.631	4.0778	5.2037	5.3564	53.8069	83.9064	112.809	4.4711	4.9562	5.3456	0.1737	0.3008	0.3859	6.6068	4.1447	3.7078	-0.9068	3.953	0.4067	0.3309	-1.9386	0.2204	0.2435	1.3552	6.4011	6.3343	3.2421	4.7426	5.1659	3.6297	-1.3971	-0.8104	-0.7576	-1.2801	-1.2259	1.1618	15.4372	6.433	0	2.7109	9.2103	4.6061
S074WTS013	Codilean et al. 2022	1287.57		6.4503	9.8661	0.2274	0.4949	0.6814	3.9842	5.2334	5.4208	53.1197	93.7437	130.233	4.9779	5.6289	6.0691	0.1312	0.2861	0.4041	8.3387	5.0732	4.4404	1.0033	74.202	86.7182	1.4391	-2.527	0.5862	0.2772	1.3532	8.0013	8.0313	7.202	7.4626	7.735	5.4935	2.468	-0.0128	-0.0148	-0.5709	-0.5637	1.2683	29.9218	6.414	2.7583	6.9689	9.5486	4.6099
S120WTS009	Codilean et al. 2022	282951		1.0578	9.862	0.05486	0.1029	0.1378	2.489	4.6432	4.67	4.6113	6.9385	14.5028	3.1113	3.3049	3.9769	0.0167	0.0253	0.0376	8.3019	4.9164	4.5569	0.3216	70.993	96.8719	1.4565	-2.6187	0.6062	0.2749	1.178	7.4469	7.355	5.73	6.7769	6.4034	4.8513	1.4205	-2.1153	-2.0518	-2.2091	-2.1751	0.4125	100	2	0	2.3026	9.2103	4.6052
S064WTS010	Codilean et al. 2022	2428.19		5.8159	9.5024	0.4831	0.7042	0.8381	4.4073	5.3813	5.4933	84.8115	122.45	158.57	5.1038	5.6047	5.9041	0.2956	0.4622	0.5655	6.4956	4.2564	3.617	0.0233	46.295	40.8563	0.902	-2.4396	0.4031	0.275	1.3595	6.7486	6.916	5.2685	5.8604	6.3172	4.349	0.2871	-0.6068	-0.0811	-1.1084	-0.8807	1.1898	11.8792	7.521	1.6725	4.4785	9.2103	5.6872
S091WTS005	Codilean et al. 2022	19702.6		3.7223	8.9036	0.05582	0.1086	0.2025	3.0448	4.7829	4.9036	17.0139	28.4255	49.5949	3.1208	3.4331	3.7463	0.0394	0.0727	0.1339	6.125	4.1383	3.2947	-1.2076	0.05	0.0288	0.313	-2.1884	0.2234	0.2339	1.3108	5.7602	5.4576	1.7857	3.0673	4.8298	2.86	-2.3704	-0.2358	-0.1391	-0.9396	-0.8065	1.2263	14.179	8.581	2.2919	4.236	9.2204	5.4569
S156WTS005	Codilean et al. 2022	164626		1.5994	9.406	0.06878	0.1244	0.2697	2.8088	4.7055	4.8396	14.2881	29.9301	48.3892	3.3828	3.6665	4.4972	0.0318	0.0442	0.1329	7.4769	4.852	4.2721	-0.0269	91.073	72.4883	1.1815	-3.6929	0.6027	0.2529	1.4045	7.1847	7.1965	5.2055	5.8346	6.3441	4.4102	1.0097	-1.6059	-1.4997	-1.9966	-1.9331	0.483	98.0324	2.107	0.0599	4.6608	9.2103	4.6184
S188WTS006	Codilean et al. 2022	6377.37		4.8503	9.7334	0.22639	0.4718	0.6747	4.3597	5.4136	5.6934	59.2503	101.064	159.329	5.2016	5.5703	6.0915	0.1599	0.3041	0.4668	5.6461	3.9653	3.3866	-0.897	0.211	1.5454	0.3163	-1.3348	0.1719	0.234	1.3406	6.2805	6.2453	4.5708	5.7441	5.6335	4.0552	-1.5924	0.2122	0.211	-0.3348	-0.3191	1.4106	60.3191	5.611	3.1141	4.2358	9.2103	4.7715
S009WTS048	Codilean et al. 2022	20362.3		3.6894	9.098	0.07389	0.2459	0.3553	3.4371	4.9079	4.9929	23.4797	37.2232	54.7041	4.0243	4.4559	4.6353	0.0761	0.1321	0.1887	6.5012	4.3884	3.6825	-0.1042	32.616	45.8155	1.1732	-2.3871	0.5991	0.2745	1.3452	6.7956	6.8954	4.4765	4.9601	6.0088	3.9298	0.6832	-1.1492	-1.1258	-1.6734	-1.6534	0.5152	74.2089	3.983	2.2205	4.6713	9.2103	4.7858
S136WTS005	Codilean et al. 2022	22350.5		3.5962	9.0902	0.12716	0.2462	0.3557	3.4384	4.9081	4.9931	23.511	37.2723	54.7716	4.0258	4.4565	4.6355	0.0762	0.1322	0.1888	6.502	4.3882	3.6825	-0.1041	32.609	45.7809	1.178	-2.3871	0.599	0.2747	1.3444	6.7958	6.8956	4.474	4.9575	6.0127	3.9339	0.6832	-1.1492	-1.127	-1.6734	-1.6544	0.5152	74.3347	3.973	2.2088	4.673	9.2103	4.7855
S148WTS010	Codilean et al. 2022	1128.39		6.5823	9.3029	0.3802	0.6964	0.8492	4.4465	5.4248	5.6462	77.2067	117.379	158.414	4.8322	5.4545	5.7827	0.2853	0.482	0.5999	4.6339	3.646	3.0648	-0.9034	0	15.3345	0	-1.3001	0.044	0.2034	1.2794	5.9328	5.4901	3.5225	4.9326	5.2808	3.7491	-2.5783	-0.2572	-0.1903	-0.7504	-0.6864	1.6165	75.7623	4.728	3.1857	5.4729	12.1863	6.0834
S126WTS002	Codilean et al. 2022	3915.53		5.3381	9.6625	0.28138	0.5596	0.7374	4.5773	5.5816	5.8707	71.2633	124.002	193.466	5.4178	5.9325	6.4855	0.1892	0.3751	0.5458	5.5541	4.0766	3.5234	-0.7641	0.133	1.4624	0.3431	-1.3835	0.1737	0.2334	1.3239	6.4329	6.332	4.5366	5.652	5.6569	4.0374	-1.412	0.2224	0.2602	-0.3524	-0.3072	1.5292	63.8479	5.361	3.35	4.7785	9.2103	4.9161
S026WTS020	Codilean et al. 2022	11774.3		4.2371	8.7651	0.11595	0.2164	0.306	3.0702	4.7715	4.8033	17.7992	26.7921	36.2544	3.6786	3.9982	4.1364	0.07	0.1159	0.1584	6.9951	4.5685	3.9627	-0.0113	84.829	60.733	1.108	-3.4738	0.5542	0.2894	1.4824	6.9001	6.924	4.3921	5.6962	6.1982	4.8566	0.6615	-1.8878	-1.8905	-2.1379	-2.1379	0.2345	0	5.163	0	4.8282	9.2103	5.4679
S025WTS016	Codilean et al. 2022	6153.9		4.886	9.296	0.40419	0.6569	0.8033	4.4867	5.4828	5.6152	80.0942	126.486	170.68	5.224	5.7457	6.1274	0.2469	0.4262	0.5293	7.4552	4.6712	4.176	-0.0871	49.214	56.5104	1.3005	-2.3991	0.5183	0.2637	1.3759	7.146	7.1296	4.6525	5.5869	5.9937	4.2894	0.6864	-0.5946	-0.5886	-1.0895	-1.0759	1.1606	1.5752	6.711	1.8711	6.3317	9.5834	4.6183
S025WTS047	Codilean et al. 2022	2250.98		5.8917	9.2444	0.44934	0.6977	0.8309	4.7017	5.513	5.6737	97.2438	138.673	187.649	5.052	5.4529	5.717	0.3073	0.4759	0.5669	7.0107	4.4035	3.9144	-0.4366	33.793	30.8108	1.0127	-2.1646	0.3796	0.2581	1.363	6.8108	6.8702	3.5999	4.8013	5.3495	3.6935	-0.164	-0.6888	-0.704	-1.1555	-1.1638	1.181	6.014	6.756	0.1158	4.915	9.7168	4.7039
S026WTS011	Codilean et al. 2022	90044.2		2.2028	7.5258	0.12881	0.2359	0.3458	2.9734	4.7711	4.8183	17.891	29.4299	39.393	3.6288	4.0221	4.2334	0.0728	0.1363	0.1996	7.0188	4.5872	4.0581	-0.0315	78.184	66.7888	1.119	-3.361	0.5561	0.2832	1.4988	6.9831	7.0205	3.3115	4.567	6.2962	4.9242	0.7338	-1.9618	-1.9654	-2.1637	-2.1663	0.211	3.2782	6.692	2.7201	4.5825	9.2103	5.3393
S188WTS015	Codilean et al. 2022	9496.56		4.4521	8.0147	0.35448	0.6278	0.7505	4.7835	5.6148	5.7729	84.3623	130.648	192.482	5.5076	6.0486	6.2952	0.245	0.4192	0.5368	4.9465	3.8957	3.3406	-0.8615	0.071	0.0184	0.3353	-1.603	0.2133	0.2242	1.2794	6.2654	6.021	2.5676	3.7552	5.4446	3.8164	-1.6497	0.07	0.0876	-0.527	-0.509	1.7006	79.9112	4.23	2.9128	4.1739	9.2103	4.6265
S086WTS018	Codilean et al. 2022	231.863		8.1647	7.8011	0.59891	0.7496	0.9439	4.9371	5.6527	5.9145	116.737	162.869	231.56	6.6354	6.9757	7.8382	0.3641	0.5741	0.7185	5.242	4.6806	3.946	-0.4334	13.95	17.5167	0.7407	-2.132	0.1488	0.2652	1.4102	6.4644	7.3455	4.7493	5.984	7.335	6.0273	-0.3557	-0.1572	-0.1849	-0.7702	-0.7737	1.527	99.5501	2.892	0.0862	6.5011	12.8367	5.9382
S082WTS009	Codilean et al. 2022	969.404		6.7341	7.8732	0.26832	0.4731	0.597	4.1627	5.2171	5.3298	52.2157	82.5173	109.791	4.6571	5.1684	5.4071	0.1787	0.2998	0.3938	6.4447	4.1826	3.644	-1.6608	0	0.9785	0.1118	-1.4188	0.1102	0.2481	1.3614	5.6115	6.3942	2.65	3.6891	5.575	3.8719	-2.2078	-0.7557	-0.7079	-1.2434	-1.1996	1.0273	67.5415	4.822	3.203	3.8118	9.2103	4.7345
S076WTS021	Codilean et al. 2022	312.129		7.8674	7.8053	0.45041	0.668	0.8403	4.7385	5.507	5.759	92.0704	133.071	179.033	6.162	6.4325	7.1212	0.2995	0.4797	0.6046	5.8529	4.8071	4.0054	-0.3208	16.658	25.1978	0.843	-1.6961	0.2094	0.2668	1.4238	6.7095	7.542	4.5961	5.8243	7.1888	5.8679	0.0567	-0.3144	-0.1887	-0.8778	-0.7722	1.6706	62.332	4.433	2.4798	6.3044	11.1906	5.8343
S235WTS017	Codilean et al. 2022	15211.9		3.981	9.4511	0.15144	0.3528	0.534	3.6389	5.0155	5.1529	33.9023	60.6805	89.1127	3.848	4.3298	4.7393	0.1052	0.2204	0.3259	6.1882	4.3592	3.6219	-1.5658	0	1.1863	0.1935	-1.07	0.1521	0.1669	1.2046	5.8765	6.1999	3.9127	5.185	5.4077	3.8307	-2.1928	-0.3498	-0.2408	-0.8623	-0.7482	1.4241	0	10.565	4.2243	4.9596	9.2103	4.6445
S123WTS003	Codilean et al. 2022	3291.2		5.5118	9.6426	0.28278	0.5589	0.7373	4.5782	5.5836	5.8692	71.1333	123.664	193.52	5.4278	5.9546	6.4886	0.1896	0.3734	0.5429	5.5614	4.085	3.5333	-0.7486	0.136	1.4923	0.3431	-1.4081	0.1758	0.2346	1.3246	6.4494	6.3453	4.5366	5.6503	5.6698	4.0524	-1.3833	0.217	0.2548	-0.356	-0.3109	1.5236	64.7241	5.286	3.323	4.7785	9.2103	4.9215
S235WTS005	Codilean et al. 2022	16136.6		3.922	9.4475	0.15149	0.3527	0.5337	3.6388	5.0159	5.1533	33.8862	60.626	89.1533	3.843	4.3294	4.7136	0.1053	0.2203	0.3258	6.1878	4.3574	3.62	-1.5657	0	1.1865	0.1935	-1.0703	0.1519	0.1666	1.205	5.8764	6.2002	3.8683	5.1365	5.3853	3.7957	-2.1929	-0.3514	-0.2426	-0.8632	-0.7493	1.4241	0	10.566	4.2248	4.9596	9.2103	4.6446
S188WTS008	Codilean et al. 2022	3363.05		5.4902	9.6318	0.27161	0.5671	0.7411	4.6059	5.5925	5.8772	72.5694	125.547	195.712	5.4401	5.9546	6.4877	0.1933	0.3823	0.5493	5.502	4.077	3.5242	-0.7638	0.138	1.4985	0.3414	-1.356	0.1707	0.2345	1.3329	6.4303	6.3348	4.5366	5.6525	5.6768	4.063	-1.4172	0.2181	0.2545	-0.3557	-0.3122	1.5312	64.7559	5.304	3.3286	4.7768	9.2103	4.9244
S038WTS024	Codilean et al. 2022	89255.2		2.2116	9.5434	0.0781	0.1684	0.2989	3.1368	4.7992	4.8818	14.8499	23.9776	36.4542	3.0882	3.4149	3.7454	0.0365	0.0659	0.1144	6.0614	4.2036	3.6738	-1.4943	0.162	4.1947	0.3833	-1.9058	0.2432	0.1628	1.1338	6.0139	6.1056	1.9523	3.1519	4.7518	2.661	-1.9816	-1.7661	-1.7082	-2.0818	-2.0534	0.2705	95.5644	3.608	1.693	2.3026	9.2103	4.6052
S143WTS027	Codilean et al. 2022	4694.94		5.1566	8.9896	0.20305	0.4431	0.647	3.4801	4.9623	5.202	37.6305	73.9669	112.134	4.142	4.7519	5.2339	0.1228	0.2587	0.4309	7.7143	4.7439	4.011	-0.1667	37.482	47.0701	1.0283	-2.3238	0.4912	0.2675	1.3879	6.8238	6.8543	5.1329	5.4724	6.6317	4.4542	0.319	-0.8948	-0.7489	-1.3883	-1.274	0.7438	18.3885	10.032	4.3144	5.4698	9.2103	4.8908
S218WTS001	Codilean et al. 2022	178315		1.5195	9.536	0.0233	0.0355	0.1011	2.7882	4.7062	4.7765	8.6167	13.8336	23.1403	2.7118	2.9336	3.1018	0.0144	0.019	0.0517	6.0993	4.2996	3.7571	-1.3515	3.303	5.2116	0.4854	-2.0834	0.287	0.156	1.07	6.1931	6.2524	0.2374	1.7364	4.6332	2.4027	-1.6327	-1.8202	-1.6939	-2.0948	-2.0287	0.2705	53.0546	6.536	3.8701	2.3026	9.2103	4.6052
S136WTS010	Codilean et al. 2022	33576.4		3.1892	8.372	0.17882	0.4104	0.5422	3.2363	4.8551	4.9238	29.28	53.6977	70.0319	3.787	4.1806	4.4543	0.0996	0.2191	0.3047	6.5157	4.3147	3.5195	-0.2706	35.309	31.0624	0.7575	-2.3248	0.4667	0.244	1.241	6.7702	6.9395	4.0937	4.7847	6.2684	4.3833	0.249	-1.5669	-1.5146	-1.9754	-1.9421	0.4426	0.0376	8.634	3.369	5.3298	9.2103	4.7444
S108WTS020	Codilean et al. 2022	1434.33		6.3424	8.747	0.50195	0.7367	0.9088	4.8195	5.5725	5.7938	103.763	144.239	201.414	5.7963	6.0897	6.653	0.3329	0.5081	0.618	5.867	4.5597	3.953	-0.4617	53.343	55.3039	1.065	-2.7473	0.3833	0.2727	1.4163	6.6135	6.8467	4.2961	5.3067	6.1364	4.5194	-0.1937	-0.4681	-0.4086	-0.9816	-0.9408	1.155	85.9924	2.972	1.7869	4.8975	11.9025	5.5599
S094WTS012	Codilean et al. 2022	13280.6		4.1168	8.663	0.35982	0.5802	0.6871	4.5086	5.4051	5.5834	71.212	106.133	145.162	4.9437	5.397	5.7506	0.2479	0.4025	0.5063	7.6017	4.4768	3.6611	-1.3565	0.011	0.9294	0.3371	-1.5119	0.1849	0.191	1.213	5.7852	5.8011	3.2972	4.2442	5.501	3.7061	-2.2897	0.3216	0.3317	-0.2869	-0.2715	1.5988	70.8354	5.339	2.5748	6.1603	9.2103	5.3642
S023WTS016	Codilean et al. 2022	7517.53		4.6858	8.5642	0.09797	0.1327	0.2513	3.2302	4.8353	4.9627	16.2441	28.0083	44.7468	3.1362	3.5548	3.7218	0.0445	0.0756	0.1506	5.8228	3.9424	3.3545	-1.2816	9.784	8.6182	0.4858	-2.3096	0.1879	0.1664	1.1008	6.0112	5.9251	1.0699	2.3314	4.7636	2.7074	-2.1184	-1.521	-1.3448	-1.9533	-1.8452	0.5194	10.6094	5.694	1.3704	3.5598	9.2103	5.261
S127WTS015	Codilean et al. 2022	7054.8		4.7494	8.8834	0.22937	0.4457	0.5714	3.9649	5.1513	5.3036	46.5581	74.6406	101.114	4.6842	5.0947	5.6372	0.1452	0.2606	0.3354	6.316	4.3557	3.835	-0.6313	2.721	0.5294	0.3705	-1.9995	0.2558	0.2391	1.3138	6.699	6.6391	3.8126	4.9691	5.6881	4.1111	-0.8334	-1.0325	-0.9713	-1.4537	-1.4049	1.1763	0.108	7.402	0.0838	2.3026	9.2103	4.6052
S105WTS007	Codilean et al. 2022	2266.7		5.8847	8.477	0.2423	0.4954	0.6368	3.8271	5.061	5.1963	43.1851	69.8022	91.783	4.0465	4.4405	4.805	0.1523	0.2867	0.3785	5.6392	3.9391	3.2616	-0.7222	1.57	5.6183	0.4217	-1.9092	0.2128	0.2177	1.2892	6.1751	6.2141	2.6372	4.1485	5.2463	3.7722	-1.3793	-0.6387	-0.2071	-1.1047	-0.8536	1.105	45.2063	7.149	3.4404	4.9317	9.6338	5.9949
S143WTS013	Codilean et al. 2022	1145.02		6.5676	8.2317	0.43658	0.751	0.941	4.6274	5.4952	5.621	93.6853	138.578	182.116	5.6376	6.1325	6.4081	0.3391	0.5491	0.669	6.6773	4.6168	3.6958	0.3354	23.76	44.9758	0.7857	-1.9449	0.3077	0.2683	1.3827	7.1122	6.9917	4.7121	5.7259	6.9178	5.3755	0.3412	-1.0076	-0.9744	-1.4961	-1.4723	0.7408	78.5574	4.949	2.8544	6.341	11.2427	5.7819
S156WTS009	Codilean et al. 2022	93666.7		2.1633	8.583	0.03984	0.071	0.0948	2.6152	4.6568	4.6823	4.4328	5.8093	7.9171	3.1212	3.3497	3.7568	0.0162	0.0242	0.0307	7.5059	4.9117	4.2983	-0.0466	88.586	79.7018	1.1825	-3.4609	0.5777	0.2608	1.4367	7.2234	7.2204	4.2697	5.0889	6.2436	4.4692	0.95	-1.7481	-1.6322	-2.0265	-1.959	0.3345	99.5463	2	0	2.3026	9.2103	4.6052
S071WTS030	Codilean et al. 2022	21941.3		3.6147	8.6491	0.30822	0.5349	0.6476	3.7901	5.0451	5.1401	46.5311	70.7689	90.0489	4.3037	4.7505	4.9582	0.18	0.2911	0.3706	5.3705	4.0922	3.4089	-0.3022	4.829	4.1644	0.3225	-1.7802	0.2061	0.2789	1.4697	6.5586	6.5122	3.9716	4.9246	5.9621	4.269	-0.8209	-0.8723	-0.3016	-1.2994	-0.9932	0.9083	18.8349	7.77	3.3797	4.4563	9.2275	5.8571
S076WTS001	Codilean et al. 2022	513.902		7.3688	8.6925	0.50463	0.7318	0.9144	4.754	5.6024	5.8267	100.856	150.161	204.135	6.1086	6.5987	7.1439	0.3294	0.5389	0.6731	6.2392	4.9672	4.2095	-0.2534	21.176	34.105	0.7662	-2.0542	0.2899	0.2609	1.4147	6.8611	7.4776	5.5152	6.7523	7.24	5.9303	0.2627	-0.2365	-0.2027	-0.8194	-0.7794	1.6017	62.4222	4.827	2.3283	5.8786	11.332	5.652
S008WTS003	Codilean et al. 2022	115917		1.9502	8.7725	0.13264	0.2774	0.4239	3.3201	4.8547	4.9301	20.3117	34.1088	48.552	3.0875	3.3551	3.492	0.0613	0.1164	0.1855	5.8615	4.1279	3.5722	-1.6416	0.009	0.611	0.3055	-1.8464	0.1892	0.1401	1.1423	5.7902	5.9056	0.6627	1.9881	4.694	2.556	-2.4062	-1.785	-1.7673	-2.0851	-2.0778	0.2705	82.8908	4.829	2.8627	2.3026	9.2103	4.6052
S082WTS015	Codilean et al. 2022	15734.7		3.9472	8.699	0.18969	0.4109	0.5547	4.0251	5.2254	5.3882	45.233	78.4129	112.273	4.6473	5.2505	5.7475	0.1247	0.2523	0.3445	6.5333	4.2133	3.6012	-1.6483	0.029	0.7829	0.2281	-1.3398	0.1412	0.2102	1.1996	5.6509	6.3335	3.2918	4.196	5.477	3.6438	-2.1695	-0.3099	-0.2769	-0.8763	-0.8233	1.0204	54.6763	6.456	3.663	3.2646	9.2103	4.8276
S220WTS003	Codilean et al. 2022	1792.49		6.1195	9.1246	0.26354	0.3953	0.4846	3.7821	5.0807	5.1893	43.811	64.2721	83.9869	4.7229	5.218	5.4977	0.1632	0.2513	0.2989	7.979	4.954	3.9399	0.139	96.578	79.9639	1.3783	-3.6458	0.6501	0.1855	1.2719	7.3593	7.377	5.7393	6.6791	7.0538	5.4479	1.4146	-0.1254	-0.0679	-0.7311	-0.6714	1.8327	16.7701	6.344	1.2461	5.6311	9.2103	4.6668
S082WTS014	Codilean et al. 2022	9819.26		4.4187	9.4431	0.25064	0.4806	0.606	4.1513	5.2346	5.3903	51.4946	84.1966	113.667	4.9159	5.4171	5.7469	0.1689	0.311	0.4061	6.5276	4.2228	3.6932	-1.7189	0.085	0.6713	0.1919	-1.4855	0.1418	0.2312	1.2497	5.5314	6.2057	4.2059	5.354	5.5849	3.9718	-2.3313	-0.4994	-0.4829	-1.0328	-1.0038	1.0249	61.2738	5.859	3.1204	3.2379	9.2103	4.9129
S256WTS009	Codilean et al. 2022	6567.54		4.8209	9.5622	0.25529	0.4895	0.6864	4.4218	5.4498	5.7186	61.6615	104.553	163.169	5.3162	5.6883	6.2385	0.1704	0.3176	0.4799	5.7508	4.0242	3.4522	-0.767	0.25	1.7652	0.3163	-1.5712	0.1874	0.2485	1.3665	6.4165	6.3625	4.5708	5.7203	5.746	4.1777	-1.3524	0.1809	0.1687	-0.3562	-0.3494	1.3513	69.1421	4.866	2.8189	4.2393	9.2103	4.7991
S076WTS004	Codilean et al. 2022	454.001		7.4927	9.3782	0.53454	0.7454	0.9284	4.7727	5.6133	5.8386	105.3	152.798	210.793	6.235	6.7284	7.2712	0.3416	0.5513	0.6841	6.2523	4.9881	4.2375	-0.2185	21.672	36.5924	0.7969	-2.1542	0.3062	0.2622	1.4172	6.9109	7.5074	6.3295	7.5263	7.3676	6.0243	0.3573	-0.2047	-0.1846	-0.7961	-0.7651	1.5983	67.294	5.054	2.2553	6.103	11.6874	5.6369
S070WTS013	Codilean et al. 2022	2601.1		5.7471	9.1404	0.3058	0.5857	0.7204	3.9905	5.1669	5.3115	52.9408	83.9226	115.313	4.2328	4.6777	5.0647	0.1865	0.3358	0.4438	5.745	3.9625	3.2675	-0.6857	3.682	7.1688	0.4316	-1.9372	0.2341	0.2128	1.2662	6.2218	6.2523	3.0348	4.4751	5.1334	3.5306	-1.2631	-0.6582	-0.2715	-1.1239	-0.9039	1.1463	45.2184	6.982	3.0945	4.6885	9.5493	5.9413
S123WTS001	Codilean et al. 2022	2976.91		5.6122	9.5391	0.28302	0.558	0.7373	4.5778	5.5923	5.8794	71.2096	123.975	194.277	5.4618	5.9659	6.5756	0.1901	0.3768	0.5445	5.6147	4.1006	3.5545	-0.6824	0.15	1.6522	0.3523	-1.4952	0.1839	0.2382	1.3367	6.5179	6.4025	4.5366	5.6332	5.7384	4.1237	-1.2627	0.2027	0.2396	-0.3661	-0.3209	1.4995	67.2864	5.101	3.336	4.7621	9.2103	4.949
S076WTS003	Codilean et al. 2022	254.012		8.0734	9.354	0.53561	0.746	0.9305	4.7838	5.6169	5.8447	105.822	153.65	211.631	6.2462	6.7317	7.2797	0.3427	0.5539	0.6862	6.2196	4.9651	4.2197	-0.2371	21.657	35.9793	0.7651	-2.1542	0.2992	0.2618	1.4168	6.8831	7.501	6.2917	7.4952	7.3547	6.0174	0.3194	-0.2158	-0.1923	-0.8063	-0.7724	1.597	67.6828	5.046	2.2769	6.103	11.7095	5.6522
S026WTS007	Codilean et al. 2022	42754.5		2.9476	9.0579	0.13611	0.2525	0.375	2.9752	4.7735	4.8275	19.8366	34.2194	45.3145	3.683	4.1153	4.3833	0.0803	0.1583	0.2258	7.123	4.5836	4.0108	-0.0155	81.726	71.161	1.1856	-3.4143	0.5627	0.287	1.4784	7.0042	7.0455	4.8018	6.0207	6.2956	4.8897	0.7846	-1.9562	-1.9512	-2.1611	-2.1594	0.2137	6.4039	6.359	2.8555	4.5951	9.2103	5.3301
S133WTS014	Codilean et al. 2022	44627.6		2.9047	9.3672	0.17892	0.3281	0.4567	3.3702	4.8842	4.9633	27.7231	44.1199	59.324	3.9571	4.3676	4.8119	0.0962	0.166	0.2236	7.7719	4.909	4.2888	0.436	81.36	70.8355	1.5556	-2.6465	0.6825	0.3228	1.5941	7.4394	7.4334	5.7881	5.97	6.8804	4.5644	1.7738	-2.2182	-2.2173	-2.3026	-2.3026	0.0365	14.8034	6.476	1.729	2.3026	9.2103	4.6052
S188WTS007	Codilean et al. 2022	24045.4		3.5231	9.5068	0.14643	0.3182	0.477	3.991	5.1505	5.447	41.0593	63.5155	106.687	4.4969	4.9389	5.8757	0.0984	0.1857	0.2755	5.8789	3.8557	3.2996	-1.3012	0.002	0.7517	0.1733	-1.1102	0.1253	0.202	1.2215	5.8729	5.7309	3.1831	4.3109	5.0508	3.1884	-2.4631	0.2999	0.2947	-0.2483	-0.2278	1.4313	44.6585	7.3	3.8746	5.1913	9.2103	4.653
S120WTS008	Codilean et al. 2022	241810		1.2149	9.5691	0.05091	0.0964	0.1254	2.4943	4.6439	4.6708	4.0377	5.3065	11.6062	3.0287	3.2491	3.7918	0.0155	0.024	0.0334	8.2256	4.9329	4.5477	0.285	75.772	95.8798	1.4766	-2.6536	0.6125	0.2769	1.1555	7.4288	7.3527	5.2668	6.2904	6.2619	4.6727	1.407	-2.1153	-2.0503	-2.2109	-2.1777	0.4125	100	2	0	2.3026	9.2103	4.6052
S016WTS003	Codilean et al. 2022	321.277		7.8385	9.2573	0.56703	0.7445	0.9227	4.8086	5.5636	5.7603	105.207	147.516	197.893	6.2964	6.6371	7.0135	0.3508	0.5321	0.6592	6.9808	4.9368	4.1786	0.2193	29.218	35.8646	1.0153	-2.398	0.3111	0.2501	1.3951	7.286	7.4646	5.7471	6.9502	6.9415	5.582	0.6672	-0.1549	-0.1764	-0.7653	-0.7731	1.6681	73.8916	3.876	2.2557	6.5483	11.9491	5.6441
S102WTS007	Codilean et al. 2022	10349.3		4.3662	9.1417	0.14488	0.2947	0.4954	3.442	4.9043	5.0433	25.3247	41.204	66.6735	3.2413	3.5347	3.8544	0.0897	0.1634	0.27	5.4031	3.747	3.2074	-1.0123	0	0.717	0.191	-0.9498	0.1173	0.2185	1.2648	5.8921	5.8558	1.2961	2.3362	4.7202	2.5524	-2.1566	-0.6591	-0.0839	-1.1606	-0.7945	0.8445	1.0962	9.68	3.4642	4.0457	9.2103	5.9227
S136WTS007	Codilean et al. 2022	16347		3.909	8.8341	0.12864	0.2491	0.3665	3.4444	4.9101	4.9919	23.669	37.3401	55.567	4.0633	4.4579	4.698	0.076	0.1302	0.1873	6.5028	4.3981	3.6862	-0.091	28.218	42.2895	1.1516	-2.3403	0.5868	0.2742	1.3394	6.8098	6.8926	4.1689	4.6462	5.9735	3.8872	0.6588	-1.1451	-1.1255	-1.6756	-1.6571	0.5125	76.3269	3.889	2.0926	4.685	9.2103	4.8149
S230WTS020	Codilean et al. 2022	828.656		6.891	9.0123	0.30438	0.6479	0.7969	4.0826	5.2376	5.3608	62.3266	103.637	137.754	5.015	5.553	5.8419	0.2128	0.4167	0.5401	5.0481	3.8092	3.1172	-0.486	0.147	2.6478	0.2723	-1.0573	0.1162	0.1962	1.2181	6.3514	6.1555	4.6475	5.8163	6.2075	4.7432	-1.5013	0.1107	0.1836	-0.3899	-0.3373	2.1944	7.3581	8.089	3.0313	5.9294	11.7234	5.9899
S220WTS002	Codilean et al. 2022	1868.52		6.0779	8.9942	0.26548	0.3976	0.4859	3.7916	5.0888	5.1927	44.0774	64.6851	84.6485	4.7133	5.2145	5.4981	0.1639	0.2533	0.3011	7.9457	4.9519	3.9404	0.1218	96.58	80.0381	1.3733	-3.6613	0.6463	0.1843	1.2733	7.3517	7.363	5.6003	6.5494	7.0445	5.4471	1.3795	-0.1359	-0.0776	-0.7365	-0.6779	1.8452	18.822	6.218	1.047	5.6341	9.2103	4.674
S188WTS005	Codilean et al. 2022	9073.6		4.4977	9.4394	0.23802	0.4717	0.6582	4.3596	5.4221	5.6466	57.891	97.0706	154.92	4.7765	5.2884	5.8283	0.1606	0.2893	0.4409	5.9727	3.9163	3.357	-1.0698	0.458	0.131	0.2205	-1.0567	0.1258	0.2214	1.2866	6.1281	5.9533	3.2574	4.6443	5.1039	3.4426	-2.0947	0.1548	0.1606	-0.3886	-0.3735	1.3207	40.7249	6.869	2.8029	3.1976	9.2103	4.6968
S009WTS059	Codilean et al. 2022	17945.4		3.8157	8.7857	0.11573	0.222	0.3176	3.3682	4.8779	4.962	21.6653	33.2163	47.6002	3.8958	4.3214	4.5742	0.0684	0.119	0.1631	6.6432	4.4185	3.7228	-0.0616	28.343	38.5369	1.1495	-2.3602	0.6096	0.279	1.339	6.8655	6.8902	4.1059	4.5048	5.962	3.8134	0.7386	-1.2413	-1.2303	-1.7487	-1.739	0.4969	78.9563	3.532	1.6704	4.5697	9.2103	4.7329
S045WTS005	Codilean et al. 2022	474.632		7.4483	9.1982	0.5532	0.8077	0.979	4.6672	5.4971	5.6151	108.493	154.259	194.983	5.8792	6.2654	6.4859	0.3834	0.6102	0.7191	6.2833	4.3496	3.5442	-0.123	15.673	29.3278	0.715	-2.0948	0.1818	0.2756	1.449	6.6648	6.7814	6.6419	7.6497	7.8336	6.3198	-0.5168	-0.8133	-0.1344	-1.2293	-0.8276	1.1515	57.3616	4.698	1.5235	5.9341	12.8213	5.9598
S008WTS006	Codilean et al. 2022	617348		0.2776	9.3398	0.04423	0.0594	0.1969	3.0453	4.7657	4.8686	13.3795	22.2577	42.3318	3.2535	3.543	4.2164	0.0263	0.0334	0.105	5.6549	4.1333	3.5859	-1.6334	0.331	2.4084	0.3673	-1.3634	0.1786	0.1365	1.093	5.8093	5.8673	2.2689	3.454	4.8406	2.8412	-2.4604	-1.8502	-1.772	-2.1029	-2.0628	0.2705	75.4079	4.898	3.0875	2.3026	9.2103	4.6052
S038WTS025	Codilean et al. 2022	75453.7		2.3795	9.3275	0.0803	0.1731	0.2998	3.1291	4.7981	4.8761	15.0643	24.2831	36.3244	3.073	3.4105	3.6599	0.0361	0.066	0.1129	6.0646	4.2134	3.6938	-1.4574	0.179	4.718	0.3908	-1.9697	0.2548	0.168	1.1357	6.0633	6.1474	1.807	3.0302	4.7615	2.6898	-1.8874	-1.7632	-1.6999	-2.081	-2.0503	0.2705	96.6226	3.7	1.4765	2.3026	9.2103	4.6052
S023WTS008	Codilean et al. 2022	16047.7		3.9275	8.5186	0.06618	0.1671	0.2983	3.3228	4.868	4.9886	18.7884	30.5209	45.8894	3.1352	3.5129	3.8811	0.0549	0.1035	0.1643	5.5718	4.0058	3.4687	-1.2575	22.079	20.9897	0.3553	-2.4158	0.2375	0.1585	1.1059	6.0551	5.8954	0.4916	1.8518	4.7009	2.5824	-1.9962	-1.5182	-1.3529	-1.9661	-1.8669	0.5475	21.5276	6.948	3.2281	3.5071	9.2103	5.2169
S108WTS045	Codilean et al. 2022	995.431		6.7076	8.6776	0.50428	0.74	0.9152	4.8106	5.5655	5.7837	103.291	144.062	200.603	5.755	6.0844	6.5917	0.3334	0.509	0.6199	5.8064	4.5297	3.9262	-0.5192	50.774	52.9308	1.065	-2.7211	0.3639	0.2718	1.4217	6.5403	6.8135	4.2159	5.2041	6.1271	4.4889	-0.3165	-0.4818	-0.4192	-0.9937	-0.9511	1.1495	85.1309	3.03	1.8235	4.9021	11.9663	5.5994
S059WTS014	Codilean et al. 2022	44505.7		2.9074	8.9082	0.02525	0.4494	0.613	3.7345	5.2138	5.3772	50.5579	90.7773	121.188	4.3578	5.1673	5.6873	0.1247	0.2973	0.4	6.6517	4.4725	4.3075	-1.1806	6.373	29.7694	0.977	-2.0964	0.4065	0.1987	1.3736	6.0253	6.1532	3.4827	4.8674	5.4683	4.0067	-1.276	0.0569	0.1428	-0.5256	-0.4266	1.5581	32.629	8.08	3.9819	2.3026	9.2103	4.6052
S038WTS017	Codilean et al. 2022	97243.4		2.1258	8.7745	0.0529	0.0736	0.2792	2.9431	4.7424	4.8154	13.5998	24.2016	41.9533	2.9764	3.2284	3.584	0.0314	0.0476	0.152	5.867	4.1885	3.7006	-1.5042	0.571	4.1438	0.3792	-1.9718	0.2257	0.142	1.112	5.9886	6.0511	1.3566	2.5577	4.7758	2.714	-2.0815	-1.8332	-1.7453	-2.0948	-2.0487	0.2705	81.0043	4.15	2.6105	2.3026	9.2103	4.6052
S111WTS008	Codilean et al. 2022	477.519		7.4422	8.6743	0.50659	0.7224	0.8878	4.8201	5.5669	5.7812	103.415	140.819	183.987	6.1162	6.5441	7.0462	0.3458	0.5016	0.6141	6.1561	5.2058	4.417	0.1228	37.543	54.0536	0.9314	-2.4663	0.4475	0.2713	1.4507	7.3006	7.7925	5.6684	6.6962	7.3998	5.8931	1.2304	-0.144	-0.0996	-0.669	-0.6296	1.4381	80.6062	4.288	2.2598	6.5198	11.5094	5.3021
S009WTS017	Codilean et al. 2022	9548.86		4.4466	8.077	0.09787	0.1945	0.3327	3.0737	4.777	4.8365	17.4108	28.3995	41.9362	3.6123	3.961	4.1468	0.0555	0.0978	0.1658	6.9005	4.3136	3.5221	0.1646	40.094	46.9297	1.1518	-2.4259	0.5684	0.2904	1.4405	6.8984	6.8714	3.7487	4.3982	6.2218	4.297	0.7875	-0.777	-0.7497	-1.2965	-1.274	0.7518	0.6693	8.997	3.6725	4.3954	9.2103	5.1266
S009WTS018	Codilean et al. 2022	10625.9		4.3398	8.077	0.09787	0.1945	0.3327	3.0737	4.777	4.8365	17.4108	28.3995	41.9362	3.6123	3.961	4.1468	0.0555	0.0978	0.1658	6.9005	4.3136	3.5221	0.1646	40.094	46.9297	1.1518	-2.4259	0.5684	0.2904	1.4405	6.8984	6.8714	3.7487	4.3982	6.2218	4.297	0.7875	-0.777	-0.7497	-1.2965	-1.274	0.7518	0.6693	8.997	3.6725	4.3954	9.2103	5.1266
S235WTS006	Codilean et al. 2022	21876.5		3.6177	8.6182	0.13145	0.313	0.5065	3.5055	4.949	5.1208	29.063	52.5866	79.8411	3.5119	3.9881	4.2567	0.0907	0.1877	0.3013	5.9189	4.2909	3.5344	-1.5534	0	1.1138	0.1727	-0.9726	0.1484	0.1647	1.1835	5.9002	6.0933	2.8113	4.1029	5.2634	3.6336	-2.2844	-0.2925	-0.1754	-0.8113	-0.686	1.4049	0	10.917	4.3276	4.4726	9.2103	4.6168
S235WTS015	Codilean et al. 2022	145000		1.7263	8.6182	0.13145	0.313	0.5065	3.5055	4.949	5.1208	29.063	52.5866	79.8411	3.5119	3.9881	4.2567	0.0907	0.1877	0.3013	5.9189	4.2909	3.5344	-1.5534	0	1.1138	0.1727	-0.9726	0.1484	0.1647	1.1835	5.9002	6.0933	2.8113	4.1029	5.2634	3.6336	-2.2844	-0.2925	-0.1754	-0.8113	-0.686	1.4049	0	10.917	4.3276	4.4726	9.2103	4.6168
S108WTS025	Codilean et al. 2022	1293.88		6.4454	8.6354	0.50573	0.7428	0.9195	4.8085	5.5663	5.7742	103.296	145.091	201.823	5.7294	6.0844	6.5302	0.3332	0.5101	0.6218	5.7822	4.5067	3.9059	-0.5492	49.388	51.585	1.0234	-2.7046	0.3531	0.2719	1.4217	6.504	6.8002	4.1827	5.1684	6.1336	4.494	-0.379	-0.4852	-0.4211	-0.9967	-0.9532	1.1441	84.5002	3.073	1.8585	4.9093	12.0053	5.6197
S133WTS008	Codilean et al. 2022	68709.9		2.4732	8.7354	0.22165	0.3743	0.4881	3.2471	4.8652	4.9604	25.0075	43.614	59.3834	3.9389	4.4953	4.9653	0.0883	0.159	0.2285	7.7727	4.8914	4.4051	0.0744	34.711	10.654	1.1086	-2.1312	0.5968	0.3028	1.4921	7.2303	7.2228	4.3963	5.3499	6.2249	4.5683	1.0941	-2.1413	-2.1388	-2.2387	-2.2377	0.0162	99.2695	2.059	0	2.3026	9.2103	4.6052
S156WTS011	Codilean et al. 2022	156712		1.6487	8.4146	0.10915	0.2169	0.3476	2.9219	4.7532	4.8278	16.6696	31.5338	44.9404	3.4397	3.7457	4.1591	0.0533	0.105	0.1882	7.3537	4.815	4.1892	-0.0629	90.925	70.2409	1.1276	-3.6382	0.5955	0.2706	1.4658	7.0814	7.105	4.1011	5.015	6.2406	4.5502	0.8851	-1.6745	-1.6296	-2.0604	-2.0371	0.3585	61.341	3.501	2.1493	4.0378	9.2103	4.6088
S023WTS017	Codilean et al. 2022	7650.21		4.6683	8.442	0.10711	0.1239	0.2418	3.1939	4.8122	4.9543	15.2914	25.8361	43.41	3.0877	3.4187	3.6925	0.042	0.0672	0.1436	5.8286	3.9278	3.3339	-1.2785	9.686	8.3662	0.5188	-2.3076	0.1868	0.167	1.1002	6.0091	5.9341	0.9984	2.2838	4.7708	2.732	-2.1112	-1.5302	-1.3513	-1.959	-1.849	0.5102	9.1512	5.72	1.2556	3.5824	9.2103	5.2703
S207WTS032	Codilean et al. 2022	4572.95		5.1829	8.1092	0.46519	0.7547	0.9565	4.7837	5.5682	5.7183	99.9079	143.295	190.316	5.8256	6.3007	6.5576	0.373	0.5605	0.6758	6.2568	4.5422	3.6183	0.2609	19.915	34.8091	0.7317	-1.8702	0.2187	0.259	1.3622	6.9398	6.9434	4.826	5.6878	7.1301	5.453	0.011	-0.764	-0.7255	-1.283	-1.2532	0.8948	44.8299	6.258	3.4605	6.6689	12.6525	5.957
S094WTS015	Codilean et al. 2022	3168.11		5.5499	8.4839	0.50236	0.7427	0.901	4.7765	5.5227	5.6582	101.463	141.079	181.778	5.4134	5.8046	6.0523	0.3648	0.5619	0.6649	7.1794	4.6808	3.831	-0.7287	0.087	4.1164	0.4411	-1.4143	0.0966	0.1987	1.25	6.358	6.47	4.4097	4.9761	6.4389	4.4553	-1.4677	-0.0572	-0.1008	-0.6489	-0.6856	1.5168	37.8668	8.032	3.7896	7.332	11.907	6.0152
S023WTS010	Codilean et al. 2022	18990.9		3.7591	8.4439	0.08598	0.1664	0.2972	3.2931	4.8591	4.9725	18.4353	30.1642	45.0442	3.0728	3.4176	3.7096	0.0545	0.1031	0.1632	5.5292	4.0016	3.4651	-1.2651	21.676	20.2754	0.3691	-2.4091	0.2358	0.1588	1.105	6.0486	5.8999	0.1856	1.5663	4.6816	2.5345	-2.0026	-1.5219	-1.3563	-1.969	-1.8695	0.5434	19.211	7.071	3.2451	3.5096	9.2103	5.218
S038WTS036	Codilean et al. 2022	156111		1.6525	8.6969	0.045	0.0557	0.2382	2.9236	4.7417	4.8197	13.6939	22.7351	45.5579	2.9768	3.3095	3.568	0.0272	0.0339	0.125	5.9923	4.1755	3.654	-1.5805	0.279	1.8742	0.3268	-1.9153	0.211	0.143	1.0996	5.8951	5.9697	1.1308	2.3376	4.7537	2.6678	-2.2478	-1.8122	-1.7131	-2.0923	-2.0418	0.2705	82.9372	3.693	2.852	2.3026	9.2103	4.6052
S076WTS013	Codilean et al. 2022	474.748		7.448	8.583	0.51769	0.7458	0.9295	4.8045	5.623	5.8488	104.538	154.299	209.344	6.1784	6.6404	7.2044	0.3392	0.553	0.6835	6.0618	4.8906	4.1497	-0.3386	21.133	31.3912	0.7662	-2.0456	0.2601	0.2616	1.4155	6.7338	7.4426	5.4118	6.6448	7.2438	5.9304	0.09	-0.2842	-0.2431	-0.8623	-0.8171	1.5798	59.7447	4.943	2.426	5.8786	11.4273	5.7229
S082WTS028	Codilean et al. 2022	29312.9		3.325	8.6672	0.28369	0.5134	0.6443	4.2535	5.285	5.4249	57.2972	91.7357	123.671	4.6817	5.1723	5.6624	0.189	0.3359	0.4454	6.4171	4.1697	3.6714	-1.4811	0.568	0.8549	0.1832	-1.5654	0.1532	0.2373	1.2866	5.8081	6.7876	2.9742	4.0577	5.3204	3.5658	-1.6213	-0.8498	-0.8233	-1.3307	-1.302	1.0616	22.4912	6.672	3.3615	3.2176	9.2103	4.6678
S235WTS010	Codilean et al. 2022	12734.8		4.1587	8.5598	0.16364	0.3689	0.5304	3.7403	5.056	5.1632	37.3923	65.3451	95.3783	4.1133	4.5692	4.8383	0.1153	0.2395	0.3334	6.4034	4.3813	3.6672	-1.5827	0	1.5329	0.2138	-1.2358	0.1603	0.1699	1.2245	5.8334	6.3224	3.291	4.5259	5.5584	4.0077	-2.0792	-0.4047	-0.3065	-0.9061	-0.8072	1.4485	0	10.402	4.1749	5.0282	9.2103	4.6851
S235WTS014	Codilean et al. 2022	11152.3		4.2914	8.5598	0.16364	0.3689	0.5304	3.7403	5.056	5.1632	37.3923	65.3451	95.3783	4.1133	4.5692	4.8383	0.1153	0.2395	0.3334	6.4034	4.3813	3.6672	-1.5827	0	1.5329	0.2138	-1.2358	0.1603	0.1699	1.2245	5.8334	6.3224	3.291	4.5259	5.5584	4.0077	-2.0792	-0.4047	-0.3065	-0.9061	-0.8072	1.4485	0	10.402	4.1749	5.0282	9.2103	4.6851
S133WTS016	Codilean et al. 2022	47460.7		2.8432	8.5949	0.16652	0.3063	0.4444	3.3324	4.8757	4.9507	26.5343	42.9835	58.1315	3.8332	4.2428	4.5493	0.0909	0.1576	0.2116	7.7252	4.8992	4.2753	0.4467	75.439	60.3698	1.4784	-2.5823	0.6592	0.3238	1.577	7.4477	7.4308	4.9683	5.1281	6.829	4.4935	1.719	-2.2192	-2.2182	-2.3026	-2.3026	0.0372	2.2058	6.77	1.7744	2.3026	9.2103	4.6052
S186WTS007	Codilean et al. 2022	149523		1.6956	8.3266	0.11875	0.2869	0.4085	3.1176	4.8114	4.8585	21.5451	39.3707	51.0025	3.6283	4.0367	4.2542	0.0689	0.1537	0.2214	7.2856	4.7656	4.1568	-0.0716	77.093	55.3171	1.1866	-3.2015	0.5902	0.2806	1.4106	7.0271	7.0559	3.8631	4.8403	6.1201	4.4713	0.8225	-1.794	-1.7568	-2.0956	-2.0778	0.285	20.337	8.268	3.895	4.2895	9.2103	4.8393
S102WTS004	Codilean et al. 2022	29904.6		3.3051	8.3875	0.26617	0.5191	0.6371	3.8917	5.0721	5.1725	44.3895	70.5425	88.5723	3.4804	3.8209	4.0583	0.176	0.3166	0.3987	5.916	3.7723	3.2335	-1.1406	0	7.6862	0	-1.0021	0.0935	0.2103	1.2511	5.743	5.5842	-0.1427	0.8565	4.6636	2.4295	-2.5494	-0.6584	-0.2085	-1.21	-0.8829	0.5219	17.1714	7.599	3.2376	4.3628	9.2103	5.9524
S143WTS012	Codilean et al. 2022	1063.96		6.6411	8.077	0.47921	0.7738	0.9641	4.7473	5.5141	5.6399	100.495	142.469	188.58	5.7362	6.18	6.5117	0.3762	0.566	0.6811	6.3185	4.565	3.6233	0.3894	24.174	44.1035	0.7623	-1.9105	0.2795	0.266	1.3771	7.1489	7.0176	4.591	5.6505	6.9442	5.447	0.3311	-0.9774	-0.9587	-1.4684	-1.4541	0.7559	86.2122	4.317	2.2042	6.3672	11.3746	5.8691
S137WTS009	Codilean et al. 2022	9237.13		4.4798	8.099	0.20007	0.4066	0.5196	3.47	4.9377	5.0432	31.7325	55.7272	76.8286	4.1567	4.7181	4.7924	0.1136	0.2177	0.3069	7.3792	4.7033	3.9819	-0.1536	40.673	69.8415	1.1703	-2.356	0.5793	0.2722	1.3827	6.913	7.1477	3.6607	4.0956	6.1351	4.0238	0.8103	-1.2438	-1.2255	-1.7367	-1.7215	0.5453	44.4052	6.796	3.5785	5.1392	9.2103	4.6869
S059WTS013	Codilean et al. 2022	63416.3		2.5533	8.7468	0.09832	0.4753	0.6338	3.8575	5.2515	5.3961	54.2638	92.8394	122.867	4.4781	5.3211	5.7143	0.1436	0.3133	0.4141	6.6241	4.4617	4.3173	-1.1038	7.47	34.892	1.0632	-2.1777	0.4283	0.2019	1.3536	6.1098	6.2255	3.4391	4.8021	5.5366	4.084	-1.0986	0.0224	0.094	-0.5459	-0.466	1.5655	38.2529	7.449	3.8458	2.3026	9.2103	4.6052
S076WTS002	Codilean et al. 2022	271.766		8.0059	8.4994	0.59004	0.7767	0.9613	4.8624	5.6433	5.8829	115.689	161.95	228.665	6.4456	6.9435	7.3811	0.3717	0.5825	0.7157	5.9952	4.8852	4.1697	-0.3032	22.032	34.7207	0.695	-2.2877	0.2795	0.2636	1.4217	6.7789	7.4911	5.5623	6.7481	7.4615	6.1111	0.2092	-0.2152	-0.2008	-0.8137	-0.785	1.5756	72.528	5.394	2.3152	6.3032	12.1051	5.7239
S010WTS030	Codilean et al. 2022	7388.7		4.7031	7.9912	0.32506	0.5278	0.6358	4.0643	5.1941	5.2864	56.1818	83.3063	110.051	4.9144	5.3886	5.7121	0.2114	0.3317	0.4194	6.2737	4.1494	3.3209	-0.5481	87.101	89.2995	0.9679	-2.9188	0.4656	0.2036	1.2177	6.4334	6.8907	3.9456	4.9704	6.4521	4.8846	-0.0072	-1.5233	-1.5033	-1.9498	-1.9352	0.4907	99.8638	2.031	0.0687	5.9954	9.2103	5.7731
S104WTS025	Codilean et al. 2022	669.152		7.1048	8.4286	0.5232	0.7462	0.9022	4.6792	5.4524	5.5866	100.314	136.348	174.714	5.5821	5.901	6.2652	0.3487	0.5031	0.6089	7.0274	4.9025	4.2677	0.0456	40.424	46.9506	0.9661	-2.4569	0.4425	0.2179	1.3239	7.2203	7.2924	4.4191	5.4788	6.4926	4.9613	0.7296	-0.2044	-0.278	-0.831	-0.8788	1.6107	59.8513	4.797	2.3166	5.7649	10.7924	5.3565
S064WTS003	Codilean et al. 2022	1368.61		6.3893	8.4176	0.6082	0.8202	0.9636	4.7901	5.5469	5.6427	118.535	157.816	200.837	5.5239	5.9492	6.1447	0.4076	0.5877	0.6798	6.3906	4.2682	3.6354	0.1251	52.619	51.7631	0.8885	-2.4974	0.4012	0.2797	1.4188	6.7703	7.0067	4.4223	5.1434	6.5044	4.6632	0.4375	-0.7119	-0.2838	-1.1878	-1.0005	1.0329	19.7063	6.921	0.3903	4.4627	9.2103	5.6647
S188WTS017	Codilean et al. 2022	12293		4.194	8.6879	0.38441	0.6665	0.7928	4.767	5.6703	5.8781	90.2847	145.247	210.253	5.7512	6.4085	6.7897	0.266	0.468	0.6036	4.8025	4.0423	3.4863	-0.6187	2.501	1.0998	0.3816	-1.7755	0.2165	0.2481	1.361	6.4833	6.3517	4.3733	5.4405	6.244	4.6921	-1.1727	-0.0199	-0.002	-0.5845	-0.5644	1.6817	71.5756	4.815	2.879	4.9003	9.3916	4.6429
S193WTS032	Codilean et al. 2022	1126.02		6.5844	8.4142	0.61509	0.8202	0.9635	4.7899	5.547	5.6427	118.498	157.781	200.786	5.5241	5.9494	6.1449	0.4076	0.5877	0.6798	6.3906	4.2682	3.6354	0.126	52.635	51.7981	0.8885	-2.4962	0.4017	0.2797	1.4188	6.7704	7.0069	4.4223	5.1434	6.5073	4.6663	0.4397	-0.7119	-0.2838	-1.1878	-1.0005	1.034	19.7141	6.92	0.3905	4.4675	9.2103	5.6658
S193WTS033	Codilean et al. 2022	1237.57		6.4899	8.414	0.61506	0.8201	0.9634	4.7898	5.5471	5.6428	118.492	157.775	200.802	5.5241	5.9495	6.1449	0.4076	0.5877	0.6798	6.3906	4.2682	3.6354	0.126	52.636	51.8063	0.8885	-2.4962	0.4017	0.2797	1.4188	6.7704	7.0069	4.4223	5.1434	6.5075	4.6664	0.4397	-0.7119	-0.2838	-1.1878	-1.0005	1.034	19.7181	6.92	0.3906	4.4675	9.2103	5.6659
S123WTS012	Codilean et al. 2022	14194.4		4.0502	8.6857	0.41653	0.6667	0.7929	4.7674	5.6708	5.8781	90.3195	145.286	210.425	5.7503	6.4093	6.7897	0.2661	0.468	0.6036	4.8025	4.0423	3.4863	-0.6172	2.502	1.1021	0.3985	-1.7755	0.2163	0.2481	1.361	6.4848	6.3563	4.3733	5.4405	6.2457	4.6941	-1.1681	-0.0289	-0.0136	-0.591	-0.5738	1.6817	71.788	4.798	2.87	4.8582	9.3949	4.6425
S009WTS001	Codilean et al. 2022	34765.4		3.1544	7.9005	0.07595	0.2269	0.2962	3.1218	4.8171	4.8869	20.6023	34.9044	45.886	3.5495	3.9333	4.2118	0.0819	0.148	0.2035	6.6086	4.3322	3.4968	0.2624	62.063	59.1816	1.2318	-2.7473	0.5859	0.2768	1.4118	6.9216	6.9115	3.4427	4.3597	6.1148	4.4122	0.9421	-1.8931	-1.8728	-2.1062	-2.098	0.3855	87.2809	3.104	2.3377	5.0081	9.2103	5.442
S025WTS013	Codilean et al. 2022	3956.4		5.3277	8.6641	0.4782	0.7124	0.8439	4.809	5.5559	5.6984	102.029	143.939	191.435	5.542	5.9655	6.2004	0.3158	0.4764	0.5629	7.1114	4.4678	3.9615	-0.1983	28.638	32.9708	0.9085	-2.2663	0.4313	0.2628	1.3783	7.0075	7.0947	3.9782	5.021	5.9561	4.3396	0.3449	-0.519	-0.528	-1.0098	-1.0098	1.2062	2.9416	6.927	2.3998	6.3404	9.8222	4.6294
S016WTS002	Codilean et al. 2022	206.216		8.2819	8.4204	0.58109	0.7434	0.943	4.8416	5.6202	5.85	105.728	150.707	204.873	6.4859	6.8155	7.4382	0.3518	0.5563	0.6894	5.7947	4.6551	3.8371	0.129	6.009	18.925	0.5375	-2.2164	0.1088	0.2651	1.4184	7.0337	7.3695	5.0637	6.2384	7.0699	5.6908	-0.0106	-0.2383	-0.2158	-0.8233	-0.8106	1.728	76.3828	3.368	1.5837	6.7729	12.5481	6.0248
S258WTS008	Codilean et al. 2022	3854.05		5.3539	8.7142	0.40558	0.6366	0.7694	4.5033	5.4103	5.5284	75.4848	111.273	154.794	5.4887	6.0157	6.3086	0.2365	0.3735	0.4634	7.2742	4.7925	4.2432	0.3925	53.927	74.0062	1.3329	-2.273	0.5241	0.2553	1.3505	7.4805	7.7605	5.534	5.9353	7.2377	5.1262	1.6082	-0.4299	-0.4332	-0.9442	-0.9421	1.2917	82.1722	3.037	1.7602	2.3026	9.2103	4.6052
S009WTS049	Codilean et al. 2022	22198.3		3.603	7.305	0.12746	0.2504	0.334	3.5007	4.9227	5.0218	24.9018	39.1623	54.47	3.9336	4.4985	4.5438	0.086	0.1484	0.2019	6.5073	4.3666	3.6772	-0.1275	53.574	63.0913	1.3474	-2.6722	0.6566	0.2766	1.3552	6.7618	6.9153	2.5935	3.0912	5.9017	3.8266	0.8324	-1.1838	-1.1786	-1.6799	-1.6804	0.5247	79.0931	3.345	1.8493	4.5505	9.2103	4.7
S086WTS009	Codilean et al. 2022	167.034		8.4926	7.7742	0.60038	0.7498	0.945	4.9342	5.6544	5.9238	116.615	163.287	231.494	6.6415	6.9761	7.8453	0.3632	0.5748	0.7216	5.1931	4.6806	3.946	-0.4502	12.515	16.082	0.4465	-2.1211	0.1369	0.2652	1.4102	6.4346	7.3381	4.5819	5.8255	7.2033	5.8981	-0.4058	-0.1635	-0.1895	-0.7759	-0.7781	1.527	99.5383	2.884	0.0884	6.504	12.8619	5.956
S136WTS006	Codilean et al. 2022	24339.9		3.5109	7.2922	0.13599	0.2509	0.3344	3.5011	4.923	5.0219	24.9426	39.2341	54.5008	3.9326	4.4985	4.5438	0.0864	0.1488	0.2022	6.5073	4.3644	3.6769	-0.1305	53.469	63.0816	1.3474	-2.6693	0.6571	0.2766	1.3552	6.7595	6.9136	2.5935	3.0912	5.9104	3.836	0.83	-1.1838	-1.1786	-1.6799	-1.6804	0.5247	78.9979	3.35	1.8463	4.5431	9.2103	4.6942
S120WTS007	Codilean et al. 2022	263722		1.1282	8.0331	0.05678	0.1091	0.1414	2.4475	4.6334	4.6474	3.3327	5.1965	10.7912	3.0319	3.2315	3.9875	0.0152	0.0239	0.0336	8.4143	4.8636	4.5676	0.4081	59.935	99.9812	1.414	-2.5383	0.5865	0.2709	1.2465	7.4816	7.3566	4.1451	5.1952	6.5877	5.0561	1.4364	-2.1354	-2.0691	-2.2109	-2.1733	0.4125	100	2	0	2.3026	9.2103	4.6052
S143WTS004	Codilean et al. 2022	952.03		6.7522	7.2599	0.52589	0.8388	1.0428	4.6759	5.5099	5.5919	106.919	149.162	193.165	5.7458	6.1898	6.3953	0.4138	0.6181	0.7413	7.1735	4.7919	3.8886	0.6298	41.211	46.6635	1.0992	-2.2557	0.365	0.2714	1.4143	7.3635	7.4052	4.1659	4.7777	7.2696	5.3581	1.0696	-1.2307	-1.2167	-1.674	-1.666	0.5847	71.3931	4.344	3.0897	6.0681	9.3254	5.7421
S021WTS018	Codilean et al. 2022	38953.2		3.0407	8.0163	0.29445	0.399	0.5366	3.8847	5.1265	5.251	44.0179	69.9649	94.422	4.9843	5.54	5.8821	0.1414	0.2449	0.3231	8.1397	5.1737	4.5667	0.432	81.589	46.1389	1.5763	-2.6986	0.6674	0.2874	1.3478	7.7831	7.6811	4.6077	5.3769	7.0126	5.2426	1.9438	-1.8414	-1.8566	-2.0818	-2.0875	0.0552	92.3918	2.314	0.8896	2.3026	9.2103	4.6052
S188WTS021	Codilean et al. 2022	8368.25		4.5786	7.9913	0.36837	0.6368	0.7483	4.7093	5.6103	5.7778	82.8138	128.968	182.473	5.6355	6.2337	6.5509	0.251	0.429	0.5379	4.6153	4.1472	3.4795	-0.6977	3.797	1.5284	0.5281	-1.8669	0.2151	0.227	1.2837	6.2513	6.1447	2.9954	4.3093	5.7249	4.2918	-1.4141	-0.07	-0.054	-0.6247	-0.6088	1.7558	64.7108	5.632	3.0467	3.8533	9.2103	4.6218
S094WTS016	Codilean et al. 2022	4197.49		5.2686	7.631	0.52216	0.7821	0.9614	4.7506	5.4965	5.5817	106.992	150.25	193.692	5.5006	5.9597	6.0891	0.3832	0.5997	0.6985	7.7985	4.7835	3.9121	-0.6201	0.382	6.6913	0.2173	-1.3273	0.1016	0.1987	1.2476	6.5328	6.754	3.785	4.4611	6.6106	4.7347	-1.1283	-0.0957	-0.1435	-0.7425	-0.7877	1.4504	39.0453	7.512	3.8766	7.5823	12.1947	5.966
S025WTS006	Codilean et al. 2022	4130.47		5.2847	7.9581	0.44652	0.6722	0.8029	4.8838	5.5663	5.6969	102.044	144.757	190.472	5.6566	6.0464	6.2032	0.3135	0.4713	0.5556	6.5772	4.3532	3.8011	-0.2904	15.143	8.0659	0.6752	-2.1813	0.3599	0.262	1.3688	6.9211	7.0508	3.2503	4.3863	5.9271	4.3867	0.0509	-0.5644	-0.5427	-1.0339	-1.0098	1.2327	0.3006	7.701	2.9255	6.919	9.881	4.6352
S025WTS046	Codilean et al. 2022	997.271		6.7058	7.2211	0.49531	0.7789	0.9411	4.8425	5.6367	5.7627	115.452	162.862	220.23	5.2347	5.7257	5.9211	0.3671	0.5392	0.6444	7.5071	4.5697	4.1004	-0.2717	53.69	44.4913	1.1054	-2.3709	0.4637	0.2705	1.411	6.9547	7.088	1.7483	2.9679	5.4084	3.7916	0.3677	-0.7099	-0.7302	-1.1734	-1.1868	1.209	9.3153	5.792	0	5.1358	9.9801	4.7443
S025WTS020	Codilean et al. 2022	2442.38		5.8101	7.2225	0.5501	0.7705	0.9164	4.7156	5.5697	5.8059	104.502	143.414	190.223	5.2142	5.4762	6.1456	0.3358	0.4986	0.5842	8.2128	4.7572	4.2812	-0.157	69.169	68.6533	1.2852	-2.5345	0.5267	0.2582	1.3544	7.0878	7.1463	1.8616	2.9953	5.4719	3.8119	0.6694	-0.6125	-0.664	-1.1147	-1.1501	1.2046	10.9345	5.577	0	5.1938	9.954	4.658
S143WTS025	Codilean et al. 2022	452.034		7.4971	6.4943	0.48898	0.8009	1.0277	4.9059	5.6449	5.7548	105.029	152.659	214.054	6.0142	6.4912	6.619	0.3943	0.606	0.7283	6.0566	4.6409	3.7244	-0.0066	12.03	30.0275	0.5787	-1.8257	0.1269	0.2414	1.3288	6.6479	6.7951	3.2756	3.9894	7.0869	5.2672	-0.5594	-0.8108	-0.7722	-1.3269	-1.2946	0.9047	56.0018	4.638	2.8659	6.8526	12.8269	6.0297
S188WTS041	Codilean et al. 2022	40502		3.0017	7.1896	0.24157	0.4769	0.6537	4.3777	5.3799	5.5971	63.4635	104.559	161.43	3.8498	4.2991	4.5675	0.1669	0.3019	0.4406	5.9397	3.8328	3.2296	-1.6554	0	0.4737	0.1296	-1.0467	0.1163	0.1815	1.1507	5.5121	5.3181	-1.6766	-0.5997	4.6436	2.3961	-3.1106	0.2004	0.2654	-0.3571	-0.2937	1.2638	61.4702	6.881	3.1589	2.7304	9.2103	4.6134
S188WTS030	Codilean et al. 2022	36057.5		3.1179	7.2838	0.26313	0.5184	0.6766	4.196	5.3791	5.5753	60.0725	100.934	137.752	5.0798	5.9456	6.2632	0.1905	0.3402	0.4538	5.409	4.5465	4.3191	-0.9074	7.475	30.5722	0.8744	-2.077	0.3721	0.2367	1.3246	6.254	6.0661	2.1236	3.463	5.5959	4.1452	-1.2321	-0.0731	-0.0508	-0.6665	-0.6392	1.6284	45.9103	6.951	3.3679	2.3026	9.2103	4.6052
S104WTS021	Codilean et al. 2022	2702.82		5.7088	6.9614	0.4991	0.7273	0.8866	4.5913	5.4225	5.5204	93.9566	129.654	166.634	5.5399	5.9449	6.2403	0.3295	0.4776	0.5813	7.4524	5.0041	4.3409	0.1933	50.103	61.4375	1.1264	-2.5666	0.4968	0.1959	1.319	7.3853	7.4235	3.1632	4.3489	6.6144	5.213	1.0962	-0.1761	-0.2426	-0.801	-0.8521	1.6127	36.9858	7.191	3.6116	5.3748	9.7271	5.1415
S057WTS011	Codilean et al. 2022	1553.61		6.2625	6.5381	0.42048	0.7811	0.9696	4.2294	5.2497	5.3656	87.1251	134.416	166.68	4.8132	5.1527	5.2059	0.3397	0.5799	0.6849	6.5143	4.4498	3.5603	0.3094	19	41.6579	0.9115	-1.94	0.3492	0.2613	1.3386	7.2084	7.0429	2.7113	3.5948	6.5511	4.862	0.4735	-1.025	-1.0038	-1.5233	-1.5037	0.6531	35.2469	6.416	3.4462	6.0442	9.4039	5.7844
S230WTS022	Codilean et al. 2022	437.699		7.5293	8.781	0.47996	0.8121	0.9862	4.685	5.5219	5.6844	99.8848	144.973	190.631	5.7915	6.3368	6.5405	0.3719	0.5964	0.7136	4.6291	4.0345	3.1788	0.1014	0.073	11.2985	0.1271	-1.3467	0.0104	0.2159	1.3992	6.738	6.4823	4.9646	6.2823	6.6643	5.3928	-1.0491	-0.1023	-0.1097	-0.6188	-0.6321	2.0944	60.7941	5.645	3.0645	7.0035	13.8149	6.1299
S156WTS008	Codilean et al. 2022	109530		2.0069	8.9174	0.0396	0.0707	0.0938	2.5999	4.6555	4.6737	4.2661	5.8165	7.7756	3.0425	3.3116	3.6044	0.0161	0.0243	0.0305	7.4737	4.9442	4.3174	-0.0712	90.71	74.3015	1.2173	-3.5166	0.6151	0.2556	1.4242	7.2067	7.2114	4.555	5.3591	6.2085	4.4172	1.0211	-1.6373	-1.5078	-2.0003	-1.9214	0.372	98.6925	2.034	0.2877	2.3026	9.2103	4.6052
S127WTS052	Codilean et al. 2022	27437.7		3.3911	9.1808	0.2555	0.4659	0.5955	3.9304	5.0891	5.2192	46.4689	70.3573	93.1182	4.4247	4.8784	5.2837	0.1574	0.2633	0.3336	6.1731	4.5892	4.1578	-0.7966	25.945	10.1827	0.6601	-2.2759	0.3705	0.2328	1.316	6.5421	6.5687	3.1936	4.294	5.184	3.3795	-0.7207	-0.8167	-0.7835	-1.3827	-1.3425	1.0768	0	7.171	0.1508	2.3026	9.2103	4.6052
S230WTS021	Codilean et al. 2022	485.956		7.4247	8.773	0.44902	0.7378	0.8941	4.633	5.4426	5.5752	93.0715	132.526	170.335	5.7762	6.1782	6.3988	0.3379	0.5253	0.6343	4.7058	4.1992	3.3037	-0.1717	0	5.8888	0.3933	-1.618	0.1249	0.2057	1.3314	6.72	6.7724	5.2149	6.4839	6.893	5.5936	-0.71	-0.1299	-0.1426	-0.6486	-0.6665	2.0693	38.8674	6.46	2.9588	6.784	13.0821	6.0096
S023WTS007	Codilean et al. 2022	8284.87		4.5886	8.8506	0.04956	0.1265	0.2396	3.1997	4.814	4.934	15.5289	25.9395	42.4654	3.1234	3.4848	3.715	0.0433	0.0714	0.1437	5.7635	3.9658	3.387	-1.3176	7.619	7.0626	0.424	-2.2857	0.1792	0.1639	1.1011	5.9924	5.9125	1.3169	2.5136	4.7587	2.6754	-2.1794	-1.4753	-1.2874	-1.9296	-1.8109	0.5573	8.8835	6.18	2.4657	3.5025	9.2103	5.1847
S207WTS034	Codilean et al. 2022	508.331		7.3797	8.5195	0.46294	0.7588	0.9583	4.7343	5.5385	5.6955	98.3017	141.634	187.685	5.764	6.2591	6.5205	0.3684	0.5681	0.6866	6.2675	4.5103	3.5803	0.3608	23.624	36.479	0.7507	-1.918	0.2524	0.2603	1.3669	7.0677	6.9768	5.1271	6.028	7.0391	5.3954	0.2036	-0.7363	-0.6911	-1.262	-1.2266	0.8666	38.5652	6.983	3.6574	6.5817	12.3693	5.9157
S023WTS006	Codilean et al. 2022	12595.1		4.1698	8.8568	0.06811	0.1555	0.2797	3.2784	4.8468	4.9828	17.9123	28.8862	43.7836	3.1504	3.5925	3.9901	0.0517	0.0971	0.1575	5.539	4.007	3.4612	-1.2982	16.149	15.3389	0.353	-2.3602	0.2208	0.1583	1.1026	6.0265	5.8854	1.0289	2.3983	4.7216	2.6392	-2.0794	-1.4837	-1.3134	-1.9407	-1.8357	0.5785	19.9546	7.013	3.2008	3.4719	9.2103	5.1372
S140WTS010	Codilean et al. 2022	503.233		7.3898	8.9983	0.44733	0.7179	0.8864	4.8442	5.6156	5.8775	102.48	144.68	196.862	6.0495	6.4824	7.0032	0.3354	0.5097	0.6253	6.5964	5.1915	4.3798	0.2086	49.614	54.8239	0.99	-2.6927	0.4178	0.2715	1.4288	7.3883	7.7783	5.5499	6.6919	6.9949	5.5799	1.2062	-0.244	-0.1539	-0.7565	-0.6906	1.2746	94.1262	3.369	1.0991	6.5308	11.7229	5.4758
S156WTS002	Codilean et al. 2022	147627		1.7084	8.7943	0.07044	0.1235	0.2056	2.817	4.7058	4.7658	10.541	15.4612	33.1725	3.4185	3.85	4.1539	0.0301	0.041	0.0791	7.4686	4.8184	4.1782	-0.0132	94.89	75.5897	1.16	-3.673	0.6048	0.2572	1.4537	7.1481	7.1594	4.4897	5.2053	6.2534	4.3887	0.9938	-1.7678	-1.7093	-2.0786	-2.0464	0.3417	83.4895	2.717	0	2.3026	9.2103	4.6052
S061WTS009	Codilean et al. 2022	10833.6		4.3204	8.2507	0.31993	0.5225	0.6674	4.0231	5.1366	5.2441	52.3696	77.6725	101.908	4.0993	4.45	4.7902	0.1808	0.2924	0.3744	6.6446	4.577	4.2294	-0.6149	27.555	20.6925	1.1168	-2.2368	0.5042	0.2287	1.3104	6.7019	6.728	1.985	2.9936	5.0649	3.1422	-0.0971	-1.1258	-1.0735	-1.5693	-1.5246	1.0437	0	7.396	0.4117	2.3026	9.2103	4.6052
S061WTS010	Codilean et al. 2022	5638.67		4.9734	8.2507	0.31993	0.5225	0.6674	4.0231	5.1366	5.2441	52.3696	77.6725	101.908	4.0993	4.45	4.7902	0.1808	0.2924	0.3744	6.6446	4.577	4.2294	-0.6149	27.555	20.6925	1.1168	-2.2368	0.5042	0.2287	1.3104	6.7019	6.728	1.985	2.9936	5.0649	3.1422	-0.0971	-1.1258	-1.0735	-1.5693	-1.5246	1.0437	0	7.396	0.4117	2.3026	9.2103	4.6052
S010WTS029	Codilean et al. 2022	20106.1		3.702	7.6276	0.23216	0.3847	0.542	3.8657	5.0964	5.2308	40.2349	59.7033	87.704	4.685	5.1536	5.567	0.1442	0.2236	0.3072	6.2466	4.1609	3.3206	-0.2775	85.607	94.8687	1.1847	-3.1419	0.546	0.2017	1.2201	6.7004	6.8222	3.5192	4.4038	6.3875	4.6855	0.3499	-1.5269	-1.4697	-1.9491	-1.9139	0.4907	96.9253	2.227	0.6397	5.6861	9.2103	5.7112
S188WTS032	Codilean et al. 2022	15581.3		3.957	8.3519	0.36772	0.6416	0.7879	4.5716	5.4301	5.5363	79.1795	117.733	154.274	5.1516	5.6028	5.795	0.2557	0.4035	0.5036	5.4231	4.2941	3.9317	-0.9736	13.112	15.5155	0.7288	-2.0114	0.338	0.2234	1.2827	6.1946	6.0812	2.5898	4.2127	5.2826	3.9189	-1.3585	-0.1803	-0.1704	-0.7218	-0.7079	1.5618	13.1091	8.443	3.145	2.3026	9.2103	4.6052
S038WTS030	Codilean et al. 2022	111937		1.9851	8.2082	0.0439	0.088	0.1626	2.8946	4.7282	4.7892	10.3427	15.7273	24.4163	2.8422	3.0521	3.2835	0.021	0.0365	0.0647	6.1251	4.2066	3.674	-1.3589	0.354	0.4286	0.4218	-1.9827	0.2752	0.1746	1.1078	6.1927	6.2433	0.7738	2.0898	4.7712	2.744	-1.6769	-1.762	-1.655	-2.0834	-2.0303	0.2705	98.7275	3.667	0.8209	2.3026	9.2103	4.6052
S048WTS006	Codilean et al. 2022	33940		3.1785	7.8026	0.26563	0.4107	0.6249	4.2042	5.2626	5.7048	50.0924	78.7193	135.748	4.2202	4.6538	5.4413	0.1372	0.2458	0.3941	6.0966	3.8511	3.2726	-1.355	0	0.6176	0.1215	-1.2881	0.113	0.2153	1.262	5.8315	5.6373	-0.1985	1.4139	4.7008	2.6515	-2.6165	0.172	0.2211	-0.3766	-0.3129	1.2267	28.6711	7.64	3.9149	4.2091	9.2103	4.6782
S273WTS006	Codilean et al. 2022	285930		1.0473	7.6733	0.04912	0.0811	0.1214	2.7192	4.6782	4.7009	8.0649	12.2401	16.0541	2.8021	3.0509	3.1004	0.0298	0.0456	0.0638	6.5948	4.4202	3.9165	-0.586	0.261	0.0326	0.7508	-2.1919	0.4056	0.2226	1.2465	6.7558	6.6695	2.18	3.0478	5.4113	3.5339	-0.3823	-2.1078	-2.0883	-2.2266	-2.2182	0.2535	20.0413	6.033	0	2.3026	9.2103	4.6052
S273WTS007	Codilean et al. 2022	241095		1.2179	7.6733	0.04912	0.0811	0.1214	2.7192	4.6782	4.7009	8.0649	12.2401	16.0541	2.8021	3.0509	3.1004	0.0298	0.0456	0.0638	6.5948	4.4202	3.9165	-0.586	0.261	0.0326	0.7508	-2.1919	0.4056	0.2226	1.2465	6.7558	6.6695	2.18	3.0478	5.4113	3.5339	-0.3823	-2.1078	-2.0883	-2.2266	-2.2182	0.2535	20.0413	6.033	0	2.3026	9.2103	4.6052
S140WTS009	Codilean et al. 2022	1253.6		6.477	7.651	0.46137	0.6967	0.8384	4.8374	5.5368	5.7862	102.769	138.896	185.368	6.044	6.3821	6.9761	0.337	0.4851	0.5722	6.5646	5.4111	4.5686	0.4442	69.389	69.0561	1.1129	-2.9431	0.5576	0.2827	1.4541	7.6479	7.9602	4.4678	5.578	7.2069	5.7723	1.9062	-0.1461	-0.1169	-0.6553	-0.6251	1.3158	92.5973	3.701	1.3502	6.0336	11.5052	5.083
S086WTS022	Codilean et al. 2022	148.514		8.6101	7.615	0.58527	0.7648	0.9649	4.8801	5.6269	5.8292	115.209	164.525	227.023	6.4258	6.808	7.4845	0.366	0.5784	0.7309	5.0332	4.6197	3.8578	-0.4829	8.475	13.6047	0.4465	-2.0518	0.1113	0.2668	1.4159	6.3832	7.252	4.1211	5.3877	6.9213	5.6215	-0.5713	-0.1761	-0.1967	-0.7877	-0.7853	1.5104	99.4624	3.03	0.1022	6.4806	12.906	5.992
S108WTS027	Codilean et al. 2022	757.335		6.981	7.6282	0.50157	0.7626	0.9674	4.8422	5.6174	5.8688	104.385	154.705	223.905	5.9417	6.3265	6.8398	0.3231	0.5269	0.6562	5.7389	4.4471	3.8806	-0.6653	35.331	38.5037	0.9652	-2.6809	0.2469	0.2781	1.4563	6.2937	6.8931	3.4429	4.3701	6.324	4.6545	-0.6647	-0.5077	-0.4217	-1.0219	-0.9647	1.1329	93.3522	3.002	1.9806	5.1247	12.7245	5.7919
S273WTS002	Codilean et al. 2022	395583		0.7227	7.6589	0.0463	0.0767	0.1128	2.9703	4.7568	4.8109	10.7202	16.1977	23.1165	3.111	3.4442	3.9842	0.0306	0.0466	0.0684	6.6293	4.3947	3.8706	-0.6128	0.933	0.0393	0.6545	-2.2266	0.3876	0.2199	1.2204	6.7512	6.6483	1.984	2.7737	5.3144	3.3567	-0.4678	-2.1244	-2.0972	-2.2229	-2.21	0.1305	9.1571	5.984	0	2.3026	9.2103	4.6052
S094WTS011	Codilean et al. 2022	17264.8		3.8544	7.5422	0.3584	0.5738	0.6784	4.5033	5.4047	5.6069	69.9796	105.227	146.178	4.9723	5.4974	5.8638	0.2406	0.3913	0.5068	7.718	4.4766	3.638	-1.4214	0	0.817	0.3315	-1.6054	0.1729	0.1934	1.2127	5.7271	5.7741	2.1589	3.2359	5.4701	3.7652	-2.3936	0.3743	0.3939	-0.2305	-0.206	1.6191	71.6765	5.177	1.667	6.1067	9.2103	5.2895
S076WTS020	Codilean et al. 2022	981.772		6.7215	7.5993	0.43059	0.6438	0.8143	4.6949	5.4831	5.7329	85.7602	125.993	172.294	6.1236	6.3387	7.076	0.2807	0.4492	0.5872	5.5308	4.6472	3.8445	-0.5875	8.589	18.5232	0.748	-1.5784	0.1329	0.2695	1.4313	6.3497	7.468	4.3246	5.5456	7.1201	5.7886	-0.4095	-0.3801	-0.2168	-0.9281	-0.799	1.6301	62.4058	4.295	2.6618	6.3358	11.3627	5.968
S094WTS019	Codilean et al. 2022	4654.71		5.1652	7.4264	0.33877	0.6077	0.7777	4.3297	5.3224	5.5026	68.4789	108.441	151.501	5.5243	6.066	6.3476	0.2334	0.4075	0.5386	9.1132	5.0825	4.0848	-0.4174	18.333	28.5436	0.8154	-1.3164	0.2558	0.1877	1.2525	6.7505	6.9875	4.1236	5.0419	7.0861	5.4612	-0.3715	-0.0186	0.0073	-0.7195	-0.6832	1.2652	74.6705	5.898	3.2656	7.4665	9.9356	5.6519
S159WTS006	Codilean et al. 2022	302937		0.9895	7.8467	0.04516	0.0857	0.1335	3.1564	4.7942	4.8691	13.4684	19.5173	29.7002	3.919	4.1466	4.764	0.0266	0.0437	0.0631	7.4466	4.4951	4.0931	-0.1991	2.415	12.9743	1.1515	-1.9491	0.523	0.2358	1.2514	7.1635	7.2244	3.373	4.0419	6.1008	4.1824	0.6946	-1.7539	-1.5828	-1.9958	-1.8826	0.6344	100	2.634	0	2.3026	9.2103	4.6052
S149WTS021	Codilean et al. 2022	17638.5		3.833	7.8154	0.13831	0.2838	0.4212	3.2948	4.925	5.0341	27.8761	51.9162	69.2593	4.0402	4.6202	5.0006	0.0784	0.1691	0.2452	8.7354	5.4203	4.7033	0.5137	25.376	69.1068	1.321	-2.2182	0.5858	0.3016	1.5526	7.9009	7.6601	4.3368	5.1495	6.9427	5.2107	1.7754	-0.602	-0.4371	-1.1379	-0.9846	1.0934	89.9747	3.682	1.491	2.3026	9.2103	4.6052
S226WTS002	Codilean et al. 2022	31318.2		3.2589	7.643	0.25419	0.4513	0.5561	4.0974	5.1945	5.3172	48.5175	76.1913	98.3226	4.5339	5.0444	5.3501	0.1684	0.2825	0.3627	6.4775	4.175	3.6174	-1.6696	0	1.1106	0.1104	-1.4106	0.1129	0.2495	1.3622	5.5969	6.3707	2.4003	3.4182	5.5569	3.8323	-2.2276	-0.7689	-0.7176	-1.2507	-1.2043	1.0266	67.2624	4.815	3.2554	3.8241	9.2103	4.7529
S151WTS013	Codilean et al. 2022	611.677		7.1946	7.6451	0.53669	0.7876	0.9362	4.5395	5.3779	5.4775	97.8291	138.182	171.85	5.7316	6.175	6.3665	0.3323	0.5061	0.6148	8.4333	5.7104	4.7755	1.0848	91.664	73.3278	1.5465	-2.7504	0.7009	0.3204	1.363	8.0035	7.8911	4.7601	5.5266	7.4855	5.728	2.7089	-0.1764	-0.1916	-0.6123	-0.6351	2.0557	3.6245	5.289	0.2587	4.9919	9.2103	4.6218
S108WTS006	Codilean et al. 2022	1290.54		6.448	7.5702	0.5281	0.7634	0.9299	4.8414	5.6102	5.7887	106.162	147.97	203.261	5.6801	6.1829	6.4332	0.3444	0.5248	0.6315	5.5772	4.3462	3.7714	-0.7822	40.269	43.3044	0.7459	-2.5282	0.2979	0.2703	1.4355	6.193	6.6085	3.0149	4.0775	6.029	4.4423	-0.8649	-0.5319	-0.4647	-1.0303	-0.9859	1.1113	83.6116	2.842	0	4.7194	11.4165	5.7737
S082WTS004	Codilean et al. 2022	1837.76		6.0945	7.6437	0.44587	0.6685	0.8037	4.6308	5.4376	5.5716	82.3905	115.409	156.494	5.3069	5.7042	5.9442	0.2676	0.4089	0.4911	6.9961	4.6234	4.2392	-0.9192	37.938	44.8462	0.9951	-2.2897	0.4852	0.2466	1.3079	6.3791	7.0373	2.7504	3.8034	5.7857	4.1453	-0.1133	-0.1635	-0.303	-0.7881	-0.8889	1.0783	7.8549	7.152	0.0886	3.4751	9.2103	4.6937
S135WTS004	Codilean et al. 2022	1732.32		6.1536	7.8078	0.35465	0.5983	0.7602	4.6261	5.4382	5.5366	78.5577	119.503	159.935	5.6703	6.1114	6.4452	0.2403	0.3919	0.4974	8.0586	4.8015	4.1592	0.4155	61.832	39.2209	0.9287	-2.678	0.5086	0.2498	1.3097	7.4858	7.6616	4.8232	5.3056	7.3982	5.3659	1.5005	-0.2961	-0.3053	-0.8759	-0.8814	1.4263	9.3653	6.532	0	2.3026	9.2103	4.6052
S074WTS010	Codilean et al. 2022	2076.92		5.9722	9.2328	0.227	0.4886	0.6789	3.9651	5.1988	5.4369	49.4077	88.9095	126.452	5.0119	5.5733	6.1351	0.1302	0.2788	0.4017	8.3787	5.0943	4.4398	1.0821	71.431	87.0274	1.411	-2.4841	0.5896	0.2752	1.336	8.0763	8.1993	6.9236	7.2194	8.0722	5.8658	2.681	0.0604	0.0479	-0.485	-0.4897	1.2725	37.7824	6.03	2.7458	6.9135	9.3168	4.6071
S016WTS004	Codilean et al. 2022	513.426		7.3697	8.9281	0.51714	0.7349	0.8959	4.7169	5.5208	5.7131	97.9544	136.153	185.178	5.8639	6.326	6.7051	0.3339	0.5027	0.6239	7.1329	4.9456	4.2145	0.1259	26.742	37.8775	1.1032	-2.2887	0.3058	0.2402	1.3716	7.2269	7.365	5.1228	6.2772	6.6758	5.25	0.4967	-0.2013	-0.2229	-0.807	-0.8219	1.5726	51.43	4.898	2.4329	6.7562	12.1426	5.6774
S038WTS027	Codilean et al. 2022	95533.4		2.1436	9.075	0.0695	0.1481	0.2669	3.0644	4.7816	4.85	13.682	21.6855	32.7082	3.0201	3.2876	3.6348	0.0312	0.0569	0.0981	6.0871	4.2272	3.7158	-1.421	0.229	2.012	0.405	-1.9907	0.2622	0.175	1.131	6.1127	6.1874	1.6679	2.9074	4.7783	2.7324	-1.8061	-1.7638	-1.6906	-2.081	-2.0456	0.2705	95.775	3.731	1.6535	2.3026	9.2103	4.6052
S094WTS002	Codilean et al. 2022	23256.3		3.5565	8.9544	0.41336	0.6362	0.7185	4.6978	5.5135	5.6256	88.0206	128.486	171.894	4.4916	4.8839	5.1525	0.292	0.4655	0.5517	5.9807	4.2231	3.5404	-1.813	0	1.3792	0.0886	-0.9274	0.0956	0.1823	1.2511	5.2602	5.1042	1.5567	2.939	4.7795	2.7876	-3.4682	0.2875	0.2812	-0.2735	-0.278	1.404	74.9864	4.859	2.4826	5.7113	9.798	5.6722
S178WST007	Codilean et al. 2022	23262.9		3.5562	8.9538	0.41478	0.6363	0.7185	4.698	5.5135	5.6256	88.0257	128.494	171.892	4.4917	4.8839	5.1524	0.2921	0.4656	0.5517	5.9807	4.2231	3.5404	-1.8128	0	1.3805	0.0886	-0.9276	0.0956	0.1829	1.2528	5.2604	5.1036	1.5567	2.939	4.7796	2.7878	-3.4685	0.2875	0.2812	-0.2735	-0.278	1.404	74.9845	4.861	2.4825	5.7091	9.7946	5.6716
S201WTS009	Codilean et al. 2022	8455.07		4.5683	7.2907	0.20003	0.3945	0.5038	3.6188	5.0345	5.1585	38.0963	67.4193	90.5621	3.8686	4.483	4.6201	0.1289	0.2514	0.3419	7.1331	4.4167	3.6253	-0.6937	6.074	6.5381	0.6997	-2.0683	0.4704	0.2234	1.2848	6.6743	6.5987	2.319	3.4892	5.7188	4.1618	-0.3561	-0.2917	-0.1929	-0.8496	-0.743	1.5287	67.5167	5.312	3.4772	4.9234	9.2103	4.6267
S273WTS001	Codilean et al. 2022	119137		1.9228	7.5882	0.15682	0.2955	0.4308	3.6556	4.9451	5.0463	30.6306	47.1463	64.2242	4.0188	4.3424	4.6977	0.1019	0.1757	0.2486	6.6003	4.5012	3.9525	-0.5385	18.035	13.7	0.726	-2.3539	0.4235	0.2185	1.2651	6.8213	6.7113	1.7447	2.9739	5.2306	3.539	-0.2635	-2.0526	-2.0604	-2.1813	-2.1848	0.0824	15.7006	3.744	0	2.3026	9.2103	4.6052
S123WTS014	Codilean et al. 2022	10621.7		4.3402	7.6744	0.20203	0.4077	0.5702	4.2338	5.2739	5.4672	50.7362	81.3568	126.838	3.643	3.8791	4.1573	0.1273	0.238	0.3217	5.2471	3.5703	2.9474	-2.086	0	0.0073	0.1031	-1.3209	0.0668	0.162	1.1454	4.9555	5.1165	-2.0956	-0.997	4.6209	2.3431	-3.7408	0.4124	0.4382	-0.1944	-0.1603	1.3728	11.919	10.304	4.4807	2.3026	9.2103	4.6052
S137WTS013	Codilean et al. 2022	4859.85		5.1221	7.1354	0.28509	0.5472	0.665	4.0857	5.2511	5.3617	57.9569	94.133	124.828	4.8309	5.3439	5.5868	0.1892	0.3574	0.441	6.7216	4.5553	3.7944	-0.1241	40.128	61.1057	1.1833	-2.2557	0.5057	0.2677	1.3467	6.9342	6.8018	3.0453	3.6258	6.3784	4.4041	0.3443	-1.0756	-1.02	-1.6094	-1.5626	0.8647	46.6496	6.076	3.145	5.2411	9.2103	5.0817
S136WTS012	Codilean et al. 2022	19337.9		3.741	7.1254	0.23468	0.4695	0.5874	3.3289	4.8765	4.9358	32.8022	58.079	75.3264	3.8575	4.2545	4.4726	0.13	0.2558	0.3381	6.4061	4.3455	3.5439	-0.1917	46.01	44.7502	0.81	-2.4546	0.4962	0.2468	1.2801	6.8172	7.1033	3.152	3.8055	6.4756	4.5718	0.5265	-1.675	-1.6681	-2.0295	-2.0272	0.4704	0.1239	8.322	3.0308	5.4131	9.2103	4.821
S188WTS018	Codilean et al. 2022	12959.6		4.1412	7.7116	0.39151	0.6501	0.7721	4.8477	5.6451	5.807	92.9926	137.49	201.984	5.8763	6.4376	6.6173	0.2774	0.4465	0.5489	4.688	4.0777	3.4531	-0.7161	4.118	0.3456	0.3714	-1.837	0.2038	0.2382	1.3299	6.3438	6.2196	2.9362	4.4319	5.8711	4.6384	-1.3934	-0.0151	-0.0042	-0.5754	-0.5674	1.7525	89.1747	4.031	1.4409	5.4939	9.5839	4.6578
S143WTS022	Codilean et al. 2022	1340.12		6.4103	7.0455	0.22658	0.3656	0.4698	3.7463	5.0015	5.0549	41.4087	58.0762	70.8485	4.3515	4.5894	4.732	0.1635	0.2372	0.2893	7.9065	4.7848	4.0282	0.3747	77.876	71.3482	1.1805	-3.1281	0.5879	0.2584	1.4494	7.2802	7.1292	3.3366	3.918	6.6983	4.7403	1.2196	-0.492	-0.3813	-1.018	-0.9246	1.0954	1.8604	11.563	4.55	4.8423	9.2103	4.6795
S188WTS024	Codilean et al. 2022	24224.1		3.5157	7.7169	0.37373	0.626	0.7369	4.7178	5.5372	5.6366	82.2546	121.436	171.903	5.9066	6.3396	6.5058	0.2501	0.3935	0.4883	4.6422	4.1469	3.587	-0.9778	0.75	1.1999	0.4301	-1.6555	0.222	0.22	1.2623	6.0032	6.135	3.4097	4.9459	6.2282	5.108	-1.618	-0.0387	-0.0337	-0.5944	-0.5895	1.774	79.0345	4.114	0.6859	2.3026	9.2103	4.6052
S156WTS019	Codilean et al. 2022	94536		2.1541	7.2996	0.15653	0.298	0.3981	3.1526	4.8231	4.8795	21.8796	36.9032	49.3151	3.7557	4.2564	4.4869	0.0759	0.1392	0.1913	7.448	4.8498	4.2685	0.093	98.646	84.8803	1.3404	-3.8825	0.6424	0.2727	1.425	7.223	7.2142	3.3171	4.04	6.4782	4.6369	1.2198	-1.5521	-1.5573	-1.9907	-1.99	0.4893	100	2.444	0	4.3855	9.2103	4.6097
S165WTS038	Codilean et al. 2022	1418.62		6.3534	6.3445	0.27435	0.4975	0.6231	3.7026	4.9626	5.0303	43.534	63.307	79.2356	4.1884	4.5305	4.5465	0.183	0.2882	0.3611	6.959	4.7084	3.9552	0.2749	73.126	74.3631	1.235	-2.974	0.5943	0.2557	1.4448	7.2571	6.9472	2.2472	2.8388	6.3018	4.3328	1.0041	-0.4142	-0.2539	-0.9076	-0.7956	1.1324	0	11.212	4.4669	4.4543	9.2103	4.6556
S257WTS018	Codilean et al. 2022	105284		2.0464	6.8031	0.06281	0.1121	0.2523	2.839	4.701	4.7242	11.4521	18.7115	26.1438	2.6534	2.7713	2.7957	0.042	0.0769	0.1238	6.2244	4.3573	3.7307	-0.6986	2.237	0.0091	0.5426	-2.107	0.3504	0.2235	1.2595	6.7162	6.5961	-0.5379	0.1345	4.7716	2.5601	-0.6749	-1.8477	-1.803	-2.1396	-2.1194	0.1055	0.0259	5.429	0	2.3026	9.2103	4.6052
S135WTS010	Codilean et al. 2022	13975.3		4.0658	7.0707	0.22487	0.3669	0.504	4.2261	5.2016	5.308	50.2507	73.4178	100.826	4.9519	5.3836	5.5703	0.1565	0.2392	0.2977	6.5871	4.5967	3.8635	0.2431	80.738	20.6017	1.0533	-2.6766	0.5316	0.2397	1.2368	7.3689	7.213	3.2172	3.7355	6.5744	4.5544	1.0444	-0.5926	-0.6062	-0.9999	-0.9951	1.4442	0	7	0	2.3026	9.2103	4.6052
S127WTS024	Codilean et al. 2022	15844.8		3.9402	6.9618	0.17988	0.3556	0.4675	3.7873	5.0123	5.1156	35.9385	53.9736	74.6739	4.0493	4.294	4.9173	0.1137	0.1925	0.2449	5.8639	4.093	3.7668	-1.123	0.164	0.0161	0.3109	-1.7725	0.2101	0.234	1.3364	6.1457	6.2151	0.7528	2.2361	5.0607	3.4329	-1.691	-0.8524	-0.7282	-1.2903	-1.1838	1.0727	39.5853	5.824	0	2.7157	9.2103	4.6135
S140WTS005	Codilean et al. 2022	450.527		7.5004	6.8105	0.37037	0.6801	0.8806	4.5685	5.4121	5.7409	82.177	121.372	167.785	5.7711	6.0876	7.0282	0.2782	0.4586	0.6096	5.5527	4.6541	3.8832	-0.7385	1.756	24.8288	0.2607	-2.4024	0.0926	0.2669	1.4209	6.0704	7.6647	3.5715	4.6894	7.1017	5.6695	-0.461	-0.3321	-0.1579	-0.8324	-0.7121	1.2691	85.5855	4.495	1.7647	7.2577	12.8675	6.0983
S127WTS003	Codilean et al. 2022	24383.6		3.5092	6.9492	0.28246	0.4794	0.5809	3.8165	5.0119	5.0888	43.5629	64.3771	82.8393	4.2665	4.6187	4.6773	0.1536	0.2507	0.3128	6.6305	4.3024	3.7737	-0.7333	9.572	1.8201	0.3713	-2.2127	0.2813	0.2363	1.2983	6.622	6.6591	1.2565	2.5579	5.2821	3.6705	-0.8275	-0.767	-0.7369	-1.3284	-1.2943	1.1546	0	6.27	0	2.3026	9.2103	4.6052
S143WTS014	Codilean et al. 2022	2021.43		5.9993	6.2713	0.50996	0.7885	0.9496	4.6881	5.4799	5.6427	105.759	146.299	185.74	5.628	5.9307	6.2044	0.3859	0.5643	0.6584	6.8397	4.6769	3.76	0.3011	21.022	60.7589	0.8612	-1.849	0.3136	0.2728	1.4701	7.1093	6.8605	2.7544	3.5666	6.7884	5.0485	0.2179	-1.0467	-1.0317	-1.5507	-1.538	0.7227	99.5111	2.579	0.398	5.8963	9.6774	5.7659
S037WTS029	Codilean et al. 2022	2020.08		5.9999	6.2507	0.56901	0.7998	0.9593	4.3893	5.2631	5.3954	94.6339	129.845	160.14	5.2993	5.7959	5.9065	0.3731	0.5397	0.6342	6.9872	4.8076	3.9789	0.0954	27.669	68.999	0.892	-2.1724	0.4115	0.2764	1.4049	6.9328	7.0334	3.0495	3.6912	7.0703	5.1819	0.4646	-1.2003	-1.1641	-1.6466	-1.6251	0.7875	96.981	2.797	1.391	5.633	9.9981	5.6558
S127WTS006	Codilean et al. 2022	123657		1.8856	6.9562	0.24035	0.453	0.5876	3.9485	5.1219	5.2962	46.4776	71.5836	93.6336	4.8999	5.3655	5.7861	0.1603	0.2764	0.3488	5.9784	4.5842	4.2019	-0.7094	5.576	0.4667	0.5033	-2.1447	0.316	0.2474	1.3661	6.6238	6.7453	2.4367	3.4388	6.0249	4.3846	-0.6449	-1.0084	-0.9639	-1.5348	-1.4921	1.085	0	7.013	0	2.3026	9.2103	4.6052
S220WTS005	Codilean et al. 2022	1841.04		6.0927	6.4315	0.28231	0.3992	0.479	3.7834	5.0507	5.1251	49.1218	70.0135	86.7106	4.6112	4.9208	5.3306	0.1914	0.2856	0.325	8.3923	4.9469	3.8582	0.3086	99.391	94.018	1.5532	-3.6045	0.7433	0.2011	1.3536	7.4254	7.4588	3.3399	4.156	7.1962	5.4779	1.857	-0.0714	-0.0586	-0.8117	-0.7861	1.8012	53.7851	4.512	0	2.3026	9.2103	4.6052
S010WTS031	Codilean et al. 2022	8779.36		4.5307	8.4884	0.3738	0.5752	0.6726	4.1883	5.2188	5.3237	65.0321	93.61	123.06	5.018	5.4087	5.682	0.2423	0.3771	0.4589	6.3862	4.1375	3.3126	-0.5677	61.272	82.1754	1.0299	-2.5434	0.432	0.2058	1.2355	6.4216	6.7893	4.2367	5.3342	6.292	4.7739	-0.1967	-1.5362	-1.5219	-1.9533	-1.9421	0.5017	99.3845	2.056	0.4426	5.7863	9.2103	5.7605
S108WTS013	Codilean et al. 2022	1327.37		6.4199	8.9653	0.50594	0.7414	0.9055	4.8144	5.5628	5.7743	103.777	143.882	198.291	5.8129	6.1926	6.6583	0.3359	0.5101	0.6165	6.1072	4.7213	4.0885	-0.2973	59.61	58.8568	1.1463	-2.8151	0.4336	0.2764	1.4225	6.8129	7.0397	4.6099	5.6772	6.2145	4.6589	0.2283	-0.4427	-0.3888	-0.9589	-0.9211	1.175	81.2564	3.145	2.0474	4.8738	11.7035	5.461
S127WTS057	Codilean et al. 2022	11021.1		4.3033	9.1102	0.24732	0.4663	0.5957	4.0193	5.1787	5.324	49.4607	77.7389	105.353	4.6847	5.0922	5.5454	0.1546	0.2713	0.3502	6.3755	4.3234	3.7928	-0.648	2.806	0.4631	0.3787	-2.0212	0.2563	0.2391	1.3145	6.6905	6.598	3.8147	4.9807	5.547	3.9367	-0.8801	-1.0309	-0.9763	-1.4541	-1.4094	1.1818	0.0863	7.211	0.3109	2.3026	9.2103	4.6052
S127WTS007	Codilean et al. 2022	5510.55		4.9964	9.0979	0.26019	0.4835	0.6167	4.0344	5.1922	5.366	51.089	81.2818	112.182	4.4507	4.9612	5.3893	0.163	0.2881	0.3793	6.5352	4.1381	3.7171	-0.9298	2.934	0.298	0.3174	-1.9065	0.215	0.2442	1.3602	6.3676	6.3404	3.0769	4.5856	5.1688	3.6409	-1.4235	-0.811	-0.751	-1.2755	-1.2147	1.1516	18.2291	6.457	0	2.7109	9.2103	4.6063
S009WTS058	Codilean et al. 2022	13677.4		4.0873	8.4976	0.09933	0.2209	0.321	3.3833	4.8775	4.9567	21.6779	32.8169	47.1015	3.9495	4.3626	4.6293	0.069	0.1183	0.1615	6.6854	4.4259	3.7226	-0.0419	30.746	40.4602	1.1557	-2.3958	0.6062	0.2796	1.3284	6.8871	6.9026	3.8847	4.2917	6.0084	3.8683	0.7554	-1.25	-1.2417	-1.7585	-1.7499	0.4963	82.8131	3.224	1.4487	4.5445	9.2103	4.7476
S023WTS014	Codilean et al. 2022	7127.61		4.7391	8.779	0.05052	0.1291	0.2448	3.2137	4.8231	4.9436	15.8931	26.8919	43.5209	3.1295	3.5082	3.7216	0.044	0.073	0.1481	5.7854	3.9618	3.3841	-1.3055	8.172	7.5773	0.4436	-2.2916	0.182	0.1649	1.1011	6.0006	5.9161	1.2759	2.4922	4.7629	2.691	-2.1598	-1.4815	-1.2961	-1.9345	-1.8171	0.5476	9.5276	6.044	2.2724	3.5112	9.2103	5.2102
S135WTS022	Codilean et al. 2022	12867.5		4.1484	9.1799	0.23836	0.4315	0.6126	4.087	5.2143	5.3732	48.8265	78.395	110.781	5.0113	5.54	5.9534	0.1546	0.2607	0.3683	7.2326	4.6701	4.3866	0.2268	60.544	51.5363	1.3388	-2.5333	0.5858	0.2489	1.2355	7.4479	7.6512	5.5493	6.1355	6.8327	4.8842	1.549	-0.4522	-0.3849	-0.8389	-0.7804	1.3998	7.5291	6.896	2.0055	2.3026	9.2103	4.6052
S207WTS033	Codilean et al. 2022	479.821		7.4374	8.4457	0.469	0.7643	0.9625	4.7574	5.5519	5.7046	99.7072	143.111	190.07	5.7906	6.2898	6.5395	0.3746	0.5725	0.6906	6.259	4.5093	3.5798	0.3488	22.231	35.6196	0.7396	-1.8951	0.2391	0.2586	1.3661	7.0471	6.9575	5.0682	5.9842	7.0513	5.4225	0.1433	-0.7392	-0.6978	-1.2637	-1.2313	0.873	41.4549	6.696	3.5918	6.6114	12.4366	5.9329
S258WTS007	Codilean et al. 2022	2924.98		5.6298	9.1773	0.353	0.5984	0.7358	4.3801	5.3682	5.5047	68.4623	104.907	145.673	5.3776	5.9665	6.2744	0.2059	0.351	0.4394	7.8021	4.7859	4.2579	0.3467	51.78	59.9711	1.3305	-2.2789	0.535	0.2571	1.3498	7.4832	7.7065	5.9005	6.3098	7.1538	5.0487	1.5554	-0.4237	-0.3982	-0.9452	-0.9155	1.27	70.7418	3.669	2.0079	2.3026	9.2103	4.6052
S108WTS015	Codilean et al. 2022	1391.42		6.3727	8.9198	0.50574	0.7426	0.9088	4.8186	5.5703	5.7868	104.062	144.69	199.807	5.8106	6.1574	6.6695	0.3362	0.5128	0.6194	5.9727	4.6896	4.0672	-0.3419	58.523	57.6712	1.1008	-2.8101	0.4214	0.2752	1.4168	6.7591	6.9805	4.5021	5.5537	6.1645	4.5881	0.1117	-0.4496	-0.3945	-0.9652	-0.9271	1.1712	81.5662	3.171	2.0864	4.8757	11.7448	5.4854
S091WTS004	Codilean et al. 2022	94976.7		2.1494	8.1951	0.02426	0.0475	0.0852	2.7686	4.7044	4.7292	7.5683	11.8809	14.6051	3.1616	3.5308	3.6658	0.016	0.0279	0.045	6.7074	4.133	3.2438	-1.0093	1.177	0.1707	0.4416	-2.2036	0.3136	0.2318	1.2605	5.8712	5.6509	2.888	4.0713	5.5299	3.9282	-1.8183	-0.7038	-0.5241	-1.3532	-1.1692	1.1464	0	10.247	2.8934	4.0541	9.2103	5.2733
S094WTS003	Codilean et al. 2022	21592.5		3.6307	8.8749	0.4267	0.6435	0.7228	4.7345	5.5237	5.6336	91.1808	130.904	174.222	4.5092	4.8939	5.1529	0.3029	0.4724	0.5561	6.0442	4.2286	3.5441	-1.7903	0	1.4915	0.0883	-0.9223	0.0942	0.185	1.256	5.2871	5.1164	1.4836	2.8755	4.7803	2.7934	-3.444	0.2617	0.2469	-0.2987	-0.3105	1.3956	75.0745	4.841	2.4039	5.7114	9.8336	5.724
S178WST005	Codilean et al. 2022	21626.9		3.6291	8.8745	0.42815	0.6435	0.7228	4.7348	5.5238	5.6336	91.1845	130.898	174.219	4.5092	4.8939	5.153	0.3029	0.4724	0.5561	6.0442	4.2286	3.5441	-1.7901	0	1.4927	0.0883	-0.9226	0.0942	0.1856	1.2577	5.2873	5.1163	1.4836	2.8755	4.7804	2.7936	-3.444	0.2617	0.2469	-0.2987	-0.3105	1.3956	75.0798	4.842	2.4036	5.7092	9.83	5.7235
S108WTS018	Codilean et al. 2022	1333.69		6.4151	8.8994	0.50559	0.7432	0.91	4.818	5.5711	5.7892	103.809	144.536	199.631	5.8059	6.0987	6.6737	0.3359	0.5131	0.62	5.9491	4.6642	4.0486	-0.36	57.998	57.1102	1.1008	-2.8068	0.4159	0.2737	1.4122	6.7358	6.9652	4.4971	5.5427	6.1765	4.5962	0.0705	-0.4535	-0.3969	-0.9686	-0.9296	1.17	81.4707	3.17	2.0694	4.8758	11.7633	5.4971
S258WTS005	Codilean et al. 2022	4067.59		5.3	9.1273	0.31427	0.5346	0.6792	4.4619	5.4123	5.5315	67.6671	103.181	143.371	5.4161	5.9598	6.2505	0.2106	0.3434	0.4276	6.1462	4.5735	4.1612	0.0579	41.613	24.8081	1.1083	-2.4169	0.4962	0.2572	1.3307	7.1965	7.3435	5.3032	5.8687	6.6615	4.6874	0.9228	-0.4721	-0.4532	-0.8953	-0.8713	1.3419	16.4359	6.355	1.516	6.7602	9.2103	4.6067
S135WTS023	Codilean et al. 2022	3665.11		5.4042	9.1271	0.31357	0.5346	0.6792	4.4621	5.4123	5.5316	67.6972	103.194	143.396	5.4161	5.9599	6.2505	0.2107	0.3434	0.4275	6.1462	4.5735	4.1612	0.0578	41.605	24.8504	1.1083	-2.4169	0.4961	0.2572	1.3307	7.1962	7.3435	5.3032	5.8687	6.6617	4.6876	0.9225	-0.4721	-0.4532	-0.8953	-0.8713	1.3419	16.4287	6.355	1.5169	6.7602	9.2103	4.6067
S133WTS007	Codilean et al. 2022	51283.8		2.7657	8.9753	0.18761	0.3189	0.4133	3.0774	4.8049	4.9112	20.0814	35.7571	52.3328	3.6894	4.1562	4.7369	0.0664	0.1234	0.1914	7.7391	4.9284	4.4373	0.1414	25.264	10.442	1.088	-2.0549	0.5789	0.2966	1.4983	7.2744	7.2891	4.6901	5.6424	6.2712	4.6186	1.1554	-2.1013	-2.0826	-2.2247	-2.2164	0.0103	99.7394	2.026	0.2316	2.3026	9.2103	4.6052
S156WTS006	Codilean et al. 2022	163964		1.6034	8.7294	0.04694	0.0759	0.1462	2.6604	4.6616	4.7211	10.469	18.8825	44.2967	3.2764	3.6292	4.0902	0.0202	0.0243	0.0474	7.4958	4.9055	4.2885	-0.0482	85.379	73.3043	1.2388	-3.4738	0.6026	0.2512	1.4077	7.222	7.2314	4.5867	5.3266	6.3854	4.5526	1.0232	-1.3767	-1.2255	-1.9105	-1.8109	0.5529	98.0091	2.199	1.0956	2.3026	9.2103	4.6052
S038WTS014	Codilean et al. 2022	101482		2.0832	8.9704	0.0492	0.0671	0.2466	2.9669	4.7479	4.8234	13.2424	22.9866	40.5978	3.0361	3.2896	3.6496	0.029	0.0384	0.1334	5.8154	4.1706	3.671	-1.5424	0.473	3.4536	0.3673	-1.8618	0.2112	0.1409	1.112	5.9372	6.0051	1.5854	2.743	4.7816	2.7114	-2.1879	-1.8313	-1.7464	-2.0956	-2.051	0.2705	80.2722	4.279	2.7383	2.3026	9.2103	4.6052
S071WTS025	Codilean et al. 2022	13755.9		4.0816	8.7939	0.39637	0.6188	0.7138	4.0184	5.1712	5.3903	60.8997	90.5308	120.29	4.6653	5.2127	5.586	0.2282	0.3619	0.4572	6.2349	4.0427	3.3868	-0.2819	7.825	16.0462	0.4141	-1.6825	0.2352	0.2816	1.4571	6.5664	6.7072	4.2768	5.4583	6.0855	4.6139	-0.5623	-0.8931	-0.6706	-1.3521	-1.2334	0.8976	20.7271	6.901	2.7946	4.556	9.2477	5.862
S156WTS016	Codilean et al. 2022	81084.6		2.3076	8.7236	0.06753	0.1174	0.2183	2.7466	4.6961	4.7799	10.5901	18.0903	36.6489	3.4086	3.8957	4.3339	0.0288	0.039	0.0895	7.6202	4.8488	4.2606	0.1093	89.049	80.2412	1.1152	-3.5543	0.572	0.2638	1.4118	7.3337	7.3403	4.8138	5.5448	6.5825	4.7552	1.1569	-1.6114	-1.5173	-1.9519	-1.8905	0.4145	96.3042	2.001	0	2.3026	9.2103	4.6052
S009WTS028	Codilean et al. 2022	59438.4		2.6181	8.2674	0.03144	0.13	0.1946	2.733	4.6877	4.7089	9.6797	15.4934	20.1752	2.9858	3.1672	3.519	0.0392	0.0671	0.0946	6.625	4.2723	3.5342	-0.0056	18.768	41.6915	1.1195	-2.2	0.595	0.2875	1.4837	6.8082	6.9011	3.7858	4.3007	6.1049	4.0578	0.7526	-1.7946	-1.7453	-2.0387	-2.0099	0.3728	0	11.571	4.5264	2.3026	9.2103	4.6052
S071WTS032	Codilean et al. 2022	35993.8		3.1197	8.77	0.32425	0.5568	0.6682	3.8605	5.0951	5.1856	49.5624	75.6436	97.2138	4.3597	4.7937	4.9873	0.189	0.3061	0.3916	5.3846	4.0889	3.4022	-0.2969	7.148	5.9701	0.3201	-1.8122	0.2077	0.2793	1.4732	6.5607	6.4927	4.0554	4.9827	5.9362	4.2169	-0.8294	-0.8694	-0.3277	-1.2972	-1.0059	0.9095	18.2613	7.741	3.3457	4.4122	9.2256	5.8491
S136WTS009	Codilean et al. 2022	31869.4		3.2414	8.4141	0.17249	0.404	0.5381	3.212	4.8497	4.9204	28.6972	53.3595	69.7476	3.7771	4.1706	4.4541	0.0965	0.2152	0.3029	6.5204	4.3103	3.5143	-0.2835	33.939	30.1933	0.7575	-2.3096	0.4626	0.2433	1.2379	6.7605	6.9211	4.0937	4.7847	6.2351	4.3474	0.2127	-1.5564	-1.4992	-1.9697	-1.9324	0.4317	0.0361	8.647	3.3713	5.3298	9.2103	4.7392
S038WTS016	Codilean et al. 2022	99743		2.1005	8.8915	0.0503	0.0677	0.2601	2.9529	4.7444	4.8175	13.2626	23.2271	40.8717	2.9988	3.2565	3.6364	0.0298	0.0413	0.1402	5.8396	4.1751	3.6789	-1.5254	0.511	3.7338	0.3673	-1.9533	0.2176	0.1415	1.112	5.9602	6.0273	1.4642	2.6442	4.7747	2.7044	-2.1392	-1.8313	-1.7447	-2.0948	-2.0495	0.2705	81.1725	4.159	2.6485	2.3026	9.2103	4.6052
S094WTS010	Codilean et al. 2022	14797.5		4.0086	8.6804	0.35818	0.5784	0.6858	4.5008	5.4027	5.5826	70.8079	105.762	144.823	4.9398	5.3937	5.7492	0.2464	0.401	0.5048	7.5939	4.4751	3.6606	-1.3585	0.011	0.9335	0.3623	-1.5155	0.1867	0.1917	1.2144	5.7836	5.8002	3.3139	4.2657	5.5007	3.7094	-2.2873	0.3312	0.3431	-0.2777	-0.2599	1.601	70.0105	5.393	2.5677	6.1603	9.2103	5.3551
S009WTS052	Codilean et al. 2022	18112.9		3.8064	8.3042	0.03648	0.2746	0.3902	3.504	4.9207	5.0055	25.4603	39.7029	58.5524	4.1087	4.4993	4.7935	0.0833	0.1387	0.1991	6.5444	4.4234	3.6993	-0.0181	37.899	49.4351	1.1787	-2.4853	0.6075	0.2734	1.3198	6.8786	6.9295	3.8779	4.3139	6.1489	4.0391	0.8	-1.2655	-1.2563	-1.7678	-1.7603	0.5081	91.8333	2.797	1.2233	4.653	9.2103	4.8905
S076WTS011	Codilean et al. 2022	288.473		7.9462	8.4495	0.52634	0.7543	0.94	4.8387	5.6417	5.8733	106.441	157.374	213.017	6.2369	6.7439	7.2355	0.3428	0.5626	0.6895	5.7843	4.7754	4.0408	-0.4628	19.023	27.5096	0.7086	-2.0137	0.2206	0.2646	1.4242	6.5605	7.3864	5.2874	6.5165	7.2499	5.9329	-0.1558	-0.3253	-0.2736	-0.8987	-0.8458	1.5508	55.7618	5.04	2.5459	5.8901	11.5447	5.8068
S067WTS008	Codilean et al. 2022	2.71633e+06		-1.204	8.5224	0.0748	0.1325	0.2371	3.3903	4.8601	4.9435	19.0852	28.818	40.4069	2.8458	3.0397	3.2338	0.0577	0.0958	0.1429	4.8356	3.7617	3.1839	-2.2449	0	0.282	0	-0.6516	0.0823	0.1747	1.1154	4.7336	4.8799	-4.4228	-2.7489	4.6053	2.3053	-4.0244	0.0506	0.1625	-0.4936	-0.367	1.3178	23.8673	9.225	3.5357	2.8173	9.2103	4.6052
S126WTS001	Codilean et al. 2022	13604.3		4.0927	8.6469	0.42392	0.6715	0.7966	4.7921	5.6819	5.8913	92.0995	146.951	213.331	5.7711	6.4371	6.7899	0.2709	0.4727	0.6064	4.8067	4.0452	3.5005	-0.5878	2.6	1.1446	0.3985	-1.814	0.2205	0.248	1.3626	6.5152	6.3766	4.3733	5.4405	6.2766	4.7288	-1.1174	-0.0443	-0.0324	-0.6017	-0.5886	1.6685	73.2719	4.685	2.8298	4.8582	9.4014	4.6439
S120WTS001	Codilean et al. 2022	403416		0.7031	8.6807	0.04609	0.0905	0.117	2.4726	4.6384	4.6581	2.677	3.4173	5.5823	2.8609	3.0623	3.6406	0.0144	0.0237	0.0312	7.8386	4.9501	4.5856	0.2478	86.179	95.6212	1.5165	-2.7318	0.6249	0.2753	1.1558	7.4175	7.3495	4.1695	5.0252	6.0886	4.3291	1.4082	-2.1568	-2.0996	-2.2256	-2.1937	0.4125	100	2	0	2.3026	9.2103	4.6052
S164WTS001	Codilean et al. 2022	34110.5		3.1735	8.6459	0.09799	0.2267	0.5007	3.1694	4.8084	5.1091	28.4406	67.1239	99.6235	4.0109	4.2635	5.3317	0.0582	0.1223	0.3108	8.2692	4.9977	4.5005	0.1736	37.418	43.5103	1.1755	-2.2547	0.577	0.2804	1.4275	7.6719	7.6218	5.4048	6.6476	7.1802	5.873	1.4603	-1.1861	-1.0895	-1.6863	-1.603	0.4852	99.9695	2.003	0.03	2.3026	9.2103	4.6052
S102WTS014	Codilean et al. 2022	23363		3.5519	8.3081	0.11781	0.2388	0.4182	3.2329	4.8264	4.9004	21.0852	34.4726	53.188	3.5973	4.0532	4.197	0.0722	0.1392	0.2269	6.4402	3.9031	3.4075	-0.7115	0.004	0.636	0.214	-1.6378	0.1298	0.2242	1.3171	6.117	6.2139	2.6985	3.7266	5.36	3.5806	-1.5876	-0.8343	-0.5523	-1.2773	-1.0613	1.0911	5.1912	10.875	4.3332	4.6666	11.3316	5.9683
S025WTS042	Codilean et al. 2022	2112.89		5.955	8.5831	0.40651	0.6412	0.7757	4.6466	5.4616	5.6302	85.0959	124.799	169.787	4.9605	5.3799	5.5577	0.2664	0.4242	0.5246	6.6601	4.1296	3.6509	-0.6638	7.896	5.7599	0.5282	-1.9484	0.2437	0.2547	1.3513	6.5687	6.5581	2.6129	3.8777	5.1877	3.4969	-0.9592	-0.5989	-0.6061	-1.0741	-1.0744	1.164	2.3069	7.722	0.2118	4.8977	9.7937	4.721
S025WTS043	Codilean et al. 2022	2197.09		5.9159	8.5831	0.40651	0.6412	0.7757	4.6466	5.4616	5.6302	85.0959	124.799	169.787	4.9605	5.3799	5.5577	0.2664	0.4242	0.5246	6.6601	4.1296	3.6509	-0.6638	7.896	5.7599	0.5282	-1.9484	0.2437	0.2547	1.3513	6.5687	6.5581	2.6129	3.8777	5.1877	3.4969	-0.9592	-0.5989	-0.6061	-1.0741	-1.0744	1.164	2.3069	7.722	0.2118	4.8977	9.7937	4.721
S061WTS017	Codilean et al. 2022	3826.72		5.3611	8.5358	0.27737	0.4815	0.6237	3.5229	4.9273	5.0696	35.3501	58.5005	76.8398	3.5265	3.7782	4.4432	0.1273	0.2434	0.3285	7.0724	4.7942	4.4157	-0.6044	65.269	68.8174	1.3787	-2.6795	0.6453	0.2106	1.2823	6.742	6.8146	1.9948	3.0466	4.974	3.0203	0.353	-0.4288	-0.3404	-1.0951	-1.0117	1.0329	0	9.134	0	2.3026	9.2103	4.6052
S123WTS011	Codilean et al. 2022	11560.5		4.2555	8.6094	0.42348	0.6733	0.7998	4.7977	5.6919	5.8952	92.5449	148.28	215.306	5.7855	6.4555	6.7901	0.2716	0.478	0.6106	4.8116	4.049	3.5074	-0.5605	2.697	1.1108	0.3985	-1.8715	0.2258	0.248	1.3626	6.5428	6.3965	4.3733	5.4405	6.3066	4.7624	-1.0657	-0.0619	-0.0491	-0.6145	-0.6002	1.6581	73.1232	4.72	2.8458	4.8582	9.4079	4.6453
S123WTS010	Codilean et al. 2022	11925.9		4.2243	8.6094	0.42348	0.6733	0.7998	4.7977	5.6919	5.8952	92.5449	148.28	215.306	5.7855	6.4555	6.7901	0.2716	0.478	0.6106	4.8116	4.049	3.5074	-0.5605	2.697	1.1108	0.3985	-1.8715	0.2258	0.248	1.3626	6.5428	6.3965	4.3733	5.4405	6.3066	4.7624	-1.0657	-0.0619	-0.0491	-0.6145	-0.6002	1.6581	73.1232	4.72	2.8458	4.8582	9.4079	4.6453
S025WTS019	Codilean et al. 2022	5220.37		5.0505	8.5742	0.39663	0.6846	0.8385	4.4014	5.3881	5.605	81.0997	121.713	161.024	4.8903	5.3228	5.6849	0.2635	0.431	0.5333	8.0929	4.8777	4.3986	-0.0562	78.817	85.2338	1.5594	-2.5956	0.5994	0.2588	1.4016	7.2304	7.2972	3.3443	4.5108	5.5826	3.9839	1.0652	-0.7994	-0.8036	-1.2627	-1.2609	1.1716	5.429	5.901	0.0002	4.9814	9.4938	4.6264
S207WTS031	Codilean et al. 2022	421.656		7.5666	7.8717	0.47567	0.7712	0.9745	4.7928	5.5811	5.732	101.836	145.186	194.886	5.848	6.3078	6.5753	0.3793	0.5717	0.6921	6.2855	4.5776	3.6512	0.2394	18.687	33.8018	0.6636	-1.8741	0.205	0.2581	1.3579	6.902	6.9753	4.6812	5.5017	7.2085	5.4946	-0.0138	-0.7879	-0.7497	-1.3053	-1.2762	0.8727	50.693	5.609	3.2889	6.7472	12.8237	5.9717
S207WTS030	Codilean et al. 2022	1320.4		6.4251	7.8715	0.47579	0.7712	0.9746	4.7928	5.5811	5.7321	101.836	145.186	194.886	5.8484	6.3079	6.5756	0.3794	0.5717	0.6921	6.2855	4.5776	3.6512	0.2394	18.691	33.7878	0.6636	-1.8741	0.205	0.2581	1.3579	6.902	6.9753	4.6812	5.5017	7.2087	5.4949	-0.0138	-0.7879	-0.7497	-1.3053	-1.2762	0.8727	50.7052	5.608	3.2882	6.7474	12.824	5.9718
S116WTS008	Codilean et al. 2022	165294		1.5953	8.2453	0.26093	0.4913	0.6244	3.6137	4.9798	5.0845	37.9858	56.8914	74.6568	3.8659	4.1949	4.4432	0.1385	0.2243	0.2875	6.4651	4.4786	3.8147	-0.8387	64.424	4.0318	0.7058	-2.577	0.3897	0.1959	1.2406	6.5031	6.5597	2.9191	3.5279	5.5192	3.4834	-0.7105	-2.1689	-2.1733	-2.2926	-2.2966	0.4646	0	5.151	0.0791	2.3026	9.2103	4.6052
S127WTS040	Codilean et al. 2022	45576.1		2.8837	8.5057	0.24255	0.4526	0.5787	3.874	5.0576	5.184	42.3188	64.3696	85.3816	4.4949	5.0214	5.2786	0.1423	0.2388	0.3121	5.9451	4.5121	4.0786	-0.7711	19.943	2.435	0.5982	-2.2424	0.3315	0.234	1.3231	6.5857	6.5267	3.1066	4.1613	5.4797	3.7605	-0.839	-0.8151	-0.7666	-1.3988	-1.3444	1.0998	0	6.814	0	2.3026	9.2103	4.6052
S188WTS013	Codilean et al. 2022	17898.1		3.8184	8.539	0.3058	0.5455	0.6649	4.5958	5.4743	5.6573	69.2986	104.478	153.046	5.2288	5.6119	5.9158	0.204	0.3292	0.4214	5.0536	4.0271	3.4373	-1.0666	0.095	3.7468	0.3461	-1.3023	0.2044	0.2035	1.2455	6.1279	6.0977	2.7996	4.1857	5.2958	3.7542	-1.7635	0.1464	0.1787	-0.4576	-0.419	1.6605	50.7579	5.103	3.2284	2.3026	9.2103	4.6052
S008WTS005	Codilean et al. 2022	147360		1.7102	8.4535	0.04073	0.0436	0.206	2.9016	4.7353	4.8216	14.197	24.3667	52.6417	2.9467	3.2585	3.5252	0.0253	0.0246	0.1226	6.0428	4.1863	3.6732	-1.5491	0.345	1.1134	0.3271	-1.9547	0.2212	0.1409	1.0954	5.9359	6.0125	1.0688	2.2874	4.7801	2.7293	-2.1606	-1.8061	-1.6994	-2.0899	-2.0356	0.2705	89.4882	3.207	2.3582	2.3026	9.2103	4.6052
S148WTS007	Codilean et al. 2022	5231.77		5.0483	8.1358	0.38449	0.6613	0.8405	4.4557	5.361	5.4811	78.5944	117.082	158.173	4.9897	5.3175	5.6002	0.2861	0.466	0.583	4.6306	3.7242	3.0242	-0.6456	0	19.8458	0.098	-1.2396	0.0657	0.2117	1.4041	6.2223	5.7409	2.879	4.2227	5.5595	4.0993	-2.1102	-0.2646	-0.2509	-0.7912	-0.7737	1.9076	100	2.006	0	5.8061	10.9706	6.0921
S159WTS007	Codilean et al. 2022	181897		1.4996	8.5886	0.07979	0.1688	0.2628	3.384	4.9127	5.0637	19.5896	32.9628	51.6004	4.1633	4.7971	5.191	0.0474	0.0861	0.1395	7.1525	4.5429	4.247	-0.2133	12.272	55.7247	1.0887	-2.0204	0.5487	0.2407	1.2726	7.1449	7.2012	4.0846	4.8235	6.093	4.2333	0.7309	-1.8872	-1.7802	-2.0644	-1.9966	0.4205	100	2.39	0	2.3026	9.2103	4.6052
S256WTS001	Codilean et al. 2022	63170.5		2.5572	7.5365	0.16705	0.2973	0.5577	4.2008	5.2125	5.6257	46.9117	73.851	138.025	4.6101	5.1135	5.5225	0.1082	0.1752	0.3425	5.0116	3.7729	3.1473	-1.587	0	0.0122	0.191	-0.8711	0.1282	0.2161	1.2348	5.6186	5.6093	1.0357	2.188	4.9757	3.0768	-2.7777	0.4055	0.4526	-0.2273	-0.1628	1.7486	31.1686	7.295	3.9701	2.3026	9.2103	4.6052
S188WTS037	Codilean et al. 2022	39946.1		3.0155	7.5842	0.35222	0.6157	0.7493	4.6435	5.5542	5.7075	78.921	125.507	176.543	5.7336	6.3429	6.5369	0.2379	0.4069	0.5159	4.6681	4.1337	3.5089	-0.9619	1.329	5.1836	0.524	-1.5362	0.2143	0.2036	1.2921	5.996	6.2148	3.0256	4.5298	6.027	4.8386	-1.5575	0.0197	0.0286	-0.5473	-0.5377	1.7356	66.9188	5.103	0.9241	2.3026	9.2103	4.6052
S086WTS011	Codilean et al. 2022	346.89		7.7618	7.337	0.5633	0.7657	0.9698	4.8041	5.5846	5.8184	109.882	156.837	212.918	6.2761	6.6524	7.3757	0.3587	0.5654	0.7191	5.0212	4.5973	3.8263	-0.508	5.346	10.771	0.4056	-1.9248	0.0868	0.2642	1.4155	6.3505	7.1741	4.0202	5.2644	7.0685	5.7566	-0.7211	-0.179	-0.1987	-0.793	-0.7875	1.5026	99.3333	3.077	0.1019	6.4502	12.7753	6.0175
S143WTS003	Codilean et al. 2022	806.504		6.9181	6.8118	0.52013	0.8316	1.0367	4.6706	5.4886	5.5774	107.337	148.775	194.405	5.805	6.2554	6.3967	0.4094	0.6109	0.7274	7.0886	4.8187	3.8878	0.6502	39.318	48.3848	0.9455	-2.2229	0.3574	0.273	1.4135	7.3719	7.4087	3.8112	4.431	7.3226	5.4201	1.0684	-1.2269	-1.2123	-1.6708	-1.6628	0.5888	66.0048	4.623	3.1625	6.1624	9.3539	5.7757
S171WTS001	Codilean et al. 2022	92392.3		2.177	7.6065	0.11326	0.2612	0.3912	3.5892	4.9962	5.1396	27.5769	46.7016	69.0964	3.956	4.3247	4.8541	0.0698	0.1396	0.2044	7.1727	4.3462	4.0574	-0.989	0.009	13.6156	0.5676	-2.0448	0.2881	0.2283	1.231	6.4044	6.1469	1.9379	2.7813	5.3164	3.3946	-1.444	-1.5288	-1.4259	-1.9393	-1.8728	0.4783	100	2.682	0	2.3026	9.2103	4.6052
S135WTS020	Codilean et al. 2022	17800.3		3.8238	7.592	0.32701	0.5548	0.7027	4.2777	5.2966	5.3906	61.6722	95.7009	124.844	5.1311	5.7056	5.8986	0.2031	0.331	0.4204	7.3814	4.6986	4.3883	0.1991	65.493	64.7214	1.2504	-2.5983	0.5894	0.2525	1.2666	7.4135	7.6461	4.0635	4.65	6.889	4.9428	1.5329	-0.4761	-0.4388	-0.8433	-0.8146	1.3523	34.7488	5.536	1.9863	2.3026	9.2103	4.6052
S127WTS046	Codilean et al. 2022	3472.09		5.4583	7.4646	0.20691	0.4272	0.5766	3.3761	4.8799	4.9559	29.3839	50.7157	69.9488	3.232	3.3506	3.9398	0.1065	0.2014	0.3076	7.0408	4.7863	4.4003	-0.6388	51.979	78.1018	1.4216	-2.5295	0.6652	0.2037	1.3867	6.7231	6.8553	0.7056	1.7729	4.9013	2.9046	0.4136	0.0899	0.162	-0.6925	-0.6201	1.0368	0	9.482	0	2.3026	9.2103	4.6052
S026WTS014	Codilean et al. 2022	43322.7		2.9344	7.0137	0.05494	0.0991	0.1561	2.5925	4.6616	4.6818	8.4978	15.3855	20.4962	3.0485	3.2674	3.5563	0.0257	0.0474	0.0801	7.5313	4.8053	4.1076	-0.0025	63.242	28.0976	0.7654	-2.9318	0.5333	0.286	1.455	7.0807	7.1671	3.0399	4.0728	6.4678	4.9096	0.8222	-1.642	-1.521	-2.0875	-2.0303	0.3226	7.9936	9.475	4.0759	4.2076	9.2103	5.121
S137WTS012	Codilean et al. 2022	11701.6		4.2433	6.9147	0.19563	0.3736	0.5153	3.3891	4.9103	4.9836	31.8356	52.5728	69.7584	3.9232	4.3081	4.4988	0.1178	0.2095	0.298	6.6004	4.5739	3.8814	-0.4127	39.234	68.461	1.0967	-2.2653	0.5436	0.2575	1.3661	6.7075	6.6855	2.9594	3.5238	6.4762	4.4929	0.1233	-1.0954	-1.0081	-1.6205	-1.5507	0.7986	17.9306	9.211	4.1975	4.7049	9.2103	4.6124
S182WTS036	Codilean et al. 2022	7979.05		4.6262	7.381	0.33781	0.5178	0.6206	3.8965	5.053	5.1265	49.1292	69.8918	86.7486	4.6512	4.9807	5.1679	0.1782	0.2759	0.3312	7.4379	4.7387	4.2747	-0.0959	55.662	96.0551	1.2931	-2.5047	0.6172	0.3076	1.4903	7.1163	7.1654	3.2132	4.2206	6.3277	4.7315	0.9683	-0.9475	-0.409	-1.3292	-1.0818	1.1223	0	6.037	0	2.3026	9.2103	4.6052
S207WTS027	Codilean et al. 2022	471.237		7.4555	6.7733	0.46867	0.7639	0.9529	4.6686	5.4753	5.6977	96.3912	136.092	179.073	5.7957	6.2902	6.5332	0.3623	0.5442	0.6459	6.475	4.634	3.6945	0.3885	16.544	31.1319	0.8539	-1.8669	0.209	0.2647	1.3673	7.0037	7.2042	3.8791	4.5848	7.4187	5.6009	0.3066	-0.8855	-0.841	-1.3992	-1.3614	0.7812	55.9261	4.862	3.0818	6.9824	13.3855	5.9899
S121WTS012	Codilean et al. 2022	11367		4.2724	6.7489	0.24904	0.4112	0.5121	3.9057	5.0868	5.1466	45.3038	67.1721	86.8272	4.5644	4.9598	5.1965	0.1657	0.2652	0.3236	6.8343	4.4002	3.6084	0.4549	76.732	71.3682	1.2247	-2.8717	0.5681	0.2768	1.3645	7.173	6.9426	2.578	3.3172	6.2837	4.4424	1.0691	-1.0433	-0.9605	-1.5155	-1.4431	0.6814	77.7837	3.429	2.0344	4.5902	9.2103	5.4918
S143WTS011	Codilean et al. 2022	4359.39		5.2307	6.7877	0.45213	0.744	0.8978	4.1975	5.2147	5.3499	78.4376	116.459	147.298	5.1163	5.6152	5.8768	0.3101	0.4947	0.5991	7.2735	4.8774	4.0461	0.0811	37.037	75.3851	0.892	-2.3167	0.4508	0.2787	1.4049	6.9497	7.0451	3.4875	4.097	7.0436	5.1239	0.5662	-1.2103	-1.1612	-1.6597	-1.6281	0.746	94.0262	3.084	1.9136	5.5279	9.795	5.4813
S230WTS019	Codilean et al. 2022	547.891		7.3047	7.0081	0.47206	0.7792	0.9351	4.6575	5.4599	5.5744	95.8708	140.535	179.14	5.6021	5.9653	6.164	0.3515	0.5681	0.6632	4.7466	3.9678	3.2235	-0.2274	0.061	4.4058	0.3397	-1.2221	0.1023	0.1982	1.2348	6.643	6.5732	3.0247	4.2869	6.4593	5.1142	-0.9822	0.1039	0.103	-0.4095	-0.4221	2.0997	26.3208	5.118	1.2677	6.1344	12.741	6.0119
S071WTS009	Codilean et al. 2022	8636.99		4.547	7.2043	0.48045	0.6802	0.7924	4.3025	5.2481	5.3114	79.4446	106.75	137.513	5.0296	5.2776	5.5873	0.2811	0.4122	0.4927	5.9176	4.0392	3.4257	-0.2991	19.813	20.2221	0.5384	-1.9555	0.2972	0.2665	1.5028	6.5654	6.7304	3.0054	3.8742	6.293	4.5678	-0.3939	-0.5708	-0.1785	-1.0654	-0.9036	0.8317	9.7424	8	3.8197	4.3692	9.2103	5.8096
S023WTS029	Codilean et al. 2022	12806.9		4.1531	7.1142	0.05474	0.1323	0.2474	3.2203	4.8349	4.9821	16.0106	28.0105	43.7532	3.0098	3.1971	3.5664	0.0438	0.0779	0.1478	5.7717	3.9756	3.4347	-1.3037	8.984	8.2513	0.4493	-2.3036	0.1788	0.1636	1.1135	5.9964	5.7993	-0.5482	0.9761	4.7317	2.7184	-2.2669	-1.5385	-1.3665	-1.9754	-1.8702	0.5257	14.9473	6.012	2.1988	3.3827	9.2103	5.2284
S082WTS006	Codilean et al. 2022	26518.1		3.4252	7.3565	0.24722	0.4468	0.5548	4.0561	5.1876	5.2986	47.1928	75.063	97.4141	4.4843	4.8772	5.3385	0.1649	0.2827	0.3619	6.5463	4.1639	3.5796	-1.663	0	1.4194	0.1053	-1.3425	0.1139	0.2511	1.3606	5.6034	6.3988	2.0838	3.1261	5.5293	3.8161	-2.1959	-0.78	-0.7375	-1.2602	-1.2204	1.0271	66.7273	4.799	3.2708	4.0359	9.2103	4.7726
S038WTS018	Codilean et al. 2022	93025.1		2.1702	8.2151	0.0576	0.0984	0.2958	2.937	4.7363	4.8077	13.6321	24.0606	41.4753	2.941	3.1321	3.5418	0.0343	0.064	0.1561	5.9154	4.2146	3.7434	-1.4584	0.793	6.2347	0.3908	-1.982	0.2412	0.1436	1.1289	6.0476	6.1054	0.851	2.0764	4.7824	2.7369	-1.9596	-1.8301	-1.7458	-2.0939	-2.0495	0.2705	78.7931	4.211	2.4201	2.3026	9.2103	4.6052
S116WTS003	Codilean et al. 2022	200221		1.4036	7.992	0.05602	0.1037	0.2931	2.9851	4.7469	4.7849	15.1263	23.6987	47.0422	2.7987	3.0004	3.075	0.035	0.0519	0.1494	6.3827	4.1889	3.5827	-1.3464	5.636	0.0094	0.2576	-2.0003	0.1545	0.1691	1.1242	6.0375	5.7472	0.601	0.9594	4.7768	2.5018	-2.4075	-2.0739	-2.0402	-2.2284	-2.2164	0.5231	0	5.427	0	2.3026	9.2103	4.6052
S226WTS006	Codilean et al. 2022	24537.8		3.5029	7.3522	0.2474	0.4469	0.5549	4.0552	5.1869	5.2987	47.2022	75.062	97.4304	4.4798	4.8599	5.3393	0.165	0.2827	0.3619	6.5463	4.1639	3.5796	-1.6634	0	1.4116	0.1053	-1.3463	0.114	0.2511	1.3606	5.6029	6.3988	2.0838	3.1261	5.5318	3.8192	-2.1959	-0.78	-0.7375	-1.2602	-1.2204	1.0271	66.7471	4.803	3.2724	4.0271	9.2103	4.7718
S074WTS001	Codilean et al. 2022	1548.44		6.2658	8.5856	0.3222	0.586	0.7434	4.3371	5.3387	5.4756	68.9878	106.362	144.097	5.2827	5.8159	6.1365	0.1934	0.3478	0.4462	7.9427	4.8988	4.2601	0.7174	72.302	81.1947	1.2895	-2.5408	0.5378	0.2624	1.2917	7.6575	7.5699	5.4123	5.6344	7.242	4.963	1.7282	0.0612	0.0184	-0.5128	-0.5439	1.3905	34.6972	5.418	2.0787	6.9849	10.0063	4.6183
S256WTS005	Codilean et al. 2022	54912.4		2.6973	8.4776	0.19232	0.4155	0.583	4.0776	5.2661	5.4426	46.2753	79.5741	117.966	4.0246	4.5422	5.0218	0.1213	0.2397	0.3425	5.5213	3.7023	3.0234	-1.8669	0.065	0.3158	0.1519	-0.7759	0.0972	0.1663	1.2448	5.2266	5.3501	-0.2009	0.9582	4.6558	2.4312	-3.2942	0.2953	0.3282	-0.2748	-0.2294	1.3525	27.4702	8.916	4.0413	4.2875	9.2103	4.6217
S023WTS022	Codilean et al. 2022	7910.88		4.6348	8.1502	0.09511	0.1	0.2033	3.1103	4.7734	4.9053	13.2779	21.0986	36.409	2.9758	3.1961	3.5768	0.036	0.0529	0.1153	5.7987	3.9211	3.3389	-1.3496	5.296	4.8414	0.3509	-2.2614	0.1659	0.1667	1.1032	5.9438	5.8667	0.9984	2.2838	4.8198	2.8408	-2.2777	-1.5602	-1.3732	-1.974	-1.8592	0.5069	8.4372	5.67	1.3834	3.4397	9.2103	5.2361
S086WTS002	Codilean et al. 2022	265.864		8.0278	8.3075	0.54704	0.7356	0.9241	4.8828	5.6592	5.8617	110.441	159.291	222.631	6.4316	6.8335	7.3956	0.3508	0.5581	0.6971	6.1299	5.0314	4.282	-0.1435	24.824	34.6348	0.746	-2.2405	0.2912	0.2547	1.3799	6.9482	7.5876	5.3325	6.54	7.4218	6.0912	0.4442	-0.093	-0.1201	-0.706	-0.7103	1.5779	97.7568	3.24	0.0536	6.4619	12.4286	5.6748
S086WTS024	Codilean et al. 2022	330.81		7.8093	8.3047	0.54744	0.7357	0.9242	4.8845	5.6593	5.8621	110.54	159.349	222.772	6.4324	6.834	7.3965	0.351	0.5583	0.6974	6.1299	5.0314	4.282	-0.1455	24.847	34.5412	0.746	-2.2415	0.2904	0.2547	1.3799	6.9449	7.5876	5.3279	6.536	7.4201	6.09	0.4406	-0.093	-0.1201	-0.706	-0.7103	1.5779	97.7625	3.238	0.0538	6.4619	12.4312	5.6766
S046WTS065	Codilean et al. 2022	159472		1.6312	8.0741	0.1186	0.2706	0.3967	3.0718	4.7994	4.8425	19.602	36.8486	47.7767	3.5674	4.0245	4.2162	0.0617	0.141	0.2065	7.2711	4.7529	4.1482	-0.0707	76.206	51.0618	1.1595	-3.1845	0.5861	0.2795	1.428	7.0278	7.0335	3.6796	4.6783	6.169	4.5457	0.7933	-1.7922	-1.7597	-2.0923	-2.0762	0.2909	13.4753	8.731	3.9953	4.3127	9.2103	4.8371
S009WTS002	Codilean et al. 2022	35914.5		3.1219	7.7256	0.09019	0.235	0.3026	3.1711	4.827	4.8962	21.8843	36.3661	46.9196	3.5993	3.9631	4.247	0.0885	0.1557	0.2103	6.647	4.341	3.4987	0.3082	62.45	59.1837	1.2318	-2.7662	0.5888	0.2761	1.4176	6.9597	6.9464	3.2975	4.225	6.1326	4.4415	1.0145	-1.8938	-1.8872	-2.1087	-2.1078	0.3851	94.7837	2.511	1.8062	5.0953	9.2103	5.4682
S009WTS068	Codilean et al. 2022	28653.3		3.3478	7.8103	0.04472	0.1475	0.2465	3.1563	4.8169	4.8866	15.8461	24.5986	37.0744	3.6708	4.0424	4.4941	0.0458	0.0751	0.1157	6.3682	4.3292	3.5958	-0.1135	24.37	33.5558	1.1697	-2.2887	0.63	0.2745	1.3673	6.7758	6.879	3.2297	3.6419	6.0178	3.8824	0.7426	-1.1526	-1.1157	-1.6761	-1.6466	0.4698	83.8173	3.258	1.8354	4.8063	9.2103	4.6212
S143WTS001	Codilean et al. 2022	887.913		6.8219	7.7903	0.48669	0.7657	0.9193	4.7366	5.5343	5.6596	101.027	142.816	185.352	5.7491	6.28	6.5067	0.3835	0.5686	0.6634	7.0881	4.5194	3.7775	0.0616	35.464	50.6951	0.9791	-2.1111	0.3249	0.2624	1.3875	6.7491	7.1146	4.5164	5.5572	7.1286	5.6233	0.2827	-1.0504	-1.0203	-1.5399	-1.5164	0.752	75.0216	4.922	3.1486	5.7469	10.4599	5.7606
S076WTS006	Codilean et al. 2022	346.71		7.7623	8.2853	0.5266	0.754	0.9436	4.8126	5.626	5.8691	103.933	155.608	211.274	6.2115	6.6382	7.2362	0.3369	0.5657	0.6958	5.4282	4.6715	3.9319	-0.607	13.978	20.5068	0.6305	-1.9519	0.1666	0.2691	1.4342	6.3489	7.2965	5.1407	6.3541	7.2627	5.931	-0.4836	-0.393	-0.3253	-0.9558	-0.8918	1.4898	48.4224	5.227	2.6947	5.9232	11.6865	5.904
S158WTS001	Codilean et al. 2022	28493		3.3534	8.4428	0.24435	0.4478	0.6172	3.2701	4.8863	5.0494	31.2288	52.1907	77.8871	4.5987	5.1259	5.6317	0.1085	0.1924	0.2696	8.4982	5.601	4.7558	0.5077	57.305	77.3842	1.5554	-2.5498	0.6989	0.3036	1.6592	7.839	7.7808	4.8798	6.3196	6.8833	5.748	2.1692	-1.6456	-1.6271	-1.9834	-1.9704	0.3725	25.3857	9.388	4.3021	2.3026	9.2103	4.6052
S082WTS031	Codilean et al. 2022	19374.7		3.7391	8.3728	0.24887	0.4555	0.5898	4.0901	5.1949	5.3171	48.6902	78.0975	104.198	4.3891	4.9009	5.233	0.1615	0.2849	0.3901	6.3451	4.1244	3.6232	-1.4981	0	0.5054	0.1826	-1.5082	0.1448	0.2345	1.2748	5.7931	6.7724	2.3603	3.5749	5.1673	3.4304	-1.6692	-0.8554	-0.811	-1.3409	-1.2954	1.0637	15.1147	7.34	3.4721	2.9872	9.2103	4.6405
S094WTS013	Codilean et al. 2022	12208.2		4.201	8.2043	0.36562	0.5878	0.6945	4.5297	5.4126	5.5734	73.0684	107.606	146.161	4.9422	5.3905	5.6894	0.2561	0.4103	0.5085	7.5725	4.4813	3.6754	-1.3199	0.017	1.0165	0.3417	-1.4533	0.1866	0.1896	1.2133	5.8174	5.8143	2.8875	3.7602	5.5242	3.6796	-2.2461	0.2843	0.2882	-0.3259	-0.3166	1.5885	70.2904	5.461	2.875	6.1814	9.2103	5.4199
S102WTS009	Codilean et al. 2022	39009.1		3.0393	8.0885	0.25027	0.4999	0.6214	3.8396	5.046	5.1485	41.7218	65.9771	83.8977	3.4318	3.7001	4.044	0.167	0.3016	0.3864	5.9455	3.7751	3.2374	-1.1434	0	7.9641	0	-0.9755	0.0954	0.2092	1.2434	5.7413	5.5881	-0.1427	0.8565	4.6827	2.469	-2.5433	-0.6474	-0.2226	-1.2083	-0.8911	0.524	15.0652	7.78	3.2578	4.4001	9.2103	5.9666
S086WTS004	Codilean et al. 2022	254.226		8.0726	8.2533	0.55855	0.7412	0.9299	4.9138	5.666	5.8694	113.191	161.174	226.345	6.4758	6.8853	7.4262	0.359	0.5639	0.702	6.058	4.9928	4.2549	-0.1891	25.376	32.8943	0.746	-2.2462	0.2762	0.2539	1.3775	6.8736	7.5756	5.2598	6.4733	7.4031	6.0777	0.36	-0.1061	-0.134	-0.7199	-0.7238	1.5735	99.4314	3.145	0.0565	6.4619	12.4794	5.71
S076WTS015	Codilean et al. 2022	366.565		7.7066	8.2379	0.61928	0.7904	0.977	4.9106	5.6718	5.9565	120.853	166.611	238.319	6.5654	6.993	7.5272	0.3863	0.5969	0.7362	5.5217	4.7462	4.0333	-0.4758	17.973	24.2793	0.6314	-2.2643	0.2108	0.2625	1.4143	6.5083	7.399	5.281	6.4813	7.4372	6.1002	-0.1805	-0.267	-0.2521	-0.862	-0.8331	1.5207	64.645	5.8	2.5482	6.3559	12.3282	5.8661
S067WTS002	Codilean et al. 2022	708609		0.1398	8.3174	0.0758	0.1374	0.2424	3.3854	4.8582	4.9463	18.9837	28.7642	40.4988	2.845	3.0574	3.241	0.0575	0.0959	0.1431	4.8713	3.7553	3.1713	-2.2405	0	0.3448	0	-0.6553	0.0833	0.1816	1.1341	4.7426	4.8841	-4.4228	-2.7489	4.6053	2.3059	-4.0149	0.035	0.1511	-0.5062	-0.3797	1.3096	24.7743	9.124	3.5148	2.8173	9.2103	4.6053
S206WTS005	Codilean et al. 2022	3029.59		5.5946	8.1494	0.4191	0.6631	0.7742	4.4943	5.3886	5.485	80.2639	116.969	152.05	4.7786	5.1501	5.3792	0.2778	0.4448	0.5386	5.9966	4.4833	3.6471	-1.0219	0	1.1044	0.0791	-0.826	0.0868	0.1976	1.2472	5.9978	5.5388	2.4626	3.9397	5.3176	3.8588	-2.5153	-0.0644	-0.0585	-0.64	-0.6324	1.4799	55.2186	5.583	0.5924	6.5353	10.8221	5.9843
S188WTS014	Codilean et al. 2022	28552.9		3.3513	8.4171	0.249	0.5167	0.6444	4.3052	5.3767	5.5661	59.1307	95.0577	140.208	4.8334	5.4486	5.8186	0.1624	0.2969	0.3826	4.892	3.8406	3.2327	-1.32	0	0.7783	0.2923	-1.2245	0.1791	0.2049	1.2472	5.8254	5.8032	1.6128	3.2672	4.8991	3.2069	-2.2752	0.2686	0.3109	-0.4003	-0.3447	1.7516	49.4393	6.138	3.3727	2.3026	9.2103	4.6052
S009WTS067	Codilean et al. 2022	50867.7		2.7738	7.7043	0.04184	0.1751	0.2566	2.9285	4.7423	4.7986	13.7606	22.3741	32.5437	3.1257	3.3857	3.6669	0.0485	0.0874	0.1292	6.5269	4.3124	3.5676	0.0036	22.026	37.1662	1.2043	-2.273	0.6476	0.2748	1.4418	6.8513	6.904	3.5507	3.9974	6.3529	4.2611	0.8992	-1.5141	-1.4758	-1.9235	-1.8985	0.4767	51.9556	5.722	3.0106	2.3026	9.2103	4.6052
S235WTS009	Codilean et al. 2022	24912.9		3.4877	8.1998	0.14401	0.3408	0.5316	3.6015	4.9932	5.1632	31.7278	56.4212	83.6912	3.4323	3.8975	4.0429	0.1002	0.2031	0.3139	5.9244	4.2335	3.4811	-1.5577	0	1.0385	0.1836	-1.07	0.1541	0.1651	1.1852	5.8801	6.0947	1.3056	2.7468	4.8756	3.0349	-2.2716	-0.2025	-0.094	-0.7306	-0.6186	1.4128	0	10.718	4.2635	4.4726	9.2103	4.6227
S140WTS006	Codilean et al. 2022	130.669		8.7382	8.2124	0.43036	0.7491	0.9399	4.9133	5.7152	5.9492	103.245	152.533	219.017	6.1208	6.6002	7.2124	0.3314	0.5445	0.6739	5.756	4.7234	4.0497	-0.4644	23.881	29.4661	0.6949	-2.5047	0.2194	0.2675	1.4267	6.5022	7.5232	4.3297	5.5342	6.5967	5.2114	-0.0428	-0.3257	-0.181	-0.8326	-0.7315	1.2322	93.5009	3.74	1.0623	6.6589	12.2224	5.8683
S102WTS011	Codilean et al. 2022	85329.8		2.2565	8.0389	0.06619	0.1326	0.1975	2.9724	4.7469	4.7836	12.5838	19.1667	25.0813	3.0636	3.3565	3.5412	0.0385	0.07	0.1003	6.2998	3.8057	3.2495	-0.9728	0	0	0.1745	-1.7632	0.1312	0.2073	1.231	5.8952	6.0499	2.4963	3.1928	5.3919	3.392	-1.9238	-0.9522	-0.2041	-1.3622	-0.854	0.5096	0.1006	8.238	2.0591	3.8821	9.2103	5.9315
S207WTS029	Codilean et al. 2022	958.131		6.7458	7.6942	0.47891	0.7762	0.9808	4.7827	5.5875	5.7434	102.132	145.674	195.566	5.8588	6.3455	6.591	0.3812	0.5734	0.6932	6.3055	4.6132	3.6826	0.2351	17.589	33.4443	0.7375	-1.8611	0.1945	0.258	1.363	6.8847	6.9982	4.5514	5.3446	7.2461	5.5074	-0.0248	-0.803	-0.7696	-1.319	-1.2932	0.8571	55.7957	4.961	3.0784	6.817	12.9546	5.9824
S094WTS001	Codilean et al. 2022	49208.9		2.807	8.2126	0.25772	0.4421	0.5605	4.2388	5.2302	5.3589	51.6647	75.9035	106.392	3.7933	4.2532	4.5173	0.1629	0.2589	0.3363	5.9038	3.8652	3.2582	-2.1587	0	0.0525	0	-1.2076	0.0735	0.1836	1.1536	4.8796	4.8535	-0.3842	0.9806	4.6596	2.4696	-4.0043	0.268	0.3099	-0.2681	-0.2277	1.3886	53.2375	6.962	3.11	4.1772	9.2103	5.1497
S188WTS012	Codilean et al. 2022	12328.3		4.1912	8.377	0.25301	0.5326	0.6975	4.5341	5.5087	5.7141	65.6389	117.743	172.157	5.2138	5.718	6.2243	0.1746	0.3461	0.4983	5.3302	3.9985	3.3902	-0.9093	0	1.1898	0.381	-1.268	0.1801	0.2238	1.2812	6.3162	6.1967	2.7035	4.1095	5.3275	3.8179	-1.6221	0.244	0.2881	-0.3623	-0.3064	1.6726	71.7633	4.558	2.9747	2.3026	9.2103	4.6052
S104WTS024	Codilean et al. 2022	594.635		7.2229	8.1259	0.5237	0.7521	0.917	4.7374	5.4839	5.6191	102.835	141.173	181.511	5.6189	6.0074	6.3181	0.3549	0.5181	0.6256	6.9017	4.8031	4.1597	0.0283	40.333	47.6311	0.9088	-2.5023	0.4145	0.2159	1.3012	7.1637	7.2362	4.1129	5.0983	6.4831	4.8822	0.5952	-0.1938	-0.2598	-0.8099	-0.8557	1.6148	68.0708	4.041	0.5462	5.8039	11.0336	5.5088
S059WTS012	Codilean et al. 2022	15653.1		3.9524	8.4249	0.12654	0.5089	0.6619	4.057	5.2994	5.4319	60.4441	97.4811	128.857	4.6767	5.4141	5.7626	0.1755	0.3344	0.4346	6.5636	4.4823	4.3367	-0.9955	9.704	41.6342	1.0498	-2.2082	0.4464	0.2108	1.3452	6.2234	6.314	3.2854	4.6277	5.638	4.2031	-0.8929	-0.0257	0.0207	-0.5838	-0.531	1.58	45.9011	6.591	3.6071	2.3026	9.2103	4.6052
S188WTS011	Codilean et al. 2022	38749.4		3.0459	8.3473	0.27514	0.5658	0.711	4.5793	5.509	5.6733	68.9132	119.812	170.478	5.0565	5.485	5.8252	0.1924	0.3725	0.5067	5.5229	3.9355	3.2686	-1.1475	0.004	2.2794	0.3796	-1.192	0.1738	0.2116	1.242	6.0972	6.0883	2.3137	3.4614	5.158	3.3714	-1.913	0.3309	0.3674	-0.292	-0.2496	1.7219	63.8901	4.59	2.9684	3.393	9.2103	4.6072
S256WTS010	Codilean et al. 2022	39712.5		3.0214	8.3469	0.28907	0.566	0.7111	4.5781	5.5089	5.6732	68.9342	119.873	170.592	5.0525	5.4813	5.8251	0.1921	0.3726	0.5068	5.5097	3.9275	3.2607	-1.1489	0.004	2.282	0.3796	-1.196	0.1737	0.2116	1.242	6.0958	6.0962	2.3137	3.4614	5.1582	3.3716	-1.9076	0.3309	0.3674	-0.292	-0.2496	1.7219	63.8583	4.584	2.9485	3.4308	9.2103	4.6071
S086WTS027	Codilean et al. 2022	195.917		8.3331	8.1461	0.57883	0.755	0.9457	4.9432	5.6822	5.8806	116.849	164.963	231.422	6.5401	6.9085	7.5844	0.3701	0.5767	0.7157	5.8671	4.9367	4.2059	-0.2474	23.784	30.5301	0.746	-2.2377	0.2456	0.2557	1.3863	6.7756	7.5296	5.1167	6.337	7.3668	6.0464	0.1964	-0.1191	-0.1505	-0.7327	-0.7394	1.563	99.6776	3.053	0.0625	6.4784	12.5799	5.7738
S188WTS003	Codilean et al. 2022	54399.2		2.7067	8.3124	0.18979	0.4016	0.5689	4.1679	5.2385	5.451	46.536	78.7241	120.867	4.2206	4.6931	5.0542	0.1212	0.2188	0.3368	5.1915	3.6852	3.0282	-1.9314	0.009	0.0774	0.1257	-0.7054	0.0957	0.165	1.168	5.1556	5.3051	0.2231	1.4866	4.6948	2.5447	-3.3859	0.3147	0.3535	-0.2535	-0.2136	1.4117	29.4885	8.721	3.7741	4.4374	9.2103	4.6275
S188WTS039	Codilean et al. 2022	3047.84		5.5886	8.3673	0.43029	0.7152	0.8509	4.8587	5.6346	5.797	103.158	158.098	214.708	5.9501	6.4089	6.7682	0.3107	0.5136	0.6329	4.6667	4.1025	3.5753	-0.4296	5.709	2.6038	0.5055	-1.9625	0.2529	0.2442	1.3194	6.4785	6.3363	4.1228	5.0885	6.2957	4.6579	-0.9469	-0.1739	-0.1645	-0.7077	-0.6933	1.6718	40.2022	6.763	1.9418	5.676	10.091	4.6438
S086WTS007	Codilean et al. 2022	151.166		8.5924	8.1385	0.58086	0.7563	0.947	4.9464	5.6835	5.8819	117.213	165.272	231.68	6.546	6.9098	7.5853	0.3715	0.578	0.7163	5.8326	4.9367	4.2059	-0.2552	23.809	30.2711	0.746	-2.2387	0.2434	0.2557	1.3863	6.7624	7.5296	5.1059	6.3259	7.3635	6.0428	0.1847	-0.1191	-0.1505	-0.7327	-0.7394	1.563	99.6752	3.046	0.063	6.4784	12.587	5.7787
S156WTS003	Codilean et al. 2022	253075		1.1694	7.9612	0.03578	0.0647	0.0885	2.5803	4.6529	4.6838	4.3116	5.9941	8.6327	2.9817	3.3237	3.6492	0.0151	0.0232	0.0303	7.4982	4.8574	4.2633	-0.0863	88.874	72.483	1.147	-3.5268	0.5849	0.2504	1.4292	7.1252	7.1569	3.5883	4.3324	6.1833	4.3371	0.8841	-1.9505	-1.8585	-2.1405	-2.0931	0.2652	75.7342	3.812	0.424	2.3026	9.2103	4.6052
S188WTS022	Codilean et al. 2022	5962.1		4.9176	8.3501	0.40228	0.6723	0.7968	4.7664	5.5955	5.7183	91.3781	140.751	194.74	5.662	6.2312	6.4396	0.2768	0.4578	0.5682	4.6187	4.1087	3.48	-0.5197	2.117	1.7117	0.4383	-1.7976	0.231	0.2314	1.3127	6.4106	6.1681	3.8049	4.6774	6.0573	4.3084	-1.2169	-0.1317	-0.1231	-0.6773	-0.6683	1.7328	53.6589	6.332	3.3192	4.718	9.4082	4.6175
S081WTS002	Codilean et al. 2022	108798		2.0136	8.3753	0.08485	0.1344	0.1881	2.8104	4.6976	4.7681	10.7366	14.0545	38.0466	2.9698	3.214	3.6243	0.0306	0.0419	0.0694	6.8427	4.5752	4.2118	-0.2516	10.285	17.4363	1.3672	-2.1524	0.6112	0.2504	1.2845	7.0241	7.0923	3.07	3.3526	5.5337	3.284	0.7712	-0.6013	-0.4353	-1.1571	-0.953	0.8209	100	2	0	2.3026	9.2103	4.6052
S071WTS028	Codilean et al. 2022	41640.3		2.974	8.0691	0.26522	0.4765	0.6169	3.7005	4.9934	5.0967	40.6872	62.3857	82.6372	4.2624	4.7315	4.9264	0.1601	0.2611	0.3424	5.4242	4.1089	3.4203	-0.2838	0.762	6.2682	0.3026	-1.6729	0.194	0.2774	1.4567	6.5593	6.5623	3.5674	4.6717	6.0851	4.5442	-0.7955	-0.88	-0.3242	-1.3053	-0.994	0.8949	32.2828	6.472	2.8811	4.6382	9.2353	5.8956
S133WTS015	Codilean et al. 2022	51805.5		2.7556	8.0849	0.18448	0.3282	0.4724	3.345	4.884	4.9508	27.4559	43.481	55.8795	3.9644	4.3986	4.8742	0.0968	0.1684	0.2193	7.7164	4.8765	4.2523	0.4067	86.853	78.6257	1.6015	-2.7046	0.6924	0.3277	1.5985	7.4153	7.4166	4.6295	4.8267	6.9721	4.6699	1.7629	-2.2201	-2.2201	-2.3026	-2.3026	0.038	2.2731	7.024	1.5969	2.3026	9.2103	4.6052
S137WTS011	Codilean et al. 2022	11100.7		4.2961	7.6382	0.17474	0.3765	0.5267	3.3473	4.8888	5.0182	29.3408	52.047	76.6281	4.0833	4.5114	4.8942	0.1021	0.2001	0.2972	7.1624	4.7569	4.0634	-0.3712	29.211	60.5638	0.9529	-2.1804	0.5595	0.2606	1.4205	6.7502	7.1244	3.9815	4.673	6.7767	4.9234	0.5728	-1.6064	-1.6	-1.9849	-1.982	0.5095	11.5666	9.237	4.0508	4.8398	9.2103	4.6076
S076WTS005	Codilean et al. 2022	547.6		7.3053	8.0353	0.50167	0.7291	0.9152	4.7423	5.5856	5.7862	97.5836	147.627	203.599	6.1295	6.5278	7.1856	0.3162	0.5373	0.6746	5.171	4.5769	3.8088	-0.6653	12.635	18.7171	0.5337	-1.8239	0.1587	0.2698	1.4363	6.2962	7.2123	4.8753	6.0919	7.2418	5.9123	-0.6209	-0.4679	-0.3956	-1.0214	-0.9527	1.4206	41.6211	5.121	2.5535	5.7233	11.4344	5.9191
S235WTS012	Codilean et al. 2022	7559.37		4.6803	8.0372	0.11849	0.287	0.4348	3.2255	4.8275	4.9209	23.0975	40.3273	60.0431	3.1897	3.5497	3.775	0.077	0.1568	0.2351	6.7015	4.7181	4.0738	-1.5811	0	0.0967	0.1627	-0.7457	0.118	0.1736	1.2458	5.9038	6.0483	1.7436	3.102	5.0524	3.3337	-2.4233	-0.4892	-0.3591	-0.9864	-0.8416	1.5702	0	11.297	4.425	2.3026	9.2103	4.6052
S071WTS041	Codilean et al. 2022	4336.88		5.2359	7.9938	0.4239	0.6765	0.7694	4.5981	5.4901	5.6296	82.7648	125.275	169.595	5.4975	6.0298	6.3242	0.2775	0.4521	0.545	5.3423	4.2382	3.4277	-0.1552	6.692	9.4787	0.2195	-1.6831	0.1142	0.2783	1.449	6.6026	6.5611	4.0992	5.0282	6.5808	4.9358	-0.9065	-0.9334	-0.0556	-1.3791	-0.8618	1.0151	48.7125	5.489	1.684	5.6984	11.601	5.9936
S164WTS047	Codilean et al. 2022	86415.7		2.2439	8.2114	0.07433	0.155	0.3072	3.0592	4.7484	4.9543	18.8461	37.4066	61.6491	4.3582	4.6736	5.6567	0.0411	0.0675	0.1806	7.7379	5.1338	4.5246	0.2456	18.739	62.2858	1.4863	-2.1312	0.5543	0.247	1.2965	7.7227	7.6205	4.9642	6.5164	7.1658	6.1597	1.4549	-1.5559	-1.485	-1.9058	-1.8496	0.0784	96.4152	3.93	1.5227	2.3026	9.2103	4.6052
S178WST001	Codilean et al. 2022	15969		3.9324	8.0092	0.43572	0.6583	0.7325	4.7667	5.5373	5.6292	93.3167	135.924	177.398	4.4643	4.867	5.1268	0.3107	0.488	0.5689	6.0709	4.2345	3.5544	-1.7662	0	2.8202	0.0863	-0.8486	0.0934	0.1848	1.278	5.3294	5.1135	0.3839	1.782	4.7432	2.7045	-3.4302	0.2008	0.1776	-0.3496	-0.3724	1.3727	78.4588	4.496	2.6215	5.7593	9.7617	5.8323
S094WTS005	Codilean et al. 2022	15777.3		3.9445	7.9895	0.43335	0.6576	0.7319	4.7635	5.5348	5.631	92.9774	135.544	176.946	4.4623	4.8679	5.1273	0.3096	0.4871	0.5687	6.0709	4.2345	3.5544	-1.761	0	2.8785	0.0855	-0.8482	0.0929	0.1852	1.2773	5.3353	5.1153	0.3633	1.7599	4.743	2.7034	-3.426	0.1901	0.1687	-0.3587	-0.3805	1.3707	78.6405	4.481	2.6155	5.7673	9.7748	5.8455
S127WTS013	Codilean et al. 2022	5990.59		4.9129	8.1651	0.17775	0.3788	0.5187	3.8803	5.1466	5.3385	40.1946	67.3903	98.5948	4.7565	5.3738	5.868	0.1186	0.2277	0.3069	5.9587	4.5121	4.0132	-0.5627	2.903	1.0613	0.4339	-2.0227	0.2827	0.2382	1.3056	6.7826	6.7292	3.502	4.5967	5.9648	4.3953	-0.6337	-1.1335	-1.0524	-1.5526	-1.4859	1.1436	0	7.8	0.1626	2.3026	9.2103	4.6052
S105WTS009	Codilean et al. 2022	2049.75		5.9853	7.7703	0.2772	0.5049	0.6329	3.9211	5.0847	5.1852	44.0328	66.8161	87.5243	3.7921	4.2476	4.6208	0.1644	0.2765	0.3647	5.8439	3.9793	3.2688	-0.5988	2.863	3.7727	0.478	-1.9477	0.275	0.2108	1.2362	6.3038	6.3702	1.0174	2.2805	4.9069	3.0086	-0.9892	-0.6642	-0.2938	-1.1397	-0.9266	1.1757	41.986	7.186	2.9619	4.3188	9.4745	5.8909
S188WTS028	Codilean et al. 2022	26903.3		3.4108	8.2441	0.32794	0.5843	0.7358	4.6042	5.4636	5.7024	75.9408	113.183	154.626	5.2771	5.6721	6.0613	0.2322	0.3824	0.4719	5.3707	4.4588	4.0979	-0.6808	10.184	15.8625	0.8426	-2.1037	0.3999	0.2284	1.287	6.4921	6.3449	2.4901	3.9659	5.2852	3.8071	-0.7478	-0.1772	-0.1519	-0.7265	-0.6988	1.5591	60.6046	5.675	3.267	2.3026	9.2103	4.6052
S207WTS028	Codilean et al. 2022	525.213		7.347	7.4917	0.47881	0.7811	0.9882	4.7766	5.5804	5.7254	100.865	142.995	194.099	5.8727	6.359	6.591	0.379	0.5716	0.6945	6.3244	4.6341	3.7028	0.2265	16.663	32.1249	0.7772	-1.8611	0.1852	0.2567	1.3618	6.8683	7.0192	4.3903	5.1381	7.2755	5.4942	-0.0376	-0.8242	-0.7883	-1.3394	-1.3116	0.8417	55.6835	4.878	3.0456	6.8822	13.0978	5.9918
S123WTS007	Codilean et al. 2022	5386.34		5.0192	8.1877	0.34364	0.5928	0.7261	4.6519	5.5327	5.7598	76.9962	125.981	178.487	5.3633	5.8702	6.3044	0.2253	0.3963	0.5261	4.9302	3.934	3.3837	-0.7456	0.2	1.1991	0.3526	-1.5645	0.2078	0.2401	1.3134	6.3717	6.1909	2.7983	3.9816	5.4809	3.8624	-1.43	0.0534	0.0939	-0.5544	-0.5115	1.6661	75.3535	4.481	2.9177	4.3314	9.2103	4.6796
S094WTS007	Codilean et al. 2022	5761.86		4.9518	7.9436	0.4647	0.684	0.763	4.8203	5.6148	5.7712	101.114	144.409	198.442	4.6674	5.2089	5.3521	0.3354	0.5191	0.6196	5.8943	4.303	3.5987	-1.5655	0	2.8788	0.1826	-0.7544	0.0818	0.182	1.2	5.5185	5.1544	1.1086	2.4314	4.8878	3.0006	-3.2724	0.1469	0.1435	-0.408	-0.4059	1.39	74.3917	5.153	2.4799	6.1134	9.567	5.9696
S094WTS006	Codilean et al. 2022	5455.58		5.0064	7.9436	0.4647	0.684	0.763	4.8203	5.6148	5.7712	101.114	144.409	198.442	4.6674	5.2089	5.3521	0.3354	0.5191	0.6196	5.8943	4.303	3.5987	-1.5655	0	2.8788	0.1826	-0.7544	0.0818	0.182	1.2	5.5185	5.1544	1.1086	2.4314	4.8878	3.0006	-3.2724	0.1469	0.1435	-0.408	-0.4059	1.39	74.3917	5.153	2.4799	6.1134	9.567	5.9696
S256WTS003	Codilean et al. 2022	50178.6		2.7875	8.1421	0.21732	0.419	0.562	4.2395	5.3093	5.498	47.7754	76.2077	121.318	4.4077	4.9591	5.2815	0.1314	0.2276	0.3153	5.5708	3.6566	3.0398	-1.7669	0.01	0.1713	0.1602	-0.7619	0.0998	0.1784	1.1738	5.3532	5.3902	0.34	1.5473	4.7225	2.598	-3.1768	0.3356	0.3653	-0.2329	-0.1946	1.4367	51.2419	6.961	3.3952	3.4802	9.2103	4.6329
S137WTS002	Codilean et al. 2022	747.436		6.9942	7.478	0.39357	0.6644	0.8917	4.3334	5.3806	5.5565	74.8219	118.394	162.539	5.115	5.8041	6.1627	0.2858	0.5025	0.6419	6.7089	4.5066	3.5778	0.4986	37.365	51.2707	1.0722	-2.2769	0.4244	0.2773	1.3819	7.2932	7.2793	3.9048	4.1958	6.8439	4.6259	1.0165	-0.8183	-0.8052	-1.3455	-1.3371	0.7214	17.6086	8.291	3.8436	6.3208	11.8313	5.6773
S076WTS025	Codilean et al. 2022	168.333		8.4849	7.964	0.5955	0.7587	0.9515	4.9583	5.67	5.8755	118.612	165.426	232.518	6.6095	6.9576	7.609	0.3736	0.5793	0.7202	5.5338	4.7887	4.066	-0.3593	20.217	24.1602	0.7407	-2.1982	0.1987	0.262	1.4012	6.5882	7.4444	4.8704	6.1004	7.3015	5.9878	-0.0843	-0.1394	-0.1664	-0.7527	-0.7554	1.5425	99.617	2.916	0.0745	6.4764	12.7056	5.8651
S178WST003	Codilean et al. 2022	28754.4		3.3443	7.9441	0.44129	0.6453	0.7225	4.7149	5.5032	5.6281	92.7236	128.825	171.555	4.5362	4.8331	5.2973	0.3119	0.4728	0.5519	6.0618	4.24	3.5436	-1.7292	0	0.6859	0.0819	-0.9918	0.0875	0.1886	1.2483	5.3396	5.1502	0.8454	2.2228	4.8289	2.9009	-3.386	0.2654	0.2601	-0.3004	-0.3023	1.3971	75.9739	5.004	2.1481	5.7474	10.0637	5.7936
S094WTS004	Codilean et al. 2022	28593		3.3499	7.9428	0.43988	0.6454	0.7226	4.7147	5.5033	5.6281	92.7177	128.829	171.583	4.5361	4.8331	5.2973	0.3119	0.473	0.5522	6.0618	4.24	3.5436	-1.7289	0	0.6823	0.0819	-0.9918	0.0875	0.1874	1.2434	5.3399	5.1502	0.8454	2.2228	4.8291	2.9014	-3.3857	0.2654	0.2601	-0.3004	-0.3023	1.3971	76.0548	4.996	2.1489	5.7494	10.0681	5.7952
S086WTS014	Codilean et al. 2022	168.995		8.481	7.952	0.59634	0.7583	0.9521	4.9613	5.6723	5.876	118.827	165.898	233.352	6.6144	6.9688	7.6107	0.3738	0.5797	0.7213	5.4787	4.7887	4.066	-0.3704	19.779	23.6621	0.7407	-2.1946	0.1936	0.262	1.4012	6.5687	7.4331	4.8456	6.0765	7.2892	5.9757	-0.1157	-0.1457	-0.1744	-0.7589	-0.7634	1.5425	99.6109	2.903	0.075	6.4759	12.7173	5.873
S186WTS008	Codilean et al. 2022	70310.6		2.4501	7.683	0.15275	0.2867	0.3924	3.3982	4.8755	4.9404	25.2996	39.0272	52.0844	4.213	4.6117	4.9525	0.0921	0.1558	0.218	6.9962	4.5438	3.9285	0.0517	80.383	80.2693	1.2242	-3.4327	0.5576	0.2847	1.4859	7.0485	7.0531	3.5176	4.711	6.3423	4.9189	0.8291	-1.9562	-1.9604	-2.1542	-2.1559	0.2144	1.4796	5.484	1.5953	4.8062	9.2103	5.3552
S206WTS007	Codilean et al. 2022	5872.31		4.9328	7.8209	0.35416	0.6151	0.7349	4.3796	5.3482	5.4821	71.4654	107.028	143.95	5.1707	5.5697	6.0045	0.2501	0.4134	0.5192	6.2125	4.6393	3.7984	-0.7611	0	1.4397	0.1538	-1.1686	0.0904	0.1766	1.2087	6.3699	6.4242	3.4438	4.4823	6.1758	4.5892	-1.5478	-0.1883	-0.2026	-0.7829	-0.7916	1.3544	39.1898	7.86	3.508	6.9824	10.9817	6.0164
S076WTS022	Codilean et al. 2022	366.699		7.7063	7.957	0.55433	0.7561	0.9365	4.876	5.601	5.8367	108.323	155.036	209.808	6.3294	6.6465	7.2861	0.3508	0.5501	0.6683	5.7005	4.8625	4.0969	-0.1634	23.381	38.8382	0.6415	-2.5158	0.2391	0.2625	1.4	6.8588	7.5186	4.6257	5.8166	7.0815	5.7187	0.234	-0.2317	-0.1502	-0.8047	-0.7375	1.7621	90.2285	2.415	0.7459	6.1228	11.4728	5.7528
S048WTS003	Codilean et al. 2022	34239.5		3.1697	8.0828	0.17899	0.4214	0.6136	4.2621	5.3334	5.6455	52.3021	84.1892	137.888	4.2415	4.7111	5.2718	0.1425	0.2576	0.3906	5.9387	3.8092	3.2148	-1.4932	0	0.4704	0.1215	-1.0599	0.1088	0.2063	1.2462	5.6741	5.5447	-0.1985	1.4139	4.679	2.5791	-2.8122	0.2201	0.2663	-0.3334	-0.2754	1.2506	27.8987	7.967	3.8323	4.2091	9.2103	4.6612
S048WTS007	Codilean et al. 2022	34326		3.1672	8.0828	0.17899	0.4214	0.6136	4.2621	5.3334	5.6455	52.3021	84.1892	137.888	4.2415	4.7111	5.2718	0.1425	0.2576	0.3906	5.9387	3.8092	3.2148	-1.4932	0	0.4704	0.1215	-1.0599	0.1088	0.2063	1.2462	5.6741	5.5447	-0.1985	1.4139	4.679	2.5791	-2.8122	0.2201	0.2663	-0.3334	-0.2754	1.2506	27.8987	7.967	3.8323	4.2091	9.2103	4.6612
S137WTS010	Codilean et al. 2022	11572		4.2545	7.5036	0.1626	0.3738	0.4694	3.1058	4.81	4.8773	23.8081	44.3561	57.0468	3.7139	4.1478	4.261	0.0858	0.1811	0.2447	7.421	4.7441	4.0359	-0.3441	49.482	63.1135	1.1453	-2.3613	0.5818	0.2703	1.402	6.8026	7.0511	3.5972	4.0206	6.5531	4.4479	0.5888	-1.5064	-1.4529	-1.8945	-1.8585	0.5596	33.4295	7.697	3.6862	2.3026	9.2103	4.6052
S071WTS037	Codilean et al. 2022	24905.3		3.488	7.8868	0.34363	0.5754	0.7033	4.2188	5.2892	5.5195	60.6258	94.7705	134.555	4.8749	5.3952	5.9368	0.205	0.3376	0.4634	6.3816	4.102	3.4719	-0.4001	27.111	25.7316	0.6756	-2.1742	0.3539	0.2839	1.4881	6.5346	6.394	2.892	3.9658	5.7232	4.0861	-0.6116	-0.8732	-0.5609	-1.2791	-1.0993	1.143	3.5606	8.355	2.3538	3.2567	9.2103	5.6027
S127WTS043	Codilean et al. 2022	1903.62		6.0593	8.0417	0.18362	0.3981	0.5551	3.3437	4.8693	4.9614	26.9146	46.6627	66.6635	3.2614	3.3806	4.0274	0.0959	0.1807	0.2823	7.0003	4.806	4.422	-0.6585	53.251	79.6429	1.3931	-2.5333	0.6429	0.1976	1.3843	6.7129	6.8341	1.2556	2.3126	4.901	2.8989	0.3223	0.2079	0.2803	-0.569	-0.4938	1.034	0	9.388	0	2.3026	9.2103	4.6052
S188WTS031	Codilean et al. 2022	25315.3		3.4717	8.1507	0.28028	0.5132	0.6908	4.3988	5.3659	5.5323	64.0177	101.172	142.379	5.2883	5.8571	6.0399	0.1945	0.327	0.4392	5.5552	4.5117	4.1201	-0.5681	9.826	23.1587	0.8677	-2.1337	0.4197	0.2356	1.2567	6.6195	6.5843	3.1299	4.4249	5.7115	4.2583	-0.4049	-0.2441	-0.2144	-0.7839	-0.7567	1.5739	34.4095	7.515	3.9054	2.3026	9.2103	4.6052
S086WTS016	Codilean et al. 2022	221.39		8.2109	7.8938	0.60031	0.759	0.954	4.9597	5.6701	5.883	118.885	166.241	234.591	6.6246	6.9797	7.6174	0.3724	0.5822	0.7242	5.3946	4.7206	3.9966	-0.4047	17.014	20.61	0.7407	-2.1716	0.1715	0.2633	1.4	6.5129	7.4038	4.7609	5.9956	7.2626	5.9516	-0.2246	-0.1515	-0.1785	-0.7644	-0.7672	1.538	99.5885	2.888	0.0792	6.4921	12.7719	5.9046
S026WTS021	Codilean et al. 2022	13534.3		4.0978	7.5423	0.13421	0.2306	0.3166	3.0878	4.7674	4.7995	18.0186	27.1794	36.9158	3.7412	4.0273	4.1515	0.0706	0.1146	0.1596	7.0142	4.604	4.0042	-0.0007	88.255	58.6984	1.1279	-3.6009	0.5567	0.2895	1.4771	6.9087	6.9327	3.3028	4.7454	6.2763	5.076	0.6836	-1.9296	-1.9228	-2.1456	-2.1413	0.2242	0	5.771	0	4.8584	9.2103	5.4691
S206WTS006	Codilean et al. 2022	2451.2		5.8065	7.7689	0.46651	0.7186	0.8517	4.7083	5.5261	5.6907	94.9712	135.561	181.968	5.3749	5.766	6.0332	0.3271	0.515	0.6211	6.5386	4.604	3.7696	-0.7232	0	5.7804	0.1894	-1.1533	0.0818	0.19	1.2518	6.3165	6.2208	3.2213	3.9652	6.0416	4.1807	-1.7158	-0.2938	-0.3284	-0.8716	-0.9009	1.444	47.061	6.83	3.1268	6.7994	12.2392	6.056
S226WTS021	Codilean et al. 2022	12008.5		4.2174	7.9578	0.27576	0.4834	0.6135	4.2041	5.2369	5.3693	54.2538	84.8393	115.049	4.7493	5.2759	5.512	0.1848	0.3099	0.406	6.456	4.1857	3.6548	-1.6501	0.067	1.0177	0.1118	-1.4376	0.1134	0.2481	1.3595	5.6232	6.406	2.6628	3.7054	5.5328	3.8205	-2.1811	-0.7533	-0.7074	-1.2424	-1.2003	1.0279	64.2482	4.985	3.148	3.7812	9.2103	4.7486
S156WTS015	Codilean et al. 2022	137189		1.7817	7.7578	0.04491	0.0803	0.1084	2.6322	4.663	4.6811	4.9519	6.7609	9.212	3.1602	3.4016	3.7367	0.0181	0.0276	0.0348	7.539	4.9071	4.275	-0.0049	90.022	69.6682	1.1024	-3.4933	0.6026	0.2585	1.4209	7.2551	7.2434	3.6011	4.3633	6.3522	4.5369	1.0665	-1.6529	-1.5474	-1.9798	-1.9072	0.3993	99.9773	2	0	2.3026	9.2103	4.6052
S123WTS008	Codilean et al. 2022	13028		4.136	8.0912	0.42066	0.6656	0.8055	4.7094	5.6688	5.8515	89.0294	145.946	213.689	5.7414	6.4558	6.7715	0.2636	0.4668	0.6008	4.7888	4.0885	3.5605	-0.4268	4.105	1.1353	0.4914	-1.9995	0.2344	0.255	1.3923	6.6705	6.5526	4.1414	5.1471	6.5361	4.9587	-0.8075	-0.1095	-0.0892	-0.652	-0.6296	1.6204	61.1646	5.774	3.2785	4.8877	9.5196	4.6697
S146WTS001	Codilean et al. 2022	5890.56		4.9297	7.545	0.30833	0.5569	0.6767	3.645	5.003	5.1155	42.7508	74.3759	95.2965	4.3991	4.9461	5.1641	0.1762	0.3206	0.4251	7.1611	4.8911	3.9015	0.646	52.225	72.2691	1.6325	-2.5705	0.6906	0.2676	1.4541	7.6018	7.3722	4.1645	4.5107	7.0209	4.8553	1.9025	-0.5361	-0.3709	-0.8887	-0.7294	1.6465	27.207	8.523	4.1497	5.2683	9.2103	4.6613
S061WTS021	Codilean et al. 2022	2115.8		5.9536	8.014	0.20958	0.3962	0.5526	3.3411	4.8693	4.9617	26.7812	46.6572	66.684	3.2566	3.3618	4.0402	0.0951	0.1797	0.2826	6.9931	4.802	4.4199	-0.659	53.009	79.1009	1.3931	-2.5282	0.6415	0.1976	1.3843	6.7117	6.8354	1.2427	2.2993	4.9046	2.9049	0.3194	0.2109	0.2818	-0.5651	-0.4909	1.034	0	9.385	0	2.3026	9.2103	4.6052
S273WTS003	Codilean et al. 2022	64932.3		2.5297	7.9062	0.06852	0.1246	0.1916	3.1953	4.8503	5.0027	15.2114	23.7493	38.837	3.7398	4.3634	4.9141	0.0382	0.0621	0.0968	6.6701	4.5409	4.0073	-0.3977	26.415	12.2084	0.9247	-2.4191	0.4757	0.2274	1.2238	6.9394	6.852	2.7798	3.6678	5.637	3.8301	0.1005	-2.062	-2.0395	-2.1919	-2.1804	0.27	58.6705	4.12	0	2.3026	9.2103	4.6052
S025WTS011	Codilean et al. 2022	4387.79		5.2242	8.0581	0.45967	0.6829	0.8125	4.8638	5.5605	5.6951	103.174	145.262	190.551	5.6472	6.038	6.2052	0.3171	0.4752	0.5577	6.748	4.3706	3.8224	-0.2643	20.287	15.8123	0.6752	-2.2091	0.3814	0.2606	1.3665	6.9508	7.061	3.3307	4.4586	5.9152	4.3653	0.1356	-0.5394	-0.5264	-1.0158	-0.9986	1.2232	0.2729	7.544	2.8341	6.919	9.8349	4.6325
S151WTS012	Codilean et al. 2022	476.132		7.4451	7.9385	0.48507	0.7584	0.9136	4.4457	5.3561	5.4646	88.1585	131.906	165.335	5.643	6.1659	6.3617	0.2991	0.4802	0.5944	8.5377	5.6804	4.7725	0.9985	88.901	74.2924	1.5465	-2.7166	0.6905	0.3224	1.3791	7.9637	7.8935	5.078	5.9015	7.5197	5.8183	2.618	-0.1162	-0.1187	-0.5679	-0.5757	2.0262	2.7349	5.944	1.7764	4.9919	9.2103	4.6178
S038WTS032	Codilean et al. 2022	84445.6		2.267	7.9653	0.047	0.0959	0.1684	2.9089	4.735	4.7952	10.6273	16.1644	24.7699	2.8186	2.9684	3.2151	0.0221	0.039	0.0662	6.1049	4.2158	3.68	-1.3435	0.347	0.3607	0.4286	-1.9812	0.2804	0.1813	1.1147	6.2126	6.2492	0.7061	2.0304	4.7987	2.8105	-1.6465	-1.7661	-1.6607	-2.0851	-2.0326	0.2705	99.7079	3.824	0.2563	2.3026	9.2103	4.6052
S255WTS001	Codilean et al. 2022	2801.4		5.6729	7.4536	0.3652	0.6337	0.7555	4.256	5.2189	5.3132	66.6298	97.6791	127.991	3.9368	4.2321	4.3708	0.2399	0.3831	0.4804	4.8432	3.8586	3.1326	-0.5839	18.487	21.1046	0.6602	-1.7065	0.3258	0.1887	1.1673	6.0338	5.9193	-0.0661	1.0781	4.7536	2.6503	-1.2321	-0.7201	-0.5259	-1.1871	-1.0996	1.3194	31.3698	7.642	3.9145	3.8955	10.1928	5.8094
S127WTS027	Codilean et al. 2022	9920.87		4.4084	7.9737	0.30826	0.536	0.6772	4.061	5.1374	5.2318	54.449	78.7337	101.948	4.1226	4.4416	4.766	0.1876	0.2995	0.3782	6.6365	4.5751	4.2394	-0.6032	31.399	22.8389	1.1746	-2.2721	0.516	0.2312	1.3299	6.7132	6.7377	1.717	2.7113	5.0651	3.1346	-0.0491	-1.1683	-1.1212	-1.5965	-1.5568	1.0434	0	7.391	0.5106	2.3026	9.2103	4.6052
S164WTS030	Codilean et al. 2022	26744.3		3.4167	8.0422	0.14141	0.3241	0.4766	3.3907	5.0064	5.1616	31.3974	64.7111	89.1478	4.5987	5.2617	5.8235	0.087	0.1969	0.31	9.1605	5.5026	4.638	0.8495	70.648	92.7056	1.4818	-2.5718	0.6683	0.2731	1.2972	8.3458	8.2838	5.521	6.9363	7.8465	6.7345	2.7813	-1.6235	-1.595	-1.9849	-1.9597	0.0608	100	2.006	0	2.3026	9.2103	4.6052
S048WTS002	Codilean et al. 2022	35694.3		3.1281	7.9805	0.26047	0.4296	0.6241	4.2535	5.3048	5.6633	52.309	83.8398	137.874	4.2249	4.6537	5.2921	0.1423	0.2569	0.3938	6.0033	3.8304	3.2416	-1.4389	0	0.5194	0.1215	-1.1313	0.1106	0.2127	1.2528	5.7379	5.5791	-0.1985	1.4139	4.6863	2.6039	-2.7366	0.1973	0.2458	-0.3557	-0.2949	1.2372	30.0141	7.694	3.813	4.2091	9.2103	4.6669
S023WTS024	Codilean et al. 2022	12460.2		4.1805	7.659	0.08296	0.1196	0.237	3.1891	4.8159	4.9534	15.4394	26.6955	41.8387	3.0222	3.3192	3.6349	0.0413	0.0702	0.1418	5.7616	3.9556	3.3898	-1.3326	8.147	7.4522	0.4357	-2.2916	0.1726	0.1658	1.1062	5.9647	5.813	-0.3624	1.1174	4.6982	2.607	-2.2933	-1.5545	-1.3783	-1.9769	-1.8708	0.5147	13.0835	5.551	1.7576	3.3733	9.2103	5.2208
S148WTS003	Codilean et al. 2022	476.458		7.4444	7.5764	0.49733	0.8114	0.9737	4.9572	5.6461	5.7828	113.123	162.417	213.18	6.0377	6.4428	6.6694	0.3995	0.6107	0.7077	4.6317	4.0381	3.1775	-0.1967	0	10.8679	0.1667	-1.3867	0.0546	0.2001	1.3536	6.6303	6.5645	3.9082	5.126	6.7638	5.4057	-1.0906	-0.4535	-0.4457	-0.9731	-0.9684	1.8883	57.3607	4.087	2.4982	6.9427	13.3446	6.0802
S009WTS064	Codilean et al. 2022	48592.7		2.8196	7.3705	0.06497	0.1233	0.1988	2.742	4.6942	4.7458	10.3452	18.0767	25.8894	2.9517	3.2285	3.4919	0.0353	0.0615	0.1037	6.5842	4.2824	3.5193	-0.071	13.165	31.7331	1.1752	-2.1611	0.647	0.2693	1.3783	6.7945	6.9839	2.8127	3.2584	6.0188	3.9102	0.9093	-1.6205	-1.5362	-1.974	-1.92	0.4082	32.0885	8.027	3.8599	2.3026	9.2103	4.6052
S086WTS017	Codilean et al. 2022	190.154		8.363	7.8884	0.60039	0.7586	0.9534	4.9602	5.6703	5.8834	118.82	166.476	234.939	6.6252	6.9833	7.618	0.3719	0.5817	0.7245	5.3946	4.7206	3.9966	-0.4102	16.73	20.3489	0.7407	-2.1689	0.1693	0.2633	1.4	6.5032	7.4038	4.7534	5.988	7.2604	5.9493	-0.2345	-0.1515	-0.1785	-0.7644	-0.7672	1.5326	99.5863	2.881	0.0796	6.4921	12.7769	5.909
S009WTS054	Codilean et al. 2022	17532.3		3.839	7.448	0.14043	0.259	0.3726	3.5295	4.9519	5.0702	25.2633	38.8631	59.9351	4.1478	4.5288	4.9709	0.0819	0.1343	0.1985	6.6722	4.4868	3.7287	0.1143	42.149	52.8336	1.219	-2.5575	0.6022	0.2722	1.2805	7.0044	6.996	3.1446	3.5542	6.2207	4.0922	0.9441	-1.3716	-1.3641	-1.8407	-1.837	0.503	97.7812	2.329	0.7641	4.6082	9.2103	5.0294
S009WTS006	Codilean et al. 2022	34884.4		3.151	7.1723	0.13482	0.2562	0.3224	3.3139	4.8621	4.9203	25.8455	40.4327	49.4829	3.7766	4.061	4.2598	0.1065	0.1769	0.2258	6.6999	4.375	3.5192	0.4165	72.008	70.7972	1.2775	-2.9188	0.5925	0.2782	1.423	7.0512	7.0378	2.8199	3.7378	6.1678	4.4727	1.185	-1.9221	-1.9255	-2.1186	-2.1203	0.3879	99.8469	2	0	5.3235	9.2103	5.5288
S071WTS017	Codilean et al. 2022	22084		3.6082	7.2072	0.28045	0.45	0.5519	3.7258	4.9893	5.0637	40.768	58.3528	72.2627	4.2361	4.643	4.8811	0.1622	0.2495	0.3111	6.0552	4.1263	3.5644	-0.4412	3.45	0.5956	0.5939	-1.9221	0.3071	0.2821	1.5015	6.5176	6.6808	2.8185	3.7866	6.1411	4.4872	-0.519	-1.0413	-0.751	-1.428	-1.2249	0.5671	0.4825	6.929	0.9413	3.9304	9.2103	5.7645
S218WTS017	Codilean et al. 2022	327269		0.9123	6.8619	0.09587	0.2432	0.3922	3.2067	4.7794	4.9418	18.0463	22.9506	62.7157	3.1857	3.529	3.8144	0.0588	0.094	0.205	4.8181	4.0868	3.373	-2.0276	0.244	0	0.1017	-1.5921	0.0888	0.1184	1.1154	5.1583	5.2046	-0.7402	0.6891	4.7359	2.6993	-3.5634	-1.8898	-1.8715	-2.1236	-2.1136	0.2705	78.6583	3.924	0	2.3026	9.2103	4.6052
S108WTS004	Codilean et al. 2022	793.329		6.9346	6.7436	0.52117	0.7708	0.9464	4.8106	5.5393	5.7665	101.958	141.942	194.333	5.695	5.9808	6.2765	0.3342	0.5162	0.6236	5.3623	4.2479	3.7024	-0.8753	30.99	41.2024	0.639	-2.5523	0.2316	0.2641	1.4085	6.0546	6.6523	2.364	3.4545	6.1167	4.5688	-1.0711	-0.5752	-0.495	-1.0602	-1.0147	1.1131	91.6038	2.746	0	4.8735	11.9978	5.8771
S143WTS020	Codilean et al. 2022	3044.08		5.5899	6.2426	0.30295	0.5331	0.6375	3.551	4.9207	5.0307	41.7209	64.0488	79.9348	4.2838	4.5525	4.925	0.1817	0.2884	0.3676	8.1265	4.759	4.0362	0.3632	75.327	84.3506	1.2545	-3.047	0.5755	0.2715	1.4934	7.3096	7.0428	2.7514	3.2501	6.8072	4.7775	1.1044	-0.7837	-0.7191	-1.3269	-1.2762	0.8845	0	12	4.6151	4.4474	9.2103	4.6464
S026WTS009	Codilean et al. 2022	49507.9		2.8009	6.3803	0.14958	0.2525	0.3608	3.0238	4.7698	4.8012	20.0725	33.6627	43.5182	3.6152	3.9892	4.1735	0.072	0.1439	0.2024	7.135	4.5687	3.9522	0.027	76.471	62.6834	1.0695	-3.2468	0.5418	0.2883	1.4819	7.0203	7.0196	1.8579	3.013	5.9729	4.4589	0.7403	-1.9812	-1.9519	-2.1654	-2.155	0.208	1.4238	8.422	3.7329	4.7967	9.2103	5.4034
S116WTS005	Codilean et al. 2022	253863		1.1663	6.5934	0.27243	0.4974	0.6313	3.527	4.9284	4.9966	41.5991	64.5586	80.414	3.6906	4.0601	4.1725	0.1573	0.263	0.3434	6.5883	4.5998	3.9291	-0.6806	87.1	38.2899	1.313	-2.9799	0.5674	0.2088	1.2334	6.6059	6.7454	1.4441	2.1788	5.5633	3.6258	0.0325	-2.1768	-2.1804	-2.3026	-2.3026	0.5156	0	5.165	0	2.3026	9.2103	4.6052
S116WTS004	Codilean et al. 2022	250738		1.1787	6.5925	0.27247	0.4975	0.6314	3.527	4.9282	4.9966	41.6008	64.5608	80.4245	3.6904	4.0609	4.173	0.1573	0.263	0.3434	6.5883	4.5998	3.9291	-0.6809	87.092	38.2148	1.313	-2.9799	0.5673	0.2088	1.2334	6.6057	6.7454	1.4441	2.1788	5.5639	3.6264	0.032	-2.1768	-2.1804	-2.3026	-2.3026	0.5156	0	5.166	0	2.3026	9.2103	4.6052
S135WTS019	Codilean et al. 2022	89157.5		2.2127	6.9892	0.1939	0.3273	0.4643	3.9914	5.1167	5.2349	42.3109	63.3866	88.701	4.7823	5.2746	5.6506	0.1319	0.2054	0.2713	6.3801	4.549	4.0824	0.135	37.721	21.1169	1.0284	-2.4248	0.4785	0.2472	1.2286	7.325	7.2948	3.3991	3.891	6.7991	4.7629	0.8937	-0.4996	-0.434	-0.8985	-0.8343	1.4494	0	7	0	2.3026	9.2103	4.6052
S127WTS023	Codilean et al. 2022	14792.2		4.009	6.8824	0.2546	0.4501	0.5675	3.8286	5.0335	5.1226	42.6653	63.6541	85.7766	4.0238	4.3593	4.6837	0.1519	0.2489	0.3173	6.6997	4.1157	3.8171	-1.0675	0.294	0	0.2955	-1.9214	0.1894	0.2523	1.4024	6.1898	6.2517	0.6323	2.1044	5.0431	3.3929	-1.6712	-0.7746	-0.7342	-1.231	-1.1829	1.0638	10.6036	6.499	0	2.5841	9.2103	4.6053
S151WTS006	Codilean et al. 2022	1452.38		6.3299	6.7997	0.42631	0.7116	0.8442	4.074	5.2234	5.3534	69.2025	109.8	135.053	5.0773	5.6144	5.8986	0.2516	0.4302	0.5334	8.5095	5.6679	4.7592	0.782	86.294	80.6401	1.617	-2.6795	0.7085	0.3301	1.3525	7.8795	7.7821	3.7982	4.5297	7.3207	5.5251	2.4044	-0.1269	-0.0588	-0.5957	-0.5339	2.026	0	6.867	2.352	2.3026	9.2103	4.6052
S009WTS005	Codilean et al. 2022	33604.1		3.1884	7.1723	0.13482	0.2562	0.3224	3.3139	4.8621	4.9203	25.8455	40.4327	49.4829	3.7766	4.061	4.2598	0.1065	0.1769	0.2258	6.6999	4.375	3.5192	0.4165	72.008	70.7972	1.2775	-2.9188	0.5925	0.2782	1.423	7.0512	7.0378	2.8199	3.7378	6.1678	4.4727	1.185	-1.9221	-1.9255	-2.1186	-2.1203	0.3879	99.8469	2	0	5.3235	9.2103	5.5288
S127WTS008	Codilean et al. 2022	2470.74		5.7985	7.3657	0.35335	0.5621	0.685	4.2913	5.2313	5.3195	67.7377	91.9633	114.919	4.5709	4.9331	5.102	0.2303	0.3411	0.4085	6.8989	4.1825	3.6518	-0.7925	9.289	0.965	0.3673	-2.1286	0.2483	0.2409	1.3367	6.5622	6.3078	1.3691	2.8173	5.157	3.5776	-1.2599	-0.7983	-0.7826	-1.3001	-1.2783	1.2173	0.5916	6.313	0	2.3026	9.2103	4.6052
S151WTS016	Codilean et al. 2022	879.661		6.8313	7.2847	0.55342	0.7941	0.9389	4.5846	5.3915	5.4817	101.099	139.625	176.013	5.7665	6.2069	6.4233	0.339	0.5019	0.606	8.4022	5.7399	4.7735	1.1701	93.049	74.664	1.5618	-2.7583	0.7056	0.3174	1.3341	8.0481	7.8672	4.3712	5.0712	7.4401	5.6172	2.7657	-0.2131	-0.2478	-0.6313	-0.6737	2.0962	5.0958	4.372	0	4.9833	9.2103	4.625
S261WTS046	Codilean et al. 2022	4325.37		5.2386	6.9787	0.18344	0.3421	0.489	3.5345	4.8908	4.9714	26.6873	39.5944	53.8273	3.4714	3.7371	3.8658	0.0908	0.1504	0.2114	5.5236	3.9307	3.2914	-1.3146	7.944	9.8464	0.3366	-2.2818	0.2176	0.1501	1.0782	5.9851	6.0518	-0.2095	1.1378	4.8002	2.8255	-1.9575	-1.1632	-1.0048	-1.6842	-1.5635	0.6573	0	8.518	3.136	3.9248	9.2103	5.3868
S261WTS047	Codilean et al. 2022	6648.45		4.8087	6.9787	0.18344	0.3421	0.489	3.5345	4.8908	4.9714	26.6873	39.5944	53.8273	3.4714	3.7371	3.8658	0.0908	0.1504	0.2114	5.5236	3.9307	3.2914	-1.3146	7.944	9.8464	0.3366	-2.2818	0.2176	0.1501	1.0782	5.9851	6.0518	-0.2095	1.1378	4.8002	2.8255	-1.9575	-1.1632	-1.0048	-1.6842	-1.5635	0.6573	0	8.518	3.136	3.9248	9.2103	5.3868
S149WTS008	Codilean et al. 2022	6880.86		4.7743	7.442	0.32173	0.507	0.6392	4.2645	5.2539	5.35	60.1289	84.9582	113.873	5.3197	5.7526	6.0761	0.1942	0.2901	0.3503	8.002	5.2909	4.5763	0.9765	90.747	98.0206	1.4422	-2.7242	0.679	0.3015	1.4296	8.1164	8.0598	4.4449	4.7848	7.3703	5.2025	2.7139	0.2199	0.2613	-0.2879	-0.2533	1.5827	92.6618	4.507	0	2.3026	9.2103	4.6052
S094WTS018	Codilean et al. 2022	5007.99		5.092	7.0284	0.46148	0.6949	0.8318	4.5547	5.3896	5.4737	87.2759	120.96	155.141	5.4983	5.8957	6.1016	0.3201	0.4776	0.5784	8.1993	4.9508	4.0304	-0.4818	7.555	14.7496	0.8598	-1.4541	0.2082	0.1974	1.2427	6.7133	6.9612	3.6259	4.4842	6.9704	5.283	-0.5673	-0.0015	0.0033	-0.6578	-0.6466	1.3154	70.2746	6.402	2.7109	7.3709	9.8042	5.7212
S188WTS023	Codilean et al. 2022	18785.2		3.77	6.7844	0.36864	0.631	0.7431	4.7382	5.565	5.7143	82.2418	128.621	179.415	5.3793	5.8429	6.1105	0.2596	0.4196	0.5084	4.6162	4.0656	3.3204	-0.9325	1.121	0.6134	0.3456	-1.6809	0.2012	0.2269	1.2651	6.0383	5.718	1.5123	2.6102	5.502	3.8244	-1.9953	-0.018	-0.0178	-0.5786	-0.5729	1.8123	68.7459	5.136	1.5375	2.3026	9.2103	4.6052
S135WTS005	Codilean et al. 2022	1252.69		6.4778	6.8139	0.38785	0.654	0.808	4.6802	5.4937	5.5841	83.6128	130.316	177.489	5.7519	6.1941	6.5303	0.2479	0.429	0.5289	8.1279	4.8609	4.2668	0.3986	48.913	36.4281	0.7365	-2.7181	0.4684	0.2561	1.3517	7.4209	7.7078	4.1856	4.6705	7.6744	5.6483	1.4225	-0.4829	-0.4557	-1.0818	-1.0581	1.4363	10.2288	6.488	0	2.3026	9.2103	4.6052
S127WTS045	Codilean et al. 2022	1088.78		6.618	6.6845	0.10831	0.2501	0.3927	3.1064	4.7498	4.7729	16.8246	24.5332	40.7657	3.1634	3.3556	3.4113	0.0574	0.0983	0.1763	6.8492	4.8405	4.4562	-0.7021	46.521	75.4834	1.3497	-2.4169	0.5737	0.1859	1.4089	6.6817	6.8052	0.1815	1.2122	4.9537	2.9782	0.0838	0.408	0.4869	-0.3474	-0.2564	1.027	0	9.407	0	2.3026	9.2103	4.6052
S092WTS011	Codilean et al. 2022	195420		1.4279	6.6944	0.16203	0.2685	0.366	3.4257	4.8827	4.9654	25.4912	36.5826	50.3481	4.2281	4.7239	4.8787	0.0866	0.1346	0.1688	7.0852	4.7345	4.1209	0.1506	17.651	26.243	0.9055	-2.3372	0.4928	0.2577	1.3799	7.3078	7.2471	2.8294	3.8388	6.5343	4.9604	0.9019	-2.0956	-2.0931	-2.2238	-2.2229	0.01	25.6056	7.837	0.7678	2.3026	9.2103	4.6052
S224WTS002	Codilean et al. 2022	11915.5		4.2252	6.3129	0.28335	0.4497	0.5463	3.7811	4.999	5.0476	40.647	59.6793	75.1422	4.5162	4.8788	5.0721	0.1539	0.2441	0.2981	7.0338	4.3875	3.5881	-0.4136	87.077	64.7678	1.2963	-3.4234	0.5576	0.1843	1.2286	6.8448	6.6866	2.4283	3.359	6.4749	4.8231	0.1601	-0.357	-0.2579	-0.8879	-0.7848	1.4952	68.8974	3.811	1.3457	2.3026	9.2103	4.6052
S123WTS009	Codilean et al. 2022	11269.5		4.281	6.7476	0.42061	0.7012	0.8255	4.9802	5.8406	5.991	102.511	172.313	240.863	6.0394	6.7896	6.8687	0.2883	0.5679	0.6614	4.8512	4.0918	3.5308	-0.5591	1.217	0.9983	0.3861	-1.9255	0.2294	0.2418	1.3409	6.5378	6.3334	4.306	5.3523	7.8467	6.3711	-1.1093	-0.0493	-0.0153	-0.596	-0.5658	1.646	95.5112	3.179	1.7027	3.3889	9.2103	4.6106
S156WTS021	Codilean et al. 2022	55510.9		2.6865	6.3511	0.15386	0.2904	0.4199	3.0973	4.8433	4.9561	23.4269	44.7218	64.8923	3.8757	4.3853	4.9602	0.076	0.1568	0.2462	7.8515	5.0623	4.3042	0.2064	98.341	93.697	1.3056	-3.6009	0.6418	0.2663	1.4049	7.4175	7.4499	2.8694	3.5038	6.8308	4.9269	1.5068	-1.2476	-1.204	-1.8598	-1.8295	0.5323	100	2	0	2.3026	9.2103	4.6052
S209WTS012	Codilean et al. 2022	12330.2		4.191	6.577	0.28143	0.5856	0.7354	4.1709	5.2873	5.4287	61.9924	104.438	146.979	5.8352	6.3624	6.8681	0.1834	0.369	0.4677	9.1632	5.7998	4.799	1.2249	23.802	69.2363	1.2096	-2.2653	0.6445	0.3097	1.655	8.439	8.5178	4.7097	5.6737	8.3849	6.8373	3.2061	0.06	0.1317	-0.4714	-0.3745	1.536	94.2832	3.037	0	2.3026	9.2103	4.6052
S075WTS008	Codilean et al. 2022	2247.63		5.8932	5.8462	0.40869	0.6441	0.791	4.0958	5.1828	5.2455	68.7311	99.0497	123.849	4.8586	5.3088	5.5126	0.2966	0.4711	0.5654	6.8184	4.6852	3.5925	0.3729	72.482	87.3715	0.982	-2.6693	0.4321	0.2133	1.2906	7.2542	7.1915	2.6542	3.336	7.0077	5.1551	0.8655	-0.9419	-0.9251	-1.4619	-1.4427	0.7796	75.419	3.665	2.241	6.837	10.2605	5.9614
S135WTS012	Codilean et al. 2022	15768.2		3.9451	6.7793	0.20859	0.3385	0.4635	4.1327	5.1521	5.2328	45.7068	66.1054	90.0915	4.8577	5.2592	5.3839	0.1438	0.2162	0.2724	6.2512	4.5538	3.84	0.1671	78.355	10.4443	1.0256	-2.6578	0.5329	0.2404	1.2262	7.2831	7.1532	2.9678	3.4162	6.588	4.5061	0.9385	-0.5944	-0.5987	-0.9975	-0.9862	1.4461	0	7	0	2.3026	9.2103	4.6052
S127WTS021	Codilean et al. 2022	18524.7		3.784	6.6697	0.24962	0.4429	0.5651	3.8455	5.0417	5.1376	42.9648	63.6528	86.6895	3.9874	4.2978	4.7207	0.1515	0.2491	0.3153	6.7069	4.1203	3.8255	-1.0741	0.102	0	0.2955	-1.9045	0.191	0.2538	1.4106	6.1769	6.243	0.4272	1.896	5.0377	3.3811	-1.6796	-0.7728	-0.7269	-1.2286	-1.1747	1.0589	12.8343	6.474	0	2.5841	9.2103	4.6053
S095WTS009	Codilean et al. 2022	18850.3		3.7665	7.5031	0.1366	0.2966	0.4858	3.4301	4.8889	4.9785	26.2577	47.0724	63.7236	3.5827	3.938	4.1259	0.0873	0.1768	0.2813	5.5164	3.9211	3.2494	-0.7685	0	4.5648	0.3666	-1.8892	0.1947	0.2174	1.2954	6.131	6.0956	1.2036	2.6266	5.042	3.3574	-1.5634	-0.64	-0.2185	-1.0936	-0.8269	1.1818	27.1688	8.283	3.8356	5.1393	9.7306	6.0264
S143WTS008	Codilean et al. 2022	574.565		7.2572	7.2508	0.5271	0.8291	1.0167	4.6192	5.4479	5.5729	107.027	149.359	191.414	5.7968	6.2321	6.44	0.3999	0.6044	0.7088	6.6317	4.8095	3.9062	0.2341	25.951	58.4171	0.9118	-2.0234	0.3469	0.2715	1.4288	7.0187	7.2427	4.3562	5.0826	7.4558	5.6588	0.5815	-1.0382	-1.0208	-1.5191	-1.5069	0.8802	87.6595	3.903	2.4314	6.1176	10.0962	5.7447
S108WTS041	Codilean et al. 2022	859.844		6.8541	7.7491	0.49874	0.75	0.9497	4.8426	5.6094	5.8597	103.796	151.446	221.045	5.906	6.1946	6.7614	0.3237	0.5183	0.6434	5.7877	4.4738	3.8924	-0.6075	41.263	43.6929	1.0858	-2.7257	0.2854	0.2772	1.446	6.3945	6.8912	4.0312	5.0081	6.7269	5.1375	-0.5219	-0.4997	-0.4189	-1.0153	-0.9605	1.1408	93.9648	2.904	1.8989	5.1114	12.6125	5.7251
S120WTS006	Codilean et al. 2022	403416		0.7031	7.9999	0.05693	0.1093	0.1417	2.4442	4.6333	4.6464	3.3323	5.2001	10.8453	3.0127	3.2057	3.8676	0.0152	0.0238	0.0336	8.3985	4.8696	4.5674	0.408	61.342	99.9806	1.414	-2.5485	0.5864	0.2695	1.2337	7.4811	7.3563	4.1056	5.1529	6.5813	5.0466	1.4358	-2.1371	-2.0731	-2.2118	-2.1742	0.4125	100	2	0	2.3026	9.2103	4.6052
S009WTS061	Codilean et al. 2022	44725.6		2.9025	7.1718	0.01883	0.0427	0.0586	2.4528	4.6313	4.6416	2.0858	2.8343	3.3689	2.6037	2.7182	2.8073	0.0083	0.0135	0.0182	6.4245	4.225	3.5198	-0.2674	51.546	58.4027	1.1063	-2.5863	0.5775	0.2486	1.3724	6.6496	6.6622	2.2864	2.7597	5.7721	3.6682	0.3025	-1.8439	-1.689	-2.0818	-1.9944	0.3473	0	9.322	3.862	2.3026	9.2103	4.6052
S075WTS005	Codilean et al. 2022	1672.55		6.1887	7.1582	0.47117	0.7298	0.8908	4.1651	5.2155	5.2791	77.1786	111.07	138.533	5.2571	5.6887	5.9398	0.3293	0.5167	0.6156	7.3926	4.9659	3.8271	0.8829	84.06	41.9469	1.101	-3.0119	0.5061	0.2218	1.2816	7.7059	7.7541	4.5985	4.9843	7.768	5.6471	1.9296	-0.6649	-0.6677	-1.215	-1.2147	1.0194	78.7522	3.383	2.033	7.0121	9.2103	5.8413
S235WTS007	Codilean et al. 2022	16207.2		3.9176	7.7003	0.13702	0.311	0.4735	3.4807	4.9228	5.0404	29.1183	53.0789	75.2411	3.9115	4.2713	4.5279	0.0906	0.1921	0.2794	6.5535	4.4023	3.7038	-1.6059	0	1.6215	0.2428	-1.4701	0.1728	0.1732	1.21	5.775	6.4721	2.6821	3.9087	5.7025	4.1885	-1.9359	-0.3747	-0.2589	-0.8785	-0.7664	1.5611	0	10.52	4.2318	5.0966	9.2103	4.7354
S273WTS004	Codilean et al. 2022	149798		1.6938	7.7461	0.08435	0.1426	0.2629	3.1806	4.8207	4.8824	17.6197	29.2271	43.4741	3.6396	4.2055	4.5864	0.052	0.0841	0.1502	6.5738	4.5426	4.021	-0.4954	18.649	3.6656	0.8712	-2.332	0.4742	0.2265	1.2215	6.8553	6.7778	2.7569	3.7222	5.7233	3.9968	-0.0415	-2.0786	-2.0699	-2.21	-2.2064	0.3964	53.0558	4.304	0	2.3026	9.2103	4.6052
S273WTS005	Codilean et al. 2022	119137		1.9228	7.7461	0.08435	0.1426	0.2629	3.1806	4.8207	4.8824	17.6197	29.2271	43.4741	3.6396	4.2055	4.5864	0.052	0.0841	0.1502	6.5738	4.5426	4.021	-0.4954	18.649	3.6656	0.8712	-2.332	0.4742	0.2265	1.2215	6.8553	6.7778	2.7569	3.7222	5.7233	3.9968	-0.0415	-2.0786	-2.0699	-2.21	-2.2064	0.3964	53.0558	4.304	0	2.3026	9.2103	4.6052
S108WTS042	Codilean et al. 2022	1858.68		6.0832	7.7237	0.52242	0.7536	0.9189	4.8344	5.5844	5.7609	105.868	146.196	197.859	5.659	6.0995	6.3901	0.3449	0.5183	0.6224	5.638	4.3681	3.784	-0.687	47.288	49.5904	0.7459	-2.6091	0.3417	0.2713	1.4313	6.3364	6.6103	3.1494	4.1985	6.0199	4.4198	-0.6766	-0.5209	-0.4597	-1.0222	-0.9811	1.124	85.7545	2.735	0	4.703	11.2872	5.69
S182WTS025	Codilean et al. 2022	9638.08		4.4373	7.7892	0.31967	0.4996	0.6047	3.8955	5.0517	5.1302	47.2504	67.1076	84.5732	4.6323	4.945	5.1659	0.1698	0.2625	0.3215	7.4654	4.7442	4.2858	-0.0828	53.24	93.6844	1.3622	-2.4781	0.616	0.3103	1.4802	7.1329	7.1781	3.6204	4.6248	6.3433	4.746	0.986	-1.0005	-0.4132	-1.3756	-1.1056	1.2639	0	6.181	0	2.3026	9.2103	4.6052
S164WTS004	Codilean et al. 2022	39673.8		3.0224	7.9368	0.09117	0.2313	0.5074	3.2638	4.8446	5.1397	31.4419	71.5239	100.822	4.0604	4.3828	5.3466	0.0589	0.1449	0.3276	7.9143	4.818	4.4249	-0.129	28.844	21.2731	1.0803	-2.1795	0.5383	0.25	1.325	7.3607	7.3435	4.3111	5.5037	6.8148	5.4364	0.8901	-1.1329	-1.0387	-1.6523	-1.5688	0.5133	99.9708	2.003	0.0288	2.3026	9.2103	4.6052
S094WTS014	Codilean et al. 2022	3854.6		5.3538	7.6108	0.50855	0.7415	0.917	4.8124	5.5528	5.7061	101.903	144.381	192.005	5.1294	5.5698	5.7216	0.3579	0.5442	0.6626	7.5195	4.5203	3.7033	-0.8986	0	2.0231	0.3046	-1.4859	0.0978	0.1951	1.2511	6.1385	5.8787	2.5715	3.1064	5.6858	3.6191	-2.1012	0.0307	0.0173	-0.6037	-0.6147	1.5374	54.1322	6.794	3.6916	7.0166	10.897	5.9462
S164WTS007	Codilean et al. 2022	24095.2		3.5211	7.9246	0.18554	0.4206	0.6311	3.7494	5.1963	5.3245	48.3833	90.8656	125.132	4.9812	5.8054	6.2562	0.1204	0.277	0.411	8.5722	5.2872	4.6632	0.5952	74.014	93.4978	1.4942	-2.6507	0.6785	0.3037	1.4912	8.0551	7.9847	5.0767	6.3251	7.5311	6.2448	2.3575	-1.4275	-1.3863	-1.8426	-1.8079	0.4057	100	2	0	2.3026	9.2103	4.6052
S086WTS019	Codilean et al. 2022	285.204		7.9576	7.6966	0.59508	0.7519	0.9528	4.8681	5.6075	5.8298	113.454	161.893	223.987	6.5611	6.8897	7.5957	0.3599	0.5722	0.7241	5.0668	4.65	3.8885	-0.4713	10.097	14.2975	0.4465	-2.0931	0.1196	0.2668	1.4159	6.3983	7.2927	4.4208	5.6747	7.1232	5.8238	-0.5059	-0.1716	-0.1967	-0.7835	-0.7853	1.5209	99.5027	2.952	0.0949	6.534	12.9315	5.9809
S127WTS020	Codilean et al. 2022	35538.6		3.1324	7.8613	0.18099	0.3629	0.4792	3.6747	4.9783	5.1217	33.1829	51.6894	74.5586	4.0909	4.4449	4.7618	0.1036	0.1836	0.2527	6.6571	4.1641	3.7696	-0.8793	0.144	0.047	0.2784	-1.7115	0.1897	0.2503	1.3943	6.3921	6.3151	1.8707	3.2938	5.17	3.5809	-1.4726	-0.7778	-0.6708	-1.2327	-1.1304	1.149	38.8086	5.753	0	2.3026	9.2103	4.6052
S220WTS011	Codilean et al. 2022	12403.3		4.1851	7.272	0.26402	0.4443	0.5353	2.994	4.7702	4.8432	23.6338	37.2055	50.4167	3.9811	4.2662	4.9286	0.1042	0.1643	0.2134	8.0878	4.809	3.757	0.621	99.848	90.693	1.4834	-3.6268	0.7499	0.2402	1.3529	7.5962	7.5092	4.169	4.985	7.2619	5.5458	2.1555	-0.4376	-0.409	-1.2976	-1.2946	1.1322	2.0551	7.009	1.4492	2.3026	9.2103	4.6052
S059WTS011	Codilean et al. 2022	25837		3.4513	7.9458	0.34812	0.5529	0.6978	4.3101	5.3488	5.4688	67.7399	101.364	135.189	4.9549	5.6749	5.8904	0.2312	0.3635	0.4598	6.4176	4.5105	4.3753	-0.8449	13.696	56.7968	1.1054	-2.2557	0.4775	0.22	1.3213	6.3809	6.4201	2.9971	4.3744	5.7559	4.3867	-0.6061	-0.091	-0.0785	-0.6324	-0.6218	1.5782	58.4861	5.037	2.819	2.3026	9.2103	4.6052
S230WTS013	Codilean et al. 2022	1340.16		6.4103	7.4074	0.51952	0.7645	0.9058	4.7424	5.5279	5.6668	111.181	152.814	193.357	5.6302	6.076	6.3126	0.4032	0.585	0.6685	4.7465	4.2152	3.4301	-0.4416	0.059	1.4629	0.5128	-1.5316	0.1583	0.2042	1.2382	6.521	6.5063	3.5072	4.8156	6.5538	5.2626	-1.0568	-0.4743	-0.4826	-1.0382	-1.0455	1.8394	27.4964	4.981	0.5052	6.0889	11.8074	5.9568
S071WTS027	Codilean et al. 2022	40381.6		3.0047	7.624	0.24999	0.4668	0.6011	3.5682	4.9409	5.0168	37.4996	59.3497	78.3536	4.1443	4.628	4.7675	0.1513	0.2552	0.3367	5.4928	4.0913	3.4036	-0.2709	0.393	4.4439	0.2994	-1.618	0.2006	0.2762	1.4452	6.5638	6.6104	3.2251	4.3813	6.152	4.6682	-0.7272	-0.8639	-0.4641	-1.2946	-1.0416	0.8881	38.494	6.509	3.2869	4.6748	9.225	5.9004
S143WTS002	Codilean et al. 2022	1254.33		6.4765	7.1491	0.47355	0.7415	0.8936	4.6044	5.4385	5.5379	95.0641	132.55	168.543	5.5568	6.0224	6.1231	0.361	0.5368	0.6291	7.3374	4.627	3.9032	-0.3352	42.105	59.8606	0.9806	-2.3016	0.4054	0.2697	1.402	6.4401	7.1876	3.6467	4.4592	6.8887	5.154	0.2527	-0.8451	-0.8433	-1.3583	-1.3575	0.7944	51.0048	7.035	3.6751	5.5754	9.7141	5.6767
S048WTS001	Codilean et al. 2022	35140.1		3.1437	7.8026	0.26563	0.4107	0.6249	4.2042	5.2626	5.7048	50.0924	78.7193	135.748	4.2202	4.6538	5.4413	0.1372	0.2458	0.3941	6.0966	3.8511	3.2726	-1.355	0	0.6176	0.1215	-1.2881	0.113	0.2153	1.262	5.8315	5.6373	-0.1985	1.4139	4.7008	2.6515	-2.6165	0.172	0.2211	-0.3766	-0.3129	1.2267	28.6711	7.64	3.9149	4.2091	9.2103	4.6782
S075WTS007	Codilean et al. 2022	5403.85		5.016	6.8815	0.36658	0.5829	0.6991	4.2285	5.2047	5.3534	64.6425	93.5078	123.171	5.0363	5.3378	5.5979	0.2431	0.3836	0.4847	6.0303	4.3791	3.3657	-0.045	55.188	64.9537	0.6533	-2.4974	0.3848	0.2293	1.3101	6.9028	6.6974	3.007	3.6819	6.5424	4.6618	-0.0001	-1.0759	-1.0838	-1.5726	-1.5784	0.7059	99.2904	2.078	0.5363	6.3295	9.8679	5.8477
S193WTS040	Codilean et al. 2022	883.744		6.8267	7.3986	0.63379	0.8245	0.9796	4.8299	5.5327	5.7262	119.293	159.926	204.738	5.8563	6.105	6.5675	0.4072	0.5929	0.6967	6.6002	4.4755	3.8546	0.2315	50.631	49.9314	0.9662	-2.6325	0.4034	0.295	1.3927	6.8097	7.1244	3.5929	4.4406	6.6351	4.9186	0.6253	-0.6086	-0.0015	-1.1332	-0.9024	0.9983	15.4695	8.658	3.3279	4.8182	9.2103	5.7132
S143WTS015	Codilean et al. 2022	874.628		6.837	6.9853	0.42263	0.6816	0.842	4.5645	5.4491	5.5652	89.9872	130.019	166.554	5.2956	5.8266	5.9399	0.3328	0.5027	0.6143	6.3527	4.4548	3.5597	0.2753	29.82	52.2171	0.9132	-2.0395	0.3446	0.2748	1.3673	7.1472	6.7848	3.0219	4.0196	6.4747	4.8844	0.2142	-0.8412	-0.8223	-1.3579	-1.344	0.9259	81.7225	5.16	2.8463	5.5782	9.2743	5.6923
S193WTS042	Codilean et al. 2022	831.658		6.8874	7.3969	0.63371	0.8242	0.9794	4.8284	5.5314	5.7187	119.291	159.934	204.815	5.8525	6.0995	6.5279	0.4072	0.5929	0.6968	6.6002	4.4755	3.8546	0.2316	50.573	49.8676	0.9662	-2.6325	0.4033	0.295	1.3927	6.8095	7.1244	3.5929	4.4406	6.6364	4.92	0.6251	-0.6086	-0.0015	-1.1332	-0.9024	0.9983	15.3396	8.665	3.3294	4.8182	9.2103	5.714
S064WTS013	Codilean et al. 2022	1601.11		6.2324	7.4	0.624	0.8247	0.9795	4.8325	5.5337	5.7389	119.542	160.061	205.062	5.8605	6.1099	6.6099	0.4073	0.5929	0.6968	6.6002	4.4755	3.8546	0.2314	50.762	49.989	0.9662	-2.6325	0.4058	0.295	1.3927	6.8099	7.1221	3.5929	4.4406	6.6339	4.9174	0.6295	-0.5978	-0.0015	-1.1245	-0.9024	0.9969	15.3814	8.669	3.3301	4.8164	9.2103	5.7127
S064WTS001	Codilean et al. 2022	1470.62		6.3174	7.4	0.624	0.8247	0.9795	4.8325	5.5337	5.7389	119.542	160.061	205.062	5.8605	6.1099	6.6099	0.4073	0.5929	0.6968	6.6002	4.4755	3.8546	0.2314	50.762	49.989	0.9662	-2.6325	0.4058	0.295	1.3927	6.8099	7.1221	3.5929	4.4406	6.6339	4.9174	0.6295	-0.5978	-0.0015	-1.1245	-0.9024	0.9969	15.3814	8.669	3.3301	4.8164	9.2103	5.7127
S193WTS039	Codilean et al. 2022	638.892		7.1511	7.3959	0.63367	0.8241	0.9794	4.8267	5.5306	5.7156	119.243	159.925	204.585	5.8505	6.0966	6.5066	0.4072	0.5928	0.6969	6.6002	4.4755	3.8546	0.2316	50.533	49.8251	0.9662	-2.6325	0.403	0.295	1.3927	6.8093	7.1244	3.5929	4.4406	6.6372	4.9209	0.6243	-0.6086	-0.0015	-1.1332	-0.9024	0.9983	15.2572	8.67	3.3303	4.8182	9.2103	5.7146
S193WTS038	Codilean et al. 2022	614.282		7.1904	7.3958	0.63366	0.8241	0.9795	4.8267	5.5306	5.7152	119.243	159.925	204.585	5.8501	6.0961	6.5025	0.4072	0.5928	0.6969	6.6002	4.4755	3.8546	0.2316	50.529	49.8251	0.9662	-2.6325	0.403	0.295	1.3927	6.8093	7.1244	3.5929	4.4406	6.6373	4.921	0.6243	-0.6086	-0.0015	-1.1332	-0.9024	0.9983	15.2479	8.671	3.3304	4.8182	9.2103	5.7146
S193WTS041	Codilean et al. 2022	697.294		7.0636	7.3955	0.63362	0.824	0.9793	4.8267	5.5306	5.7148	119.231	159.918	204.629	5.8492	6.0948	6.4927	0.4071	0.5927	0.6966	6.6002	4.4755	3.8546	0.2316	50.508	49.8251	0.9662	-2.6325	0.403	0.295	1.3927	6.8093	7.1244	3.5929	4.4406	6.6376	4.9213	0.6243	-0.6086	-0.0015	-1.1332	-0.9024	0.9983	15.2223	8.672	3.3307	4.8182	9.2103	5.7146
S071WTS016	Codilean et al. 2022	21953.1		3.6142	7.3746	0.33242	0.5312	0.6505	4.0061	5.1488	5.2707	53.2927	77.7527	104.795	4.6778	5.0348	5.5462	0.1965	0.3079	0.3832	6.0733	4.0767	3.5039	-0.4076	5.37	2.2445	0.6517	-1.9072	0.3057	0.2827	1.5182	6.5289	6.6815	3.1058	4.0645	6.2451	4.5955	-0.4964	-0.9623	-0.6661	-1.3641	-1.204	0.6302	7.9773	6.788	0.9321	4.125	9.2103	5.7827
S133WTS017	Codilean et al. 2022	50614.9		2.7788	7.4654	0.18032	0.3218	0.4604	3.445	4.8992	4.9598	30.3371	48.1444	64.836	3.9094	4.37	4.5468	0.1041	0.1715	0.2338	7.6903	4.865	4.2443	0.4529	69.763	58.221	1.516	-2.5145	0.6545	0.3151	1.6094	7.4504	7.422	3.8119	3.9818	6.7718	4.4454	1.7039	-2.2146	-2.2146	-2.3026	-2.3026	0.0343	0.1203	7.233	1.9712	2.3026	9.2103	4.6052
S143WTS018	Codilean et al. 2022	2327.82		5.8581	7.0066	0.44298	0.7446	0.9067	4.2999	5.267	5.3746	84.9171	123.973	155.909	5.11	5.4655	5.6842	0.3171	0.5258	0.6336	7.0045	4.6131	3.7737	0.0555	20.597	56.6513	0.9478	-2.0472	0.3703	0.2743	1.3799	6.979	7.003	3.4657	4.0803	6.8443	4.9227	0.3007	-0.7298	-0.671	-1.2542	-1.2123	0.8837	47.4466	7.177	3.9051	5.6085	9.2103	5.5577
S188WTS002	Codilean et al. 2022	28552.9		3.3513	7.6173	0.27921	0.5234	0.6587	4.4966	5.4251	5.5655	63.9162	98.358	143.134	4.3945	5.0033	5.137	0.1863	0.3046	0.3925	5.9534	3.7948	3.1656	-1.5683	0.15	0.7339	0.1662	-1.1114	0.1206	0.2046	1.1996	5.5895	5.5431	-0.4323	0.9392	4.6955	2.5723	-2.8401	0.1974	0.1993	-0.3508	-0.3487	1.2911	55.6708	6.588	3.3062	4.5169	9.2103	4.6494
S127WTS004	Codilean et al. 2022	15835.6		3.9408	7.5845	0.28615	0.4935	0.5986	3.9352	5.0699	5.1439	46.9967	68.266	86.6232	4.345	4.7135	4.838	0.1642	0.2651	0.3278	6.5729	4.3016	3.793	-0.7653	14.426	4.6892	0.4446	-2.2137	0.2949	0.2368	1.2943	6.587	6.6124	1.8134	3.0729	5.2649	3.6128	-0.8565	-0.775	-0.7514	-1.3406	-1.3093	1.1293	0	6.593	0	2.3026	9.2103	4.6052
S188WTS038	Codilean et al. 2022	9897.97		4.4107	7.4104	0.37228	0.6298	0.7592	4.7858	5.6041	5.7804	85.6779	127.56	188.318	5.636	6.0918	6.314	0.2619	0.4236	0.5255	4.6248	4.1388	3.4983	-0.6811	2.757	3.2145	0.4209	-1.8721	0.2258	0.2185	1.2616	6.2964	6.1477	2.5081	3.7359	5.7711	4.2762	-1.371	-0.0008	0.0009	-0.5604	-0.5543	1.7915	76.347	4.521	1.5251	3.8841	9.2103	4.6171
S026WTS026	Codilean et al. 2022	10613.4		4.3409	6.816	0.10906	0.1907	0.266	3.0205	4.7523	4.7871	15.7091	23.7713	31.429	3.6871	3.9141	4.1187	0.0568	0.0952	0.1298	7.2906	4.6764	4	0.1186	97.723	62.2225	1.1366	-4.0174	0.5712	0.2946	1.5164	7.0395	7.0885	2.8132	3.9026	6.4283	4.9185	0.9459	-1.8965	-1.8985	-2.1186	-2.1194	0.2735	0	7	0	4.9516	9.2103	5.4424
S143WTS021	Codilean et al. 2022	1836.89		6.095	6.7044	0.28972	0.4866	0.6439	3.8854	5.0678	5.1234	49.3499	71.8918	94.5337	4.418	4.8662	5.0503	0.198	0.2902	0.3931	7.9992	4.7526	3.9816	0.4395	81.3	80.4507	1.1774	-3.1917	0.586	0.267	1.4317	7.3567	7.0726	3.1141	3.6366	6.7745	4.7655	1.2155	-0.7508	-0.6731	-1.2794	-1.2262	0.8989	5.3464	11.31	4.5335	4.6156	9.2103	4.708
S009WTS008	Codilean et al. 2022	39731.8		3.0209	6.8327	0.14238	0.2513	0.3148	3.3261	4.8613	4.9123	25.1827	39.1348	48.8355	3.7982	4.1595	4.3404	0.1039	0.1725	0.2198	6.6915	4.3907	3.5256	0.4453	71.766	73.0136	1.2337	-2.9132	0.5904	0.2771	1.4053	7.0789	7.0573	2.5244	3.4346	6.18	4.4797	1.2182	-1.9262	-1.9303	-2.1203	-2.1219	0.3905	99.8333	2	0	5.3822	9.2103	5.5446
S127WTS005	Codilean et al. 2022	32273.3		3.2288	7.5903	0.24775	0.4598	0.5941	3.8783	5.0576	5.1624	42.5685	64.4582	87.7308	4.3479	4.7832	5.1783	0.141	0.2359	0.3078	5.9683	4.432	3.9816	-0.7622	14.396	0.4497	0.5801	-2.2275	0.3124	0.2356	1.319	6.6002	6.4282	1.9081	3.0501	5.309	3.5923	-0.9665	-0.7164	-0.6966	-1.3209	-1.291	1.1271	0	6.616	0	2.3026	9.2103	4.6052
S164WTS048	Codilean et al. 2022	111937		1.9851	7.6188	0.0363	0.068	0.1019	2.7194	4.671	4.6835	5.8938	7.4691	10.3685	3.4121	3.7015	4.1238	0.0175	0.0255	0.0352	7.4443	4.907	4.4303	-0.2319	8.003	37.0772	1.0307	-2.0122	0.4779	0.2278	1.2655	7.2538	7.2448	3.8873	5.3416	6.7099	5.5737	0.5695	-1.5159	-1.4118	-1.8852	-1.7952	0.0841	97.9418	4.165	1.1178	2.3026	9.2103	4.6052
S091WTS001	Codilean et al. 2022	5533.37		4.9923	6.5729	0.14956	0.2836	0.407	3.2479	4.8406	4.8956	24.3733	37.9559	50.312	3.6596	4.0756	4.2132	0.1054	0.1812	0.2512	6.058	4.2187	3.2958	0.5202	84.371	71.5016	0.9721	-2.7031	0.4687	0.2603	1.3364	6.8622	6.6429	2.2472	2.7664	6.1437	4.1029	0.6027	-1.2673	-1.195	-1.6772	-1.6215	0.9151	0.3765	6.981	0	4.8626	9.3518	5.3554
S188WTS001	Codilean et al. 2022	62684.6		2.5649	7.3394	0.26813	0.5174	0.6539	4.5366	5.4424	5.6291	64.9205	100.167	147.638	4.59	4.8664	5.0098	0.1788	0.2957	0.4092	5.6353	3.7056	3.0551	-1.7381	0	0.3221	0.1245	-0.9894	0.1117	0.1702	1.1157	5.3927	5.4283	-0.6852	0.7816	4.696	2.5981	-3.0911	0.3011	0.2762	-0.2432	-0.2675	1.2894	23.4431	8.394	3.8707	4.6127	9.2103	4.6204
S226WTS024	Codilean et al. 2022	33315.6		3.197	7.24	0.25278	0.4555	0.5622	4.0301	5.1765	5.2873	47.5448	75.2722	96.7622	4.4035	4.8419	5.2941	0.1693	0.2894	0.3689	6.5684	4.1609	3.5686	-1.6641	0	1.5553	0.1053	-1.3935	0.1165	0.2474	1.349	5.5993	6.4015	2.0102	3.0286	5.5509	3.8252	-2.1876	-0.7829	-0.74	-1.262	-1.2215	1.027	64.851	4.939	3.3187	4.0341	9.2103	4.7822
S143WTS007	Codilean et al. 2022	570.662		7.264	6.6351	0.525	0.8313	1.0374	4.6853	5.4803	5.6013	106.136	148.367	198.364	5.9258	6.3814	6.4745	0.3965	0.6097	0.7215	6.4293	4.781	3.8687	0.2995	24.049	52.4242	0.7515	-1.959	0.3169	0.2701	1.4292	7.0487	7.3044	3.835	4.548	7.4931	5.6842	0.606	-0.9655	-0.966	-1.4645	-1.4649	0.8774	85.3652	4.141	2.5039	6.2998	10.0074	5.8411
S138WTS009	Codilean et al. 2022	16066.6		3.9263	6.7786	0.35259	0.5837	0.7128	4.087	5.1649	5.2579	64.7234	97.1007	122.356	4.5445	4.7831	5.2894	0.2494	0.4005	0.4978	7.1741	4.4893	3.7431	-0.2117	54.945	52.9638	1.1111	-2.7473	0.5143	0.2321	1.3329	6.8879	6.86	2.7955	3.343	6.4416	4.4417	0.3498	-1.5223	-1.4983	-1.9146	-1.8971	0.3349	85.6709	3.45	2.0919	5.3321	9.2103	4.8113
S188WTS029	Codilean et al. 2022	60051.6		2.6079	7.4139	0.23117	0.4661	0.6394	4.1676	5.3722	5.6544	53.0476	89.8306	142.46	4.7029	5.3341	6.201	0.1671	0.3049	0.4345	5.3875	4.4893	4.1284	-1.0831	9.768	32.0369	0.8116	-1.987	0.3792	0.2125	1.2748	6.0758	6.0889	1.5775	3.0285	5.2296	3.6998	-1.3279	-0.0937	-0.0218	-0.6669	-0.591	1.6207	32.774	8.166	4.0471	2.3026	9.2103	4.6052
S151WTS015	Codilean et al. 2022	107.786		8.9307	7.2357	0.5511	0.7918	0.9352	4.5807	5.3861	5.4697	100.535	138.701	174.415	5.7537	6.1748	6.4041	0.3374	0.4999	0.6033	8.3961	5.7418	4.7711	1.1862	92.97	75.1867	1.5618	-2.7583	0.7052	0.3165	1.3402	8.057	7.8659	4.305	4.9903	7.4209	5.5834	2.7758	-0.2193	-0.2545	-0.6381	-0.6796	2.0962	5.3345	4.329	0	4.9833	9.2103	4.626
S151WTS014	Codilean et al. 2022	287.486		7.9496	7.2357	0.5511	0.7918	0.9352	4.5807	5.3861	5.4697	100.535	138.701	174.415	5.7537	6.1748	6.4041	0.3374	0.4999	0.6033	8.3961	5.7418	4.7711	1.1862	92.97	75.1867	1.5618	-2.7583	0.7052	0.3165	1.3402	8.057	7.8659	4.305	4.9903	7.4209	5.5834	2.7758	-0.2193	-0.2545	-0.6381	-0.6796	2.0962	5.3345	4.329	0	4.9833	9.2103	4.626
S082WTS021	Codilean et al. 2022	6843.87		4.7797	7.2158	0.3695	0.5885	0.6751	4.5233	5.3628	5.445	76.8517	110.421	141.402	5.2795	5.7287	5.8518	0.2554	0.4063	0.4806	6.6542	4.2189	3.5725	-1.6748	0.006	3.1571	0.1461	-1.7373	0.1136	0.2479	1.3356	5.5578	6.0078	2.5098	3.7562	5.9014	4.4532	-2.541	-0.6694	-0.6272	-1.1587	-1.1236	1.0307	84.5671	3.462	2.0115	3.3772	9.2103	5.0614
S124WTS001	Codilean et al. 2022	12649.8		4.1654	6.9206	0.21489	0.5111	0.675	3.6553	5.004	5.1399	44.2589	80.8794	106.583	4.6922	5.1386	5.4955	0.1424	0.3068	0.433	7.4499	5.1642	4.1115	0.2744	56.993	70.9034	1.3896	-2.373	0.6091	0.2302	1.3653	7.3864	7.2662	3.8732	4.7268	7.2886	5.6095	1.3159	0.0551	0.1189	-0.68	-0.6105	1.2782	59.2667	6.455	3.7095	7.1108	10.456	4.8695
S220WTS014	Codilean et al. 2022	7209.59		4.7277	6.6776	0.27469	0.4611	0.5601	3.2573	4.8716	4.9447	31.6126	49.8244	63.0382	4.2421	4.7237	4.9062	0.1342	0.2137	0.2756	8.0529	4.9143	3.8123	0.8685	99.954	92.0907	1.4384	-3.6009	0.7641	0.2368	1.3494	7.7841	7.6513	3.7901	4.5972	7.4153	5.6953	2.5031	-0.3491	-0.3313	-1.1924	-1.1934	1.2024	17.6749	6.349	1.0804	2.3026	9.2103	4.6052
S220WTS012	Codilean et al. 2022	7776.51		4.652	6.6776	0.27469	0.4611	0.5601	3.2573	4.8716	4.9447	31.6126	49.8244	63.0382	4.2421	4.7237	4.9062	0.1342	0.2137	0.2756	8.0529	4.9143	3.8123	0.8685	99.954	92.0907	1.4384	-3.6009	0.7641	0.2368	1.3494	7.7841	7.6513	3.7901	4.5972	7.4153	5.6953	2.5031	-0.3491	-0.3313	-1.1924	-1.1934	1.2024	17.6749	6.349	1.0804	2.3026	9.2103	4.6052
S220WTS013	Codilean et al. 2022	7664.6		4.6665	6.6776	0.27469	0.4611	0.5601	3.2573	4.8716	4.9447	31.6126	49.8244	63.0382	4.2421	4.7237	4.9062	0.1342	0.2137	0.2756	8.0529	4.9143	3.8123	0.8685	99.954	92.0907	1.4384	-3.6009	0.7641	0.2368	1.3494	7.7841	7.6513	3.7901	4.5972	7.4153	5.6953	2.5031	-0.3491	-0.3313	-1.1924	-1.1934	1.2024	17.6749	6.349	1.0804	2.3026	9.2103	4.6052
S220WTS010	Codilean et al. 2022	11305.5		4.2778	6.6969	0.28753	0.4538	0.5337	3.0993	4.7898	4.8442	23.036	34.8914	45.6764	3.9577	4.373	4.8292	0.1007	0.1529	0.1922	8.0033	4.7232	3.6976	0.5682	99.992	95.3829	1.4527	-3.5791	0.7626	0.2415	1.3409	7.557	7.5137	3.5371	4.3578	7.1636	5.4485	2.1523	-0.3598	-0.3578	-1.2627	-1.287	1.1873	1.0777	6.979	0.5076	2.3026	9.2103	4.6052
S051WTS002	Codilean et al. 2022	149249		1.6974	7.2756	0.13695	0.245	0.3229	2.8175	4.7155	4.7643	12.7734	20.7811	30.3077	3.4152	3.6142	4.2447	0.0474	0.0805	0.1282	7.9294	4.9975	4.3222	0.1699	36.255	5.2749	1.2678	-2.4488	0.4764	0.2391	1.2245	7.3174	7.4762	3.243	4.2313	6.4346	4.8319	1.0704	-1.8214	-1.779	-2.0549	-2.0303	0.3097	93.0075	2.263	1.2556	2.3026	9.2103	4.6052
S023WTS033	Codilean et al. 2022	39848.4		3.018	6.9742	0.06258	0.1253	0.2062	3.0571	4.7664	4.8401	19.6889	23.9296	34.616	2.9655	3.133	3.6989	0.0432	0.0848	0.13	5.4239	4.0087	3.4217	-1.4182	1.443	1.0266	0.2888	-2.2331	0.1852	0.1561	1.0853	5.9433	5.8479	1.0289	2.3625	5.1664	3.5123	-2.2958	-1.4069	-1.2225	-1.8812	-1.7603	0.6246	11.1153	7.252	2.8305	3.2997	9.2103	4.8898
S182WTS035	Codilean et al. 2022	6881.44		4.7742	7.2002	0.32762	0.5064	0.6063	3.8836	5.0505	5.1107	47.6416	68.1043	83.9968	4.6596	4.9606	5.2169	0.1722	0.2646	0.3195	7.441	4.7387	4.2706	-0.1062	54.391	95.9543	1.3259	-2.4925	0.615	0.3042	1.4623	7.1079	7.1655	3.0284	4.034	6.3149	4.7156	0.9548	-0.9473	-0.3993	-1.3292	-1.0692	1.0625	0	6.064	0	2.3026	9.2103	4.6052
S182WTS033	Codilean et al. 2022	7450.85		4.6947	7.1958	0.32739	0.5059	0.6059	3.8876	5.0505	5.1108	47.6325	68.0833	84.0093	4.661	4.9624	5.2201	0.172	0.264	0.3193	7.441	4.7387	4.2706	-0.1064	54.373	95.9388	1.3259	-2.4925	0.6151	0.3042	1.4623	7.1075	7.1655	3.0284	4.034	6.3182	4.7193	0.9549	-0.9473	-0.3993	-1.3292	-1.0692	1.0625	0	6.062	0	2.3026	9.2103	4.6052
S188WTS026	Codilean et al. 2022	54654.6		2.702	7.3675	0.29139	0.5308	0.6751	4.5702	5.4502	5.6902	67.4297	100.932	149.368	5.3091	5.6317	6.3937	0.1973	0.3237	0.426	5.0778	4.2089	3.6211	-1.2418	2.63	2.7367	0.5277	-2.0612	0.2523	0.205	1.2331	5.8583	6.0583	1.6851	3.0915	5.3028	3.7812	-1.806	-0.1475	-0.1239	-0.6844	-0.6584	1.6055	72.8324	5.303	2.307	2.3026	9.2103	4.6052
S023WTS018	Codilean et al. 2022	5775.34		4.9495	6.9246	0.10388	0.1868	0.3348	3.3907	4.9053	5.0092	19.769	34.9381	52.1683	3.3455	3.6015	3.9341	0.0605	0.1124	0.1988	5.928	3.942	3.3065	-1.081	23.166	18.5153	0.748	-2.4628	0.2512	0.1692	1.0915	6.1911	6.1299	-0.3106	0.9107	4.791	2.7566	-1.6249	-1.4469	-1.2946	-1.9173	-1.8239	0.521	10.3014	5.888	0.7475	3.9402	9.2103	5.373
S137WTS007	Codilean et al. 2022	9325.93		4.4703	6.6263	0.25854	0.4225	0.4966	3.6937	4.9577	5.0332	39.2614	55.6589	70.0539	4.2469	4.5144	4.7399	0.1421	0.2221	0.2645	7.1568	4.5743	3.8789	-0.0012	53.145	79.4051	1.2154	-2.7151	0.6142	0.2687	1.3673	6.9908	7.0701	2.5231	2.9262	6.3278	4.1979	0.9509	-1.2344	-1.2532	-1.7277	-1.7378	0.5086	97.1919	2.371	1.2922	4.7637	9.2103	4.6738
S048WTS004	Codilean et al. 2022	74420.1		2.3933	6.6607	0.15032	0.2778	0.4349	3.7233	4.9844	5.0642	33.4423	52.6197	73.6633	3.7009	4.0404	4.3321	0.1032	0.1797	0.2642	6.1141	3.8898	3.3078	-1.2759	0	0.8469	0.1142	-1.4384	0.1135	0.2308	1.3239	5.9156	5.7163	-0.8604	0.931	4.7431	2.8584	-2.4871	0.1699	0.2354	-0.3703	-0.2938	1.218	6.4294	8.141	3.8137	4.7368	9.2103	4.6758
S261WTS018	Codilean et al. 2022	6746.42		4.7941	6.2468	0.13574	0.2706	0.4304	3.4815	4.8778	4.9298	21.878	34.1422	45.0133	3.6329	4.0333	4.1451	0.0708	0.1249	0.1764	5.7004	4.013	3.3246	-1.174	17.527	9.8103	0.3882	-2.3392	0.2655	0.1411	1.0556	6.1986	6.256	-0.064	1.56	4.9939	3.4003	-1.5503	-1.1747	-1.0706	-1.7187	-1.6435	0.659	1.9748	8.174	2.7583	4.2845	9.2103	5.3909
S026WTS001	Codilean et al. 2022	38694.2		3.0474	6.1599	0.07445	0.1344	0.1802	2.7524	4.6846	4.6997	7.9986	11.4202	14.3162	3.0911	3.3249	3.384	0.0295	0.0462	0.0587	7.5042	4.7685	4.096	-0.004	61.769	36.9783	0.9379	-2.9546	0.5317	0.288	1.5078	7.0879	7.1555	2.1342	3.0811	6.336	4.6861	0.8069	-1.7499	-1.6618	-2.1136	-2.0754	0.2706	86.9744	2.946	2.2465	4.0281	9.2103	5.0873
S086WTS012	Codilean et al. 2022	282.799		7.9661	6.4666	0.57645	0.7907	0.9946	4.9113	5.6406	5.8127	120.267	171.149	230.543	6.2702	6.4942	7.1395	0.3938	0.6218	0.7841	5.2221	4.6461	3.9395	-0.4311	6.455	13.8198	0.376	-2.0054	0.1137	0.2642	1.3963	6.4435	7.2048	3.3479	4.5942	7.1757	5.8718	-0.5661	-0.0929	-0.1138	-0.7131	-0.706	1.5482	99.7848	3.429	0.1949	6.4297	12.8642	5.9658
S016WTS001	Codilean et al. 2022	442.825		7.5176	7.3621	0.5554	0.7756	0.9704	4.6831	5.5491	5.7236	103.03	148.749	199.985	6.1639	6.5911	6.9144	0.3541	0.5648	0.6901	5.0525	4.4363	3.5874	-0.0188	0.855	11.8587	0.39	-1.8832	0.0764	0.2679	1.4313	6.8678	7.2611	4.0213	5.1743	7.048	5.6467	-0.3007	-0.3072	-0.2646	-0.8739	-0.8526	1.7955	39.0043	5.742	2.4611	6.3755	12.1627	6.0599
S086WTS021	Codilean et al. 2022	142.389		8.6523	7.404	0.56962	0.7582	0.9595	4.8504	5.5961	5.8313	112.532	159.416	222.426	6.396	6.7248	7.593	0.3583	0.5654	0.7161	5.0481	4.6049	3.8497	-0.4929	7.206	12.8955	0.43	-1.9498	0.1015	0.2647	1.4106	6.3756	7.2047	4.1138	5.3772	7.0964	5.8048	-0.6451	-0.1753	-0.1958	-0.7886	-0.7842	1.5105	99.374	3.011	0.096	6.4157	12.7165	6.0005
S045WTS009	Codilean et al. 2022	521.169		7.3547	7.3705	0.562	0.7918	0.9528	4.5646	5.4806	5.6471	101.77	145.945	186.568	5.5003	6.0019	6.3845	0.3692	0.5851	0.6867	6.7807	4.166	3.4243	-0.2275	21.295	32.8761	0.7058	-2.1813	0.2433	0.2815	1.449	6.6176	6.564	3.85	4.6548	6.8857	5.1435	-0.6226	-0.8428	-0.1275	-1.2553	-0.7689	1.3215	8.0288	9.451	0	4.7317	11.5454	5.8101
S026WTS002	Codilean et al. 2022	56946.2		2.661	7.1117	0.05139	0.0985	0.1642	2.6658	4.6755	4.7157	8.8243	14.8958	20.7854	3.202	3.5396	3.8153	0.0277	0.0501	0.0852	7.4705	4.7445	4.1068	-0.0183	71.459	29.7079	0.9283	-3.1559	0.5478	0.2873	1.4749	7.0691	7.0949	2.967	3.9575	6.3318	4.7207	0.786	-1.803	-1.7562	-2.1278	-2.1046	0.2542	28.7222	4.949	1.7543	4.1049	9.2103	5.1079
S182WTS026	Codilean et al. 2022	7321		4.7123	7.4788	0.33749	0.5182	0.6217	3.9141	5.0608	5.1353	49.3354	70.1653	87.0678	4.6491	4.9828	5.164	0.1787	0.276	0.332	7.4463	4.7383	4.2794	-0.0907	55.526	95.9112	1.2931	-2.4998	0.6185	0.3056	1.4684	7.1243	7.1643	3.3088	4.3137	6.3304	4.7322	0.9747	-0.9486	-0.4104	-1.3303	-1.0832	1.2204	0	6.057	0	2.3026	9.2103	4.6052
S156WTS013	Codilean et al. 2022	91254.2		2.1894	7.2476	0.09229	0.1809	0.3284	2.8908	4.7333	4.8806	18.496	38.4	60.7815	3.6184	3.8943	4.4759	0.0418	0.0665	0.1794	7.7576	4.9781	4.2665	0.1063	90.039	80.3552	1.202	-3.4451	0.6113	0.2546	1.3984	7.3413	7.343	3.5564	4.2056	6.7269	4.8322	1.2593	-1.2892	-1.1832	-1.8767	-1.8018	0.5262	100	2	0	2.3026	9.2103	4.6052
S186WTS009	Codilean et al. 2022	128129		1.85	7.1036	0.07781	0.1724	0.3315	2.8465	4.7354	4.7869	16.6767	31.4277	40.1467	3.358	3.7238	3.887	0.052	0.1166	0.204	7.3326	4.6525	4.0767	-0.0533	73.382	39.5228	0.867	-3.1512	0.5455	0.2842	1.4533	7.02	7.0527	2.9076	4.0239	6.2892	4.7882	0.7172	-1.8978	-1.8407	-2.1456	-2.1203	0.2265	13.4649	7.088	3.683	4.2806	9.2103	5.1683
S082WTS035	Codilean et al. 2022	6411.49		4.845	7.4352	0.17923	0.4227	0.6087	3.6608	5.0269	5.2294	33.8848	63.744	98.7956	4.0482	4.6982	5.1013	0.0965	0.2059	0.3373	7.4179	4.6408	4.2191	-1.0798	42.906	35.7815	1.1311	-2.4639	0.5608	0.2612	1.2837	6.2418	6.9917	1.8507	2.9537	5.3553	3.6292	-0.0778	-0.3466	-0.2971	-0.9747	-0.8931	1.0371	7.241	8.739	2.979	3.0543	9.2103	4.624
S220WTS004	Codilean et al. 2022	2725.42		5.7004	7.0639	0.26096	0.3847	0.4731	3.7693	5.0681	5.1946	44.7279	65.2797	86.0598	4.782	5.3222	5.7466	0.17	0.2563	0.3124	8.1229	4.8901	3.8748	0.1862	99.079	89.2859	1.5241	-3.6889	0.6919	0.1893	1.2787	7.3511	7.3753	3.7831	4.6546	7.0841	5.4143	1.5581	-0.0508	-0.0166	-0.7089	-0.6816	1.7242	5.6088	6.873	1.397	5.7549	9.2103	4.6433
S094WTS017	Codilean et al. 2022	4992.34		5.0952	7.22	0.47812	0.7109	0.8588	4.7552	5.4865	5.6254	99.6373	140.201	184.101	5.5393	6.0007	6.1904	0.3492	0.5219	0.6222	8.2227	4.8515	3.9405	-0.5254	2.34	8.0621	0.675	-1.3863	0.1484	0.1942	1.2317	6.6352	6.8019	3.6434	4.2128	6.8268	4.8626	-0.893	-0.0909	-0.1037	-0.7859	-0.7985	1.3787	70.9765	5.753	2.944	7.669	11.8968	5.8549
S071WTS013	Codilean et al. 2022	15010.1		3.9943	7.2885	0.31982	0.5141	0.6233	3.9517	5.119	5.2361	50.37	73.6486	95.1355	4.5977	4.9643	5.4064	0.1888	0.2964	0.3642	6.0703	4.0704	3.5024	-0.4021	4.481	1.5457	0.5464	-1.8945	0.3038	0.2822	1.5173	6.5304	6.6746	2.9706	3.9623	6.2015	4.5763	-0.5031	-0.9676	-0.6679	-1.3688	-1.2063	0.6296	8.0861	6.702	0.9661	4.1491	9.2103	5.7887
S230WTS012	Codilean et al. 2022	985.691		6.7175	7.0837	0.52817	0.7796	0.9287	4.7752	5.5702	5.6892	113.92	158.598	200.107	5.6596	6.1721	6.3147	0.4161	0.6011	0.6894	4.749	4.1964	3.4373	-0.4138	0.08	1.383	0.4118	-1.4671	0.1387	0.1991	1.2211	6.5118	6.4496	3.1264	4.4483	6.4866	5.2008	-1.1354	-0.5137	-0.5246	-1.08	-1.0903	1.7668	7.9464	5.725	0.5238	6.2176	12.0584	6.0041
S188WTS027	Codilean et al. 2022	35492.2		3.1338	7.6011	0.30526	0.5577	0.7071	4.5213	5.4511	5.7105	68.3972	101.746	150.986	5.2224	5.6608	6.3361	0.2084	0.3371	0.4521	5.4553	4.267	3.8067	-1.0954	2.629	6.7194	0.5014	-2.0628	0.3103	0.2126	1.2386	6.01	6.0236	1.7613	3.2777	5.2327	3.7544	-1.5729	-0.1681	-0.1468	-0.7077	-0.6826	1.5908	72.8189	5.47	3.0512	2.3026	9.2103	4.6052
S057WTS001	Codilean et al. 2022	2155.02		5.9353	6.8795	0.52544	0.8393	1.0632	4.6112	5.4702	5.585	108.848	159.484	207.881	5.2649	5.7158	5.8199	0.4059	0.6465	0.7766	6.7172	4.396	3.5532	0.4851	20.616	29.3529	0.7297	-1.788	0.2559	0.2542	1.3692	7.2921	7.1246	2.8577	3.6048	6.4176	4.5939	0.4343	-1.0076	-1.0048	-1.5078	-1.506	0.6853	60.7483	5.436	3.6001	6.5876	10.5073	5.9222
S009WTS027	Codilean et al. 2022	38990.4		3.0397	6.6781	0.03723	0.1268	0.2066	2.6725	4.6761	4.7128	10.1311	17.4537	22.5948	2.8395	2.9914	3.1483	0.0387	0.0756	0.1124	6.6219	4.3074	3.568	0.0262	16.601	33.1957	1.1434	-2.2073	0.6268	0.2828	1.4997	6.852	6.8965	2.3154	2.8324	6.1244	4.0805	0.8558	-1.6745	-1.6195	-1.9914	-1.9562	0.4296	0	10.916	4.3735	2.3026	9.2103	4.6052
S123WTS006	Codilean et al. 2022	43253.7		2.936	7.4717	0.33353	0.5461	0.6759	4.6718	5.499	5.7393	72.2455	108.702	157.181	5.4679	5.7869	6.1699	0.2151	0.3415	0.4416	5.0009	4.0201	3.4496	-0.9168	0.268	3.6915	0.2859	-1.5422	0.234	0.2238	1.2913	6.2682	6.2481	2.3409	3.6641	5.6217	4.1656	-1.4432	0.104	0.1343	-0.4912	-0.4582	1.6382	64.1666	4.214	2.6021	2.3026	9.2103	4.6052
S123WTS005	Codilean et al. 2022	20041.8		3.7052	7.4717	0.33353	0.5461	0.6759	4.6718	5.499	5.7393	72.2455	108.702	157.181	5.4679	5.7869	6.1699	0.2151	0.3415	0.4416	5.0009	4.0201	3.4496	-0.9168	0.268	3.6915	0.2859	-1.5422	0.234	0.2238	1.2913	6.2682	6.2481	2.3409	3.6641	5.6217	4.1656	-1.4432	0.104	0.1343	-0.4912	-0.4582	1.6382	64.1666	4.214	2.6021	2.3026	9.2103	4.6052
S104WTS023	Codilean et al. 2022	1741.87		6.1481	7.2006	0.4864	0.6954	0.8447	4.6277	5.4087	5.4771	93.7496	127.395	157.16	5.4255	5.7827	5.9017	0.3295	0.4697	0.5554	6.8276	4.8409	4.2291	-0.0092	43.194	47.6458	0.9484	-2.427	0.4805	0.2095	1.3209	7.1782	7.2801	4.1014	5.0842	7.261	5.7055	0.7764	-0.1987	-0.2713	-0.8217	-0.8713	1.609	84.6574	4.015	0	5.3773	9.2937	5.3135
S023WTS023	Codilean et al. 2022	6112.36		4.8928	7.0828	0.05937	0.0775	0.1284	2.9004	4.7084	4.7364	8.3009	11.4159	15.2389	2.8645	3.0363	3.2791	0.0256	0.0381	0.0519	5.8661	3.8671	3.2571	-1.3798	0.012	0	0.2084	-2.21	0.1531	0.1685	1.0969	5.9057	5.9544	-0.3285	0.9482	4.7652	2.7187	-2.2589	-1.5765	-1.3661	-1.9711	-1.8407	0.4887	0	5.891	0	3.5459	9.2103	5.2627
S069WTS021	Codilean et al. 2022	2613.7		5.7423	6.7317	0.42959	0.658	0.8107	4.3459	5.2827	5.3616	77.8922	110.42	138.921	5.1473	5.5372	5.6531	0.3008	0.4498	0.5425	7.1454	4.5048	3.741	0.0028	62.605	47.6279	1.119	-2.501	0.443	0.2823	1.4414	6.7499	7.0146	2.8607	3.6939	6.5325	4.7958	0.46	-1.0379	-0.9652	-1.5191	-1.4602	0.7618	55.6552	7.169	3.7627	5.1161	9.2877	5.6421
S143WTS024	Codilean et al. 2022	1256.4		6.4748	6.8069	0.22778	0.3637	0.5047	3.8884	5.0607	5.1229	42.5984	61.2172	77.316	4.6489	5.0831	5.1307	0.1635	0.2401	0.3139	7.189	4.6533	3.958	0.2447	66.603	54.4226	1.1153	-2.8319	0.5709	0.2698	1.4606	7.151	6.8447	2.8539	3.4581	6.4695	4.5213	0.8322	-0.408	-0.331	-0.8972	-0.843	1.1593	0.2995	11.742	4.5721	4.6026	9.2103	4.8883
S188WTS004	Codilean et al. 2022	39887.4		3.017	7.4276	0.24535	0.4608	0.59	4.4299	5.3936	5.5988	57.0752	86.9223	136.494	4.6774	5.0087	5.4921	0.1575	0.255	0.3386	5.8913	3.8168	3.2198	-1.4506	0.021	0.3439	0.1602	-1.0984	0.1269	0.1937	1.1722	5.7306	5.5811	0.1689	1.5145	4.7941	2.8094	-2.7013	0.265	0.2776	-0.2758	-0.2618	1.373	69.2634	5.673	3.1052	3.6635	9.2103	4.662
S136WTS011	Codilean et al. 2022	19721.7		3.7213	6.8547	0.20733	0.4214	0.5407	3.3778	4.8752	4.939	29.4993	50.9651	66.3022	3.9226	4.3012	4.4966	0.115	0.2228	0.3018	6.4805	4.3498	3.5459	-0.2134	43.998	41.3261	0.84	-2.3892	0.5023	0.2557	1.3295	6.8126	7.0355	2.8114	3.4801	6.3975	4.5024	0.4678	-1.6124	-1.5901	-1.9973	-1.9798	0.4722	0	8.691	3.4013	5.3188	9.2103	4.752
S071WTS008	Codilean et al. 2022	8054.76		4.6168	7.1657	0.47879	0.6771	0.7895	4.302	5.241	5.3042	78.8001	105.489	135.638	5.0371	5.2884	5.6058	0.2779	0.408	0.4845	5.9109	4.0392	3.4257	-0.2916	19.748	20.3843	0.5384	-1.9505	0.2951	0.2665	1.5028	6.5676	6.7335	2.972	3.8403	6.2949	4.5695	-0.391	-0.5708	-0.1785	-1.0654	-0.9036	0.8388	9.8574	7.952	3.8014	4.3877	9.2103	5.8144
S021WTS017	Codilean et al. 2022	19260.2		3.745	7.4948	0.21971	0.3617	0.4862	3.754	5.0719	5.1778	38.8827	62.6171	83.9354	4.7387	5.3229	5.6965	0.1262	0.2198	0.2861	8.15	5.2013	4.5898	0.5062	81.518	55.3253	1.6188	-2.6971	0.6705	0.2872	1.3209	7.8587	7.7464	4.1329	4.9197	7.0355	5.283	2.0645	-1.8282	-1.8521	-2.077	-2.0843	0.0553	90.3203	2.39	0.978	2.3026	9.2103	4.6052
S127WTS031	Codilean et al. 2022	13877.7		4.0728	7.3864	0.25376	0.4702	0.6313	3.9692	5.1451	5.3035	46.2764	74.3461	102.75	4.181	4.6103	5.0456	0.1567	0.2747	0.3797	6.3848	4.4252	4	-0.8487	15.035	5.2136	0.6252	-2.2238	0.3636	0.2333	1.3209	6.4679	6.5234	1.4339	2.5014	5.1765	3.3476	-0.8173	-1.1657	-1.1239	-1.6025	-1.5621	1.0507	0	6.984	0	2.3026	9.2103	4.6052
S165WTS036	Codilean et al. 2022	2298.73		5.8707	6.7923	0.25622	0.4565	0.5929	3.6957	4.9568	5.0212	41.1149	59.4045	75.0963	4.214	4.5354	4.6827	0.1741	0.2634	0.3422	6.949	4.6992	3.9811	0.2366	68.585	71.6467	1.3158	-2.8595	0.5949	0.2591	1.4627	7.2278	6.9439	2.6371	3.2241	6.3001	4.3269	0.9736	-0.4146	-0.2606	-0.9058	-0.7992	1.1258	0	11.467	4.5175	4.4543	9.2103	4.6396
S025WTS018	Codilean et al. 2022	1872.3		6.0759	7.423	0.50306	0.74	0.8815	4.6993	5.5864	5.795	95.7419	135.935	191.629	5.3159	5.8082	6.1618	0.3002	0.4566	0.5509	8.1807	4.7431	4.2368	-0.1316	64.648	63.9506	1.4361	-2.4361	0.4734	0.277	1.4213	7.0879	7.1988	2.238	3.2945	5.5857	3.8996	0.5948	-0.6872	-0.7119	-1.1584	-1.178	1.2076	29.437	4.834	0	5.5335	10.2385	4.7224
S255WTS003	Codilean et al. 2022	6267.5		4.8677	6.831	0.40808	0.683	0.8067	3.9623	5.0828	5.161	63.6934	91.0231	109.492	3.2956	3.4963	3.561	0.2587	0.3984	0.4738	5.4787	4.0636	3.3654	-0.4223	0	7.8562	0.2881	-1.0481	0.1598	0.2144	1.2605	6.0947	5.8115	-1.1616	-0.351	4.6943	2.4641	-1.6341	-0.7298	-0.5266	-1.1482	-0.9686	1.1326	0	10.33	3.8655	4.9295	10.762	5.9661
S207WTS026	Codilean et al. 2022	1935.22		6.0428	6.6777	0.46049	0.7523	0.9341	4.6558	5.4605	5.6293	94.9474	134.03	176.109	5.7777	6.2888	6.5411	0.3541	0.5347	0.622	6.4813	4.6421	3.7062	0.4035	16.269	29.7112	0.8539	-1.8624	0.2028	0.2647	1.3673	7.0089	7.2281	3.7215	4.421	7.3508	5.5254	0.3224	-0.8855	-0.841	-1.3992	-1.3614	0.7812	55.783	4.758	3.0263	7.0284	13.468	5.9992
S256WTS008	Codilean et al. 2022	42531.3		2.9528	7.3847	0.26258	0.4646	0.5928	4.4425	5.403	5.604	57.9464	87.9141	138.866	4.6812	5.0109	5.4932	0.1597	0.2577	0.3403	5.9133	3.8294	3.2359	-1.4307	0.021	0.3542	0.1602	-1.1233	0.1273	0.1937	1.1722	5.7544	5.6049	0.1689	1.5065	4.8012	2.8225	-2.6647	0.2577	0.269	-0.2804	-0.2676	1.373	71.969	5.478	3.082	3.4802	9.2103	4.6617
S188WTS035	Codilean et al. 2022	13633.9		4.0905	7.4507	0.37772	0.6469	0.7689	4.776	5.6112	5.7711	86.1493	133.167	184.963	5.8246	6.3373	6.5778	0.2585	0.436	0.5357	4.8269	4.1138	3.5319	-0.8712	3.776	4.6803	0.5491	-1.7373	0.2431	0.2198	1.2892	6.0913	6.2197	2.9999	4.2372	6.1044	4.6867	-1.409	-0.0177	-0.0342	-0.5739	-0.5897	1.6842	79.4907	4.57	2.1778	2.3026	9.2103	4.6052
S009WTS016	Codilean et al. 2022	9970.64		4.4034	6.5074	0.04376	0.1735	0.2898	3.0037	4.7544	4.8421	15.5268	25.1198	37.771	3.6608	3.9931	4.2872	0.0464	0.0801	0.138	6.9567	4.3506	3.5479	0.2227	41.052	45.1283	1.1961	-2.4013	0.5741	0.2938	1.3811	6.9421	6.8897	2.5109	3.1074	6.4041	4.4455	0.8623	-0.9091	-0.8778	-1.4184	-1.4036	0.6569	0	9.397	3.83	4.541	9.2103	5.2909
S082WTS019	Codilean et al. 2022	9960.88		4.4044	7.1603	0.31325	0.5258	0.6435	4.5062	5.3654	5.5982	68.1433	101.857	137.253	5.1836	5.7105	5.7711	0.2207	0.3681	0.4608	6.609	4.1798	3.57	-1.7454	0.075	0.0207	0.1998	-1.215	0.1329	0.2333	1.2673	5.4722	5.7661	1.9774	3.2028	5.5763	4.0244	-2.7517	-0.5358	-0.5642	-1.0518	-1.068	1.0476	88.4475	3.861	1.9346	3.3716	9.2103	5.188
S094WTS009	Codilean et al. 2022	26535.3		3.4246	7.0287	0.39891	0.6123	0.708	4.6992	5.5254	5.6692	81.6489	118.869	161.808	5.2283	5.6072	5.9543	0.2785	0.4351	0.5394	8.1378	4.5478	3.674	-1.3849	0	1.3216	0.2607	-1.471	0.1506	0.1807	1.2184	5.7418	5.7978	1.7445	2.787	5.5083	3.7893	-2.4036	0.3266	0.3362	-0.2734	-0.2621	1.5916	76.4418	5.212	1.7159	6.1255	9.2103	5.5413
S258WTS006	Codilean et al. 2022	3688.5		5.3978	7.359	0.37149	0.586	0.701	4.47	5.3878	5.4955	78.0805	112.84	153.838	5.3783	5.9099	6.0984	0.2357	0.3885	0.4638	7.6032	4.707	4.256	0.3645	57.548	58.4082	1.2082	-2.3634	0.5311	0.2617	1.302	7.4938	7.623	3.9622	4.3283	6.9968	4.8492	1.4872	-0.352	-0.3311	-0.9076	-0.887	1.2315	81.4823	3.544	2.9379	2.3026	9.2103	4.6052
S164WTS069	Codilean et al. 2022	45601.6		2.8831	7.3211	0.20424	0.4366	0.5519	3.5001	4.9043	4.9858	32.842	55.2884	77.5696	3.4995	3.7745	4.0985	0.124	0.2286	0.3212	7.0617	4.7146	4.3753	-0.797	24.167	60.9865	1.0519	-2.2818	0.5509	0.2141	1.4255	6.6623	6.8104	0.9247	2.0057	5.005	3.088	-0.0435	-1.2666	-1.2556	-1.731	-1.7193	0.1132	100	2	0	2.3026	9.2103	4.6052
S082WTS003	Codilean et al. 2022	1460.73		6.3241	7.1753	0.32015	0.5542	0.6987	4.2108	5.23	5.4405	56.1412	88.146	117.118	4.9942	5.5042	5.706	0.1939	0.3362	0.4124	7.5464	4.7543	4.3831	-0.7037	63.448	68.4427	1.2412	-2.517	0.597	0.2555	1.3119	6.5933	6.9569	2.2145	3.2527	5.7209	4.054	0.2735	-0.3118	-0.3895	-0.9329	-0.9787	1.0777	13.1148	7.839	1.6038	3.6025	9.2103	4.6557
S082WTS023	Codilean et al. 2022	21941.3		3.6147	7.1396	0.27169	0.4816	0.5927	4.2396	5.2551	5.4382	56.2145	86.0352	118.069	5.0736	5.5314	5.9408	0.1811	0.3188	0.4031	6.5376	4.1281	3.5645	-1.7962	0.025	0	0.1552	-1.2581	0.1364	0.2291	1.2235	5.4286	5.8288	2.4047	3.4114	5.8765	4.2151	-2.7276	-0.3006	-0.3452	-0.8654	-0.8768	1.0558	97.3244	3.072	1.3004	2.8611	9.2103	5.0119
S273WTS008	Codilean et al. 2022	212214		1.3455	7.1165	0.04108	0.0665	0.09	2.746	4.6748	4.6904	7.0849	9.6926	12.1532	2.6533	2.7642	2.9192	0.0255	0.0381	0.0498	6.5198	4.4057	3.8908	-0.6716	0.723	0.0905	0.665	-2.2046	0.378	0.2315	1.2616	6.6827	6.6132	0.7256	1.5722	5.0019	2.9628	-0.5677	-2.1422	-2.1153	-2.2377	-2.2256	0.1861	28.9532	5.842	0	2.3026	9.2103	4.6052
S025WTS017	Codilean et al. 2022	2883.58		5.644	7.2783	0.49546	0.7369	0.8815	4.8139	5.6271	5.8601	101.479	147.647	215.528	5.5097	6.0649	6.1925	0.3024	0.4762	0.5689	7.9282	4.6655	4.1391	-0.1469	52.701	50.311	1.0237	-2.386	0.4329	0.2737	1.423	7.0483	7.2604	2.3124	3.3086	5.7223	4.021	0.5304	-0.696	-0.704	-1.1533	-1.1603	1.2133	14.3145	5.664	0	6.1887	10.3927	4.7553
S129WTS001	Codilean et al. 2022	20767.1		3.6697	7.0841	0.24617	0.4787	0.6338	4.2172	5.2688	5.3592	51.7926	82.2257	117.743	4.0866	4.4933	4.6236	0.1667	0.2741	0.3709	6.8639	4.6799	4.3587	-1.0874	22.268	1.6762	0.7281	-2.21	0.421	0.1919	1.3276	6.3187	6.1907	0.1319	1.1145	4.8489	2.7782	-1.1349	-0.2234	-0.303	-0.8194	-0.8576	1.0633	98.7787	2.122	0.7981	3.3493	9.2103	4.8024
S164WTS068	Codilean et al. 2022	31819.6		3.243	7.2873	0.10199	0.2406	0.437	3.2946	4.8647	4.9837	23.8197	44.4032	67.7404	3.6021	4.1827	4.461	0.0659	0.1359	0.2446	7.2524	4.6306	4.2051	-0.6933	10.109	24.0251	1.1067	-2.0333	0.4679	0.2295	1.3179	6.796	6.8864	1.5382	2.7473	5.2673	3.5801	-0.1156	-1.0095	-0.9465	-1.5367	-1.4806	0.0858	100	2	0	2.3026	9.2103	4.6052
S188WTS020	Codilean et al. 2022	20894.9		3.6636	7.2858	0.35211	0.6097	0.7346	4.7208	5.5396	5.6998	80.5216	120.507	172.066	5.6058	6.1272	6.4146	0.2437	0.3854	0.4885	4.6156	4.0791	3.4034	-0.9927	1.365	0.2944	0.3635	-1.8055	0.1662	0.2243	1.2935	6.0553	5.8982	2.1398	3.4947	5.6049	4.1703	-1.9779	0.0981	0.108	-0.4855	-0.4716	1.8349	83.1089	4.212	2.7553	3.8618	9.2103	4.6122
S009WTS066	Codilean et al. 2022	37108.4		3.0892	6.4824	0.0967	0.1934	0.2775	3.1336	4.8181	4.8862	17.5179	29.779	39.8097	3.4187	3.9661	4.1283	0.0537	0.1027	0.1544	6.471	4.3237	3.6018	-0.1112	23.894	35.7032	1.1923	-2.3056	0.6483	0.2685	1.4338	6.791	6.9326	1.9155	2.3627	5.9504	3.8393	0.838	-1.2208	-1.1852	-1.7254	-1.7021	0.5151	56.3351	5.649	3.2958	4.2087	9.2103	4.6123
S188WTS033	Codilean et al. 2022	12548.5		4.1735	7.2568	0.39209	0.6703	0.7813	4.7801	5.6242	5.7244	89.4209	136.894	192.431	5.7445	6.286	6.5087	0.2689	0.4545	0.5451	4.8993	4.1423	3.5698	-1.0199	12.722	6.9944	0.4716	-1.947	0.2596	0.2157	1.2444	5.994	5.9565	2.4891	3.5733	5.8589	4.2604	-1.7051	-0.0679	-0.0582	-0.6156	-0.611	1.6382	48.0141	5.877	2.5313	2.3026	9.2103	4.6052
S102WTS015	Codilean et al. 2022	25112.5		3.4797	6.8941	0.13699	0.2623	0.4003	3.1789	4.7907	4.8438	19.1243	28.8136	42.1326	3.4296	3.7472	3.899	0.076	0.1304	0.1913	5.5731	3.9211	3.4527	-0.5639	0	0.2452	0.1744	-1.4053	0.1042	0.2185	1.2903	6.2346	6.3206	1.4704	2.5005	5.4209	3.6649	-1.4504	-0.9145	-0.5791	-1.3352	-1.0747	1.0911	0	12	4.6065	4.4959	10.7196	6.0016
S283WTS025	Codilean et al. 2022	484.509		7.4277	6.4727	0.48896	0.8036	1.0302	4.9061	5.6465	5.7577	105.117	152.679	214.115	6.0145	6.4949	6.6199	0.3945	0.6071	0.7285	6.0566	4.6409	3.7244	-0.0058	11.298	29.2143	0.5786	-1.8183	0.1217	0.2414	1.3288	6.6457	6.7913	3.2756	3.9894	7.1041	5.285	-0.5756	-0.8039	-0.7846	-1.3205	-1.3071	0.9047	56.4707	4.554	2.8296	6.865	12.8436	6.0343
S283WTS026	Codilean et al. 2022	495.133		7.406	6.4727	0.48896	0.8036	1.0302	4.9061	5.6465	5.7577	105.117	152.679	214.115	6.0145	6.4949	6.6199	0.3945	0.6071	0.7285	6.0566	4.6409	3.7244	-0.0058	11.298	29.2143	0.5786	-1.8183	0.1217	0.2414	1.3288	6.6457	6.7913	3.2756	3.9894	7.1041	5.285	-0.5756	-0.8039	-0.7846	-1.3205	-1.3071	0.9047	56.4707	4.554	2.8296	6.865	12.8436	6.0343
S164WTS052	Codilean et al. 2022	44505.7		2.9074	7.2332	0.234	0.46	0.6146	4.0213	5.2479	5.4747	45.9973	81.0162	117.101	5.0911	5.8648	6.3006	0.146	0.2781	0.3941	7.9992	4.9608	4.5906	0.1152	47.314	61.5239	1.4626	-2.3881	0.6175	0.2595	1.4614	7.4972	7.3662	2.4632	3.9338	5.8561	4.5971	1.3022	-1.2137	-1.2056	-1.7243	-1.7181	0.5343	99.9883	2.001	0.0116	2.3026	9.2103	4.6052
S078WTS003	Codilean et al. 2022	148164		1.7047	7.1788	0.05956	0.1432	0.2765	2.9772	4.7601	4.8567	14.6887	26.9751	45.0213	3.3737	3.7888	4.1889	0.037	0.0693	0.1414	6.5346	4.2354	3.9353	-0.7142	0.129	2.9413	0.3612	-1.7181	0.2195	0.2467	1.3318	6.5005	6.4534	1.4761	2.7094	5.2863	3.6261	-1.1505	-0.5766	-0.3923	-1.0407	-0.8609	1.0892	0.2148	10.77	0.2888	4.5605	9.3941	4.629
S116WTS002	Codilean et al. 2022	279075		1.0716	6.8807	0.12241	0.2673	0.3984	3.386	4.8502	4.9273	22.3064	37.596	54.467	3.418	3.5759	3.9472	0.0768	0.1376	0.2257	6.3718	4.304	3.6449	-1.0724	33.819	0.0087	0.4089	-2.4057	0.2394	0.2012	1.2056	6.2853	6.1846	0.7561	1.3226	5.0896	2.9465	-1.6022	-2.1413	-2.1439	-2.25	-2.2528	0.5312	0	5.657	0	2.3026	9.2103	4.6052
S009WTS051	Codilean et al. 2022	27055.1		3.4052	6.4988	0.1437	0.2639	0.353	3.5547	4.9347	5.0293	26.5865	42.9865	58.7672	3.8692	4.3166	4.3754	0.0936	0.1606	0.2174	6.5199	4.3713	3.6739	-0.0803	65.088	67.113	1.369	-2.8035	0.6589	0.2804	1.3216	6.7953	6.8843	1.8824	2.3304	5.9156	3.803	0.8478	-1.203	-1.2181	-1.6966	-1.7131	0.5247	87.306	2.66	0	4.4896	9.2103	4.7422
S207WTS019	Codilean et al. 2022	577.861		7.2515	6.4654	0.48825	0.8034	1.0299	4.9073	5.647	5.7586	105.097	152.693	214.065	6.014	6.4958	6.6201	0.3938	0.6068	0.7284	6.0566	4.6409	3.7244	-0.0088	10.839	28.6177	0.5787	-1.8134	0.1206	0.2414	1.3288	6.6423	6.7939	3.2756	3.9894	7.1099	5.291	-0.5786	-0.8108	-0.7846	-1.3269	-1.3071	0.9047	56.8349	4.519	2.8197	6.8748	12.8513	6.037
S164WTS058	Codilean et al. 2022	64674.6		2.5337	7.2189	0.11624	0.2393	0.3891	2.9193	4.7657	4.8945	19.9796	44.0287	62.1759	3.7699	4.0845	5.1123	0.0591	0.1248	0.2383	8.4679	5.2049	4.5922	0.6743	69.124	80.0774	1.5201	-2.577	0.6725	0.2739	1.3963	8.095	8.0775	4.2393	5.5562	7.3738	6.1483	2.4818	-1.5635	-1.5137	-1.9105	-1.876	0.2385	100	2	0	2.3026	9.2103	4.6052
S188WTS009	Codilean et al. 2022	95533.4		2.1436	7.165	0.21155	0.4425	0.6289	4.2735	5.3297	5.517	50.811	88.3293	140.011	4.3401	4.837	4.9638	0.1349	0.2487	0.3766	4.7643	3.7079	3.0602	-1.919	0	0.0113	0.1339	-0.6415	0.0934	0.1965	1.1983	5.2199	5.3388	-0.5361	1.0644	4.7276	2.7327	-3.3535	0.4389	0.4731	-0.2141	-0.1691	1.8449	36.1357	6.987	3.0556	2.3026	9.2103	4.6052
S071WTS014	Codilean et al. 2022	20991.8		3.6589	6.8922	0.31135	0.5089	0.6146	3.905	5.0783	5.2002	48.1264	70.3552	89.7638	4.5155	4.8256	5.1525	0.1835	0.2893	0.3583	6.0779	4.0534	3.5117	-0.3938	2.046	1.6853	0.5709	-1.8534	0.3004	0.2821	1.5146	6.5306	6.6688	2.9706	3.9623	6.5031	4.9099	-0.5106	-0.9263	-0.629	-1.339	-1.1861	0.6484	7.6512	6.859	1.2079	4.2174	9.2103	5.7994
S026WTS013	Codilean et al. 2022	58710.4		2.6304	6.6467	0.08742	0.1737	0.2632	2.7643	4.7158	4.7636	15.1691	27.4502	34.7257	3.312	3.6423	3.9807	0.0529	0.1131	0.16	7.5499	4.6909	4.0469	0.0555	73.164	52.1045	1.0244	-3.1653	0.555	0.286	1.5105	7.0972	7.1578	2.6735	3.7595	6.438	4.926	0.915	-1.7934	-1.7556	-2.1153	-2.0988	0.2944	1.3802	5.219	0.8554	4.6593	9.2103	5.272
S102WTS012	Codilean et al. 2022	36641.2		3.1019	6.8124	0.09286	0.1886	0.267	3.076	4.7673	4.7993	15.6544	24.2395	31.0884	3.1019	3.3615	3.4221	0.0535	0.1008	0.1371	6.5077	3.77	3.2303	-0.9036	0	0.0365	0.2432	-1.9065	0.1692	0.2235	1.3023	5.9537	6.1344	0.59	1.9778	5.0505	3.3512	-1.6996	-0.724	-0.3191	-1.1891	-0.8884	0.6659	0.924	7.26	0	3.8348	9.2103	5.914
S094WTS008	Codilean et al. 2022	22788		3.5768	6.917	0.44661	0.6607	0.7607	4.7539	5.5177	5.6381	90.4796	127.604	169.031	4.6407	5.0222	5.1409	0.3213	0.4871	0.5654	7.0162	4.3593	3.6317	-1.5365	0	6.7338	0.203	-1.0915	0.1063	0.1908	1.2266	5.5525	5.3457	0.2776	1.4846	4.9219	3.0101	-3.0224	0.2268	0.2372	-0.3332	-0.3237	1.5017	78.1519	3.913	1.0975	6.3951	9.2773	5.8148
S138WTS008	Codilean et al. 2022	13534.3		4.0978	6.5708	0.36023	0.6023	0.7314	4.1024	5.1687	5.2645	65.5234	99.651	124.125	4.589	4.8149	5.2994	0.2528	0.415	0.5119	7.1548	4.4893	3.7431	-0.1925	49.368	53.0467	1.0637	-2.6824	0.4883	0.2321	1.3329	6.8972	6.8742	2.6842	3.1392	6.5035	4.4246	0.3089	-1.5237	-1.4992	-1.916	-1.8985	0.341	84.5572	3.575	2.0715	5.3321	9.2103	4.8486
S220WTS008	Codilean et al. 2022	8351.1		4.5807	6.5478	0.26118	0.4321	0.558	3.5373	4.9928	5.0734	38.363	58.1594	76.6412	4.5521	5.0661	5.3416	0.1501	0.2354	0.3055	7.7641	4.7251	3.7359	0.316	98.791	86.4862	1.5243	-3.5972	0.7269	0.2251	1.3149	7.4212	7.4311	3.4032	4.2526	7.1615	5.4738	1.7961	-0.2624	-0.2797	-1.1644	-1.2073	1.2522	1.3542	6.957	0.1966	2.3026	9.2103	4.6052
S061WTS013	Codilean et al. 2022	30996.6		3.2692	7.1048	0.28064	0.4668	0.5908	3.93	5.0957	5.2079	47.1005	71.3646	94.9689	4.3393	4.652	5.2079	0.1626	0.27	0.3472	6.3918	4.1942	3.7477	-0.829	0.301	0	0.3388	-1.7603	0.2195	0.2432	1.3398	6.487	6.6247	1.5522	2.9601	5.3605	3.87	-1.0911	-0.8713	-0.9036	-1.3712	-1.3855	1.2044	0	8.459	0	2.3026	9.2103	4.6052
S048WTS005	Codilean et al. 2022	71545.2		2.4327	7.1155	0.15433	0.2864	0.4481	3.7668	4.9969	5.0803	34.0631	52.5096	73.3134	3.6648	4.0308	4.319	0.1034	0.1773	0.2615	6.1111	3.8734	3.2956	-1.2538	0	0.8962	0.12	-1.4338	0.1139	0.2371	1.3409	5.9361	5.7287	-0.8604	0.931	4.6986	2.7028	-2.4586	0.1562	0.2098	-0.3916	-0.317	1.2118	17.9496	7.712	3.8491	4.0811	9.2103	4.6925
S256WTS011	Codilean et al. 2022	7586.11		4.6767	7.1375	0.18252	0.3728	0.5156	4.0861	5.2135	5.3972	44.9132	78.1315	115.613	4.5315	5.0864	5.2152	0.1175	0.2195	0.3283	4.881	3.7766	3.156	-1.7848	0	0	0.1781	-0.6008	0.068	0.1983	1.2769	5.354	5.4243	0.2461	1.5782	4.8635	2.9564	-3.2441	0.3857	0.4346	-0.2891	-0.2163	1.7888	14.5729	9.046	4.1899	2.3026	9.2103	4.6052
S069WTS023	Codilean et al. 2022	1215.72		6.5077	5.8941	0.50262	0.738	0.8931	4.5974	5.4265	5.4755	97.0029	132.024	165.831	5.4935	5.9419	6.0438	0.3782	0.5499	0.6333	6.8316	4.5895	3.8083	-0.3688	41.699	54.3205	0.9557	-2.2424	0.3458	0.2687	1.3799	6.3352	7.1194	2.6023	3.4863	6.9269	5.2619	0.0133	-0.9872	-0.9657	-1.471	-1.4559	0.7436	84.4945	4.255	2.7956	5.6411	9.6665	5.7871
S224WTS001	Codilean et al. 2022	4621.97		5.1722	6.2611	0.34554	0.5304	0.6282	3.9072	5.0373	5.0905	50.222	70.6907	86.5431	4.4819	4.7371	4.9502	0.1918	0.2906	0.3537	7.2235	4.504	3.6926	-0.5263	87.976	60.76	1.0567	-3.5579	0.5195	0.1824	1.2823	6.7768	6.6591	1.9629	3.1242	6.1306	4.6488	-0.0487	-0.416	-0.3534	-0.9373	-0.8807	1.3778	55.7757	4.285	0.7566	2.3026	9.2103	4.6052
S283WTS034	Codilean et al. 2022	554.758		7.2923	5.8911	0.47863	0.8114	1.0426	4.9022	5.6516	5.7933	103.879	150.573	209.109	6.0495	6.5162	6.637	0.3855	0.6066	0.735	6.0903	4.66	3.7464	-0.0131	9.36	23.9283	0.5592	-1.9331	0.1021	0.2364	1.3459	6.6162	6.7184	2.7727	3.4906	7.084	5.2682	-0.6948	-0.7945	-0.7961	-1.3053	-1.3071	0.9049	51.1535	4.912	2.9308	6.9344	13.1132	6.0512
S283WTS036	Codilean et al. 2022	495.332		7.4056	5.8911	0.47863	0.8114	1.0426	4.9022	5.6516	5.7933	103.879	150.573	209.109	6.0495	6.5162	6.637	0.3855	0.6066	0.735	6.0903	4.66	3.7464	-0.0131	9.36	23.9283	0.5592	-1.9331	0.1021	0.2364	1.3459	6.6162	6.7184	2.7727	3.4906	7.084	5.2682	-0.6948	-0.7945	-0.7961	-1.3053	-1.3071	0.9049	51.1535	4.912	2.9308	6.9344	13.1132	6.0512
S283WTS035	Codilean et al. 2022	407.701		7.6003	5.8911	0.47863	0.8114	1.0426	4.9022	5.6516	5.7933	103.879	150.573	209.109	6.0495	6.5162	6.637	0.3855	0.6066	0.735	6.0903	4.66	3.7464	-0.0131	9.36	23.9283	0.5592	-1.9331	0.1021	0.2364	1.3459	6.6162	6.7184	2.7727	3.4906	7.084	5.2682	-0.6948	-0.7945	-0.7961	-1.3053	-1.3071	0.9049	51.1535	4.912	2.9308	6.9344	13.1132	6.0512
S123WTS004	Codilean et al. 2022	81408.6		2.3036	7.1252	0.22506	0.4422	0.6305	4.2563	5.3083	5.5087	50.2971	88.0667	138.179	4.3221	4.8119	4.9631	0.1342	0.2464	0.3751	4.768	3.7124	3.0662	-1.9059	0	0.0116	0.1339	-0.647	0.0936	0.1965	1.1983	5.2336	5.3462	-0.5361	1.0644	4.7319	2.7458	-3.3367	0.4367	0.4744	-0.2149	-0.1651	1.8353	35.9651	7.006	3.0492	2.3026	9.2103	4.6052
S037WTS005	Codilean et al. 2022	3909.89		5.3396	6.3631	0.2428	0.4118	0.5471	3.503	4.895	4.9962	33.9387	50.2113	77.7117	4.2269	4.5225	4.7519	0.1385	0.2076	0.3139	7.0525	4.4194	3.5429	0.4536	62.971	54.0897	1.2413	-2.849	0.593	0.283	1.4448	7.2472	7.3203	2.9644	3.3878	6.9067	4.8105	1.4569	-1.1233	-1.0101	-1.5818	-1.5055	0.6293	0	8.252	3.266	5.1844	9.2103	5.428
S021WTS016	Codilean et al. 2022	40024.6		3.0136	7.1779	0.14491	0.3435	0.4704	3.7282	5.0526	5.2157	37.3441	60.3774	82.9312	4.7424	5.3307	5.6918	0.1199	0.2104	0.2768	8.142	5.2171	4.5944	0.5501	80.302	63.2847	1.6188	-2.6838	0.672	0.2849	1.3012	7.894	7.7847	3.8671	4.6266	7.0644	5.2871	2.1347	-1.8257	-1.8464	-2.0762	-2.0818	0.055	91.9023	2.271	0.3797	2.3026	9.2103	4.6052
S037WTS026	Codilean et al. 2022	716.957		7.0358	6.3463	0.56455	0.8306	1.0126	4.705	5.5111	5.6226	108.478	153.686	196.678	5.8404	6.1969	6.497	0.4174	0.6273	0.7244	6.5737	4.663	3.7096	0.7787	22.687	32.8449	0.7396	-1.8389	0.23	0.258	1.3685	7.3823	7.4226	3.3779	3.991	7.2993	5.3899	0.8461	-1.1065	-1.0835	-1.5847	-1.5649	0.7193	78.2965	3.478	2.5294	6.7598	11.2455	5.9608
S037WTS027	Codilean et al. 2022	494.358		7.4076	6.3463	0.56455	0.8306	1.0126	4.705	5.5111	5.6226	108.478	153.686	196.678	5.8404	6.1969	6.497	0.4174	0.6273	0.7244	6.5737	4.663	3.7096	0.7787	22.687	32.8449	0.7396	-1.8389	0.23	0.258	1.3685	7.3823	7.4226	3.3779	3.991	7.2993	5.3899	0.8461	-1.1065	-1.0835	-1.5847	-1.5649	0.7193	78.2965	3.478	2.5294	6.7598	11.2455	5.9608
S026WTS010	Codilean et al. 2022	42200.9		2.9606	6.5734	0.10538	0.1916	0.2551	2.8889	4.7264	4.7706	11.979	18.2197	23.9623	3.5355	3.902	4.321	0.0449	0.0729	0.0949	7.0451	4.5277	3.9326	0.122	82.508	73.1683	1.0428	-3.4868	0.5603	0.2905	1.4732	7.0919	7.1178	3.0121	4.2347	6.7867	5.4351	0.9452	-1.9936	-1.9661	-2.1751	-2.162	0.1904	0	6.689	0	5.0113	9.2103	5.4254
S207WTS006	Codilean et al. 2022	361.192		7.7214	6.3596	0.49023	0.7825	0.9637	4.7585	5.4967	5.6521	100.344	139.699	184.414	5.7663	6.0659	6.5072	0.3874	0.5856	0.6903	6.2856	4.417	3.4508	0.5796	23.917	35.6958	0.7779	-1.8754	0.2424	0.256	1.3756	7.2749	6.9395	2.9233	3.717	6.8725	5.1195	0.3124	-0.7129	-0.6685	-1.2355	-1.206	0.8143	39.9589	6.869	3.6388	6.6752	11.9243	5.9619
S182WTS032	Codilean et al. 2022	8185.84		4.6007	6.9382	0.32318	0.5023	0.605	3.8937	5.0522	5.111	47.3584	68.1462	84.8431	4.6962	5.1353	5.2393	0.1688	0.2564	0.3154	7.4408	4.7434	4.2622	-0.1122	54.316	96.1204	1.3017	-2.4877	0.617	0.2948	1.4073	7.1009	7.1673	2.7927	3.7969	6.3194	4.7195	0.9569	-0.9475	-0.3883	-1.328	-1.0579	0.9955	0	6.185	0	2.3026	9.2103	4.6052
S135WTS006	Codilean et al. 2022	8295.84		4.5873	7.119	0.30274	0.4872	0.6568	4.5512	5.3656	5.4351	69.2576	102.411	135.732	5.4804	5.9432	6.1616	0.2175	0.3216	0.4161	7.7692	4.7477	4.0768	0.3917	67.014	34.7079	1.0559	-2.6339	0.5339	0.2475	1.2783	7.4803	7.5091	4.0688	4.5467	7.3012	5.2632	1.4176	-0.1599	-0.184	-0.7238	-0.7411	1.44	0	7	0	2.3026	9.2103	4.6052
S127WTS042	Codilean et al. 2022	1155.59		6.5585	7.0082	0.24094	0.4653	0.6226	3.7336	5.0326	5.1108	40.9504	69.9642	88.7124	3.3032	3.7461	3.8733	0.14	0.2577	0.342	7.442	4.8584	4.4406	-0.5863	34.7	86.1326	1.6939	-2.4169	0.7383	0.2044	1.2701	6.7939	6.6184	-0.2357	0.7613	4.791	2.6797	0.441	0.1558	0.1802	-0.5264	-0.5035	1.0494	0	8.893	0	2.3026	9.2103	4.6052
S188WTS010	Codilean et al. 2022	55284.9		2.6906	7.0427	0.32149	0.5701	0.6593	4.5987	5.4367	5.5139	73.2456	111.441	142.957	4.6392	5.0172	5.0964	0.2177	0.3604	0.4369	5.0572	3.6841	3.0278	-1.6328	0	0.0598	0.2258	-0.8809	0.1215	0.2018	1.2358	5.5595	5.4777	-0.1222	1.1174	4.8056	2.794	-2.943	0.4177	0.4306	-0.2395	-0.2209	1.842	62.6237	4.551	2.1955	2.3026	9.2103	4.6052
S070WTS012	Codilean et al. 2022	4900.48		5.1137	6.5696	0.4345	0.667	0.7466	4.4727	5.3106	5.3821	75.1015	102.781	127.997	4.4845	4.7825	4.9786	0.2712	0.3985	0.465	5.6747	4.0132	3.3168	-0.6862	3.607	18.1972	0.3918	-1.7976	0.1982	0.2098	1.3104	6.1963	6.0679	0.48	1.8071	5.0896	3.3807	-1.5153	-0.6321	-0.3132	-1.0978	-0.9535	1.2267	62.0137	5.583	0	5.1156	9.7255	5.9854
S137WTS014	Codilean et al. 2022	6309.72		4.861	6.4367	0.28135	0.5005	0.596	3.9107	5.1238	5.2273	49.6716	77.986	99.4593	4.486	5.0236	5.3266	0.1793	0.3089	0.3802	7.1189	4.6341	3.9183	-0.2386	57.301	78.739	1.1831	-2.5562	0.5992	0.2559	1.344	6.8333	6.8002	2.2624	2.8252	6.2501	4.2529	0.4994	-1.1917	-1.1286	-1.6939	-1.6492	0.8748	56.4448	5.65	3.1595	5.206	9.2103	4.7901
S069WTS004	Codilean et al. 2022	2370.48		5.84	6.2661	0.44712	0.6787	0.8531	4.3221	5.2824	5.3632	78.9847	112.879	140.201	5.0591	5.3184	5.6297	0.3095	0.4646	0.5685	7.1885	4.4694	3.7006	0.1267	54.545	33.2655	1.0738	-2.3476	0.3992	0.2806	1.4242	6.845	7.0371	2.6132	3.4868	6.6679	4.978	0.4596	-1.0762	-1.012	-1.5512	-1.4992	0.7587	49.1613	7.531	3.8932	5.2802	9.3242	5.7278
S026WTS022	Codilean et al. 2022	20251		3.6949	6.434	0.11692	0.2144	0.3026	3.0579	4.765	4.8016	17.6128	27.5737	36.9147	3.7051	4.0968	4.1852	0.0651	0.1074	0.1542	7.0147	4.6386	4.0304	-0.0001	93.734	64.1952	1.166	-3.8213	0.5574	0.2903	1.4714	6.9116	6.9749	2.2619	3.6224	6.2515	4.9712	0.722	-1.9435	-1.931	-2.1464	-2.1388	0.2235	0	6.764	0	4.8969	9.2103	5.4724
S038WTS019	Codilean et al. 2022	112245		1.9824	6.8983	0.0524	0.073	0.2851	2.8775	4.712	4.7689	13.458	23.0974	47.7702	2.7963	3.0278	3.077	0.0342	0.0596	0.1595	5.9707	4.2281	3.786	-1.3719	1.918	11.1436	0.4251	-1.9988	0.2622	0.1425	1.1416	6.1535	6.225	-0.411	0.8255	4.7782	2.7345	-1.7364	-1.8165	-1.7209	-2.0907	-2.0402	0.2705	63.2944	4.747	2.268	2.3026	9.2103	4.6052
S127WTS016	Codilean et al. 2022	6289.75		4.8641	6.9456	0.28722	0.5054	0.6209	4.0889	5.2135	5.3359	53.5949	85.2988	112.713	4.6946	5.0067	5.2206	0.1705	0.3012	0.3836	6.5401	4.1272	3.5492	-0.7076	1.684	0.0093	0.2941	-1.9668	0.2114	0.247	1.3803	6.5682	6.5159	1.1528	2.5441	5.2338	3.6626	-1.113	-0.9049	-0.8242	-1.3254	-1.2641	1.2058	0.694	7.151	0	2.3026	9.2103	4.6052
S026WTS028	Codilean et al. 2022	37501.2		3.0787	6.4053	0.20034	0.3773	0.4569	3.1641	4.7862	4.8206	22.3802	34.2587	44.0615	4.0151	4.3155	4.4356	0.0852	0.1429	0.1887	7.1306	4.5354	3.915	0.1484	97.33	95.129	1.2312	-4.1105	0.5555	0.29	1.4623	7.0688	7.0954	2.7935	4.1979	6.7224	5.5397	0.9336	-1.9661	-1.9776	-2.1628	-2.1698	0.2049	0	7.634	0	5.1192	9.2103	5.4868
S188WTS040	Codilean et al. 2022	4081.64		5.2966	6.9948	0.44786	0.7114	0.8258	4.9125	5.6812	5.7847	104.372	157.193	209.825	5.876	6.4356	6.5498	0.3262	0.523	0.6204	4.6317	4.1384	3.575	-0.3747	6.924	1.8391	0.358	-2.0341	0.235	0.2361	1.2577	6.6227	6.3312	2.8194	3.7632	6.2989	4.642	-0.9561	-0.071	-0.0941	-0.614	-0.6289	1.6922	82.8496	4.638	2.1612	4.3932	9.3436	4.83
S138WTS016	Codilean et al. 2022	15130		3.9864	6.3712	0.33879	0.5914	0.7228	4.0638	5.1764	5.3104	61.4249	95.7729	125.192	4.7256	5.1567	5.4495	0.2327	0.394	0.4998	7.2449	4.5239	3.7942	-0.2634	67.829	57.9224	1.2646	-2.8285	0.5675	0.2371	1.3736	6.8211	6.9209	2.6452	3.2012	6.6184	4.6341	0.5013	-1.5353	-1.5265	-1.9262	-1.918	0.3884	80.5511	3.641	2.275	5.449	9.2103	4.9123
S139WTS025	Codilean et al. 2022	17898.1		3.8184	6.2528	0.21438	0.3662	0.4406	3.6198	4.9261	4.9891	31.8621	45.9084	58.2755	3.9814	4.1609	4.3236	0.1169	0.1835	0.2262	7.0064	4.5334	3.8631	-0.0285	39.28	66.0265	1.1945	-2.5096	0.6125	0.2688	1.3799	6.9699	6.9892	2.0499	2.4349	6.2049	4.0556	0.8563	-1.2791	-1.2895	-1.755	-1.7579	0.4833	100	2	0	4.0302	9.2103	4.6178
S024WTS007	Codilean et al. 2022	1654.18		6.1998	6.4037	0.2726	0.3997	0.4792	3.7806	5.0515	5.1255	49.0257	69.8528	86.5797	4.6055	4.9113	5.3318	0.1914	0.2853	0.3246	8.3923	4.9469	3.8582	0.3078	99.459	94.0937	1.5532	-3.6009	0.7444	0.2011	1.3536	7.4249	7.4561	3.3399	4.156	7.2183	5.5008	1.8569	-0.0714	-0.0877	-0.8117	-0.811	1.7854	54.0284	4.502	0	4.7423	9.2103	4.6052
S137WTS006	Codilean et al. 2022	3161.59		5.552	6.235	0.27774	0.5236	0.7414	3.7327	5.1048	5.1954	47.7761	83.2447	110.264	4.2341	4.8375	4.9454	0.1953	0.3809	0.5137	6.8527	4.4436	3.66	0.209	45.415	38.9235	1.1464	-2.5133	0.5889	0.2825	1.3919	7.1549	7.2649	2.4229	2.7308	6.526	4.3192	1.2122	-1.0328	-0.9921	-1.5474	-1.511	0.8434	0	9.62	3.4494	5.5119	9.2103	5.0971
S207WTS025	Codilean et al. 2022	619.206		7.1824	6.1851	0.47332	0.745	0.9051	4.6134	5.4325	5.5431	96.8923	138.22	177.149	5.7345	6.1099	6.4705	0.36	0.5359	0.6177	6.4541	4.6416	3.7023	0.4439	18.562	33.1193	0.8483	-1.8806	0.2366	0.2603	1.3587	7.0719	7.2705	3.4236	4.1296	7.4692	5.653	0.4777	-0.9135	-0.8858	-1.4317	-1.4041	0.7443	59.6903	4.92	3.1606	6.9026	12.2905	5.9823
S082WTS011	Codilean et al. 2022	1408.25		6.3607	6.8139	0.41615	0.6355	0.7326	4.5864	5.3923	5.4659	84.5152	123.02	157.433	5.0026	5.4256	5.5252	0.2773	0.4253	0.5084	6.5521	4.321	3.8784	-1.6057	0.069	0.7347	0.2271	-1.9569	0.138	0.2409	1.3413	5.663	6.4328	1.6943	2.8405	5.5973	3.9872	-2.0602	-0.6966	-0.6757	-1.1983	-1.1793	1.0251	80.3637	3.737	2.369	2.7419	9.2103	4.7925
S009WTS063	Codilean et al. 2022	79039.8		2.3331	6.1261	0.06305	0.1169	0.1733	2.7515	4.6873	4.6988	8.973	14.0749	19.3675	2.8333	3.0012	3.04	0.037	0.0628	0.0864	6.5718	4.254	3.4903	-0.0541	26.003	54.3453	1.2573	-2.331	0.6328	0.2614	1.3899	6.794	6.8675	1.552	2.0059	5.9043	3.7956	0.7853	-1.6607	-1.5765	-2.0107	-1.9611	0.3725	1.6856	11.827	4.5973	2.3026	9.2103	4.6052
S182WTS048	Codilean et al. 2022	21541.1		3.6331	6.8327	0.16973	0.3202	0.4084	3.2999	4.8806	4.9609	26.8435	44.9853	60.4526	3.7783	4.272	4.7388	0.0912	0.1696	0.2304	7.1189	4.8163	4.3114	0.1205	28.939	49.554	1.344	-2.2331	0.5875	0.3087	1.3947	7.4033	7.2441	2.8493	3.8446	6.446	4.8509	1.1233	-0.3743	0.2361	-0.8158	-0.408	1.6191	65.2071	4.577	3.0756	2.3026	9.2103	4.6052
S023WTS025	Codilean et al. 2022	4705.51		5.1543	6.5176	0.10458	0.0643	0.0952	2.8462	4.6998	4.7101	7.3704	9.9998	12.0385	2.8099	2.9869	3.0564	0.0223	0.034	0.0443	5.8603	3.8562	3.2377	-1.3687	0.02	0	0.2084	-2.21	0.1581	0.1677	1.0975	5.9043	5.9599	-0.7012	0.5499	4.7853	2.7567	-2.2327	-1.6246	-1.4188	-1.9907	-1.8637	0.4752	0	6.476	0	3.5886	9.2103	5.2843
S061WTS019	Codilean et al. 2022	3649.02		5.4086	6.8409	0.234	0.4316	0.5766	3.3896	4.8682	4.9535	28.7719	50.5577	64.1573	3.1302	3.382	3.5982	0.1047	0.2052	0.295	7.1282	4.8072	4.4595	-0.5963	58.031	68.2011	1.4537	-2.6187	0.6741	0.2209	1.3436	6.7513	6.8078	0.3097	1.3658	4.9505	2.985	0.4285	-0.7052	-0.6009	-1.2794	-1.1838	1.0345	0	9.467	0	2.3026	9.2103	4.6052
S075WTS003	Codilean et al. 2022	3931.4		5.3341	6.052	0.41636	0.6303	0.7529	4.3593	5.3049	5.4296	74.0863	102.497	133.012	5.1343	5.4504	5.6214	0.2936	0.4466	0.5285	6.1149	4.4923	3.4399	0.1682	52.587	86.1451	0.8254	-2.4158	0.385	0.2272	1.2954	7.0737	6.8724	2.4727	3.1771	6.6995	4.8546	0.313	-1.032	-1.0533	-1.539	-1.5573	0.7152	100	2	0	6.6685	10.276	5.9645
S151WTS001	Codilean et al. 2022	583.789		7.2413	6.763	0.54532	0.77	0.9009	4.4751	5.3824	5.474	96.0905	131.053	161.689	5.5616	5.9153	6.203	0.3329	0.4932	0.5847	8.332	5.7232	4.7397	1.2485	94.672	71.4891	1.5538	-2.7822	0.7209	0.3282	1.3421	8.0713	7.7602	3.6816	4.2989	7.2428	5.3359	2.7735	-0.367	-0.3562	-0.8074	-0.7981	2.0915	0	6.166	0	4.9807	9.2103	4.6536
S086WTS010	Codilean et al. 2022	403.27		7.6112	6.6728	0.55226	0.7436	0.9462	4.6317	5.497	5.7943	98.9752	136.982	191.45	6.2457	6.7381	7.321	0.3306	0.518	0.6487	4.8431	4.5591	3.7321	-0.5777	4.283	8.155	0.4428	-1.8605	0.0635	0.2642	1.4313	6.2646	7.1493	3.3077	4.542	6.9733	5.6461	-0.8563	-0.2346	-0.2533	-0.844	-0.8398	1.4479	98.9547	2.783	0.0173	6.4678	12.6972	6.0592
S256WTS006	Codilean et al. 2022	121265		1.9051	6.8493	0.20852	0.4351	0.6192	4.3514	5.4223	5.5786	52.4715	83.3334	143.288	4.1994	4.7188	4.8061	0.1302	0.2368	0.3119	5.302	3.6894	2.9985	-2.0082	0	0	0.098	-0.5978	0.093	0.1504	1.1236	5.0615	5.2558	-0.3945	1.0567	4.7882	2.8405	-3.4937	0.3939	0.3663	-0.1668	-0.1727	1.315	0.5824	9.805	4.5878	2.3026	9.2103	4.6052
S164WTS033	Codilean et al. 2022	17638.5		3.833	6.9009	0.15409	0.3491	0.5146	3.4476	5.0391	5.1606	35.8941	69.9149	94.2574	4.6627	5.4006	5.914	0.1017	0.2286	0.3413	9.2543	5.6013	4.67	0.9127	67.383	93.874	1.5469	-2.5472	0.6618	0.2831	1.3345	8.405	8.3105	4.3384	5.8219	7.7453	6.6976	2.8354	-1.6251	-1.598	-1.9885	-1.9647	0.0598	100	2.018	0	2.3026	9.2103	4.6052
S071WTS042	Codilean et al. 2022	1896.26		6.0632	6.6441	0.46754	0.7052	0.7922	4.664	5.4902	5.6388	87.5025	129.513	174.378	5.5502	6.0436	6.188	0.2961	0.4681	0.5597	5.5869	4.1694	3.4085	-0.1204	12.014	12.8253	0.1684	-1.8812	0.106	0.277	1.4225	6.601	6.496	2.6856	3.5124	6.45	4.7011	-0.9572	-0.8393	-0.1733	-1.3213	-0.9216	0.9966	52.8579	4.46	0	5.3696	12.0602	5.9731
S123WTS002	Codilean et al. 2022	11416.4		4.268	6.8713	0.26567	0.5087	0.6834	4.4612	5.4324	5.6949	60.0357	100.745	155.532	5.02	5.5974	6.0179	0.1604	0.2789	0.4007	4.9252	3.9701	3.3299	-1.5927	0	0.0294	0.2358	-0.9322	0.1171	0.1994	1.176	5.5696	5.6081	0.7125	1.9448	5.0762	3.2961	-2.812	0.3174	0.36	-0.2792	-0.2371	1.6467	49.9794	6.339	2.6136	6.3804	9.2103	4.6334
S037WTS014	Codilean et al. 2022	1238.64		6.4891	6.0934	0.60457	0.8687	1.0786	4.6757	5.4633	5.5608	110.919	158.001	205.494	5.7254	6.1531	6.3972	0.4162	0.6302	0.7724	6.7465	4.9186	3.9985	0.5022	29.49	44.7538	1.0229	-2.1153	0.3425	0.2811	1.489	7.2578	7.5749	3.2779	3.9054	7.403	5.5098	1.0593	-1.2171	-1.1977	-1.6581	-1.6492	0.6105	83.0702	3.123	2.2835	6.2475	9.5885	5.7906
S164WTS074	Codilean et al. 2022	53506.2		2.7233	6.8862	0.10487	0.2089	0.3223	2.8414	4.7326	4.8006	15.4739	31.9479	45.6334	3.7623	4.0931	4.5753	0.0501	0.0968	0.1717	8.5626	5.1232	4.5906	0.7034	77.806	80.6222	1.5804	-2.6078	0.6718	0.2668	1.207	8.1078	8.0495	3.5864	5.1782	7.0527	6.0781	2.4781	-1.6145	-1.5921	-1.9611	-1.9456	0.0774	100	2	0	2.3026	9.2103	4.6052
S207WTS024	Codilean et al. 2022	908.675		6.7988	6.0853	0.469	0.7419	0.9044	4.6024	5.4212	5.5428	94.9505	135.047	174.927	5.744	6.1121	6.4776	0.3553	0.5316	0.6149	6.4649	4.6526	3.7135	0.4598	16.547	32.807	0.8443	-1.8471	0.2233	0.2603	1.3587	7.0763	7.2931	3.3264	4.0168	7.4548	5.6233	0.4745	-0.9135	-0.8858	-1.4317	-1.4041	0.7443	62.2025	4.665	3.0657	6.9585	12.3689	5.9996
S127WTS044	Codilean et al. 2022	1956.12		6.0321	6.8142	0.29765	0.5285	0.697	3.9073	5.0923	5.1791	52.6093	78.9811	101.885	3.662	4.1481	4.3056	0.1799	0.2964	0.3677	7.3098	4.8389	4.4244	-0.6241	48.633	77.7941	1.7254	-2.4937	0.7162	0.2085	1.3023	6.7197	6.6113	-0.4432	0.6647	4.7853	2.7054	0.3485	-0.2111	-0.1717	-0.8045	-0.7696	1.054	0	8.675	0	2.3026	9.2103	4.6052
S130WTS003	Codilean et al. 2022	37346.5		3.0828	6.7459	0.21697	0.4535	0.5981	3.8979	5.1291	5.2607	42.993	72.5803	98.954	4.1061	4.4642	4.9742	0.1451	0.2784	0.3778	6.2329	4.0004	3.449	-1.5586	0	0.0433	0.1664	-1.2344	0.1309	0.2185	1.2283	5.7202	6.7154	0.7314	1.7652	5.1278	3.2544	-1.8004	-0.9671	-0.8326	-1.4036	-1.2903	1.0637	7.8102	8.1	3.5371	2.4282	9.2103	4.6234
S023WTS012	Codilean et al. 2022	15956.5		3.9332	6.4731	0.04675	0.1292	0.2558	3.0015	4.7315	4.7545	12.2525	17.3344	25.2089	2.6335	2.7535	2.7756	0.0436	0.0699	0.1132	5.5528	4.0336	3.5632	-1.2707	2.457	3.0946	0.4097	-2.2557	0.2057	0.1563	1.1029	6.0296	5.9332	-2.7806	-1.3548	4.6269	2.3851	-2.0568	-1.6597	-1.5037	-2.0387	-1.9533	0.4965	0.0337	6.679	2.7505	3.5724	9.2103	5.2624
S082WTS030	Codilean et al. 2022	28876.7		3.34	6.7423	0.22993	0.4544	0.5986	3.8948	5.127	5.2569	42.9792	72.5816	98.9803	4.0895	4.4433	4.9011	0.1453	0.2789	0.3781	6.2329	4.0004	3.449	-1.5587	0	0.0467	0.1664	-1.2351	0.1307	0.2185	1.2283	5.7198	6.7154	0.7314	1.7652	5.1292	3.2564	-1.801	-0.9671	-0.8326	-1.4036	-1.2903	1.0637	7.8659	8.107	3.5381	2.4283	9.2103	4.6247
S023WTS011	Codilean et al. 2022	18121		3.806	6.4693	0.06411	0.1297	0.2563	3.0016	4.7315	4.7545	12.2563	17.3439	25.2239	2.6335	2.7542	2.7756	0.0436	0.0701	0.1133	5.5528	4.0336	3.5632	-1.2703	2.465	3.1091	0.4097	-2.2557	0.2057	0.1563	1.1029	6.03	5.9332	-2.7806	-1.3548	4.627	2.3853	-2.0565	-1.6597	-1.5037	-2.0387	-1.9533	0.4965	0.0338	6.675	2.7491	3.5734	9.2103	5.2628
S129WTS002	Codilean et al. 2022	22686.5		3.5813	6.6491	0.21601	0.4111	0.5476	4.1577	5.2299	5.3291	46.8392	72.478	105.887	4.1171	4.4942	4.697	0.1465	0.2326	0.3109	6.7677	4.6942	4.3753	-1.0949	17.973	1.9435	0.7087	-2.1707	0.4182	0.1919	1.3322	6.3117	6.207	-0.2653	0.7232	4.8473	2.7786	-1.134	-0.2509	-0.3327	-0.8486	-0.8855	1.0678	100	2	0	3.1992	9.2103	4.7529
S070WTS003	Codilean et al. 2022	8776.52		4.531	6.3333	0.3407	0.5833	0.6735	4.096	5.1122	5.1777	53.8143	77.3952	92.3844	3.7875	3.9832	4.2372	0.2054	0.3315	0.4023	5.4134	3.8233	3.2147	-1.0963	0	9.1135	0.1379	-1.1129	0.1135	0.2007	1.212	5.8763	5.7981	-1.2242	0.0516	4.732	2.6446	-2.2801	-0.466	-0.0724	-0.9872	-0.7813	1.3258	63.3543	6.166	0	4.7254	10.0329	5.9492
S182WTS022	Codilean et al. 2022	6194.6		4.8794	6.711	0.3199	0.5032	0.6055	3.8748	5.0357	5.0937	45.7898	66.4452	82.5283	4.6583	4.9433	5.2431	0.1642	0.2522	0.308	7.4329	4.732	4.2337	-0.1235	55.142	95.6806	1.3106	-2.4925	0.6178	0.2956	1.4321	7.0871	7.1734	2.5764	3.5819	6.31	4.7103	0.9557	-0.9467	-0.3936	-1.3276	-1.0584	0.9392	0	6.11	0	2.3026	9.2103	4.6052
S075WTS011	Codilean et al. 2022	3727.64		5.3873	5.9916	0.47315	0.7071	0.843	4.2593	5.3139	5.4228	83.908	121.072	156.34	5.123	5.5682	6.0769	0.339	0.52	0.6022	6.6653	4.6599	3.5517	0.6202	52.57	63.3574	0.92	-2.4281	0.3624	0.2136	1.2673	7.4585	7.3033	2.8803	3.435	7.1098	5.1405	0.9682	-0.8804	-0.8677	-1.4049	-1.3996	0.858	99.4632	2.017	0.1558	6.9966	9.2103	6.0338
S105WTS006	Codilean et al. 2022	30226.3		3.2944	6.3313	0.1135	0.2214	0.3608	3.3194	4.8134	4.8562	19.5669	30.9019	40.5663	3.2942	3.5606	3.6842	0.0678	0.1243	0.1855	5.4937	3.9344	3.249	-0.7575	0	0.1141	0.3714	-1.7533	0.164	0.2255	1.3079	6.1198	6.0612	-0.4277	1.017	4.8722	3.0344	-1.6645	-0.639	-0.222	-1.0915	-0.8294	1.2101	14.248	8.234	3.5041	5.2506	9.5446	6.0545
S037WTS013	Codilean et al. 2022	1274		6.4609	5.8582	0.6008	0.8726	1.0909	4.6864	5.4536	5.5608	110.849	161.859	207.203	5.7432	6.1493	6.4262	0.4115	0.6336	0.7799	6.6513	4.9062	3.9792	0.515	27.168	41.0889	1.0147	-2.0683	0.321	0.2786	1.4921	7.2504	7.5631	3.0925	3.715	7.4048	5.5069	1.0028	-1.2123	-1.1891	-1.6529	-1.6414	0.6143	81.3842	3.177	2.2878	6.3248	9.6514	5.8371
S070WTS006	Codilean et al. 2022	1047.17		6.657	6.1467	0.508	0.741	0.8328	4.5625	5.3885	5.5869	85.7336	116.358	148.373	4.0547	4.2421	4.6602	0.3191	0.4802	0.5623	5.4139	4.0479	3.3388	-0.8185	0.13	6.4258	0.1894	-1.595	0.1285	0.2059	1.2895	6.0809	5.9236	-2.2538	-0.9314	4.6567	2.4643	-1.9216	-0.5975	-0.2353	-1.0694	-0.9153	1.3013	47.5205	5.89	0.4005	5.1912	10.457	5.9738
S108WTS005	Codilean et al. 2022	1265.47		6.4676	6.4573	0.52975	0.7526	0.9175	4.7108	5.5348	5.7573	102.232	144.603	189.272	5.4018	6.0205	6.2957	0.3437	0.5259	0.6311	5.5819	4.3602	3.7767	-0.8245	34.211	32.2456	0.8925	-2.3413	0.2843	0.2742	1.4658	6.129	6.5251	1.9088	2.9626	5.9616	4.3565	-1.0041	-0.5143	-0.4376	-1.0134	-0.9571	1.1032	66.6275	3.271	0	4.5352	10.5211	5.7959
S096WTS012	Codilean et al. 2022	1371.63		6.3871	5.9287	0.4579	0.6703	0.8257	4.3415	5.2987	5.38	82.6062	112.905	146.301	4.9342	5.1532	5.496	0.3206	0.4584	0.5501	5.8157	4.4597	3.5059	0.3134	17.801	42	0.6239	-1.8878	0.2862	0.27	1.3521	7.157	6.7858	1.9557	2.8161	6.3427	4.6153	0.0918	-0.8347	-0.8196	-1.3579	-1.3436	0.9724	67.9856	4.57	3.1997	5.6776	9.2103	5.8594
S279WTS006	Codilean et al. 2022	169771		1.5686	6.4746	0.01985	0.0318	0.0408	2.6672	4.6624	4.6708	4.6166	6.0694	6.6322	2.9467	3.2437	3.2684	0.0113	0.0152	0.0187	6.8686	4.8035	4.2539	-0.8977	1.918	0	0.6376	-2.2036	0.3856	0.1725	1.1441	6.4991	6.4783	0.6709	2.4244	5.2043	3.8935	-0.836	-1.982	-1.8715	-2.1161	-2.0472	0.1265	99.5436	2.03	0	2.3026	9.2103	4.6052
S096WTS013	Codilean et al. 2022	1610.22		6.2267	5.7709	0.4464	0.6511	0.8009	4.2987	5.2738	5.3623	79.9142	109.104	136.713	4.9152	5.1438	5.2563	0.3161	0.451	0.5329	5.8157	4.4597	3.5059	0.3194	16.629	39.7968	0.5886	-1.8812	0.2816	0.2652	1.3352	7.1563	6.7906	1.8434	2.696	6.3509	4.6173	0.0885	-0.8347	-0.8196	-1.3579	-1.3436	0.985	76.8422	3.714	2.7409	5.6817	9.2103	5.8684
S021WTS015	Codilean et al. 2022	68249.6		2.4799	6.8783	0.22153	0.3616	0.495	3.8876	5.0957	5.2508	41.8177	64.0403	86.7461	4.9244	5.4317	5.6947	0.1378	0.2239	0.2948	8.1241	5.1802	4.5742	0.5963	77.856	54.2603	1.5306	-2.6593	0.6731	0.2889	1.2899	7.9188	7.8192	3.6974	4.4292	7.1611	5.361	2.2024	-1.8313	-1.8573	-2.0786	-2.0867	0.0549	91.3262	2.268	0.1267	2.3026	9.2103	4.6052
S127WTS014	Codilean et al. 2022	7452.9		4.6945	6.7918	0.30883	0.4854	0.5835	4.1997	5.1712	5.2512	58.7102	79.3906	100.333	4.6683	4.915	5.081	0.1943	0.2851	0.337	6.5462	4.2248	3.6534	-0.6273	2.542	0	0.3471	-2.0503	0.2437	0.2517	1.3502	6.6847	6.6319	1.7058	2.9774	5.6171	4.1168	-0.8681	-0.9784	-0.9388	-1.3967	-1.37	1.2152	0	6.668	0	2.3026	9.2103	4.6052
S065WTS004	Codilean et al. 2022	24626.8		3.4992	6.5477	0.1062	0.2134	0.3691	3.2187	4.8059	4.9478	17.977	30.2625	43.3514	3.1304	3.4084	3.6431	0.0532	0.0962	0.1465	4.6441	3.9698	3.2232	-1.8953	0	0.0074	0	-0.5157	0.1102	0.1165	1.2252	5.3685	5.2774	-2.7806	-0.2021	4.6255	2.5355	-3.3443	-0.8505	-0.7119	-1.3116	-1.178	0.999	0	10.976	4.5841	2.3026	9.2103	4.6052
S256WTS002	Codilean et al. 2022	24597		3.5004	6.7903	0.20006	0.4356	0.6054	4.1649	5.2406	5.6353	49.0624	75.9263	123.621	4.6189	5.1989	5.4113	0.122	0.2335	0.3253	4.7283	3.7706	3.132	-1.8703	0	0	0.2363	-0.6203	0.0882	0.1975	1.2683	5.2513	5.4763	-0.1278	1.0976	4.8501	2.8807	-3.212	0.3819	0.4384	-0.2273	-0.1557	1.7232	14.5562	8.726	3.8834	2.3026	9.2103	4.6052
S045WTS008	Codilean et al. 2022	3005.79		5.6025	6.5615	0.4276	0.6594	0.7779	4.5592	5.4197	5.5517	80.3172	118.961	153.7	5.6218	6.1424	6.2976	0.2755	0.4437	0.5408	6.6745	4.2102	3.4927	-0.2732	56.853	57.4563	0.7774	-2.4191	0.369	0.2768	1.4645	6.6111	6.765	3.85	4.6548	7.5687	5.8504	-0.1573	-0.4612	0.2167	-0.9462	-0.4336	1.6392	78.0093	5.168	0	4.6025	10.8887	5.7515
S230WTS017	Codilean et al. 2022	441.901		7.5197	6.283	0.50766	0.815	0.9787	4.7055	5.4595	5.5761	102.978	147.702	182.475	5.6604	5.9759	6.2127	0.3819	0.5915	0.684	4.6934	4.0092	3.2665	-0.223	0	4.5623	0.2756	-1.278	0.0952	0.1984	1.2296	6.645	6.5887	2.4067	3.6816	6.478	5.1473	-0.984	0.062	0.0469	-0.4737	-0.4886	2.0817	26.9487	4.922	0	6.1927	13.1491	6.0138
S038WTS034	Codilean et al. 2022	100111		2.0968	6.6987	0.0508	0.0981	0.1526	2.988	4.7529	4.8022	11.6361	17.7323	28.5315	2.7813	2.88	3.1872	0.0245	0.0397	0.067	6.0771	4.2469	3.7252	-1.3115	0.175	0	0.4363	-1.9726	0.287	0.1906	1.1526	6.2495	6.237	-1.4065	-0.0965	4.6834	2.53	-1.6154	-1.7916	-1.7232	-2.0939	-2.0604	0.2705	100	3.993	0	2.3026	9.2103	4.6052
S156WTS017	Codilean et al. 2022	106802		2.0321	6.3376	0.17455	0.3223	0.434	3.2621	4.8372	4.9091	22.9379	36.8396	48.7868	3.7852	3.9908	4.4	0.0857	0.1527	0.2165	7.1276	4.6759	4.062	-0.0493	94.753	80.7848	1.2371	-3.4327	0.6005	0.2745	1.4351	7.0434	7.0677	2.1418	3.267	6.2213	4.7198	0.8765	-1.5362	-1.4868	-2.0242	-1.998	0.4091	27.3629	6.296	3.3478	4.0535	9.2103	4.6245
S127WTS026	Codilean et al. 2022	11726.9		4.2412	6.7137	0.25797	0.4646	0.6205	3.8911	5.1318	5.2888	45.4776	72.0421	100.858	4.0088	4.5206	4.8858	0.1587	0.2644	0.3573	6.6631	4.584	4.1915	-0.654	15.12	13.1506	1.088	-2.1312	0.466	0.2199	1.2469	6.664	6.6977	1.717	2.7113	5.6695	3.9551	-0.2524	-0.9986	-0.9329	-1.4859	-1.4271	1.0447	0	7.41	0	2.3026	9.2103	4.6052
S164WTS005	Codilean et al. 2022	30384		3.2891	6.7931	0.10224	0.2268	0.5333	3.087	4.8099	5.1011	29.9341	68.6328	111.439	3.8865	4.1913	5.1826	0.0577	0.1135	0.3228	8.2912	5.0018	4.4954	0.3251	34.543	38.8754	1.4086	-2.2424	0.5942	0.2979	1.4723	7.8303	7.7753	3.8561	4.9954	7.3804	5.9817	1.7523	-1.1924	-1.0741	-1.6766	-1.5838	0.4279	99.9999	2	0	2.3026	9.2103	4.6052
S140WTS003	Codilean et al. 2022	380.755		7.6687	6.5093	0.47583	0.8135	1.0317	4.9805	5.6907	5.8574	110.742	166.208	228.191	5.8966	6.2542	6.7502	0.3654	0.6078	0.7545	5.6712	4.6023	4.0174	-0.6629	19.823	21.7671	0.7544	-2.6564	0.1923	0.2712	1.4393	6.2485	7.2745	2.4326	3.5874	6.3377	4.8783	-0.4781	-0.4135	-0.2351	-0.9073	-0.7866	1.1602	100	2.423	0	5.9331	12.1775	5.9095
S229WTS004	Codilean et al. 2022	524.696		7.348	5.8625	0.57403	0.8612	1.0718	4.6442	5.5027	5.5911	108.718	154.468	197.977	5.8383	6.2453	6.4089	0.4179	0.6385	0.7592	6.6554	4.5877	3.6644	0.635	19.234	31.8577	0.7588	-1.7165	0.1699	0.2566	1.3583	7.2195	7.4224	3.1052	3.7804	7.4137	5.5666	0.5797	-1.057	-1.0399	-1.5413	-1.5292	0.7666	65.8841	3.721	2.6116	6.9031	12.3069	5.9871
S229WTS002	Codilean et al. 2022	727.07		7.0218	5.8625	0.57403	0.8612	1.0718	4.6442	5.5027	5.5911	108.718	154.468	197.977	5.8383	6.2453	6.4089	0.4179	0.6385	0.7592	6.6554	4.5877	3.6644	0.635	19.234	31.8577	0.7588	-1.7165	0.1699	0.2566	1.3583	7.2195	7.4224	3.1052	3.7804	7.4137	5.5666	0.5797	-1.057	-1.0399	-1.5413	-1.5292	0.7666	65.8841	3.721	2.6116	6.9031	12.3069	5.9871
S229WTS003	Codilean et al. 2022	597.425		7.2182	5.8625	0.57403	0.8612	1.0718	4.6442	5.5027	5.5911	108.718	154.468	197.977	5.8383	6.2453	6.4089	0.4179	0.6385	0.7592	6.6554	4.5877	3.6644	0.635	19.234	31.8577	0.7588	-1.7165	0.1699	0.2566	1.3583	7.2195	7.4224	3.1052	3.7804	7.4137	5.5666	0.5797	-1.057	-1.0399	-1.5413	-1.5292	0.7666	65.8841	3.721	2.6116	6.9031	12.3069	5.9871
S229WTS006	Codilean et al. 2022	690.447		7.0735	5.8625	0.57403	0.8612	1.0718	4.6442	5.5027	5.5911	108.718	154.468	197.977	5.8383	6.2453	6.4089	0.4179	0.6385	0.7592	6.6554	4.5877	3.6644	0.635	19.234	31.8577	0.7588	-1.7165	0.1699	0.2566	1.3583	7.2195	7.4224	3.1052	3.7804	7.4137	5.5666	0.5797	-1.057	-1.0399	-1.5413	-1.5292	0.7666	65.8841	3.721	2.6116	6.9031	12.3069	5.9871
S229WTS005	Codilean et al. 2022	552.894		7.2957	5.8625	0.57403	0.8612	1.0718	4.6442	5.5027	5.5911	108.718	154.468	197.977	5.8383	6.2453	6.4089	0.4179	0.6385	0.7592	6.6554	4.5877	3.6644	0.635	19.234	31.8577	0.7588	-1.7165	0.1699	0.2566	1.3583	7.2195	7.4224	3.1052	3.7804	7.4137	5.5666	0.5797	-1.057	-1.0399	-1.5413	-1.5292	0.7666	65.8841	3.721	2.6116	6.9031	12.3069	5.9871
S229WTS001	Codilean et al. 2022	746.861		6.9949	5.8625	0.57403	0.8612	1.0718	4.6442	5.5027	5.5911	108.718	154.468	197.977	5.8383	6.2453	6.4089	0.4179	0.6385	0.7592	6.6554	4.5877	3.6644	0.635	19.234	31.8577	0.7588	-1.7165	0.1699	0.2566	1.3583	7.2195	7.4224	3.1052	3.7804	7.4137	5.5666	0.5797	-1.057	-1.0399	-1.5413	-1.5292	0.7666	65.8841	3.721	2.6116	6.9031	12.3069	5.9871
S229WTS007	Codilean et al. 2022	534.094		7.3302	5.8625	0.57403	0.8612	1.0718	4.6442	5.5027	5.5911	108.718	154.468	197.977	5.8383	6.2453	6.4089	0.4179	0.6385	0.7592	6.6554	4.5877	3.6644	0.635	19.234	31.8577	0.7588	-1.7165	0.1699	0.2566	1.3583	7.2195	7.4224	3.1052	3.7804	7.4137	5.5666	0.5797	-1.057	-1.0399	-1.5413	-1.5292	0.7666	65.8841	3.721	2.6116	6.9031	12.3069	5.9871
S026WTS003	Codilean et al. 2022	41555.3		2.976	6.1279	0.08127	0.164	0.2434	2.8639	4.7395	4.7752	14.7596	24.088	30.1173	3.3788	3.6976	3.8173	0.0472	0.0953	0.1334	7.401	4.7231	4.1002	-0.0071	81.25	58.6631	1.056	-3.2995	0.5524	0.2816	1.5274	7.0694	7.1386	2.0675	3.1419	6.3028	4.7655	0.844	-1.8458	-1.7874	-2.1345	-2.107	0.2442	44.6851	6.423	3.6126	4.391	9.2103	5.1811
S037WTS009	Codilean et al. 2022	1922.93		6.0492	5.8425	0.28321	0.4828	0.6615	3.7605	5.0068	5.0562	44.1316	67.2976	90.6003	4.5662	4.951	5.1496	0.1823	0.2991	0.4151	7.1158	4.4424	3.5087	0.5496	54.957	53.4828	1.2149	-2.7242	0.5696	0.2825	1.4427	7.3324	7.4286	2.7784	3.2754	7.124	5.1008	1.562	-1.0387	-0.9808	-1.538	-1.4939	0.6973	0	8.992	3.713	5.4216	9.2103	5.4236
S037WTS008	Codilean et al. 2022	2487.18		5.7919	5.8425	0.28321	0.4828	0.6615	3.7605	5.0068	5.0562	44.1316	67.2976	90.6003	4.5662	4.951	5.1496	0.1823	0.2991	0.4151	7.1158	4.4424	3.5087	0.5496	54.957	53.4828	1.2149	-2.7242	0.5696	0.2825	1.4427	7.3324	7.4286	2.7784	3.2754	7.124	5.1008	1.562	-1.0387	-0.9808	-1.538	-1.4939	0.6973	0	8.992	3.713	5.4216	9.2103	5.4236
S009WTS015	Codilean et al. 2022	18378.4		3.7919	5.7912	0.0306	0.1505	0.2386	2.9268	4.7265	4.7688	12.6829	19.7969	31.5031	3.3761	3.8064	4.0146	0.041	0.0624	0.1044	6.9701	4.3623	3.5582	0.2383	41.056	44.3071	1.2133	-2.4281	0.5764	0.2968	1.4089	6.9513	6.8929	2.0208	2.5829	6.4865	4.5021	0.883	-0.946	-0.8933	-1.4546	-1.4317	0.6125	0	9.398	3.8266	4.6014	9.2103	5.3187
S143WTS023	Codilean et al. 2022	1629.51		6.2148	5.9392	0.22467	0.3756	0.4972	3.7691	5.0215	5.0891	40.2445	59.3787	76.8253	4.3332	4.6848	4.7656	0.1544	0.2372	0.2935	7.4115	4.6853	3.9569	0.3548	75.529	59.3155	1.1693	-3.0283	0.5831	0.2554	1.3976	7.2529	6.9609	2.3009	2.9	6.6282	4.6836	1.0476	-0.4302	-0.3179	-0.9383	-0.8482	1.1861	0	10.824	4.4207	4.8296	9.2103	4.7858
S226WTS018	Codilean et al. 2022	1329.93		6.4179	6.5061	0.39268	0.609	0.7133	4.5305	5.3576	5.4219	79.2286	114.88	150.591	4.9963	5.4259	5.4269	0.2587	0.3945	0.4733	6.5004	4.2526	3.7956	-1.6414	0	0.9604	0.1897	-1.9112	0.1149	0.2455	1.3618	5.6226	6.339	1.5063	2.6459	5.6511	4.0512	-2.2281	-0.7142	-0.6834	-1.2076	-1.1809	1.0251	79.5029	3.819	2.364	2.5882	9.2103	4.7691
S082WTS038	Codilean et al. 2022	59743.4		2.613	6.5314	0.18363	0.3318	0.4229	3.6072	4.9577	5.0246	31.958	50.5657	63.8334	3.4471	3.7074	3.811	0.1109	0.1933	0.2599	6.3472	4.0172	3.5353	-1.4715	0	0.3958	0.1642	-1.4363	0.1411	0.2542	1.3831	5.8232	6.6554	-0.3411	0.7793	4.853	2.8421	-1.7589	-1.023	-0.9081	-1.4469	-1.3478	1.0624	0	9.122	3.6863	2.3026	9.2103	4.6052
S070WTS008	Codilean et al. 2022	2071.22		5.9749	6.1275	0.5106	0.7279	0.8159	4.5732	5.3511	5.4472	87.865	115.014	140.193	4.3957	4.593	4.6994	0.3232	0.4633	0.5431	5.5038	4.0337	3.3182	-0.7746	0.903	5.0916	0.2426	-1.675	0.1428	0.198	1.2708	6.1316	5.9633	-0.7919	0.7443	4.8286	2.982	-1.8168	-0.5957	-0.2411	-1.0773	-0.9424	1.2684	31.1333	6.045	0.1852	5.1207	10.2728	5.9718
S025WTS041	Codilean et al. 2022	2407.74		5.8244	6.6136	0.52588	0.7631	0.9089	4.9014	5.642	5.83	107.543	148.959	209.957	5.3331	5.7036	6.1248	0.3324	0.4927	0.5951	7.1801	4.483	3.9489	-0.3268	50.688	45.3496	1.0564	-2.3351	0.4608	0.2679	1.3859	6.8918	7.0456	1.1253	2.3588	5.3691	3.7474	0.2818	-0.7369	-0.7791	-1.2076	-1.2386	1.2123	38.6016	4.652	0	4.6836	9.9228	4.8131
S025WTS030	Codilean et al. 2022	4631.96		5.1701	6.6076	0.34028	0.5692	0.7079	4.3567	5.2954	5.3905	64.2605	100.45	135.156	4.6312	5.069	5.0969	0.2089	0.3442	0.4506	6.4076	3.9983	3.4735	-0.764	1.498	0.8903	0.3104	-1.7293	0.2055	0.248	1.3595	6.4437	6.4161	0.6549	1.8928	5.1468	3.4156	-1.2569	-0.5646	-0.517	-1.0538	-0.9994	1.1546	0.4424	8.972	0	5.0551	9.9038	4.7644
S026WTS005	Codilean et al. 2022	73880.3		2.4006	6.0753	0.13805	0.2432	0.3641	2.9	4.738	4.764	18.2626	32.3528	43.8587	3.7175	4.2316	4.3288	0.08	0.1495	0.2167	7.3378	4.5969	4.0521	0.0037	83.504	68.8552	1.1137	-3.3932	0.5775	0.2833	1.4988	7.0506	7.0963	1.9681	3.1321	6.2569	4.7959	0.8814	-1.9052	-1.8878	-2.1456	-2.1388	0.229	13.3975	5.004	2.5445	4.5276	9.2103	5.2436
S067WTS004	Codilean et al. 2022	936667		-0.1393	6.4975	0.062	0.0962	0.1656	3.4296	4.8908	4.9438	17.5017	26.1977	37.8438	2.7856	2.9208	2.9302	0.048	0.0693	0.0988	4.6258	3.7366	3.1349	-2.276	0	0.0041	0	-0.5693	0.0649	0.1595	1.1005	4.666	4.8595	-4.5099	-3.6889	4.6056	2.3077	-4.111	0.1669	0.2859	-0.3962	-0.2679	1.3912	27.681	9.076	3.4512	2.3026	9.2103	4.6052
S009WTS003	Codilean et al. 2022	43139.2		2.9386	5.6981	0.11243	0.2051	0.2816	2.9905	4.7638	4.8097	18.1956	31.3858	42.2622	3.0674	3.3914	3.6139	0.0741	0.1311	0.1924	6.5892	4.3074	3.498	0.2041	53.081	46.0836	1.2152	-2.6409	0.5888	0.2724	1.4533	6.8602	6.8688	1.4873	2.4477	6.1088	4.4447	0.8686	-1.8515	-1.8573	-2.0964	-2.1005	0.3716	95.2944	2.47	1.7415	4.7581	9.2103	5.4156
S070WTS002	Codilean et al. 2022	23176.9		3.5599	6.0824	0.3233	0.5875	0.6914	4.0408	5.1655	5.3237	50.0923	79.0997	101.742	3.6546	4.3233	4.3602	0.1929	0.3223	0.4067	5.3672	3.7977	3.2031	-1.0775	0	8.8838	0	-1.1138	0.1024	0.1981	1.2823	5.8724	5.8017	-1.8452	-0.5692	4.6884	2.5399	-2.2916	-0.4169	0.1174	-0.9652	-0.6996	1.292	52.0503	6.007	1.6832	4.8512	9.9756	5.9643
S009WTS057	Codilean et al. 2022	11927.7		4.2242	5.7613	0.10665	0.2581	0.3483	3.4508	4.8873	4.9524	23.7297	35.2189	47.7774	4.1042	4.3686	4.7412	0.0813	0.1315	0.168	7.0314	4.5715	3.8326	0.2231	37.761	50.7335	1.1677	-2.5035	0.5981	0.2739	1.3168	7.1117	7.192	1.8807	2.2899	6.3879	4.2655	1.1845	-1.3452	-1.3685	-1.8097	-1.8208	0.5008	100	2.391	0	4.7814	9.2103	5.1726
S108WTS023	Codilean et al. 2022	3048.52		5.5884	6.2959	0.51163	0.7301	0.8831	4.7363	5.4753	5.5492	101.616	137.685	176.283	5.33	5.6889	5.7655	0.3455	0.4893	0.5808	6.1548	4.8363	4.2069	-0.1954	74.428	73.6161	1.2606	-2.9096	0.5337	0.2463	1.2943	6.9504	7.0476	1.9418	3.0374	6.0912	4.5444	0.5737	-0.3993	-0.3817	-0.9256	-0.9113	1.2132	37.6508	5.433	3.3289	4.4723	9.2103	5.105
S092WTS027	Codilean et al. 2022	215013		1.3324	6.4486	0.11975	0.2169	0.3479	3.1906	4.8218	4.8956	18.5585	28.5033	41.6354	3.7724	4.3069	4.6262	0.0656	0.1069	0.1493	7.1212	4.6535	4.0836	0.0279	11.14	22.1138	0.8054	-2.3056	0.4281	0.2563	1.3923	7.2269	7.1289	2.3236	3.3504	6.2914	4.7091	0.5384	-2.0923	-2.0883	-2.2238	-2.2219	0.01	31.8784	4.183	0.929	2.3026	9.2103	4.6052
S067WTS007	Codilean et al. 2022	1.69771e+06		-0.734	6.4891	0.0611	0.0955	0.1622	3.4273	4.8904	4.9441	17.3587	25.7103	37.3706	2.7869	2.9208	2.9302	0.0478	0.069	0.0973	4.6258	3.7366	3.1349	-2.2759	0	0.0042	0	-0.566	0.0649	0.1595	1.1005	4.6663	4.8595	-4.5099	-3.6889	4.6056	2.3077	-4.1109	0.1669	0.2859	-0.3962	-0.2679	1.3912	27.5445	9.093	3.454	2.3026	9.2103	4.6052
S095WTS005	Codilean et al. 2022	4088.4		5.2949	6.0993	0.4235	0.6544	0.7326	4.4665	5.3087	5.384	73.3233	99.7439	125.674	4.4381	4.6919	4.7792	0.2643	0.3877	0.4532	5.6816	4.0107	3.3196	-0.6721	2.195	19.2034	0.3876	-1.7098	0.1877	0.209	1.3318	6.1969	6.0406	0.1213	1.4547	5.1043	3.4112	-1.5553	-0.6218	-0.2733	-1.0912	-0.9334	1.2228	61.9528	5.648	0	5.2539	9.8755	6.0067
S140WTS004	Codilean et al. 2022	740.899		7.003	6.3951	0.37395	0.702	0.8959	4.5371	5.4524	5.7089	79.0725	125.297	164.001	5.4485	5.8852	6.287	0.2761	0.4729	0.606	5.2968	4.4127	3.7807	-0.8585	9.848	19.0952	0.1465	-2.0341	0.1489	0.265	1.4238	6.0366	7.4095	3.5715	4.6894	7.4417	6.0244	-0.6246	-0.4213	-0.2454	-0.9223	-0.7923	1.1488	85.5694	4.656	1.4538	6.2303	11.5769	6.0491
S104WTS020	Codilean et al. 2022	685.222		7.0811	6.3108	0.5447	0.7792	0.9477	4.779	5.4865	5.5494	107.817	146.848	182.642	5.7759	6.0028	6.3981	0.3698	0.5268	0.6299	7.568	4.8481	4.2133	0.2121	52.083	56.4892	1.0807	-2.6353	0.4539	0.1982	1.3421	7.3364	7.4446	2.5563	3.6955	6.5858	5.1382	1.0168	-0.1684	-0.2421	-0.7831	-0.8391	1.615	51.5167	5.767	3.0284	5.3907	9.9995	5.4169
S261WTS038	Codilean et al. 2022	5116.47		5.0706	6.1303	0.13462	0.2455	0.4066	3.3744	4.8502	4.8865	21.6782	35.2975	45.9754	3.3371	3.5311	3.6682	0.0755	0.1281	0.2057	5.4951	3.9306	3.2362	-1.2395	13.325	13.9379	0.3134	-2.3147	0.2609	0.1644	1.0903	6.0869	6.1129	-0.5798	0.8398	4.8753	3.0292	-1.735	-1.3075	-1.1317	-1.7796	-1.6513	0.6275	0.0188	8.589	3.0347	4.0866	9.2103	5.3806
S283WTS029	Codilean et al. 2022	403.872		7.6097	5.5827	0.45739	0.791	1.0299	4.8294	5.624	5.6973	99.3659	143.793	195.238	5.9889	6.3041	6.6542	0.3716	0.5834	0.7159	6.1692	4.6836	3.7756	-0.0436	5.745	18.5728	0.5655	-1.9241	0.0778	0.2295	1.3463	6.5646	6.7414	2.4674	3.1889	7.0179	5.2032	-0.7617	-0.8228	-0.8251	-1.3318	-1.3341	0.8953	48.7148	4.864	2.8748	7.0442	13.2846	6.0721
S135WTS003	Codilean et al. 2022	11799.9		4.235	6.4733	0.28109	0.4353	0.5956	4.565	5.3767	5.4482	66.4139	95.5713	131.825	5.5072	5.9513	6.1654	0.2029	0.2898	0.3668	7.5727	4.7675	4.0639	0.3988	69.501	42.2041	1.0416	-2.6853	0.534	0.2434	1.2852	7.4767	7.4166	3.3646	3.857	7.1857	5.1593	1.3439	-0.1106	-0.137	-0.6605	-0.6794	1.4454	0	7	0	2.3026	9.2103	4.6052
S069WTS029	Codilean et al. 2022	2686.25		5.7149	5.7564	0.41557	0.634	0.7673	4.4719	5.3362	5.4766	77.551	107.068	136.587	5.1902	5.4649	5.9418	0.3042	0.4421	0.518	6.7147	4.3914	3.5868	-0.0308	60.861	62.7568	1.0932	-2.6091	0.4463	0.28	1.3618	6.7151	6.8467	1.8818	2.6773	6.3919	4.6104	0.299	-1.1438	-1.0939	-1.6139	-1.5799	0.7075	86.7552	4.59	1.6319	5.0914	9.2103	5.6584
S235WTS016	Codilean et al. 2022	23744.2		3.5357	6.3578	0.10524	0.2504	0.4079	3.3948	4.8939	4.9693	23.63	40.9312	60.4341	3.4039	3.7456	4.1168	0.0723	0.1417	0.2282	6.1325	4.3974	3.6129	-1.5509	0	0.0534	0.191	-0.758	0.1278	0.158	1.1479	5.9367	6.0845	2.8113	4.1029	6.774	5.4876	-2.3437	-0.4845	-0.3603	-0.9782	-0.8349	1.3342	0	10.667	4.2317	2.3026	9.2103	4.6052
S230WTS018	Codilean et al. 2022	1924.84		6.0482	6.0534	0.43033	0.7327	0.8696	4.6176	5.47	5.5754	87.9192	132.589	178.654	5.5413	5.9491	6.066	0.3165	0.5289	0.6334	4.8016	3.9134	3.18	-0.2035	0.14	4.5702	0.3639	-1.1279	0.0998	0.198	1.2399	6.6565	6.5546	2.1227	3.3652	6.3986	5.0283	-0.9864	0.1472	0.1658	-0.3447	-0.3503	2.1174	23.8166	5.44	1.9251	6.1236	11.9931	6.0339
S156WTS018	Codilean et al. 2022	82731		2.2875	6.1388	0.14477	0.2701	0.406	3.1195	4.8142	4.8978	20.4355	38.5381	54.0511	3.7175	4.0806	4.3646	0.0636	0.1229	0.2056	7.3273	4.7741	4.1227	0.042	98.021	90.0743	1.2806	-3.5166	0.6237	0.2655	1.4584	7.1705	7.1193	2.2998	3.1756	6.4891	4.7881	1.0508	-1.6363	-1.6332	-2.0479	-2.0464	0.3875	40.7729	2.6	0	2.3026	9.2103	4.6052
S105WTS008	Codilean et al. 2022	1093.21		6.6139	6.0907	0.193	0.365	0.4989	3.5442	4.8945	4.9455	29.2012	42.895	56.1664	3.2238	3.2969	3.7468	0.1073	0.1822	0.2467	5.8184	3.9865	3.2821	-0.5443	0.278	0.4245	0.4653	-1.9791	0.2703	0.2178	1.2462	6.3403	6.3983	-0.894	0.0825	4.8141	2.7179	-0.9358	-0.614	-0.2618	-1.1084	-0.885	1.1951	16.7541	8.791	3.469	4.2859	9.2103	5.9033
S075WTS012	Codilean et al. 2022	11591.7		4.2528	5.5042	0.38737	0.6011	0.7285	4.0585	5.1395	5.2396	63.2469	101.24	136.563	4.8168	5.2425	5.3183	0.2523	0.404	0.541	6.0554	4.3642	3.3568	0.0688	63.553	86.8007	1.0981	-2.4225	0.424	0.2214	1.2812	7.0192	6.6129	1.7535	2.3533	6.4397	4.4864	0.1163	-1.0244	-0.9678	-1.5201	-1.4705	0.7733	50.5461	4.741	1.8367	6.0767	9.2103	5.7938
S186WTS010	Codilean et al. 2022	78205.4		2.3437	5.8387	0.0386	0.0751	0.1557	2.7165	4.6861	4.7389	10.1399	19.5501	27.8934	3.2323	3.4653	3.9105	0.0229	0.0351	0.0871	7.4634	4.6949	4.0404	-0.0296	74.152	24.8084	0.9629	-3.2264	0.5489	0.2888	1.4921	7.0614	7.1048	1.9298	2.9032	6.3794	4.7582	0.7888	-1.8282	-1.7226	-2.132	-2.0851	0.2374	22.1093	4.386	0.7451	4.0796	9.2103	5.1022
S140WTS007	Codilean et al. 2022	160.009		8.5356	6.3638	0.39997	0.6694	0.8514	5.0736	5.7884	6.0326	113.963	158.93	252.224	6.6662	7.1485	7.5722	0.3413	0.5316	0.638	6.0916	4.9746	4.2621	-0.0548	39.516	32.642	0.6887	-2.9337	0.3129	0.2805	1.4606	6.9784	7.6965	4.3297	5.5342	8.1944	6.882	0.6618	-0.2049	-0.0977	-0.7306	-0.6451	1.2896	100	3.592	0	6.6658	12.291	5.55
S143WTS017	Codilean et al. 2022	3892.15		5.3441	5.8274	0.39843	0.6267	0.7756	4.3705	5.3034	5.3812	80.4718	113.432	143.4	4.9539	5.2949	5.4282	0.2923	0.4336	0.5256	6.5274	4.5952	3.7201	0.1165	33.799	63.3719	0.8728	-2.1328	0.3994	0.2811	1.4397	7.0168	6.8385	2.2163	2.8137	6.6307	4.6847	0.282	-0.793	-0.7733	-1.3056	-1.2913	0.9633	80.9923	5.09	2.6611	5.4512	9.2103	5.6034
S023WTS028	Codilean et al. 2022	14364.5		4.0383	6.153	0.05057	0.0731	0.133	2.8812	4.7057	4.7307	9.6714	14.9593	23.4924	2.7279	2.8906	2.9931	0.0283	0.0367	0.0777	5.7381	3.9069	3.3052	-1.4295	0.054	0	0.2344	-2.2082	0.1393	0.1692	1.1044	5.8609	5.823	-0.5482	0.9761	4.8785	3.092	-2.4455	-1.6266	-1.4516	-2.0017	-1.8951	0.4861	0	5.079	0	3.3152	9.2103	5.1898
S193WTS019	Codilean et al. 2022	1489.65		6.3045	6.2689	0.58056	0.6583	0.84	4.4799	5.5482	5.7946	78.3178	115.056	157.861	5.4564	6.0525	6.2397	0.2781	0.4386	0.5436	6.9263	4.9056	4.2918	0.2884	78.646	56.9064	0.7243	-3.0491	0.4909	0.321	1.3843	6.8921	7.2953	2.4663	3.4494	6.5389	4.941	1.0434	-0.4383	0.0869	-0.9705	-0.7531	0.8985	39.0139	5.61	2.1675	4.415	9.2103	5.2674
S224WTS021	Codilean et al. 2022	4819.61		5.1304	6.1231	0.19525	0.3795	0.4872	3.2876	4.8729	4.9428	26.6182	46.833	63.2838	3.5646	3.7506	4.1052	0.101	0.1925	0.2703	7.1896	4.5038	3.6858	-0.7716	58.184	24.2376	0.9488	-2.8525	0.4405	0.1774	1.3591	6.5593	6.4872	1.3957	2.8405	5.7946	4.497	-0.5891	-0.4608	-0.3087	-0.9838	-0.8326	1.3094	23.1363	6.942	2.6267	2.3026	9.2103	4.6052
S147WTS004	Codilean et al. 2022	129.761		8.7451	5.8541	0.56869	0.8206	1.0146	4.4726	5.3193	5.4215	98.8126	138.292	168.595	5.8054	6.2255	6.3426	0.3879	0.5772	0.6806	8.3274	5.3378	4.2964	1.333	18.697	42.3444	0.9042	-2.5943	0.3182	0.2815	1.5385	8.1327	8.1265	3.8242	4.1913	8.1079	5.9709	2.1023	-0.1617	-0.153	-0.5953	-0.5818	1.6258	72.4747	3.035	0.867	7.0786	11.5978	5.5401
S207WTS023	Codilean et al. 2022	480.011		7.437	5.7077	0.45964	0.7338	0.9013	4.6059	5.4362	5.5881	93.316	132.367	172.875	5.7595	6.2022	6.4094	0.3522	0.5259	0.6066	6.476	4.6322	3.695	0.4972	13.918	28.5838	0.8344	-1.8618	0.2107	0.2526	1.3168	7.0908	7.3062	3.0173	3.6982	7.4423	5.6013	0.4814	-0.9798	-0.9854	-1.481	-1.4824	0.7267	64.4684	4.043	2.7606	7.0701	12.6429	6.0129
S075WTS004	Codilean et al. 2022	1793.08		6.1191	5.6247	0.50727	0.7589	0.9194	4.1472	5.2054	5.2626	79.5763	111.207	139.443	5.2786	5.7839	5.935	0.3503	0.5351	0.6219	7.3402	4.9566	3.8277	0.9064	79.517	44.4548	1.2547	-2.8525	0.4883	0.2203	1.2848	7.7231	7.7797	3.2576	3.6727	7.729	5.6362	1.9231	-0.6559	-0.6236	-1.212	-1.1832	1.0188	80.0474	3.435	2.2178	7.0762	9.2103	5.8722
S164WTS046	Codilean et al. 2022	43811.8		2.9232	6.5221	0.0865	0.1758	0.2593	3.0353	4.6854	5.0662	19.7289	31.5624	79.4404	4.357	4.393	5.8104	0.0334	0.0452	0.0832	7.958	5.4145	4.6656	0.7905	12.463	86.6218	1.2595	-2.1328	0.6188	0.2616	1.2748	8.2444	8.0494	4.0144	5.4992	7.7581	6.7122	2.4063	-1.6045	-1.5205	-1.9421	-1.8898	0.0707	77.1839	5.562	3.1704	2.3026	9.2103	4.6052
S256WTS012	Codilean et al. 2022	20342		3.6904	6.5171	0.19774	0.3935	0.5835	4.1903	5.3032	5.5639	46.482	83.0322	121.534	4.8453	5.6526	5.7469	0.1246	0.2371	0.3397	5.011	3.8959	3.2633	-1.3171	0	1.0543	0.1921	-0.9314	0.1212	0.1973	1.2609	5.8796	5.7347	0.4713	1.7721	5.1041	3.3878	-2.4827	0.2934	0.3499	-0.3418	-0.2719	1.725	15.3363	9.364	4.2209	2.3026	9.2103	4.6052
S076WTS012	Codilean et al. 2022	1929.4		6.0459	6.3148	0.45849	0.6843	0.8417	4.4994	5.4678	5.6071	90.2258	130.832	174.335	5.6394	6.2791	6.562	0.3147	0.4792	0.6141	7.0936	5.3339	4.574	0.2694	37.027	59.1746	0.988	-2.3177	0.5436	0.2397	1.354	7.4925	7.785	3.2917	4.4998	7.2439	5.9063	1.5862	0.0429	0.0104	-0.567	-0.577	1.8474	88.8266	4.287	0	4.4941	9.2103	4.7395
S146WTS005	Codilean et al. 2022	5405.28		5.0157	5.905	0.39254	0.638	0.7537	3.81	5.0699	5.1581	53.6742	83.7108	104.629	4.4921	4.9232	5.2431	0.2259	0.3695	0.4614	7.398	4.9541	3.9669	0.8418	56.978	78.9725	1.6397	-2.6465	0.6978	0.2724	1.5114	7.7693	7.4474	2.8527	3.2078	7.1476	4.9919	2.135	-0.451	-0.303	-0.7985	-0.6516	1.6603	32.9696	6.668	3.7311	5.4958	9.2103	4.6751
S261WTS017	Codilean et al. 2022	2804.97		5.6717	6.0465	0.1329	0.2592	0.418	3.4904	4.8805	4.9337	21.8975	34.1376	45.1522	3.6209	4.0169	4.1557	0.0711	0.1248	0.178	5.687	4.0218	3.3378	-1.1588	20.668	11.5421	0.4011	-2.3719	0.2714	0.1417	1.0264	6.205	6.2649	-0.064	1.56	5.0501	3.5131	-1.5157	-1.1619	-1.0584	-1.7093	-1.6342	0.6622	2.3289	8.25	2.7564	4.3418	9.2103	5.4194
S023WTS019	Codilean et al. 2022	3901.1		5.3418	6.0823	0.04316	0.1658	0.3029	3.4269	4.9424	5.0709	19.6247	35.0025	57.2793	3.4083	3.7036	4.2149	0.0572	0.1011	0.2027	5.9449	3.922	3.2849	-0.9838	28.209	24.3056	0.7652	-2.5345	0.2859	0.1666	1.0868	6.2571	6.1638	-0.652	0.4904	4.8673	2.8803	-1.4312	-1.4627	-1.3042	-1.9283	-1.8282	0.4919	13.1969	6.398	1.1964	4.1151	9.2103	5.4377
S009WTS065	Codilean et al. 2022	83493.9		2.2783	5.6554	0.026	0.0491	0.0693	2.5327	4.6364	4.6406	2.7928	2.985	3.3473	2.6752	2.7813	2.8178	0.0122	0.0187	0.0249	6.4583	4.2766	3.5478	-0.147	4.016	21.3988	1.0814	-2.0272	0.618	0.2577	1.3064	6.7562	6.7866	1.2895	1.7408	5.9818	3.8762	0.6065	-1.4238	-1.287	-1.8579	-1.7608	0.4637	0	11.519	4.5151	2.3026	9.2103	4.6052
S283WTS033	Codilean et al. 2022	355.439		7.7375	5.675	0.46855	0.8072	1.0494	4.8553	5.6326	5.7534	101.342	145.872	200.713	5.9814	6.2993	6.65	0.3802	0.5985	0.7356	6.0928	4.668	3.7596	-0.0331	6.961	18.5864	0.5614	-1.9386	0.0837	0.2295	1.3463	6.5781	6.7285	2.5652	3.286	7.0452	5.2308	-0.7494	-0.7945	-0.7961	-1.3053	-1.3071	0.8953	50.8238	4.728	2.8443	7.0149	13.2241	6.0672
S283WTS031	Codilean et al. 2022	554.984		7.2919	5.675	0.46855	0.8072	1.0494	4.8553	5.6326	5.7534	101.342	145.872	200.713	5.9814	6.2993	6.65	0.3802	0.5985	0.7356	6.0928	4.668	3.7596	-0.0331	6.961	18.5864	0.5614	-1.9386	0.0837	0.2295	1.3463	6.5781	6.7285	2.5652	3.286	7.0452	5.2308	-0.7494	-0.7945	-0.7961	-1.3053	-1.3071	0.8953	50.8238	4.728	2.8443	7.0149	13.2241	6.0672
S283WTS032	Codilean et al. 2022	423.349		7.5626	5.675	0.46855	0.8072	1.0494	4.8553	5.6326	5.7534	101.342	145.872	200.713	5.9814	6.2993	6.65	0.3802	0.5985	0.7356	6.0928	4.668	3.7596	-0.0331	6.961	18.5864	0.5614	-1.9386	0.0837	0.2295	1.3463	6.5781	6.7285	2.5652	3.286	7.0452	5.2308	-0.7494	-0.7945	-0.7961	-1.3053	-1.3071	0.8953	50.8238	4.728	2.8443	7.0149	13.2241	6.0672
S082WTS005	Codilean et al. 2022	11027.1		4.3027	6.2823	0.18212	0.375	0.5366	3.7141	5.0319	5.2175	36.1405	61.8895	89.47	3.9263	4.6875	4.8579	0.1074	0.2114	0.3169	6.5791	4.4832	4.096	-1.2396	5.921	2.1813	0.7007	-2.1698	0.3117	0.1812	1.291	6.1738	6.2602	0.2585	1.0616	5.099	3.08	-1.4763	-0.4265	-0.3689	-0.9752	-0.9056	1.0665	60.318	5.678	3.2645	3.3797	9.2103	4.6384
S023WTS027	Codilean et al. 2022	5545.42		4.9901	5.9169	0.03644	0.0628	0.088	2.8257	4.6959	4.7069	7.1937	9.6028	11.4023	2.796	2.971	3.0006	0.0216	0.0327	0.0413	5.808	3.8508	3.2326	-1.3847	0.033	0	0.1975	-2.2091	0.1514	0.1679	1.0969	5.8848	5.9197	-1.2658	0.009	4.7725	2.7405	-2.2968	-1.6409	-1.4486	-1.9973	-1.8799	0.4602	0	6.264	0	3.5414	9.2103	5.2751
S038WTS023	Codilean et al. 2022	80523.7		2.3145	6.3693	0.0992	0.2235	0.3776	3.1357	4.7788	4.8457	15.0474	23.8682	37.6966	2.9701	3.1885	3.3701	0.0515	0.095	0.1635	5.7932	4.0688	3.385	-1.714	0	0	0.3279	-1.4632	0.1742	0.1429	1.1233	5.6956	5.7516	-1.5945	-0.2653	4.6905	2.5549	-2.6326	-1.8012	-1.779	-2.0915	-2.0794	0.2705	99.8278	3.106	0	2.3026	9.2103	4.6052
S182WTS021	Codilean et al. 2022	9270.76		4.4762	6.3374	0.32391	0.5119	0.616	3.9038	5.0356	5.0904	45.9906	65.9856	81.9213	4.6586	5.0117	5.2187	0.1635	0.2494	0.3054	7.4233	4.7248	4.2132	-0.1316	56.24	95.3772	1.3491	-2.4986	0.6191	0.2976	1.4081	7.0733	7.1949	2.2698	3.2769	6.3253	4.729	0.9713	-0.9509	-0.4158	-1.3318	-1.0718	0.8984	0	6.43	0	2.3026	9.2103	4.6052
S021WTS007	Codilean et al. 2022	45171.8		2.8926	1.9006	0.23854	0.3846	0.4861	4.1208	5.1499	5.1844	49.3601	68.2656	85.6741	5.1889	5.5765	5.7146	0.168	0.2583	0.3108	8.0216	5.108	4.5415	0.4369	90.644	17.104	1.5907	-2.7426	0.6527	0.2934	1.3759	7.7808	7.6551	1.378	2.2029	7.1471	5.4365	1.8869	-1.837	-1.8592	-2.0802	-2.0875	0.0566	94.0045	2.472	1.7682	2.3026	9.2103	4.6052
S156WTS020	Codilean et al. 2022	40162.6		3.0101	6.0393	0.19523	0.3367	0.4217	3.467	4.9208	4.9941	28.1165	46.8774	59.3753	4.0032	4.5589	4.6851	0.0993	0.1714	0.221	7.429	4.8333	4.2425	0.1078	99.866	97.4639	1.3132	-3.701	0.6669	0.2581	1.2424	7.2262	7.2116	2.3203	3.0323	6.5759	4.7312	1.2927	-1.5087	-1.5269	-1.9647	-1.9733	0.5134	100	2.062	0	4.6609	9.2103	4.6761
S086WTS001	Codilean et al. 2022	907.077		6.8006	6.2509	0.43028	0.667	0.8363	4.4704	5.4881	5.8015	81.3874	125.801	168.014	5.7832	6.2104	6.9435	0.2819	0.4607	0.5701	6.8131	5.4657	4.653	0.2263	30.612	67.0171	0.9905	-2.2538	0.545	0.2634	1.3116	7.5052	7.8208	3.6417	4.7867	7.6239	6.2393	1.5877	0.0306	0.0017	-0.5829	-0.5906	1.6827	97.7165	3.998	0	4.9023	9.4084	4.8099
S086WTS025	Codilean et al. 2022	789.747		6.9391	6.2509	0.43028	0.667	0.8363	4.4704	5.4881	5.8015	81.3874	125.801	168.014	5.7832	6.2104	6.9435	0.2819	0.4607	0.5701	6.8131	5.4657	4.653	0.2263	30.612	67.0171	0.9905	-2.2538	0.545	0.2634	1.3116	7.5052	7.8208	3.6417	4.7867	7.6239	6.2393	1.5877	0.0306	0.0017	-0.5829	-0.5906	1.6827	97.7165	3.998	0	4.9023	9.4084	4.8099
S207WTS005	Codilean et al. 2022	222.506		8.2059	5.6434	0.47238	0.7268	0.928	4.8546	5.5266	5.6232	99.051	140.431	181.885	5.7278	6.0893	6.3875	0.3858	0.553	0.6451	6.019	4.3302	3.4515	0.3558	22.332	35.8734	0.7817	-1.7743	0.2127	0.2628	1.3807	7.0449	6.7532	2.4088	3.1371	6.9245	5.1125	-0.0954	-0.7156	-0.6779	-1.2245	-1.1967	0.9616	33.9973	7.438	3.7039	6.5182	11.879	5.9842
S102WTS016	Codilean et al. 2022	25465.6		3.4657	6.1394	0.12455	0.2227	0.3244	3.1048	4.7658	4.8018	17.3532	26.3964	36.2641	3.1542	3.3816	3.473	0.0734	0.1238	0.1767	6.2318	3.9291	3.3595	-0.6029	0	0.0309	0.3227	-1.726	0.1805	0.233	1.336	6.2823	6.4463	0.5098	1.3321	5.2608	3.3096	-1.1734	-0.7677	-0.3592	-1.2417	-0.965	0.927	0	10.982	4.3811	4.1249	9.2103	5.8982
S164WTS031	Codilean et al. 2022	26177.3		3.4382	6.4761	0.18348	0.3762	0.5078	3.5308	5.0366	5.1767	35.7079	67.2438	90.2018	4.8062	5.516	5.9969	0.1124	0.2321	0.3327	8.9704	5.3654	4.6055	0.7956	74.777	94.635	1.5805	-2.6255	0.7004	0.265	1.2063	8.2817	8.2407	3.6763	5.1547	7.4747	6.4121	2.7869	-1.6205	-1.604	-1.9776	-1.9597	0.0633	100	2	0	2.3026	9.2103	4.6052
S261WTS045	Codilean et al. 2022	3039.42		5.5914	5.9821	0.1883	0.3588	0.4972	3.5739	4.8863	4.9227	27.0889	39.6553	50.76	3.4197	3.6112	3.652	0.0932	0.1503	0.1994	5.617	3.937	3.3015	-1.3025	6.095	6.1176	0.3366	-2.2653	0.2105	0.1492	1.0826	5.9835	6.086	-1.2553	0.0402	4.7663	2.7334	-1.9375	-1.0826	-0.9655	-1.6291	-1.5334	0.6866	0	8.444	3.477	3.9737	9.2103	5.4384
S018WTS011	Codilean et al. 2022	13818.9		4.077	5.5333	0.08652	0.2733	0.3689	3.1554	4.8037	4.8678	21.1122	32.2605	43.5606	3.7929	4.2211	4.5101	0.0767	0.13	0.1781	7.0919	4.5114	3.5929	0.5946	58.959	64.8134	1.1669	-2.6564	0.5982	0.2472	1.3292	7.2755	7.1775	1.9789	2.4703	6.6146	4.5723	1.4555	-0.9886	-0.983	-1.5219	-1.5123	0.5933	55.2971	5.324	3.1188	5.3726	9.2103	5.4755
S082WTS041	Codilean et al. 2022	772.073		6.9617	6.2976	0.3412	0.5795	0.6927	4.4381	5.3864	5.5003	67.9639	105.728	137.353	4.8618	5.31	5.5633	0.2231	0.3765	0.4573	7.0631	4.5181	4.0836	-0.9866	37.137	28.9022	0.9551	-2.1456	0.4359	0.245	1.3436	6.2964	6.8518	0.758	1.7939	5.3191	3.5319	-0.4523	-0.5466	-0.5567	-1.1286	-1.0859	1.049	10.2622	6.364	2.5504	4.3848	9.2103	4.8396
S023WTS032	Codilean et al. 2022	15361		3.9712	6.02	0.05152	0.0793	0.1534	2.9003	4.7105	4.7235	9.0743	12.0989	16.9053	2.81	2.9728	2.9938	0.0291	0.0426	0.0691	5.5932	3.9846	3.4414	-1.384	0	0	0.1921	-2.2109	0.1441	0.1604	1.1307	5.9183	5.7788	-2.1804	-0.462	4.6668	2.5758	-2.4362	-1.6205	-1.4469	-2.0114	-1.9119	0.5091	0	7.079	2.7945	3.3312	9.2103	5.1926
S009WTS026	Codilean et al. 2022	19750.4		3.7199	5.3301	0.07119	0.3789	0.4684	3.4588	4.868	4.9008	30.224	45.8198	58.0401	4.0205	4.2182	4.2677	0.1097	0.2007	0.2658	6.8925	4.5054	3.5747	0.674	96.817	95.8895	1.2554	-3.2861	0.6337	0.2839	1.4701	7.382	7.1605	1.5263	2.1221	6.3505	4.3887	1.594	-0.9994	-1.0136	-1.5233	-1.5316	0.5625	3.8833	6.806	0	5.0424	9.2103	5.3484
S023WTS003	Codilean et al. 2022	57630.8		2.649	5.9017	0.0565	0.0933	0.2156	3.1252	4.7803	4.814	14.5624	22.6093	35.2534	2.9756	3.2355	3.2565	0.0376	0.0598	0.1304	5.4707	4.0225	3.4006	-1.4899	0	0	0.2105	-2.2073	0.1595	0.1555	1.0776	5.8928	5.8419	-2.0099	-0.8164	4.6859	2.5181	-2.4226	-1.2651	-1.1135	-1.7964	-1.6879	0.7951	2.4779	10.023	3.8788	2.9741	9.2103	4.6949
S118WTS006	Codilean et al. 2022	241810		1.2149	6.2505	0.06102	0.1013	0.1655	3.1732	4.7821	4.8392	13.2105	18.172	25.5193	3.065	3.3209	3.4619	0.0397	0.0581	0.0877	6.4263	4.5976	4.059	-0.7604	4.913	6.1839	0.5678	-2.4361	0.3721	0.2329	1.1757	6.7023	6.643	-0.5465	0.3185	4.8601	2.7551	-0.6253	-1.5688	-1.5602	-1.8715	-1.865	0.0639	55.407	5.101	3.3816	2.3026	9.2103	4.6052
S269WTS011	Codilean et al. 2022	572.08		7.2615	5.327	0.53529	0.7909	0.9315	4.2981	5.283	5.3201	91.7807	131.172	152.405	5.6924	6.0798	6.243	0.394	0.621	0.7059	7.8308	5.353	4.2448	1.3344	3.33	15.2764	0.7066	-1.7862	0.2104	0.2842	1.5526	8.1911	7.7757	3.2514	3.8	7.9244	5.963	1.5215	-0.4438	-0.3402	-0.8005	-0.7103	1.4301	13.4989	6.346	2.75	6.8683	9.8091	5.7399
S118WTS007	Codilean et al. 2022	273456		1.0919	6.2505	0.06102	0.1013	0.1655	3.1732	4.7821	4.8392	13.2105	18.172	25.5193	3.065	3.3209	3.4619	0.0397	0.0581	0.0877	6.4263	4.5976	4.059	-0.7604	4.913	6.1839	0.5678	-2.4361	0.3721	0.2329	1.1757	6.7023	6.643	-0.5465	0.3185	4.8601	2.7551	-0.6253	-1.5688	-1.5602	-1.8715	-1.865	0.0639	55.407	5.101	3.3816	2.3026	9.2103	4.6052
S188WTS034	Codilean et al. 2022	15087.9		3.9892	6.4681	0.35871	0.6437	0.7685	4.6075	5.5426	5.6841	79.0314	128.432	172.431	5.543	6.1722	6.369	0.2461	0.4259	0.538	4.8043	4.1805	3.4849	-1.2353	3.236	1.0967	0.3473	-1.6482	0.1947	0.2115	1.2483	5.7873	5.9474	1.8202	2.9993	5.8897	4.3804	-2.0463	-0.037	-0.0446	-0.5964	-0.6075	1.6955	77.355	4.138	1.3796	2.3026	9.2103	4.6052
S072WTS007	Codilean et al. 2022	11941.7		4.223	6.0383	0.4846	0.7121	0.8252	4.7138	5.6064	5.6976	89.0161	121.312	158.544	5.3257	5.7432	6.0518	0.3397	0.5118	0.585	4.7226	3.76	3.2495	-1.5004	0.015	25.9023	0	-1.3064	0.0513	0.2664	1.4275	5.3645	5.6586	1.0325	2.2019	5.5986	4.009	-2.8699	-0.6597	-0.6246	-1.1549	-1.1236	1.1412	99.9854	2.036	0	6.2681	11.309	6.1266
S026WTS012	Codilean et al. 2022	92497.2		2.1759	5.8442	0.125	0.2271	0.3247	3.059	4.7883	4.8183	17.6658	29.1396	38.9546	3.6768	4.0679	4.269	0.0657	0.1052	0.1767	6.9404	4.5487	3.9812	0.0067	77.332	64.5045	1.1012	-3.3581	0.5506	0.2873	1.4762	7.0038	7.0087	1.9656	3.2222	6.4057	5.0497	0.7385	-1.9805	-1.9878	-2.1698	-2.1742	0.2061	2.0034	6.076	1.6797	4.7287	9.2103	5.3776
S182WTS037	Codilean et al. 2022	12575.6		4.1713	6.282	0.26986	0.4285	0.5272	3.8427	5.0111	5.0859	41.3643	56.9046	71.5025	4.5487	4.8368	5.05	0.1446	0.224	0.2712	7.5116	4.7657	4.3092	-0.0612	47.276	87.9086	1.4577	-2.4281	0.6094	0.321	1.5069	7.1555	7.2174	2.2946	3.2999	6.3845	4.7929	1.019	-1.1202	-0.4195	-1.4788	-1.1552	1.3457	0	6.534	0	2.3026	9.2103	4.6052
S149WTS032	Codilean et al. 2022	8863.39		4.5211	6.4612	0.19068	0.3395	0.4556	3.6307	5.056	5.1468	33.5278	58.8085	81.4068	4.5453	5.074	5.3884	0.1119	0.1994	0.2789	8.9865	5.5878	4.7262	0.64	33.05	87.857	1.3805	-2.3086	0.5843	0.3055	1.5006	7.991	7.6529	3.2438	3.987	7.084	5.2921	1.8616	-0.5468	-0.3767	-1.0921	-0.9329	1.1639	100	3.242	0	2.3026	9.2103	4.6052
S283WTS030	Codilean et al. 2022	660.989		7.1171	5.5827	0.45739	0.791	1.0299	4.8294	5.624	5.6973	99.3659	143.793	195.238	5.9889	6.3041	6.6542	0.3716	0.5834	0.7159	6.1692	4.6836	3.7756	-0.0436	5.745	18.5728	0.5655	-1.9241	0.0778	0.2295	1.3463	6.5646	6.7414	2.4674	3.1889	7.0179	5.2032	-0.7617	-0.8228	-0.8251	-1.3318	-1.3341	0.8953	48.7148	4.864	2.8748	7.0442	13.2846	6.0721
S139WTS024	Codilean et al. 2022	16610.3		3.893	5.6271	0.23272	0.3837	0.4492	3.6373	4.9269	4.9574	34.2515	47.7937	60.7402	3.9259	4.1214	4.1557	0.1269	0.1948	0.2325	6.9809	4.5264	3.8475	-0.0021	51.099	76.107	1.2256	-2.6971	0.6203	0.2684	1.3787	6.9817	6.9862	1.559	1.9475	6.207	4.0609	0.8942	-1.2798	-1.2939	-1.7585	-1.7626	0.47	100	2	0	4.0302	9.2103	4.6259
S037WTS033	Codilean et al. 2022	1070.87		6.6346	5.5623	0.53293	0.8298	1.0268	4.7247	5.487	5.6143	100.708	146.033	204.292	5.9345	6.2985	6.5464	0.3882	0.6098	0.7186	6.5871	4.8483	3.9233	0.3951	24.688	44.0917	0.8324	-1.9711	0.3004	0.2689	1.4372	7.1127	7.3874	3.0377	3.7413	7.5628	5.7464	0.7071	-1.0564	-1.055	-1.5441	-1.5437	0.8497	91.4247	4.05	2.2355	6.5011	9.8524	5.8937
S037WTS034	Codilean et al. 2022	653.295		7.1288	5.5623	0.53293	0.8298	1.0268	4.7247	5.487	5.6143	100.708	146.033	204.292	5.9345	6.2985	6.5464	0.3882	0.6098	0.7186	6.5871	4.8483	3.9233	0.3951	24.688	44.0917	0.8324	-1.9711	0.3004	0.2689	1.4372	7.1127	7.3874	3.0377	3.7413	7.5628	5.7464	0.7071	-1.0564	-1.055	-1.5441	-1.5437	0.8497	91.4247	4.05	2.2355	6.5011	9.8524	5.8937
S062WTS005	Codilean et al. 2022	12681.3		4.1629	5.2667	0.07722	0.1613	0.2148	2.9514	4.733	4.7504	12.2458	17.8795	21.4961	3.4115	3.5749	3.7005	0.0478	0.0747	0.0903	6.7538	4.2142	3.3855	0.4286	58.181	60.4781	1.2035	-2.5876	0.5862	0.2748	1.4719	7.0728	6.9459	1.5186	2.1578	6.3791	4.4573	1.099	-1.9697	-1.9654	-2.1286	-2.1253	0.2977	14.4556	5.308	2.8189	4.3009	9.2103	4.8823
S104WTS016	Codilean et al. 2022	264.645		8.0324	6.1061	0.5551	0.7919	0.9605	4.8845	5.5966	5.6852	109.782	148.485	195.171	5.7941	6.1811	6.3482	0.3818	0.5703	0.6583	6.831	4.6715	3.9483	0.0686	12.946	27.2102	0.297	-2.3903	0.1917	0.244	1.291	7.0229	7.2448	2.2064	3.1276	6.4328	4.7688	0.0525	-0.2025	-0.261	-0.8077	-0.8454	1.6209	68.7705	2.783	0	6.4027	12.6037	5.9653
S188WTS019	Codilean et al. 2022	30879.1		3.273	6.4141	0.3291	0.5914	0.6916	4.6005	5.4163	5.566	70.7227	104.016	147.357	5.48	5.8911	6.0655	0.22	0.3423	0.4119	4.6201	3.9805	3.1724	-1.5343	0	0	0.1996	-1.6378	0.1348	0.2102	1.2351	5.5583	5.7926	1.2045	2.6309	5.5122	4.1047	-2.5631	0.1306	0.1443	-0.4649	-0.4488	1.8701	61.6831	4.824	3.2109	2.3026	9.2103	4.6052
S021WTS012	Codilean et al. 2022	44312.1		2.9118	6.4469	0.25015	0.4131	0.5518	4.01	5.1525	5.2895	46.1925	70.8451	97.5222	5.2083	5.6753	5.9094	0.1431	0.2512	0.3227	8.1175	5.09	4.5138	0.3211	87.318	20.2333	1.4996	-2.7121	0.6623	0.2852	1.3763	7.6427	7.5574	3.1872	3.853	7.0436	5.177	1.7399	-1.8669	-1.8618	-2.0915	-2.0915	0.054	98.1887	2.068	0.2055	2.3026	9.2103	4.6052
S137WTS005	Codilean et al. 2022	1874.2		6.0749	5.5767	0.33411	0.6024	0.7644	3.8771	5.032	5.0964	54.466	84.4493	104.545	4.4175	4.7063	4.8037	0.2459	0.4368	0.5368	6.8748	4.5289	3.6511	0.3127	46.522	53.3466	1.2765	-2.5232	0.5573	0.2844	1.4221	7.2082	7.2119	1.9403	2.4176	6.5543	4.4973	1.1635	-0.9907	-0.9902	-1.4872	-1.4872	0.8587	0	9.68	3.7802	5.5055	9.2103	5.4109
S127WTS017	Codilean et al. 2022	11646.4		4.2481	6.3429	0.275	0.4911	0.6143	3.9591	5.1012	5.2357	49.7018	76.1973	106.103	4.4139	4.8034	5.073	0.1604	0.2689	0.3464	6.6228	4.1227	3.6621	-0.7911	0.217	0	0.288	-1.7037	0.2014	0.2377	1.3413	6.506	6.4448	1.1528	2.5441	5.5176	4.0832	-1.2636	-0.895	-0.863	-1.3333	-1.3042	1.2137	0	7.582	0	2.3026	9.2103	4.6052
S188WTS042	Codilean et al. 2022	23841.4		3.5316	6.3223	0.20424	0.3859	0.528	4.1779	5.2826	5.5051	47.3516	69.9259	111.183	3.558	3.8971	4.0862	0.1378	0.231	0.3084	6.266	3.8566	3.2887	-1.6194	0	0.8587	0.1064	-1.597	0.1052	0.1893	1.1914	5.5255	5.2772	-4.1352	-2.0099	4.608	2.3504	-3.1472	0.2655	0.3133	-0.3002	-0.2501	1.293	71.1643	5.687	3.3649	2.9462	9.2103	4.677
S104WTS014	Codilean et al. 2022	426.263		7.5558	6.0766	0.5723	0.8017	0.9938	4.8562	5.5222	5.6022	115.038	156.757	193.023	5.7083	6.049	6.1618	0.3913	0.5829	0.6772	6.7084	4.7049	4.036	0.0276	42.346	44.9877	0.9777	-2.4722	0.3873	0.2127	1.3064	7.1179	7.1154	2.166	3.0614	6.4191	4.7303	0.4202	-0.1798	-0.2472	-0.7855	-0.8347	1.6161	72.2506	3.9	0	5.615	9.3496	5.6906
S086WTS013	Codilean et al. 2022	299.413		7.909	6.1353	0.53339	0.7898	1.0008	4.8686	5.562	5.7037	112.398	159.63	206.977	5.9718	6.3201	6.6084	0.387	0.5915	0.7599	5.0252	4.5575	3.8233	-0.4564	3.922	10.315	0.3277	-1.8806	0.0963	0.2647	1.4242	6.4079	7.1809	3.0671	4.2812	7.1746	5.8395	-0.6512	-0.0961	-0.1095	-0.7154	-0.7036	1.5302	99.7153	3.473	0.2504	6.3018	12.8628	5.9856
S151WTS028	Codilean et al. 2022	208.82		8.2693	6.2365	0.52497	0.7349	0.8814	4.6648	5.4173	5.5001	98.7259	133.611	176.143	5.9898	6.3798	6.5008	0.3303	0.4777	0.5715	8.3019	5.7726	4.7963	1.0837	89.841	80.4818	1.5533	-2.7031	0.7217	0.3318	1.4465	7.9576	7.9384	3.3578	4.1856	7.3671	5.6657	2.8028	-0.2173	-0.2416	-0.6394	-0.658	2.2401	44.2028	3.121	0	4.8375	9.2103	4.6241
S151WTS029	Codilean et al. 2022	125.866		8.7756	6.2365	0.52497	0.7349	0.8814	4.6648	5.4173	5.5001	98.7259	133.611	176.143	5.9898	6.3798	6.5008	0.3303	0.4777	0.5715	8.3019	5.7726	4.7963	1.0837	89.841	80.4818	1.5533	-2.7031	0.7217	0.3318	1.4465	7.9576	7.9384	3.3578	4.1856	7.3671	5.6657	2.8028	-0.2173	-0.2416	-0.6394	-0.658	2.2401	44.2028	3.121	0	4.8375	9.2103	4.6241
S140WTS008	Codilean et al. 2022	778.416		6.9536	6.1545	0.45168	0.6909	0.8198	4.8097	5.5031	5.9208	97.9613	131.708	168.943	6.025	6.4572	6.8257	0.3272	0.4808	0.5688	7.1761	5.4246	4.6475	0.5826	70.994	79.1083	0.9787	-2.8285	0.5966	0.2504	1.3976	7.8098	8.007	3.0844	4.2103	7.176	5.7554	2.1535	-0.2491	-0.1442	-0.7655	-0.6927	1.3195	99.4267	2.086	0.4532	4.9212	9.2103	4.9594
S186WTS006	Codilean et al. 2022	129144		1.8421	5.8288	0.03048	0.0626	0.0987	2.6211	4.6622	4.6822	5.5218	7.9295	13.9475	3.0617	3.3199	3.4431	0.0157	0.0232	0.0349	7.5546	4.8748	4.2021	-0.1082	81.33	50.1298	1.1114	-3.4173	0.5869	0.2549	1.4367	7.0227	7.0974	1.7964	2.5489	6.276	4.4463	0.8216	-1.7545	-1.6089	-2.0956	-2.0265	0.2513	46.0052	4.674	0	2.3026	9.2103	4.6052
S206WTS002	Codilean et al. 2022	6931.78		4.7669	6.0839	0.22296	0.4662	0.6187	3.9486	5.1251	5.1816	42.8359	72.8169	90.1825	3.6293	3.9466	3.9974	0.1279	0.239	0.3469	5.4428	4.1671	3.6676	-1.7151	0	0	0.2831	-2.1507	0.2185	0.1726	1.215	5.4881	5.2876	-2.0794	-1.1489	4.6704	2.4404	-2.9159	0.0426	0.0397	-0.4987	-0.4787	1.2374	0	8.395	3.1418	3.1519	9.2103	4.6837
S149WTS034	Codilean et al. 2022	14525.8		4.0271	6.3848	0.25057	0.4075	0.5458	3.9393	5.124	5.2011	45.6219	71.797	93.5114	4.7434	5.3697	5.5481	0.1562	0.2508	0.3398	8.7703	5.5998	4.7374	0.7187	57.124	91.0826	1.4506	-2.4746	0.6194	0.3056	1.3602	8.0141	7.724	3.0673	3.7189	6.983	5.101	2.074	-0.4447	-0.3205	-0.9932	-0.8739	1.253	100	3.949	0	2.3026	9.2103	4.6052
S159WTS002	Codilean et al. 2022	768774		0.0583	6.4091	0.04626	0.0883	0.1413	3.0692	4.7671	4.8065	12.4896	18.693	27.54	3.1991	3.4283	3.5365	0.0262	0.0425	0.0642	7.3827	4.3194	3.8103	-0.5929	18.91	7.1136	0.7201	-2.1991	0.389	0.2216	1.1957	6.8059	6.7998	-0.2009	1.0889	4.913	3.0373	-0.319	-1.2903	-1.1313	-1.7904	-1.6634	0.4861	83.8233	3.647	0	2.3026	9.2103	4.6052
S104WTS022	Codilean et al. 2022	2261.16		5.8872	6.0303	0.5141	0.7166	0.8973	4.7771	5.443	5.4945	103.304	138.331	172.385	5.5585	5.8738	5.9024	0.3572	0.4943	0.5825	6.8428	4.7229	4.1066	-0.0261	35.212	39.6321	0.977	-2.418	0.3962	0.2115	1.2567	7.0793	7.2512	2.2599	3.1852	6.5302	4.8783	0.5189	-0.1903	-0.2631	-0.7983	-0.8512	1.6024	97.6005	3.279	0	5.6788	9.4275	5.6957
S121WTS025	Codilean et al. 2022	6814.11		4.7841	5.4007	0.40491	0.6273	0.7539	3.798	5.0228	5.126	61.2682	91.4064	122.551	4.541	4.9645	5.1633	0.2611	0.4034	0.5211	6.8276	4.4037	3.607	0.5066	68.079	81.912	1.0395	-2.7016	0.5138	0.2829	1.3494	7.1952	7.0869	1.9578	2.6709	6.6773	4.8396	1.0907	-0.8496	-0.8221	-1.3791	-1.361	0.7457	28.7057	8.728	4.112	5.4339	9.2103	5.6449
S261WTS016	Codilean et al. 2022	2754.72		5.6898	5.8421	0.14079	0.2695	0.4287	3.5013	4.8778	4.9299	22.5448	34.6006	45.1451	3.6685	4.0274	4.17	0.074	0.1275	0.1804	5.6812	4.0218	3.3378	-1.1472	24.316	13.5162	0.4118	-2.4035	0.2796	0.1417	1.0264	6.2086	6.2923	-0.4216	1.1288	4.9827	3.3312	-1.462	-1.1511	-1.039	-1.7005	-1.6185	0.6645	2.7383	8.402	2.8313	4.3819	9.2103	5.4384
S104WTS011	Codilean et al. 2022	3223.11		5.5327	6.0296	0.4995	0.7017	0.8308	4.503	5.2985	5.4022	89.2843	115.354	145.122	5.3214	5.6184	5.8107	0.3242	0.4487	0.5276	7.0215	4.9466	4.3905	0.0541	45.607	57.0128	1.1739	-2.4169	0.5356	0.2261	1.349	7.309	7.3829	2.2423	3.4538	6.5157	5.1295	1.0564	-0.236	-0.3404	-0.9009	-0.9668	1.6063	49.3098	5.755	2.7665	4.6162	9.2103	4.7663
S023WTS030	Codilean et al. 2022	18916		3.7631	5.8993	0.09312	0.1966	0.2897	3.5361	4.9522	5.0715	22.8334	37.4825	57.7039	3.2634	3.5529	3.6988	0.0647	0.1313	0.1759	5.9542	3.9641	3.428	-1.1602	25.682	23.6571	0.5706	-2.4877	0.2404	0.1676	1.1163	6.1317	5.8626	-1.7661	-0.3842	4.7089	2.6205	-1.9426	-1.4749	-1.3049	-1.9449	-1.8395	0.5459	42.7011	4.834	1.9487	3.514	9.2103	5.3094
S156WTS022	Codilean et al. 2022	60184.6		2.6056	5.9137	0.20145	0.3401	0.4336	3.2631	4.8526	4.93	25.0602	40.4923	55.9015	4.218	4.6132	4.9704	0.0966	0.1548	0.2174	7.7471	4.948	4.2492	0.3785	97.532	94.3433	1.3937	-3.4835	0.6571	0.2647	1.3736	7.5477	7.5587	2.657	3.3288	6.9624	5.0987	1.7712	-1.3795	-1.3931	-1.8534	-1.863	0.5305	97.478	2	0	4.7478	9.2103	4.6127
S188WTS036	Codilean et al. 2022	22884		3.5726	6.3545	0.3547	0.6396	0.7776	4.644	5.5665	5.6528	78.1499	126.787	175.678	5.5467	6.0626	6.1585	0.2501	0.4302	0.5476	4.6893	4.1497	3.3905	-1.3704	1.917	9.005	0.3858	-1.5329	0.1939	0.1855	1.2063	5.6594	6.059	1.9089	3.3252	6.028	4.7598	-2.0557	0.0742	0.1226	-0.5123	-0.4657	1.7666	67.4708	5.534	2.6776	2.3026	9.2103	4.6052
S038WTS031	Codilean et al. 2022	119312		1.9213	6.2098	0.0242	0.0354	0.0544	2.8158	4.7127	4.7293	7.2467	11.7689	13.9452	2.9337	3.2724	3.3066	0.0133	0.0174	0.0272	6.1858	4.1783	3.6654	-1.4056	0.222	0.2088	0.3947	-1.982	0.2598	0.1377	1.0859	6.1272	6.2386	-0.4095	0.9159	4.9018	3.0347	-1.7567	-1.739	-1.6165	-2.0739	-2.0122	0.2705	94.3416	2.752	1.8959	2.3026	9.2103	4.6052
S127WTS037	Codilean et al. 2022	20316.6		3.6916	6.266	0.27767	0.4645	0.5707	3.9219	5.0505	5.0986	50.4357	71.4259	85.2805	4.1544	4.4382	4.5284	0.1803	0.2707	0.3196	6.4266	4.7754	4.3509	-0.7527	52.797	36.299	0.8046	-2.4499	0.4807	0.2428	1.3634	6.5464	6.6384	0.7839	1.7403	5.3463	3.5128	-0.3402	-0.6105	-0.6214	-1.2097	-1.2036	1.0433	0	7.721	0	2.3026	9.2103	4.6052
S183WTS012	Codilean et al. 2022	2075.12		5.973	6.0686	0.60423	0.7351	0.888	4.9551	5.6763	5.9074	115.865	162.516	224.447	6.5284	6.9872	7.5249	0.3765	0.5572	0.6498	6.8424	5.1313	4.4639	0.1351	47.712	41.4665	1.076	-2.4913	0.4255	0.2333	1.3153	7.2391	7.9442	3.5693	4.7513	7.6982	6.3522	1.3125	0.0168	-0.0713	-0.6051	-0.6646	1.6369	100	3.792	0	6.2156	11.3159	5.3215
S147WTS001	Codilean et al. 2022	235.94		8.1472	5.5621	0.60103	0.8952	1.1134	4.3322	5.2767	5.3715	107.597	154.568	193.369	5.8834	6.4544	6.7097	0.4316	0.6614	0.7798	8.4694	5.5755	4.4244	1.4415	18.177	41.1707	1.0962	-2.5035	0.3492	0.2761	1.5616	8.231	8.3782	3.7697	4.2636	8.2678	6.2558	2.4817	-0.29	-0.2169	-0.7087	-0.6489	1.5119	76.549	3.467	2.6418	7.1557	12.2723	5.5215
S009WTS014	Codilean et al. 2022	29926.6		3.3043	5.3231	0.1309	0.2707	0.3374	3.4984	4.8924	4.9283	29.6814	43.4451	52.6434	3.8842	4.2399	4.2585	0.1242	0.1928	0.2359	6.713	4.4223	3.572	0.5364	74.531	90.5741	1.2388	-2.8647	0.5613	0.2805	1.331	7.1582	7.1199	1.3773	2.2876	6.2326	4.5393	1.2655	-1.9352	-1.9414	-2.1261	-2.1278	0.3853	99.7495	2	0	5.5429	9.2103	5.6042
S023WTS036	Codilean et al. 2022	31994.5		3.2375	5.8568	0.09746	0.1678	0.2896	3.3288	4.908	5.0241	18.6483	32.0783	46.4892	2.9105	3.1855	3.466	0.0563	0.1073	0.1674	5.6358	3.9651	3.4392	-1.2427	17.354	20.4304	0.4495	-2.3838	0.2158	0.1595	1.0794	6.0524	5.9206	-1.7545	-0.3538	4.7135	2.6383	-2.0199	-1.5334	-1.3728	-1.9834	-1.8905	0.5435	18.1154	5.661	2.5082	3.4571	9.2103	5.2681
S283WTS027	Codilean et al. 2022	411.016		7.5922	5.4144	0.4401	0.7662	1.0054	4.7605	5.5837	5.6541	95.5153	137.138	178.768	5.9449	6.2907	6.6217	0.3557	0.5469	0.6837	6.1692	4.6836	3.7756	-0.0487	4.769	18.7071	0.5708	-1.9058	0.0727	0.2295	1.3463	6.5557	6.7533	2.3831	3.1049	7.0498	5.2366	-0.7687	-0.8228	-0.8251	-1.3318	-1.3341	0.8869	46.0417	5.079	2.914	7.0746	13.3136	6.0804
S283WTS028	Codilean et al. 2022	440.063		7.5239	5.4144	0.4401	0.7662	1.0054	4.7605	5.5837	5.6541	95.5153	137.138	178.768	5.9449	6.2907	6.6217	0.3557	0.5469	0.6837	6.1692	4.6836	3.7756	-0.0487	4.769	18.7071	0.5708	-1.9058	0.0727	0.2295	1.3463	6.5557	6.7533	2.3831	3.1049	7.0498	5.2366	-0.7687	-0.8228	-0.8251	-1.3318	-1.3341	0.8869	46.0417	5.079	2.914	7.0746	13.3136	6.0804
S256WTS007	Codilean et al. 2022	67236		2.4949	6.2219	0.24312	0.4415	0.5746	4.2574	5.2852	5.3617	50.6053	80.9207	110.004	4.3025	4.6628	4.6876	0.1436	0.2421	0.3207	5.3431	3.6812	2.9999	-1.9722	0	0	0.1229	-0.8322	0.102	0.1762	1.09	5.1355	5.3144	-1.7093	-0.3299	4.6908	2.5684	-3.3926	0.3186	0.3263	-0.2279	-0.2236	1.3076	13.6523	9.479	3.9863	2.3026	9.2103	4.6052
S097WTS015	Codilean et al. 2022	18946.8		3.7614	5.3306	0.3116	0.5283	0.7242	3.7539	5.0114	5.0985	51.7203	81.711	109.421	4.5981	5.047	5.2076	0.2158	0.3347	0.4634	7.3668	4.6149	3.6627	0.6521	50.148	50.4096	1.1648	-2.6479	0.5524	0.2817	1.4061	7.4046	7.5272	2.6109	3.0546	7.3133	5.2432	1.6798	-0.9897	-0.8841	-1.5024	-1.4288	0.6729	0	8.966	3.7653	5.6811	9.2103	5.5905
S164WTS032	Codilean et al. 2022	21062.3		3.6556	6.2687	0.17052	0.3635	0.5062	3.6516	5.0865	5.2431	34.3844	68.6408	90.8202	4.8838	5.6182	5.855	0.1017	0.213	0.3079	9.0363	5.3992	4.5982	0.7982	68.459	86.8378	1.5551	-2.5627	0.6821	0.2666	1.2455	8.2692	8.2161	3.4498	4.9191	7.428	6.3545	2.7201	-1.622	-1.6119	-1.9812	-1.969	0.0615	100	2	0	2.3026	9.2103	4.6052
S037WTS024	Codilean et al. 2022	1571.62		6.251	5.3817	0.5222	0.7342	0.8713	4.1941	5.2013	5.2444	89.9041	123.148	150.021	5.2491	5.6067	5.9028	0.3455	0.5015	0.5816	7.2809	5.0179	4.1616	0.349	35.431	79.9232	1.03	-2.3076	0.4628	0.281	1.4563	7.2072	7.6392	2.7649	3.3908	7.4251	5.531	1.3112	-1.2396	-1.2245	-1.6863	-1.6729	0.6662	99.0731	2.394	0.2601	5.6728	9.2103	5.5643
S037WTS025	Codilean et al. 2022	1871.23		6.0765	5.3817	0.5222	0.7342	0.8713	4.1941	5.2013	5.2444	89.9041	123.148	150.021	5.2491	5.6067	5.9028	0.3455	0.5015	0.5816	7.2809	5.0179	4.1616	0.349	35.431	79.9232	1.03	-2.3076	0.4628	0.281	1.4563	7.2072	7.6392	2.7649	3.3908	7.4251	5.531	1.3112	-1.2396	-1.2245	-1.6863	-1.6729	0.6662	99.0731	2.394	0.2601	5.6728	9.2103	5.5643
S188WTS016	Codilean et al. 2022	32273.3		3.2288	6.2599	0.31026	0.5385	0.6393	4.5951	5.4461	5.5764	69.6454	101.088	149.098	5.3487	5.6626	5.7062	0.2005	0.3091	0.371	4.7359	3.7496	3.1136	-1.3997	0	0	0.2753	-0.9629	0.1438	0.1989	1.1705	5.7377	5.6408	0.5475	1.8292	5.2314	3.5798	-2.5673	0.1693	0.1658	-0.4435	-0.448	1.881	65.2777	4.911	2.5491	2.3026	9.2103	4.6052
S072WTS009	Codilean et al. 2022	24545.2		3.5025	5.5963	0.4425	0.6639	0.7349	4.688	5.4764	5.5328	82.4388	110.904	141.919	5.3921	5.7925	6.0376	0.3155	0.4765	0.5413	4.7244	3.6988	3.1617	-1.5749	0	20.666	0	-1.1907	0.067	0.2776	1.4321	5.3371	5.5349	1.0442	2.2246	5.8343	4.3152	-2.9918	-0.682	-0.6834	-1.1806	-1.1809	1.2577	89.4118	2.67	0.4674	5.3498	9.5187	6.068
S271WTS031	Codilean et al. 2022	4027.98		5.3098	6.2335	0.40455	0.6495	0.7584	4.4389	5.3015	5.3939	73.271	103.387	131.108	5.5549	6.0411	6.3116	0.2446	0.3658	0.4301	7.6979	4.9997	4.3382	0.3934	92.333	96.1316	1.6112	-2.7334	0.6955	0.2621	1.3064	7.7319	7.9445	3.533	4.2375	7.5344	5.7182	2.2135	-0.111	-0.1308	-0.6445	-0.6718	1.376	46.002	5.84	3.1699	2.3026	9.2103	4.6052
S025WTS049	Codilean et al. 2022	1875.96		6.0739	6.2199	0.63166	0.8139	0.9835	5.0586	5.7055	5.7909	126.755	180.721	247.15	5.493	5.9048	6	0.3868	0.5604	0.6764	7.3504	4.4276	3.9731	-0.3667	33.663	27.933	0.9803	-2.1884	0.381	0.2721	1.4045	6.795	7.0623	0.7538	1.9488	5.3506	3.6926	0.0577	-0.6677	-0.6998	-1.1338	-1.1584	1.2084	20.7551	5.514	0	5.2453	10.4306	4.8521
S261WTS031	Codilean et al. 2022	3139.42		5.559	5.7471	0.12543	0.2347	0.4018	3.4397	4.8907	4.9124	21.4366	34.1352	44.0727	3.3699	3.6389	3.6854	0.0696	0.1213	0.1831	5.6427	3.9756	3.2686	-1.1963	14.194	8.7743	0.3621	-2.2936	0.2622	0.1493	1.0715	6.1584	6.2326	-0.6274	0.7756	4.9417	3.1595	-1.596	-1.2673	-1.1279	-1.7579	-1.6613	0.6373	2.398	8.97	3.1024	4.2165	9.2103	5.3945
S062WTS010	Codilean et al. 2022	19914.5		3.7116	5.0371	0.08902	0.1632	0.2166	2.9804	4.7368	4.7527	12.378	17.9467	21.5415	3.4482	3.5805	3.717	0.0479	0.0751	0.0907	6.7538	4.2142	3.3855	0.4406	58.527	61.5403	1.2039	-2.6091	0.5863	0.2748	1.4719	7.0826	6.952	1.5186	2.1578	6.5013	4.5868	1.1137	-1.9697	-1.9654	-2.1286	-2.1253	0.2986	16.7172	5.338	2.8359	4.3009	9.2103	4.9203
S026WTS017	Codilean et al. 2022	40562.5		3.0002	5.6413	0.05597	0.1055	0.155	2.6565	4.682	4.7041	8.642	13.8935	17.4	3.0453	3.3019	3.4613	0.0268	0.0476	0.0678	7.5772	4.789	4.1399	0.0034	63.77	22.0154	0.9513	-2.9662	0.5551	0.2802	1.4793	7.0897	7.2113	1.9462	2.9265	6.519	4.9172	0.9214	-1.6175	-1.4045	-2.0843	-1.974	0.33	41.421	7.449	4.0203	3.9766	9.2103	5.0675
S143WTS019	Codilean et al. 2022	4406.77		5.2199	5.4314	0.17896	0.3227	0.4048	3.1888	4.8292	4.8625	22.6418	34.2251	42.3134	3.7083	4.1176	4.1859	0.0935	0.1496	0.1857	7.7435	4.6425	3.9755	-0.3562	39.615	45.8845	1.0888	-2.3528	0.5157	0.2505	1.4065	6.6602	6.7959	1.7879	2.1687	6.5121	4.3687	0.1883	-1.075	-0.8958	-1.5279	-1.3943	0.597	0	12	4.6151	2.3026	9.2103	4.6052
S127WTS011	Codilean et al. 2022	107083		2.0295	6.1876	0.15529	0.3349	0.4489	3.4641	4.8936	4.9466	26.5835	43.6216	59.9388	3.8598	4.2364	4.2502	0.0858	0.1597	0.2204	6.0005	4.3276	3.8157	-0.6848	0.077	0.0224	0.4253	-1.9414	0.2268	0.2277	1.3171	6.6798	6.5796	0.9034	2.0459	5.4477	3.7872	-1.0008	-1.1041	-0.9924	-1.5371	-1.4393	1.1533	0	6.402	0	2.3026	9.2103	4.6052
S127WTS025	Codilean et al. 2022	52847		2.7357	6.1713	0.20383	0.3784	0.4773	3.7102	4.9815	5.0366	35.8639	54.4323	68.0239	4.057	4.3925	4.4029	0.1232	0.2062	0.2551	5.9754	4.0753	3.6244	-1.0292	0.405	0.0798	0.3402	-1.9966	0.2099	0.2406	1.3544	6.263	6.3103	0.4706	1.9456	5.2297	3.7207	-1.5383	-0.8773	-0.8117	-1.3258	-1.2662	1.15	4.6904	7.524	0	2.3026	9.2103	4.6052
S265WTS006	Codilean et al. 2022	13179.7		4.1244	5.7116	0.30787	0.5167	0.5975	3.5959	4.9244	5.0219	42.4734	59.8005	73.6697	4.2672	4.571	4.9017	0.1743	0.2633	0.3062	7.9926	5.2378	4.4332	0.4106	87.814	99.576	1.1381	-3.7854	0.5517	0.2835	1.5531	7.2699	7.3413	2.0777	3.1847	6.587	5.1095	1.3345	-1.3606	-1.3645	-1.7649	-1.7678	0.2085	100	2	0	4.6429	9.2103	5.4847
S235WTS018	Codilean et al. 2022	48076.7		2.8303	5.9661	0.17644	0.4086	0.5441	3.804	5.1132	5.2437	39.9108	71.0109	109.698	3.1875	3.5574	3.6955	0.1339	0.2801	0.3676	5.8531	4.1576	3.4414	-1.5666	0	0.519	0.1823	-1.039	0.1547	0.1627	1.194	5.8413	6.0636	-2.4418	-0.137	4.6536	2.6783	-2.3035	-0.0807	-0.0127	-0.6268	-0.5558	1.4539	0	9.748	3.8693	4.574	9.2103	4.6463
S183WTS007	Codilean et al. 2022	1723.49		6.1587	5.9854	0.6199	0.7384	0.889	5.0098	5.6871	5.9236	119.461	167.052	227.531	6.5802	7.1606	7.5251	0.3843	0.5614	0.6544	6.8424	5.0579	4.4213	0.1033	47.275	40.7565	1.0707	-2.495	0.4157	0.2333	1.3153	7.1925	7.946	3.4932	4.6756	7.6895	6.3437	1.2643	0.0168	-0.0713	-0.6051	-0.6646	1.6369	99.9999	3.778	0	6.2156	11.3749	5.3552
S067WTS003	Codilean et al. 2022	993780		-0.1985	6.0697	0.1361	0.2407	0.3298	3.8451	4.9839	5.1655	29.1484	42.921	59.521	2.9862	3.1209	3.2499	0.0957	0.1425	0.2	5.4474	3.7015	2.9699	-2.2969	0	0	0	-0.6223	0.0748	0.1512	1.1897	4.6186	4.8302	-4.4228	-3.7723	4.6064	2.3089	-4.1263	0.7389	0.775	0.143	0.2161	1.6427	70.9583	4.748	2.5023	2.3026	9.2103	4.6052
S147WTS006	Codilean et al. 2022	82.9102		9.1931	5.4911	0.56179	0.8002	0.9363	4.3561	5.3172	5.3986	94.1268	125.12	154.672	5.5391	6.0255	6.255	0.3958	0.5564	0.6407	8.1413	5.3995	4.3135	1.32	23.021	40.7523	1.6068	-2.3157	0.3963	0.2748	1.5292	8.1481	8.0527	3.2263	3.6955	7.7913	5.7513	2.2327	-0.1301	-0.1307	-0.5148	-0.5153	1.8677	72.3249	3.172	0.7483	6.6892	10.8862	5.4638
S269WTS012	Codilean et al. 2022	340.532		7.7803	5.443	0.5591	0.8087	0.9607	4.182	5.2683	5.3054	91.4602	127.777	152.685	5.4453	5.9459	6.2206	0.4098	0.6008	0.6937	7.9905	5.5396	4.3585	1.3867	10.187	18.0415	0.8593	-2.062	0.2579	0.2808	1.5292	8.231	7.8494	3.3535	3.9108	7.9463	5.9935	1.7484	-0.4483	-0.3318	-0.7908	-0.6874	1.4525	78.7713	3.21	2.3593	6.8153	10.676	5.7822
S127WTS047	Codilean et al. 2022	1515.7		6.2872	6.1356	0.17834	0.3787	0.5437	3.3275	4.8653	4.9496	24.5155	44.1732	62.8002	3.1502	3.2046	3.8165	0.0902	0.1568	0.2797	6.9782	4.784	4.4041	-0.656	42.364	73.224	1.3901	-2.4091	0.6245	0.1885	1.4	6.7134	6.8739	-0.3783	0.6745	4.9265	2.9448	0.3103	0.3085	0.3711	-0.4917	-0.4211	1.0328	0	9.65	0	2.3026	9.2103	4.6052
S151WTS019	Codilean et al. 2022	313.591		7.8627	6.0535	0.52246	0.7527	0.9123	4.6104	5.3917	5.4698	92.7722	125.44	163.824	5.5692	5.8964	6.0649	0.3143	0.4512	0.5572	8.4272	5.7624	4.7922	1.1048	88.797	83.0415	1.5378	-2.6766	0.7322	0.3382	1.5545	7.9874	8.0541	2.9778	3.6779	7.1538	5.3233	2.9455	-0.428	-0.4608	-0.831	-0.8416	2.143	64.146	2.717	0	5.335	9.2103	4.6444
S183WTS024	Codilean et al. 2022	1465.46		6.3209	5.9614	0.6262	0.7407	0.8912	5.0192	5.6887	5.9283	120.604	167.736	227.922	6.596	7.1743	7.5252	0.3883	0.5628	0.6553	6.8424	5.0579	4.4213	0.0935	47.454	40.493	1.069	-2.4974	0.4132	0.2333	1.3153	7.1781	7.946	3.4699	4.6537	7.6855	6.3409	1.2503	0.0168	-0.0713	-0.6051	-0.6646	1.6369	100	3.774	0	6.2156	11.3919	5.365
S183WTS023	Codilean et al. 2022	1301.65		6.4394	5.9564	0.62817	0.7414	0.8918	5.0226	5.6891	5.9289	120.755	167.988	227.986	6.5987	7.1781	7.5252	0.3898	0.5631	0.6553	6.8424	5.0579	4.4213	0.0903	47.514	40.567	1.0687	-2.4986	0.4126	0.2333	1.3153	7.1734	7.946	3.4699	4.6537	7.6893	6.3449	1.2463	0.0168	-0.0713	-0.6051	-0.6646	1.6369	100	3.772	0	6.2156	11.3955	5.3675
S164WTS066	Codilean et al. 2022	63813.6		2.5471	6.1992	0.08703	0.1641	0.243	2.6866	4.6793	4.7022	10.4466	17.9515	26.4398	3.2904	3.6008	3.7878	0.0394	0.0648	0.1066	8.6133	5.3951	4.5928	0.6885	68.022	65.6858	1.3082	-2.4453	0.644	0.2475	1.1709	8.1082	7.896	2.7637	4.4324	6.8505	5.9352	2.2626	-1.619	-1.5422	-1.9733	-1.9194	0.0616	100	2	0	2.3026	9.2103	4.6052
S151WTS008	Codilean et al. 2022	1118.19		6.5914	6.0278	0.50645	0.7569	0.8861	4.3153	5.3087	5.3825	84.4103	121.339	147.692	5.3202	5.7597	6.0367	0.3043	0.4719	0.5652	8.4352	5.7035	4.759	0.89	93.689	79.3006	1.617	-2.7551	0.7349	0.3305	1.3123	7.9192	7.7903	2.9306	3.6037	7.1293	5.2725	2.5626	-0.1678	-0.1515	-0.6339	-0.6147	2.0548	0	6.028	0.0939	2.3026	9.2103	4.6052
S165WTS037	Codilean et al. 2022	959.62		6.7443	5.3765	0.21917	0.3535	0.4608	3.683	4.9383	5.0115	36.2652	50.018	61.6597	4.2702	4.5451	4.7309	0.1555	0.2167	0.2634	6.9379	4.6844	4.0211	0.1558	59.766	65.9194	1.213	-2.6621	0.597	0.2632	1.4974	7.1678	6.9414	1.4768	2.0519	6.284	4.3001	0.9154	-0.4166	-0.2913	-0.8985	-0.8158	1.1191	0	12	4.6151	3.5946	9.2103	4.6052
S138WTS007	Codilean et al. 2022	14443.5		4.0328	5.4523	0.35999	0.5912	0.7108	4.207	5.2024	5.2765	67.3873	97.6793	118.361	4.6486	5.2642	5.3049	0.2579	0.3988	0.4862	7.1399	4.4749	3.7164	-0.1535	51.677	56.0305	0.9918	-2.7076	0.4687	0.2394	1.3064	6.9068	6.9012	2.153	2.6012	6.8182	4.7428	0.3106	-1.5306	-1.5288	-1.9221	-1.9194	0.3591	83.4394	3.425	1.917	5.3665	9.2103	4.9379
S071WTS035	Codilean et al. 2022	1894.81		6.0639	5.903	0.50755	0.7033	0.8062	4.8188	5.5283	5.6223	100.029	137.755	185.018	5.4684	5.8424	6.0489	0.325	0.4682	0.5472	5.8606	4.3093	3.5358	-0.1936	54.438	54.8812	0.9199	-2.331	0.3646	0.2757	1.374	6.6147	6.4954	1.7464	2.5516	6.1893	4.3978	-0.3393	-0.8472	-0.7356	-1.2687	-1.23	1.268	48.3884	4.819	0	4.4113	9.2103	5.6846
S209WTS005	Codilean et al. 2022	9756.94		4.4251	5.974	0.25248	0.5598	0.7357	4.2421	5.4155	5.5594	58.5236	105.26	160.996	5.9384	6.5659	7.096	0.1593	0.3537	0.4666	9.2272	5.8887	4.7749	1.4	27.262	61.5125	1.1969	-2.2256	0.6235	0.3151	1.577	8.5968	8.9997	4.404	5.4025	8.5816	7.0705	3.6981	0.0569	0.1343	-0.4726	-0.3785	1.5195	92.3498	2.775	0	2.3026	9.2103	4.6052
S057WTS002	Codilean et al. 2022	1182.59		6.5354	5.3139	0.70023	0.9193	1.1349	4.6819	5.4987	5.5634	118.883	165.313	204.147	5.4297	5.7532	6.0152	0.4708	0.6997	0.8198	6.5419	4.3994	3.54	0.5281	14.534	29.3058	0.6528	-1.5731	0.1556	0.2493	1.3009	7.2883	7.1139	1.7149	2.5981	6.5182	4.8268	0.1964	-1.0131	-1.0048	-1.5119	-1.5055	0.6544	91.4754	2.783	2.2539	6.8653	10.8892	6.0158
S111WTS030	Codilean et al. 2022	292.524		7.9323	5.9257	0.58886	0.7665	0.9464	5.043	5.7373	6.0313	112.314	159.917	225.441	6.4774	7.0192	7.4422	0.3585	0.5632	0.6773	6.015	4.8485	4.0741	-0.1546	23.26	31.3349	1.1046	-3.0303	0.1753	0.2752	1.4355	6.7746	7.9324	6.1046	7.1123	10.3052	8.8116	0.4293	-0.2637	-0.1668	-0.8025	-0.7367	1.6976	99.4223	2	0	7.3291	12.5868	5.965
S010WTS028	Codilean et al. 2022	16516		3.8987	5.2621	0.29389	0.5098	0.6737	4.1558	5.2002	5.2559	50.1757	75.6571	103.659	4.8577	5.3375	5.536	0.1799	0.2834	0.3937	6.0049	4.1513	3.3225	-0.2591	81.146	93.5133	1.0331	-3.064	0.5286	0.1845	1.1947	6.697	6.7368	3.3695	4.2725	8.0804	6.4684	0.2453	-1.5214	-1.5159	-1.9407	-1.9372	0.4905	99.6778	2.018	0.0368	5.7398	9.2103	5.7654
S265WTS016	Codilean et al. 2022	11733.6		4.2406	5.6291	0.31913	0.5634	0.6681	3.616	4.9653	5.0195	41.7552	61.116	77.812	4.1838	4.4002	4.6195	0.1661	0.2569	0.3162	7.9106	5.2356	4.4278	0.242	46.406	95.2218	1.272	-3.018	0.5867	0.284	1.6074	7.2356	7.2058	1.9922	2.8988	6.5661	4.8998	1.181	-1.1603	-1.1612	-1.6045	-1.6045	0.4255	7.6238	10.074	4.3609	4.1285	9.2103	5.2487
S082WTS007	Codilean et al. 2022	55930		2.679	5.9804	0.27921	0.4654	0.5586	4.2137	5.2354	5.3669	52.2808	77.3929	100.824	4.6634	5.1333	5.2904	0.1793	0.2807	0.3628	6.2462	4.2291	3.7874	-1.6928	0	0.1709	0.1118	-1.6639	0.1118	0.2448	1.3665	5.5717	6.2765	1.0285	2.0688	5.6257	3.9385	-2.3289	-0.7415	-0.6698	-1.2276	-1.1654	1.0255	66.9915	5.026	3.2552	2.441	9.2103	4.6895
S123WTS013	Codilean et al. 2022	17041		3.8674	6.0877	0.35601	0.5672	0.6883	4.649	5.4803	5.6637	73.5197	106.305	158.461	4.7237	5.1132	5.3965	0.2213	0.3292	0.4275	5.9043	3.7203	3.1346	-1.511	0	0.5545	0.1346	-1.4238	0.1205	0.1956	1.1937	5.653	5.5722	-1.3744	0.0816	4.7379	2.7184	-2.7717	0.2371	0.1879	-0.2917	-0.3584	1.2602	44.0327	6.754	2.9817	4.5234	9.2103	4.6453
S071WTS019	Codilean et al. 2022	18337.1		3.7941	5.7974	0.3116	0.4859	0.5857	3.7544	4.9742	5.0166	44.9512	62.078	72.4931	4.3081	4.7109	4.7702	0.1777	0.2625	0.3108	5.9887	4.1236	3.4698	-0.3464	9.425	3.3765	0.5603	-1.9173	0.2758	0.2847	1.5128	6.5395	6.7049	1.6471	2.7451	6.1755	4.6434	-0.5076	-1.1258	-0.9093	-1.4837	-1.3525	0.5758	8.8417	6.719	0.6767	4.1822	9.2103	5.8108
S127WTS036	Codilean et al. 2022	6629.52		4.8115	6.0585	0.20493	0.4066	0.5504	3.6136	4.9479	5.0534	34.8789	56.5395	77.0386	3.5562	3.9529	4.0063	0.1241	0.2164	0.2867	6.8425	4.7977	4.3726	-0.7967	29.618	17.1848	1.0724	-2.2672	0.465	0.23	1.2595	6.4882	6.6432	0.3336	1.3297	5.2088	3.3505	-0.4106	-0.591	-0.5496	-1.179	-1.1348	1.0423	0	7.958	1.3921	2.3026	9.2103	4.6052
S070WTS001	Codilean et al. 2022	11438.8		4.2661	5.5105	0.2707	0.456	0.56	3.9206	5.029	5.0768	41.0303	58.3132	73.4815	3.3428	3.5841	3.6416	0.1482	0.2252	0.2808	5.3239	3.7568	3.1876	-1.2768	0	2.241	0	-0.8904	0.119	0.2065	1.2157	5.7519	5.7186	-2.6451	-1.4313	4.6591	2.4604	-2.4715	-0.3377	0.2348	-0.9106	-0.6406	1.2794	59.8329	6.286	2.4273	4.2625	9.2103	5.8482
S159WTS014	Codilean et al. 2022	139299		1.7664	6.1742	0.04286	0.0506	0.134	3.0033	4.7466	4.7775	11.5762	16.1406	30.4359	3.1487	3.4237	3.6753	0.0282	0.0329	0.0822	7.2444	4.3504	4.0443	-1.0015	0	11.7336	0.5917	-2.1689	0.277	0.2336	1.2658	6.3881	6.1756	0.53	1.501	5.2568	3.4011	-1.4578	-1.755	-1.6025	-2.0448	-1.9519	0.4039	99.9999	2.001	0	2.3026	9.2103	4.6052
S156WTS023	Codilean et al. 2022	102374		2.0744	5.686	0.14405	0.2968	0.4123	3.0519	4.7904	4.8396	19.6449	37.6993	49.2036	3.7533	4.1809	4.3316	0.0653	0.1374	0.2134	7.7431	4.8623	4.2728	0.2435	97.533	87.0998	1.1969	-3.4389	0.6415	0.263	1.3183	7.4348	7.4865	2.3795	3.1197	6.8697	5.0664	1.5657	-1.4939	-1.4372	-1.8931	-1.856	0.4924	99.9999	2	0	2.3026	9.2103	4.6052
S151WTS017	Codilean et al. 2022	375.395		7.6828	5.9665	0.57565	0.7956	0.9243	4.6701	5.4494	5.5712	106.251	144.741	177.485	5.786	6.2498	6.4544	0.3705	0.5334	0.6091	8.4428	5.6112	4.7519	1.2557	94.157	70.149	1.5856	-2.7662	0.6964	0.3337	1.402	8.0793	7.9746	3.3724	4.2266	7.5889	5.9192	2.899	-0.303	-0.3344	-0.7302	-0.7286	2.0767	0	4.685	0	4.9142	9.2103	4.666
S182WTS047	Codilean et al. 2022	23764.9		3.5349	5.9859	0.17987	0.3131	0.3902	3.4052	4.8892	4.9613	27.6224	42.3678	55.7179	4.0021	4.5476	4.8318	0.0982	0.1651	0.2126	7.1323	4.8303	4.3454	0.1278	32.013	44.4626	1.3589	-2.2692	0.6024	0.3126	1.306	7.4054	7.26	2.0653	3.0619	6.3959	4.7976	1.1813	-0.3939	0.145	-0.8349	-0.4889	1.5608	84.2732	3.268	2.5234	2.3026	9.2103	4.6052
S105WTS004	Codilean et al. 2022	3386.1		5.4834	5.553	0.4018	0.6084	0.7312	4.2548	5.1922	5.3094	60.1825	83.4279	108.818	3.9691	4.181	4.4748	0.2189	0.3259	0.4119	5.8757	4.0469	3.3234	-0.5344	3.252	4.0284	0.5533	-1.9988	0.2464	0.2115	1.2504	6.3359	6.3471	-1.2174	-0.0954	4.83	2.8039	-1.0344	-0.6501	-0.347	-1.1102	-0.9416	1.2029	26.9837	6.642	0	4.4473	9.6183	5.904
S226WTS026	Codilean et al. 2022	51575.9		2.76	5.922	0.28122	0.4682	0.5616	4.2091	5.2306	5.37	52.2842	76.9926	99.8926	4.6425	5.1166	5.2934	0.1811	0.2847	0.3659	6.2656	4.2291	3.7874	-1.6934	0	0.1793	0.1118	-1.6571	0.1135	0.2448	1.3665	5.5691	6.274	1.0285	2.0688	5.6556	3.976	-2.3271	-0.7413	-0.6769	-1.2266	-1.1702	1.0255	65.3823	5.175	3.3021	2.4453	9.2103	4.6997
S127WTS035	Codilean et al. 2022	15801.8		3.9429	6.0141	0.2864	0.4958	0.6053	3.9371	5.0574	5.1187	47.6808	68.6497	84.2634	3.9623	4.3399	4.5458	0.1702	0.278	0.3369	6.4713	4.3396	3.8927	-0.8223	44.275	17.4808	0.8316	-2.332	0.4231	0.2373	1.2884	6.5397	6.275	-0.003	1.2587	5.0825	3.3277	-0.8551	-0.7195	-0.7781	-1.3413	-1.3602	1.1339	0	6.786	0	2.3026	9.2103	4.6052
S127WTS019	Codilean et al. 2022	22006.5		3.6117	6.0175	0.17353	0.3561	0.4773	3.7472	4.9617	5.1955	34.1489	53.5946	72.564	4.2291	4.6113	4.8923	0.1054	0.1845	0.2563	6.5856	4.1819	3.7292	-0.8408	0.124	0	0.284	-1.8042	0.1923	0.2506	1.4	6.4183	6.3865	0.3038	1.6692	5.2102	3.6081	-1.3753	-0.7653	-0.6175	-1.2191	-1.0838	1.1553	70.7748	4.213	0	2.3026	9.2103	4.6052
S108WTS009	Codilean et al. 2022	1841.54		6.0925	5.8445	0.41359	0.6448	0.7918	4.7417	5.625	5.905	80.4457	108.114	154.33	5.8748	6.6174	7.001	0.2815	0.4249	0.5326	6.1348	5.058	4.4053	0.0312	86.425	77.6233	1.2944	-3.3524	0.5837	0.2804	1.3329	7.1638	7.4121	1.8763	3.009	6.3314	4.8513	1.1894	-0.3503	-0.2858	-0.8766	-0.826	1.2485	73.4775	2.74	0.4552	4.5376	9.2103	5.1162
S156WTS012	Codilean et al. 2022	314633		0.9517	5.5773	0.0328	0.0604	0.0834	2.5467	4.6467	4.6616	4.0892	5.8675	7.885	2.8162	3.0628	3.3903	0.0134	0.0203	0.0318	7.4658	4.8631	4.268	-0.0803	92.347	61.3429	1.1303	-3.7898	0.5974	0.2467	1.4143	7.1153	7.1501	1.449	2.1122	6.1484	4.2302	0.9154	-1.92	-1.7976	-2.1312	-2.0628	0.2763	85.469	2.295	0	2.3026	9.2103	4.6052
S108WTS017	Codilean et al. 2022	1127.44		6.5831	5.8357	0.6321	0.847	0.994	4.9206	5.525	5.6285	125.778	164.247	201.964	5.7155	6.0263	6.1921	0.4285	0.595	0.6748	6.5386	5.1641	4.5369	0.1739	89.411	60.9931	1.2812	-3.3354	0.6473	0.2826	1.4351	7.3355	7.602	4.4816	5.5227	8.7648	7.2976	1.6268	-0.3504	-0.3292	-0.8749	-0.8592	1.2695	28.1902	5.935	3.5481	4.6622	9.2103	4.9379
S151WTS034	Codilean et al. 2022	343.859		7.7706	5.9106	0.50213	0.7129	0.8556	4.5506	5.3499	5.4663	91.405	119.462	164.325	5.7629	6.1339	6.4262	0.3059	0.43	0.5223	8.3382	5.7646	4.8172	1.0205	91.951	93.9399	1.5031	-2.7076	0.7163	0.344	1.4749	7.9764	7.8066	2.9156	3.8468	7.2015	5.5942	2.6275	-0.3006	-0.2518	-0.6923	-0.6551	2.2237	35.7027	3.286	0	2.3026	9.2103	4.6052
S151WTS033	Codilean et al. 2022	449.63		7.5024	5.9106	0.50213	0.7129	0.8556	4.5506	5.3499	5.4663	91.405	119.462	164.325	5.7629	6.1339	6.4262	0.3059	0.43	0.5223	8.3382	5.7646	4.8172	1.0205	91.951	93.9399	1.5031	-2.7076	0.7163	0.344	1.4749	7.9764	7.8066	2.9156	3.8468	7.2015	5.5942	2.6275	-0.3006	-0.2518	-0.6923	-0.6551	2.2237	35.7027	3.286	0	2.3026	9.2103	4.6052
S102WTS010	Codilean et al. 2022	5328.58		5.03	5.5795	0.22198	0.4269	0.5788	3.7898	5.0132	5.1446	40.3278	64.9544	89.8046	3.4266	3.598	3.7775	0.1511	0.2704	0.366	5.7781	3.7863	3.2343	-0.9811	0	4.239	0	-1.4841	0.0814	0.2317	1.344	5.8463	5.6597	-1.772	-0.4813	4.7348	2.6615	-2.3946	-0.5632	0.0405	-1.1397	-0.681	0.4969	17.9541	8.424	3.6823	4.5604	9.2103	5.984
S127WTS010	Codilean et al. 2022	179493		1.5129	5.9902	0.16495	0.342	0.4535	3.4795	4.8863	4.9465	26.8703	43.9061	60.0192	3.8615	4.2396	4.2633	0.092	0.1671	0.2286	6.0228	4.3276	3.8157	-0.7074	0.091	0.0263	0.43	-1.9675	0.2258	0.2277	1.3171	6.6511	6.5719	0.6851	1.8302	5.4148	3.7449	-1.0272	-1.0892	-1.0103	-1.5292	-1.458	1.1486	0	6.088	0	2.3026	9.2103	4.6052
S023WTS021	Codilean et al. 2022	2544.57		5.7691	5.5533	0.10502	0.2015	0.3469	3.5675	4.9971	5.1023	23.7542	41.2896	63.6127	3.5724	3.9477	4.2863	0.0696	0.1373	0.2357	5.9124	3.9486	3.3021	-0.8899	41.749	36.2229	0.9328	-2.6927	0.321	0.1667	1.0718	6.3399	6.2096	-1.2448	-0.1462	4.8243	2.7839	-1.2289	-1.4389	-1.3056	-1.9187	-1.8357	0.5	19.8269	6.118	1.4968	4.2137	9.2103	5.475
S076WTS017	Codilean et al. 2022	97.6739		9.0292	5.7991	0.46389	0.7008	0.8191	4.1851	5.1917	5.2578	72.5843	99.2349	115.032	5.2572	5.6768	5.9614	0.2758	0.4049	0.4775	7.5494	5.5203	4.7225	0.3361	39.346	80.0977	1.0554	-2.4079	0.642	0.2734	1.4192	7.6218	7.7908	2.9558	4.0385	7.3196	5.8636	1.8986	0.0405	-0.0371	-0.5754	-0.6234	1.6325	73.4397	4.096	0	2.3026	9.2103	4.6052
S218WTS018	Codilean et al. 2022	129349		1.8405	5.9099	0.1505	0.3359	0.457	3.2517	4.8286	4.9094	22.4649	37.7543	49.5777	3.1007	3.4158	3.6493	0.093	0.1747	0.2352	5.7442	4.1625	3.5814	-1.5292	1.001	8.6054	0.3459	-1.9863	0.2274	0.1597	1.1891	5.948	5.8928	-1.3471	-0.2345	4.7607	2.6616	-2.2319	-1.8496	-1.8598	-2.1005	-2.1054	0.2705	99.3257	3.854	0	2.3026	9.2103	4.6052
S009WTS007	Codilean et al. 2022	32635.2		3.2177	4.918	0.17893	0.2852	0.3625	3.3858	4.9036	4.9406	31.5512	46.5866	52.6369	3.6209	3.8316	3.8871	0.1321	0.2078	0.2597	6.7631	4.3892	3.5379	0.3826	75.491	72.3829	1.2782	-2.972	0.5934	0.2871	1.4627	7.0089	7.0471	1.0382	1.9795	6.1636	4.4903	1.1695	-1.9126	-1.9194	-2.1178	-2.1211	0.3784	99.9999	2	0	5.2443	9.2103	5.5145
S127WTS018	Codilean et al. 2022	29882.7		3.3058	5.9616	0.13099	0.27	0.386	3.4081	4.912	5.0276	25.1492	41.7921	66.177	3.9051	4.2262	4.3177	0.0708	0.1218	0.2037	6.5047	4.1197	3.66	-0.7973	0.334	0	0.2857	-1.5087	0.188	0.2561	1.4196	6.474	6.3799	0.2859	1.6559	5.2224	3.6311	-1.359	-0.843	-0.7261	-1.2773	-1.1654	1.1846	51.761	5.508	0	2.3026	9.2103	4.6052
S069WTS025	Codilean et al. 2022	1067.7		6.6376	5.0153	0.54866	0.8098	0.9721	4.682	5.4479	5.4924	103.261	147.891	199.45	5.4264	5.8187	5.9199	0.4161	0.6193	0.7313	6.7988	4.43	3.5058	0.6231	19.885	43.4858	0.6504	-1.7209	0.2126	0.2683	1.3775	7.0842	6.894	1.7311	2.5683	6.6965	4.975	0.2288	-1.2133	-1.2023	-1.6317	-1.6235	0.6076	99.9999	2	0	6.0445	11.3572	5.9548
S135WTS002	Codilean et al. 2022	11450		4.2651	6.0556	0.28081	0.4333	0.5881	4.6034	5.3887	5.4437	67.193	99.5109	132.84	5.5685	5.9617	6.177	0.2034	0.2887	0.3608	7.462	4.7789	4.0821	0.4076	68.96	48.812	1.0444	-2.7106	0.5334	0.2441	1.3023	7.4749	7.3885	2.8766	3.3876	7.0592	5.0476	1.325	-0.0952	-0.1269	-0.643	-0.6661	1.4452	0	7	0	2.3026	9.2103	4.6052
S069WTS019	Codilean et al. 2022	1444.96		6.335	4.9811	0.50817	0.7383	0.8969	4.6146	5.3824	5.4678	92.8687	130.199	169.661	5.4939	5.7418	5.8528	0.3825	0.5585	0.6552	7.1944	4.4199	3.5247	0.5628	31.139	55.2119	0.5349	-2.0931	0.3167	0.2749	1.4376	7.1425	7.002	1.7492	2.4566	6.7303	4.8903	0.5469	-0.8916	-0.873	-1.4372	-1.418	0.6931	98.6913	2.118	0.8366	5.8276	10.0912	5.8736
S037WTS001	Codilean et al. 2022	1134.52		6.5769	5.0529	0.61551	0.8497	1.0183	4.6524	5.4233	5.5052	121.282	159.761	202.345	5.5772	5.9731	6.1256	0.4492	0.6247	0.7281	6.593	4.7756	3.8908	0.1007	23.073	67.0231	0.911	-2.0272	0.3349	0.2634	1.4081	6.897	7.0527	2.3555	3.0506	7.2414	5.4091	0.2855	-1.1105	-1.077	-1.5707	-1.5498	0.904	99.9952	2.642	0	5.9603	10.815	5.7468
S207WTS022	Codilean et al. 2022	811.67		6.9117	5.0203	0.45692	0.7299	0.8877	4.5042	5.3837	5.4537	91.6325	131.394	162.282	5.5941	6.0068	6.2911	0.345	0.5203	0.596	6.226	4.6506	3.7087	0.5494	10.429	29.154	0.7874	-1.7527	0.2104	0.2575	1.3183	7.1469	7.376	2.5476	3.2129	7.4396	5.5837	0.5803	-1.0915	-1.0892	-1.5616	-1.5606	0.6994	68.7593	3.843	2.6894	6.9997	12.0615	6.0189
S207WTS015	Codilean et al. 2022	490.46		7.4155	5.0413	0.47037	0.7344	0.9143	4.8851	5.5574	5.6622	97.9325	136.005	189.47	5.7349	6.035	6.2309	0.3764	0.5468	0.6654	5.9047	4.393	3.5029	0.2545	21.135	26.7718	0.3965	-1.9519	0.2249	0.2576	1.3333	6.9544	6.7606	2.0769	2.7851	6.9917	5.1636	-0.1345	-0.7036	-0.6415	-1.216	-1.1696	0.9733	38.1249	7.29	3.6318	6.3538	11.8516	5.9785
S075WTS009	Codilean et al. 2022	3337.7		5.4978	4.9275	0.41732	0.6673	0.7914	3.9856	5.1799	5.3113	73.4955	110.293	141.746	4.9018	5.48	5.7796	0.2932	0.469	0.5627	6.7796	4.7756	3.6366	0.6108	76.068	77.8668	1.0403	-2.7031	0.4543	0.2271	1.316	7.4635	7.3732	2.2635	2.8408	7.2252	5.2802	1.2605	-0.8654	-0.8877	-1.3972	-1.411	0.8536	97.1819	2.25	1.1582	6.9123	9.2103	5.9917
S151WTS021	Codilean et al. 2022	243.143		8.1172	5.8122	0.55249	0.7757	0.9356	4.7742	5.4618	5.6319	102.791	137.598	182.411	5.8122	6.2713	6.441	0.346	0.4958	0.6012	8.3846	5.7972	4.7577	1.3205	91.449	67.6835	1.4849	-2.7318	0.7248	0.3097	1.4903	8.0913	7.873	2.9586	3.4648	7.3128	5.3019	2.9353	-0.4756	-0.5258	-0.8519	-0.9009	2.1571	70.0169	2.6	0	5.1472	9.2103	4.6403
S018WTS004	Codilean et al. 2022	19593.7		3.7279	4.9088	0.1218	0.2998	0.3882	3.1409	4.7856	4.8435	22.0379	32.8067	41.9264	3.6593	3.853	4.3853	0.0922	0.1475	0.1915	7.1123	4.5591	3.6034	0.6876	68.856	73.3292	1.2427	-2.8336	0.6043	0.2865	1.4401	7.3592	7.2568	1.6834	2.1768	6.7096	4.6724	1.6103	-0.9816	-0.9916	-1.5119	-1.5205	0.5961	82.894	2.983	1.1445	5.5337	9.2103	5.5203
S075WTS006	Codilean et al. 2022	7067.65		4.7475	4.9109	0.31447	0.5044	0.6258	4.1496	5.1149	5.1721	53.7821	76.3505	101.441	5.0954	5.3392	5.5418	0.1916	0.2883	0.3571	6.022	4.3182	3.3155	-0.0136	65.514	67.0927	0.8946	-2.62	0.4184	0.2317	1.3314	6.9437	6.773	1.4891	2.1483	6.5396	4.6455	0.1762	-1.0809	-1.0602	-1.5823	-1.5621	0.7174	100	2.003	0	6.2929	9.2103	5.8779
S073WTS006	Codilean et al. 2022	702.361		7.0564	5.7868	0.49556	0.7227	0.8341	4.5491	5.3358	5.3791	89.7397	117.744	145.951	5.4388	5.7407	5.9677	0.3127	0.4361	0.4962	8.3706	5.7633	4.7829	1.0371	93.221	78.0993	1.4794	-2.7395	0.7152	0.3478	1.4784	7.9779	8.0239	3.0102	3.3926	7.3793	5.2518	2.8237	-0.4422	-0.4678	-0.8909	-0.9073	2.0657	0	5.412	0.1541	5.1115	9.2103	4.6171
S009WTS056	Codilean et al. 2022	24974		3.4852	5.0612	0.11214	0.2867	0.3551	3.2487	4.8118	4.837	22.8488	33.9649	43.0421	3.7467	3.9614	4.1748	0.0873	0.138	0.178	6.9859	4.5564	3.8203	0.2374	45.409	73.5724	1.2609	-2.5421	0.6049	0.2702	1.2669	7.1346	7.2515	1.4209	1.8302	6.4064	4.2849	1.2641	-1.4061	-1.4155	-1.8502	-1.8618	0.4742	99.9999	2.094	0	4.9362	9.2103	5.0972
S196WTS011	Codilean et al. 2022	231.693		8.1654	5.8075	0.50595	0.7163	0.8598	4.5561	5.3542	5.4722	91.5573	120.44	165.035	5.761	6.155	6.4332	0.3042	0.4288	0.5217	8.3382	5.7596	4.8102	1.0402	95.928	93.6782	1.5257	-2.7662	0.7146	0.345	1.5169	7.9838	7.8047	2.8685	3.8063	7.2323	5.6325	2.6365	-0.3006	-0.2518	-0.6923	-0.6551	2.2237	38.4303	3.231	0	2.3026	9.2103	4.6052
S111WTS010	Codilean et al. 2022	2035.06		5.9925	5.6745	0.49339	0.7422	0.9099	4.57	5.4725	5.5907	97.9775	143.123	188.811	5.6079	5.9195	6.4128	0.3415	0.5426	0.6751	6.6549	5.2365	4.4839	0.3868	50.851	56.5293	1.0192	-2.5836	0.5732	0.2413	1.3575	7.6281	7.7975	2.7548	3.8629	7.2201	5.7845	1.7636	-0.0964	-0.1155	-0.6593	-0.6578	1.7027	100	3.948	0	4.5705	9.2103	4.751
S038WTS028	Codilean et al. 2022	90243.6		2.2006	5.8243	0.0245	0.0363	0.0542	2.8913	4.7181	4.786	8.0228	11.9841	20.2106	3.0368	3.3281	3.4893	0.0144	0.0188	0.0291	6.2907	4.3003	3.8308	-1.4964	0	0	0.3834	-1.969	0.2432	0.1391	1.0972	6.0017	6.1349	-0.9519	0.2912	4.8447	2.8821	-1.9581	-1.7556	-1.6317	-2.0762	-2.0144	0.2705	99.9999	2.059	0	2.3026	9.2103	4.6052
S151WTS003	Codilean et al. 2022	220.309		8.2158	3.9947	0.54505	0.7449	0.8636	4.313	5.3111	5.3508	91.701	123.838	147.923	5.153	5.5654	5.6043	0.3347	0.5008	0.5712	8.2781	5.7555	4.7308	1.3622	96.154	76.5635	1.5391	-2.7726	0.7215	0.3248	1.3318	8.1335	7.8627	1.8818	2.4296	7.2728	5.3011	2.9497	-0.6216	-0.6307	-1.0079	-1.0178	2.0962	0	5.639	0	4.6702	9.2103	4.7152
S193WTS011	Codilean et al. 2022	896.874		6.8119	5.5969	0.69843	0.8813	1.0785	4.6749	5.6236	5.9434	87.01	130.578	188.727	5.7925	6.1424	6.4206	0.4697	0.7097	0.8342	6.8901	4.7973	4.169	0.3474	77.292	34.3874	0.7268	-2.9281	0.4495	0.311	1.3421	6.8627	7.332	1.7145	2.6656	6.3515	4.7073	1.0119	-0.4036	0.1895	-0.9345	-0.7034	0.9472	64.1629	4.185	1.2024	4.516	9.2103	5.5183
S151WTS035	Codilean et al. 2022	320.455		7.8411	5.7995	0.50534	0.7161	0.8591	4.5575	5.3554	5.4732	91.155	119.526	164.739	5.7577	6.1617	6.4341	0.304	0.4282	0.5217	8.3382	5.7596	4.8102	1.0418	96.252	93.66	1.5275	-2.7726	0.7143	0.345	1.5169	7.9843	7.8047	2.8685	3.8063	7.2379	5.6384	2.6369	-0.3006	-0.2518	-0.6923	-0.6551	2.2237	38.6934	3.226	0	2.3026	9.2103	4.6052
S151WTS004	Codilean et al. 2022	848.81		6.867	5.7697	0.52111	0.728	0.8425	4.3034	5.2202	5.3204	87.4668	116.244	139.112	5.2489	5.6554	5.6917	0.3132	0.4659	0.5356	8.3112	5.7776	4.7317	1.4294	95.014	76.098	1.5323	-2.7662	0.7224	0.3228	1.3254	8.1569	7.7717	2.9075	3.4539	7.2954	5.3225	2.9252	-0.5779	-0.5987	-0.9681	-0.9734	2.1145	0	4.706	0	5.0993	9.2103	4.6984
S151WTS005	Codilean et al. 2022	177.414		8.4323	5.7697	0.52111	0.728	0.8425	4.3034	5.2202	5.3204	87.4668	116.244	139.112	5.2489	5.6554	5.6917	0.3132	0.4659	0.5356	8.3112	5.7776	4.7317	1.4294	95.014	76.098	1.5323	-2.7662	0.7224	0.3228	1.3254	8.1569	7.7717	2.9075	3.4539	7.2954	5.3225	2.9252	-0.5779	-0.5987	-0.9681	-0.9734	2.1145	0	4.706	0	5.0993	9.2103	4.6984
S102WTS002	Codilean et al. 2022	83238		2.2814	5.5497	0.0723	0.1418	0.2276	2.9133	4.7224	4.7438	12.4868	19.7341	26.3716	2.9863	3.2913	3.3808	0.0437	0.0843	0.1206	5.7736	3.7278	3.2238	-0.9475	0	0	0.1722	-0.9744	0.1178	0.2199	1.3097	6.0419	6.207	0.1672	0.7491	5.3159	3.2299	-1.8048	-1.2556	-0.0117	-1.6119	-0.9475	0.8299	0	12	4.6151	3.5499	9.2103	5.842
S149WTS011	Codilean et al. 2022	15695.3		3.9497	5.9702	0.15948	0.2753	0.386	3.3231	4.8256	5.0448	25.5291	42.821	64.5251	4.0665	4.3444	4.7477	0.0925	0.1596	0.2385	8.947	5.619	4.7485	0.6356	23.164	90.7956	1.3917	-2.25	0.5886	0.2856	1.4427	8.0134	7.6281	2.8558	3.5823	7.103	5.2959	1.8481	-0.521	-0.3744	-1.0636	-0.9193	1.2061	99.9999	3.699	0	2.3026	9.2103	4.6052
S261WTS015	Codilean et al. 2022	2389.88		5.8318	5.3857	0.1536	0.2938	0.4335	3.529	4.8812	4.9477	23.4902	34.657	45.8718	3.6556	4.032	4.1666	0.0788	0.1335	0.1856	5.667	4.0388	3.3707	-1.1174	32.944	18.7436	0.4469	-2.4853	0.3014	0.1464	1.0556	6.2226	6.3158	-0.7614	0.7429	4.9789	3.2972	-1.3623	-1.1279	-1.0269	-1.6858	-1.6129	0.6713	3.8244	8.433	2.9033	4.4687	9.2103	5.4792
S261WTS014	Codilean et al. 2022	1587.66		6.2408	5.3857	0.1536	0.2938	0.4335	3.529	4.8812	4.9477	23.4902	34.657	45.8718	3.6556	4.032	4.1666	0.0788	0.1335	0.1856	5.667	4.0388	3.3707	-1.1174	32.944	18.7436	0.4469	-2.4853	0.3014	0.1464	1.0556	6.2226	6.3158	-0.7614	0.7429	4.9789	3.2972	-1.3623	-1.1279	-1.0269	-1.6858	-1.6129	0.6713	3.8244	8.433	2.9033	4.4687	9.2103	5.4792
S072WTS003	Codilean et al. 2022	9118.27		4.4928	5.4853	0.4717	0.7055	0.8144	4.5232	5.4137	5.6416	83.2489	115.747	144.839	5.0075	5.4904	5.8658	0.3341	0.5142	0.5907	4.7294	3.7943	3.2642	-1.4757	0	29.0772	0	-1.2827	0.0477	0.2578	1.3955	5.376	5.6963	0.6627	1.8032	5.6296	4.026	-2.8281	-0.679	-0.6179	-1.1728	-1.1202	1.1348	100	2	0	6.2796	11.5114	6.1357
S121WTS011	Codilean et al. 2022	8855.68		4.522	4.8909	0.28846	0.4287	0.505	3.979	5.0418	5.1025	48.9449	65.3987	79.8306	4.54	4.7394	4.7814	0.1874	0.2664	0.305	6.7661	4.3842	3.6003	0.5641	84.336	77.6432	1.2355	-3.0078	0.5597	0.2822	1.4122	7.2349	6.8706	1.2795	2.0442	6.3723	4.562	1.0687	-0.9357	-0.8543	-1.4563	-1.3759	0.7203	94.1028	2.348	0.8403	4.7026	9.2103	5.58
S015WTS012	Codilean et al. 2022	30170.3		3.2962	5.4402	0.22728	0.5019	0.5818	3.9259	5.0083	5.0737	50.2221	66.8207	82.1605	4.6932	4.931	5.0813	0.1891	0.2809	0.3307	7.3708	4.8435	4.1112	0.4254	100	96.0405	1.3484	-3.4705	0.6417	0.226	1.2758	7.4737	7.3939	2.2369	2.905	6.9009	5.0316	1.6255	-1.1354	-1.1764	-1.7649	-1.7838	0.6459	89.7507	2.163	0	5.1245	9.2103	5.1426
S015WTS018	Codilean et al. 2022	21410.9		3.6392	5.4402	0.22728	0.5019	0.5818	3.9259	5.0083	5.0737	50.2221	66.8207	82.1605	4.6932	4.931	5.0813	0.1891	0.2809	0.3307	7.3708	4.8435	4.1112	0.4254	100	96.0405	1.3484	-3.4705	0.6417	0.226	1.2758	7.4737	7.3939	2.2369	2.905	6.9009	5.0316	1.6255	-1.1354	-1.1764	-1.7649	-1.7838	0.6459	89.7507	2.163	0	5.1245	9.2103	5.1426
S015WTS015	Codilean et al. 2022	33827.3		3.1818	5.4402	0.22728	0.5019	0.5818	3.9259	5.0083	5.0737	50.2221	66.8207	82.1605	4.6932	4.931	5.0813	0.1891	0.2809	0.3307	7.3708	4.8435	4.1112	0.4254	100	96.0405	1.3484	-3.4705	0.6417	0.226	1.2758	7.4737	7.3939	2.2369	2.905	6.9009	5.0316	1.6255	-1.1354	-1.1764	-1.7649	-1.7838	0.6459	89.7507	2.163	0	5.1245	9.2103	5.1426
S015WTS014	Codilean et al. 2022	18639.1		3.7778	5.4402	0.22728	0.5019	0.5818	3.9259	5.0083	5.0737	50.2221	66.8207	82.1605	4.6932	4.931	5.0813	0.1891	0.2809	0.3307	7.3708	4.8435	4.1112	0.4254	100	96.0405	1.3484	-3.4705	0.6417	0.226	1.2758	7.4737	7.3939	2.2369	2.905	6.9009	5.0316	1.6255	-1.1354	-1.1764	-1.7649	-1.7838	0.6459	89.7507	2.163	0	5.1245	9.2103	5.1426
S069WTS033	Codilean et al. 2022	967.688		6.7359	4.8819	0.59223	0.8425	1.0272	4.6125	5.4766	5.623	115.099	154.3	198.716	5.3939	5.6876	5.7277	0.4555	0.6694	0.7608	7.174	4.4286	3.5398	0.676	22.604	47.9239	0.8601	-1.8515	0.2077	0.2655	1.3417	7.2061	6.9724	2.0886	2.7826	7.0879	5.2499	0.3236	-0.9734	-0.9739	-1.4684	-1.4732	0.597	98.6316	2.316	0.8621	6.0145	10.9466	5.9185
S086WTS020	Codilean et al. 2022	191.867		8.354	5.6454	0.65793	0.7974	0.9936	4.9849	5.6982	5.8046	124.483	182.422	241.405	6.5073	6.9063	6.9739	0.4003	0.6347	0.7795	4.9812	4.6907	3.8969	-0.4411	13.709	16.7081	0.4826	-2.7181	0.1529	0.2773	1.4427	6.4122	7.4353	2.9126	4.1121	7.3875	6.048	-0.2738	-0.1795	-0.2008	-0.7842	-0.7897	1.5103	99.8605	3.123	0.1306	6.737	13.4897	5.9564
S218WTS006	Codilean et al. 2022	145000		1.7263	5.8108	0.08331	0.2246	0.3834	2.9869	4.7433	4.8334	14.4026	24.0859	37.4741	2.8623	2.9974	3.3549	0.0479	0.1012	0.1592	6.1101	4.2512	3.7069	-1.5976	0.041	18.5572	0.3628	-1.9834	0.2271	0.1416	1.153	5.8595	6.0376	-2.2634	-1.0244	4.6713	2.492	-2.1607	-1.712	-1.6487	-2.062	-2.025	0.2705	72.8738	4.744	3.3367	2.3026	9.2103	4.6052
S071WTS018	Codilean et al. 2022	18214.1		3.8009	5.5602	0.24873	0.3995	0.4905	3.4553	4.8785	4.9115	35.2252	52.4376	63.4113	3.8379	4.0907	4.1238	0.1424	0.2271	0.2727	6.0038	4.0826	3.4672	-0.4625	2.036	0	0.5773	-1.9058	0.3238	0.2861	1.5311	6.5092	6.659	1.4022	2.4742	6.1214	4.5585	-0.5104	-1.1093	-0.8287	-1.4714	-1.2827	0.5584	0.4473	7.289	2.5434	3.8098	9.2103	5.7577
S143WTS016	Codilean et al. 2022	5224.72		5.0497	5.0084	0.35923	0.5861	0.7238	4.4236	5.3024	5.3757	71.2611	101.352	129.394	5.0959	5.6271	5.7012	0.2619	0.394	0.4621	7.0279	4.6684	3.816	0.0756	28.603	54.2714	0.9346	-2.1866	0.4368	0.2649	1.3583	7.0023	6.8354	1.6124	2.2775	6.5966	4.7108	0.3457	-0.7664	-0.7095	-1.2794	-1.2399	0.9821	88.3423	4.33	2.5383	5.2244	9.2103	5.4532
S283WTS022	Codilean et al. 2022	786.887		6.9427	4.9203	0.49379	0.7902	1.0016	4.8947	5.6316	5.722	102.228	144.158	205.659	5.9107	6.3664	6.5217	0.399	0.6015	0.7063	5.8841	4.6585	3.7424	-0.0072	8.114	33.8725	0.7362	-1.5578	0.1122	0.2489	1.3038	6.6463	6.9419	2.2718	2.9561	7.2368	5.394	-0.4723	-0.8133	-0.7731	-1.336	-1.3075	0.9042	66.3063	3.814	2.5868	6.8775	12.3256	6.0491
S283WTS023	Codilean et al. 2022	1136.57		6.575	4.9203	0.49379	0.7902	1.0016	4.8947	5.6316	5.722	102.228	144.158	205.659	5.9107	6.3664	6.5217	0.399	0.6015	0.7063	5.8841	4.6585	3.7424	-0.0072	8.114	33.8725	0.7362	-1.5578	0.1122	0.2489	1.3038	6.6463	6.9419	2.2718	2.9561	7.2368	5.394	-0.4723	-0.8133	-0.7731	-1.336	-1.3075	0.9042	66.3063	3.814	2.5868	6.8775	12.3256	6.0491
S283WTS024	Codilean et al. 2022	438.33		7.5278	4.9203	0.49379	0.7902	1.0016	4.8947	5.6316	5.722	102.228	144.158	205.659	5.9107	6.3664	6.5217	0.399	0.6015	0.7063	5.8841	4.6585	3.7424	-0.0072	8.114	33.8725	0.7362	-1.5578	0.1122	0.2489	1.3038	6.6463	6.9419	2.2718	2.9561	7.2368	5.394	-0.4723	-0.8133	-0.7731	-1.336	-1.3075	0.9042	66.3063	3.814	2.5868	6.8775	12.3256	6.0491
S193WTS009	Codilean et al. 2022	549.479		7.3018	5.5481	0.70409	0.8844	1.0823	4.6833	5.6252	5.9447	86.6326	130.186	191.072	5.8094	6.1427	6.4328	0.4736	0.7154	0.8405	6.885	4.7973	4.169	0.3517	76.673	33.3811	0.7254	-2.9132	0.4472	0.311	1.3421	6.8609	7.342	1.7145	2.6656	6.3808	4.7395	1.0177	-0.4036	0.1895	-0.9345	-0.7034	0.9472	66.4707	4.084	1.2273	4.5265	9.2103	5.5359
S193WTS010	Codilean et al. 2022	924.73		6.7813	5.5476	0.70408	0.8844	1.0823	4.6833	5.6252	5.9447	86.5905	130.059	191.165	5.8097	6.1427	6.4331	0.4736	0.7154	0.8405	6.885	4.7973	4.169	0.3517	76.667	33.3811	0.7254	-2.9132	0.4472	0.311	1.3421	6.8609	7.342	1.7145	2.6656	6.3811	4.7399	1.0177	-0.4036	0.1895	-0.9345	-0.7034	0.9472	66.4953	4.082	1.2275	4.5265	9.2103	5.5359
S057WTS009	Codilean et al. 2022	3499.68		5.4504	4.9868	0.59044	0.8584	1.0235	4.3716	5.355	5.4164	111.457	154.524	185.699	4.9255	5.0786	5.1481	0.4419	0.6514	0.7497	6.2904	4.4164	3.5994	0.3928	31.75	42.151	0.9	-2.0818	0.3461	0.2726	1.4393	7.2736	7.1378	1.4653	2.1096	6.4816	4.5706	0.6104	-1.0197	-0.9671	-1.5228	-1.4819	0.6549	61.2587	5.832	3.6599	6.2568	9.3205	5.8308
S127WTS039	Codilean et al. 2022	22234.7		3.6014	5.8302	0.21528	0.4038	0.508	3.7067	4.9617	5.0033	32.5231	48.1867	61.8176	3.5676	3.8837	4.1172	0.1175	0.1884	0.2548	6.0844	4.4815	4.0184	-0.9256	32.768	17.0693	0.9084	-2.33	0.404	0.2191	1.2472	6.4132	6.4594	-0.3667	0.7631	5.0035	3.1164	-0.8255	-1.0709	-1.0029	-1.5635	-1.4934	1.0718	0	7.379	0	2.3026	9.2103	4.6052
S023WTS037	Codilean et al. 2022	9176.8		4.4864	5.4121	0.08468	0.1539	0.2902	3.0581	4.7424	4.7756	12.6428	17.8302	25.2927	2.6788	2.7691	2.7778	0.0476	0.079	0.1172	5.5864	4.0144	3.5902	-1.2505	4.026	6.1717	0.3838	-2.2624	0.2041	0.1545	1.0826	6.044	5.9452	-2.7806	-1.5847	4.6546	2.4475	-2.0353	-1.6703	-1.5214	-2.0441	-1.9611	0.4947	0.0638	5.252	0	3.6106	9.2103	5.2806
S151WTS025	Codilean et al. 2022	240.138		8.1296	5.7201	0.56486	0.7731	0.9231	4.8359	5.521	5.7348	108.111	143.941	186.566	6.08	6.5471	6.9555	0.3476	0.4985	0.5861	8.4214	5.696	4.7703	1.2956	91.17	85.9594	1.4165	-2.7181	0.7185	0.3227	1.4242	8.0892	7.8781	2.9043	3.4542	7.3275	5.3585	2.9043	-0.3098	-0.3407	-0.686	-0.7109	2.1993	92.401	2.152	0	4.6001	9.2103	4.6246
S151WTS026	Codilean et al. 2022	179.123		8.4227	5.7201	0.56486	0.7731	0.9231	4.8359	5.521	5.7348	108.111	143.941	186.566	6.08	6.5471	6.9555	0.3476	0.4985	0.5861	8.4214	5.696	4.7703	1.2956	91.17	85.9594	1.4165	-2.7181	0.7185	0.3227	1.4242	8.0892	7.8781	2.9043	3.4542	7.3275	5.3585	2.9043	-0.3098	-0.3407	-0.686	-0.7109	2.1993	92.401	2.152	0	4.6001	9.2103	4.6246
S230WTS011	Codilean et al. 2022	1396.76		6.3689	5.2588	0.50639	0.7275	0.8166	4.7514	5.5104	5.5917	105.243	144.245	182.886	5.8746	6.312	6.3357	0.3705	0.5313	0.596	4.7039	4.3055	3.4519	-0.4418	0	0.5505	0.4687	-1.8547	0.1885	0.2157	1.2755	6.5476	6.6618	1.768	3.0495	6.5952	5.2837	-0.8449	-0.4724	-0.4884	-1.0269	-1.0421	1.7941	16.5772	5.486	0.9869	6.2441	11.0441	5.938
S253WTS015	Codilean et al. 2022	262.684		8.0399	5.7302	0.52262	0.7641	0.9177	4.4721	5.324	5.4222	92.7714	130.92	164.342	5.4703	5.7869	5.9976	0.3265	0.481	0.6074	8.5416	5.7192	4.8054	1.1171	95.719	81.4718	1.4925	-2.7742	0.7045	0.343	1.4784	8.1559	7.7086	2.677	3.7049	7.1097	5.5915	2.5864	-0.4533	-0.527	-0.8911	-0.9236	2.057	8.0827	3.842	0.0509	2.3026	9.2103	4.6052
S253WTS014	Codilean et al. 2022	159.045		8.5416	5.7297	0.52276	0.7641	0.9177	4.4721	5.3242	5.4222	92.7714	130.92	164.342	5.4713	5.7869	5.9977	0.3265	0.481	0.6074	8.5416	5.7192	4.8054	1.1171	95.78	81.4718	1.4925	-2.7742	0.7045	0.343	1.4784	8.1559	7.7086	2.677	3.7049	7.11	5.5919	2.5864	-0.4533	-0.527	-0.8911	-0.9236	2.057	8.0857	3.84	0.0203	2.3026	9.2103	4.6052
S193WTS047	Codilean et al. 2022	2042.15		5.9891	5.5372	0.51309	0.7627	0.92	4.4351	5.3057	5.3569	86.9848	121.645	146.952	5.2036	5.4563	5.6091	0.3277	0.4833	0.5774	7.1717	4.9617	4.3442	0.2055	86.772	90.888	0.8754	-3.3843	0.5923	0.336	1.4073	6.9569	7.2293	2.1372	3.1397	6.7508	5.1877	1.1879	-0.5375	-0.1754	-1.0969	-0.9506	0.9052	3.1722	9.426	3.964	3.9303	9.2103	5.0911
S127WTS030	Codilean et al. 2022	31919.3		3.2399	5.7955	0.31223	0.5068	0.6313	4.3196	5.2278	5.3996	60.2617	80.5319	103.669	4.3124	4.4946	4.6875	0.2024	0.3037	0.3554	6.6206	4.616	4.1641	-0.7789	43.52	32.9113	0.92	-2.2614	0.5009	0.2226	1.3153	6.519	6.4847	-0.47	0.6971	4.9785	3.0945	-0.4393	-0.9881	-0.9798	-1.446	-1.4267	1.0536	0	7	0	2.3026	9.2103	4.6052
S071WTS044	Codilean et al. 2022	1928.16		6.0465	5.5625	0.42396	0.6891	0.7976	4.2142	5.22	5.2926	65.2463	98.4243	123.719	5.0532	5.5269	5.6177	0.2517	0.4015	0.5008	5.1641	4.3227	3.5055	-0.0636	0.23	24.7438	0	-1.5669	0.0813	0.2772	1.471	6.6173	6.7294	2.1699	3.0715	6.7636	5.1063	-0.7781	-1.0806	-0.3162	-1.4636	-1.0267	1.0523	36.679	5.915	2.7476	6.2554	11.4446	6.1057
S019WTS005	Codilean et al. 2022	5209.36		5.0526	5.3168	0.222	0.364	0.4485	3.3861	4.8752	4.9382	30.2937	46.5483	61.0798	3.8794	4.0059	4.6012	0.1164	0.1808	0.2352	7.152	4.5519	3.6441	-0.4541	98.972	97.0314	1.6278	-3.8922	0.7351	0.1996	1.3201	6.84	6.8298	1.3691	2.4089	6.2295	4.6523	0.7148	-0.0212	0.0969	-0.5379	-0.4332	2.0311	11.7014	6.541	0.5723	2.3026	9.2103	4.6052
S087WTS002	Codilean et al. 2022	204236		1.3838	5.4314	0.22094	0.3949	0.6	3.6267	4.9533	5.0534	36.2109	63.4528	86.1817	3.3742	3.5513	3.9613	0.1289	0.2312	0.3567	6.0717	4.3202	3.6819	-1.2191	75.86	0.1217	0.5688	-2.7181	0.352	0.1772	1.3231	6.135	6.3709	-0.9063	-0.251	4.9262	2.7764	-1.2607	-2.0675	-2.0675	-2.2018	-2.2027	0.4937	0	6.166	0	2.3026	9.2103	4.6052
S230WTS010	Codilean et al. 2022	5727.44		4.9578	5.2487	0.3017	0.5537	0.6535	4.1753	5.1306	5.2328	55.763	77.4132	94.0726	5.3234	5.5769	6.2083	0.2016	0.3033	0.3944	5.4116	4.3224	3.4489	-0.4306	0	1.3869	0.482	-2.1144	0.2848	0.1999	1.2424	6.7371	6.8283	1.8621	3.0894	6.6828	5.3279	-0.4425	-0.1903	-0.1371	-0.699	-0.658	1.6504	69.5956	3.824	0	5.3805	9.2103	5.6012
S022WTS014	Codilean et al. 2022	6742.51		4.7946	5.8893	0.20968	0.3517	0.4277	3.3556	4.8465	4.9047	28.8486	41.7476	52.4963	4.3643	4.7079	4.8151	0.1131	0.1763	0.2116	8.6232	5.1828	4.6584	0.6428	96.665	100	1.3507	-2.7887	0.5942	0.2952	1.4753	8.0053	7.9815	2.9724	3.6031	7.2699	5.3766	2.1713	-0.1316	0.0108	-0.6943	-0.5439	1.0387	100	2.216	0	2.3026	9.2103	4.6052
S064WTS006	Codilean et al. 2022	5329.63		5.0298	5.4879	0.5173	0.7676	0.9247	4.4471	5.3076	5.3569	88.0678	122.366	147.878	5.2138	5.4575	5.6106	0.3313	0.4849	0.5821	7.1717	4.9617	4.3442	0.2055	89.004	90.6068	0.8747	-3.4451	0.5914	0.336	1.4073	6.9522	7.2284	2.1372	3.1397	6.7819	5.2208	1.1848	-0.5108	-0.1754	-1.0782	-0.9506	0.9052	3.2928	9.478	3.9857	3.941	9.2103	5.1036
S179WTS008	Codilean et al. 2022	5045.2		5.0846	5.2426	0.24169	0.4185	0.4889	3.1408	4.7962	4.8255	28.4823	44.6269	54.4704	4.0495	4.3082	4.3653	0.12	0.1975	0.2412	7.9677	5.0144	3.9673	-0.1418	96.205	76.5967	0.986	-3.6306	0.6729	0.2047	1.4085	7.1025	7.2483	2.0624	3.0512	6.864	5.2954	1.1496	-0.1268	0.0074	-0.7	-0.5743	1.9235	25.5967	5.881	0	2.3026	9.2103	4.6052
S108WTS031	Codilean et al. 2022	609.171		7.1987	5.5935	0.51484	0.7799	1.0101	4.7402	5.5548	5.6189	100.245	145.248	188.981	5.5845	6.0297	6.2099	0.3483	0.5236	0.6627	5.379	4.2453	3.7241	-0.8491	17.466	30.9513	0.7501	-2.7742	0.1191	0.2732	1.4334	6.0063	6.7556	1.7651	2.7766	6.3956	4.8111	-1.2559	-0.5633	-0.486	-1.0636	-1.025	1.1172	99.9891	3.353	0	5.2843	13.4667	5.9498
S069WTS027	Codilean et al. 2022	1240.66		6.4874	4.7937	0.5544	0.8026	0.9239	4.8339	5.5826	5.6818	110.826	151.495	191.12	5.5369	6.1119	6.141	0.4303	0.6148	0.7084	6.5596	4.3935	3.5382	0.2591	22.423	52.2095	0.8519	-1.701	0.219	0.2669	1.3759	6.7764	6.809	1.5394	2.4059	6.6399	4.9422	-0.1049	-1.1734	-1.1718	-1.6246	-1.6246	0.6968	99.493	3.816	0.4101	5.8969	10.5813	5.9226
S064WTS007	Codilean et al. 2022	4464.47		5.2069	5.4712	0.6819	0.8723	1.0673	4.8459	5.6111	5.9663	83.8357	120.722	204.709	6.332	6.8433	7.3702	0.4584	0.6931	0.8158	6.8388	4.8972	4.285	0.3102	78.797	40.847	0.6959	-2.9997	0.4552	0.3224	1.3673	6.8771	7.3374	2.1519	3.1108	6.8054	5.2047	1.003	-0.4102	0.1304	-0.9455	-0.7284	0.9074	85.5437	3.347	1.2018	4.2893	9.2103	5.4312
S218WTS019	Codilean et al. 2022	141476		1.7509	5.7153	0.14929	0.3366	0.4583	3.1742	4.8041	4.849	21.6648	36.2706	48.5859	3.0133	3.309	3.3945	0.0926	0.1725	0.2338	5.735	4.1625	3.5814	-1.5241	1.096	8.2118	0.3461	-1.9885	0.2266	0.1643	1.2211	5.9539	5.8921	-1.4567	-0.3397	4.7659	2.6748	-2.2307	-1.8496	-1.8579	-2.1005	-2.1046	0.2705	99.2168	3.861	0	2.3026	9.2103	4.6052
S025WTS028	Codilean et al. 2022	2329.28		5.8575	5.8069	0.56235	0.7681	0.9415	5.0488	5.8099	5.9185	112.364	154.731	235.841	5.5098	6.1215	6.1794	0.3417	0.5026	0.5768	7.3856	4.4362	4.0139	-0.3092	27.051	25.1766	0.6631	-2.2219	0.3353	0.2896	1.4899	6.8212	7.0581	0.6334	1.7384	5.4668	3.7847	-0.0213	-0.5977	-0.6377	-1.0782	-1.1026	1.2193	31.7989	4.778	0	5.1938	10.7685	4.7739
S135WTS013	Codilean et al. 2022	17419.8		3.8455	5.885	0.18085	0.2849	0.3902	4.0744	5.1079	5.2016	40.7358	57.9509	82.5709	4.793	5.2722	5.3852	0.1258	0.1828	0.2257	6.1833	4.5453	3.8191	0.1105	81.111	7.1344	1.0112	-2.6824	0.5308	0.2323	1.2705	7.2235	7.1443	2.3076	2.7473	6.6712	4.5842	0.8823	-0.5902	-0.5508	-0.9902	-0.9491	1.4475	0	7	0	2.3026	9.2103	4.6052
S025WTS012	Codilean et al. 2022	4885.78		5.1167	5.8117	0.51687	0.7375	0.8565	4.6607	5.4488	5.6128	99.3729	132.3	169.456	5.1423	5.5545	5.636	0.3205	0.4526	0.5181	7.8998	4.7262	4.2179	-0.1001	85.806	85.4626	1.119	-2.6971	0.5685	0.2723	1.3972	7.1181	7.2262	1.1455	2.1122	5.7923	4.0824	0.8902	-0.4537	-0.4806	-0.9755	-0.9819	1.2107	0	6.001	0	2.3026	9.2103	4.6052
S023WTS009	Codilean et al. 2022	6506.19		4.8303	5.3469	0.09287	0.1823	0.3194	3.6758	5.0196	5.2313	24.7521	39.4286	65.2167	3.7178	3.9643	3.9901	0.0617	0.1084	0.1955	6.0014	4.0572	3.5335	-1.1194	31.809	35.237	0.3612	-2.5731	0.2772	0.1638	1.1172	6.1754	5.8369	-1.8839	-0.5906	4.7402	2.6775	-1.8376	-1.4359	-1.2773	-1.9078	-1.8116	0.5927	59.8833	4.666	2.484	3.4922	9.2103	5.2619
S023WTS026	Codilean et al. 2022	3670.89		5.4026	5.3048	0.03903	0.0659	0.1036	2.8679	4.7053	4.7138	7.4617	10.588	11.8819	2.8136	3.0252	3.0622	0.0231	0.0345	0.0476	5.926	3.8669	3.2478	-1.3437	0	0	0.2544	-2.2127	0.1691	0.1657	1.0975	5.9344	6.0197	-1.5654	-0.3682	4.7945	2.7642	-2.1337	-1.5683	-1.3205	-1.9668	-1.8091	0.4862	0	6.826	0	3.6598	9.2103	5.2993
S164WTS010	Codilean et al. 2022	24981.6		3.4849	5.8401	0.20808	0.4058	0.5718	4.0425	5.2062	5.3607	50.8883	86.0612	113.308	5.2234	5.663	5.8621	0.1451	0.2827	0.3927	8.0529	5.2449	4.6499	0.4537	80.05	95.8774	1.5891	-2.6927	0.6921	0.27	1.2602	7.8883	7.8165	2.7107	3.9074	7.0636	5.7058	2.1409	-1.3931	-1.3855	-1.8189	-1.8165	0.466	100	2	0	2.3026	9.2103	4.6052
S065WTS003	Codilean et al. 2022	32583		3.2193	5.495	0.0951	0.1748	0.3441	3.1097	4.7448	4.7669	16.1584	27.1577	36.6757	3.0416	3.1307	3.1695	0.0488	0.0828	0.1416	4.6461	3.9241	3.1764	-1.8408	0	0.0172	0	-0.4981	0.1046	0.1204	1.2655	5.4457	5.2882	-2.9759	-0.4573	4.6421	2.688	-3.3081	-0.9792	-0.8126	-1.4338	-1.2827	0.9454	0	11.106	4.6102	2.3026	9.2103	4.6052
S264WTS010	Codilean et al. 2022	6801.6		4.7859	5.3005	0.2657	0.4894	0.5964	3.3554	4.8548	4.8944	32.4158	49.121	60.4452	3.915	4.1604	4.2126	0.1393	0.2196	0.2831	7.6014	5.0771	4.3562	0.1253	72.569	91.4676	1.2151	-3.4112	0.6082	0.2777	1.5775	7.1356	7.036	1.7011	2.4574	6.5141	4.7063	1.0024	-1.1026	-1.1032	-1.5697	-1.5693	0.3004	65.6999	4.459	0	3.6152	9.2103	4.9735
S038WTS021	Codilean et al. 2022	116248		1.9473	5.6893	0.0635	0.1047	0.3381	2.9135	4.736	4.8015	17.2419	34.5288	54.0502	2.7609	2.9746	3.0076	0.0436	0.0886	0.2083	6.0363	4.2378	3.7767	-1.3428	1.032	12.6306	0.4311	-2.0003	0.2621	0.1404	1.1014	6.1862	6.2784	-1.5371	-0.3011	4.7566	2.6934	-1.6687	-1.8208	-1.7597	-2.0923	-2.0596	0.2705	48.58	5.723	2.0683	2.3026	9.2103	4.6052
S023WTS015	Codilean et al. 2022	7619.45		4.6724	5.312	0.11138	0.2129	0.3341	3.4569	4.8869	4.9959	22.1351	37.8813	52.3457	3.3943	3.5956	3.875	0.0701	0.1339	0.2078	5.6622	4.0575	3.5292	-1.3014	5.324	13.0117	0.294	-2.2682	0.2059	0.1593	1.1221	6.0411	5.8192	-1.7958	-0.5344	4.7558	2.7035	-2.1774	-1.4325	-1.3016	-1.8991	-1.8177	0.623	14.2005	5.734	2.7613	3.3307	9.2103	5.1688
S025WTS048	Codilean et al. 2022	3668.41		5.4033	5.7646	0.48436	0.7004	0.8263	4.5303	5.4506	5.5253	95.5218	126.939	158.344	4.5897	4.878	4.908	0.323	0.459	0.5286	7.4171	4.6392	4.1295	-0.1891	80.618	68.2706	1.5496	-2.6941	0.583	0.2517	1.3383	7.1044	7.122	0.7129	1.8905	5.5332	3.9304	0.7708	-0.6868	-0.6896	-1.1786	-1.1722	1.2116	0	6	0	2.3026	9.2103	4.6052
S086WTS026	Codilean et al. 2022	501.678		7.3929	5.5318	0.57893	0.8054	0.9869	5.1249	5.803	5.9108	131.861	185.238	255.721	6.4197	6.9051	6.9975	0.4278	0.6183	0.7388	6.6114	5.3412	4.6586	-0.033	46.064	62.0366	0.6682	-2.6187	0.4456	0.2118	1.2884	7.0877	7.9287	3.0999	4.2743	7.6428	6.2878	1.2235	-0.0484	-0.0978	-0.6669	-0.6868	1.6657	99.9999	3.615	0	6.5193	11.8291	5.3049
S101WTS007	Codilean et al. 2022	8768.02		4.532	5.3319	0.4826	0.7129	0.838	4.7874	5.5337	5.5925	90.6098	131.891	171.57	5.2124	5.7263	5.8206	0.3248	0.4929	0.5674	4.791	4.0581	3.4406	-1.6009	0	36.9773	0	-1.5804	0.0574	0.2548	1.3371	5.3026	5.9361	0.551	1.5533	5.6255	3.9089	-2.6926	-0.6336	-0.6404	-1.1147	-1.1166	1.0117	100	2	0	5.4609	10.145	6.0759
S102WTS006	Codilean et al. 2022	11272.7		4.2807	5.2677	0.39773	0.6544	0.7311	4.1813	5.1233	5.1695	61.4688	85.0708	100.71	3.424	3.7285	3.7487	0.2294	0.3551	0.4245	5.7724	3.6349	3.1151	-1.32	0	9.3522	0	-0.8841	0.0817	0.2044	1.209	5.6302	5.5447	-2.9957	-1.772	4.6472	2.4346	-2.7508	-0.7861	-0.3132	-1.2616	-0.9838	0.5579	2.5561	10.457	4.2581	3.6117	9.2103	5.8042
S064WTS012	Codilean et al. 2022	3685.83		5.3986	5.3867	0.6001	0.7632	0.9219	4.6379	5.4437	5.7701	99.817	136.511	175.887	5.482	6.0891	6.149	0.3457	0.5194	0.6287	6.6827	4.8613	4.2722	0.2651	86.856	55.8747	0.8103	-3.3496	0.537	0.3248	1.4736	6.8656	7.288	1.7412	2.6979	6.4986	4.8734	1.1395	-0.4265	0.2007	-0.9613	-0.7125	0.8951	25.2083	6.46	2.5929	4.243	9.2103	5.3328
S215WTS013	Codilean et al. 2022	534.574		7.3293	4.7042	0.57716	0.8756	1.0665	4.6219	5.509	5.5814	106.555	150.976	190.005	5.7909	6.1504	6.339	0.4171	0.6349	0.7575	6.516	4.6028	3.6786	0.5944	15.409	30.6714	0	-1.5311	0.1323	0.255	1.3595	7.1629	7.3936	2.3479	3.0334	7.4193	5.5824	0.4261	-1.068	-1.0295	-1.5469	-1.5191	0.7437	79.968	2.181	0.9032	6.962	12.539	6.0206
S009WTS062	Codilean et al. 2022	153465		1.6696	4.6193	0.04959	0.0873	0.1254	2.7109	4.6744	4.6869	6.7437	9.5658	13.0842	2.7707	2.8902	2.9319	0.0276	0.0445	0.0616	6.567	4.2592	3.5169	-0.0517	38.282	58.1895	1.1827	-2.4686	0.6316	0.2566	1.3907	6.7891	6.8483	0.6627	1.1148	5.9974	3.894	0.7676	-1.6665	-1.5526	-2.0174	-1.9519	0.3693	0	12	4.6151	2.3026	9.2103	4.6052
S215WTS004	Codilean et al. 2022	420.314		7.5698	4.7042	0.57716	0.8756	1.0665	4.6219	5.509	5.5814	106.555	150.976	190.005	5.7909	6.1504	6.339	0.4171	0.6349	0.7575	6.516	4.6028	3.6786	0.5944	15.409	30.6714	0	-1.5311	0.1323	0.255	1.3595	7.1629	7.3936	2.3479	3.0334	7.4193	5.5824	0.4261	-1.068	-1.0295	-1.5469	-1.5191	0.7437	79.968	2.181	0.9032	6.962	12.539	6.0206
S215WTS010	Codilean et al. 2022	534.574		7.3293	4.7042	0.57716	0.8756	1.0665	4.6219	5.509	5.5814	106.555	150.976	190.005	5.7909	6.1504	6.339	0.4171	0.6349	0.7575	6.516	4.6028	3.6786	0.5944	15.409	30.6714	0	-1.5311	0.1323	0.255	1.3595	7.1629	7.3936	2.3479	3.0334	7.4193	5.5824	0.4261	-1.068	-1.0295	-1.5469	-1.5191	0.7437	79.968	2.181	0.9032	6.962	12.539	6.0206
S215WTS011	Codilean et al. 2022	539.144		7.3208	4.7042	0.57716	0.8756	1.0665	4.6219	5.509	5.5814	106.555	150.976	190.005	5.7909	6.1504	6.339	0.4171	0.6349	0.7575	6.516	4.6028	3.6786	0.5944	15.409	30.6714	0	-1.5311	0.1323	0.255	1.3595	7.1629	7.3936	2.3479	3.0334	7.4193	5.5824	0.4261	-1.068	-1.0295	-1.5469	-1.5191	0.7437	79.968	2.181	0.9032	6.962	12.539	6.0206
S215WTS007	Codilean et al. 2022	374.615		7.6849	4.7042	0.57716	0.8756	1.0665	4.6219	5.509	5.5814	106.555	150.976	190.005	5.7909	6.1504	6.339	0.4171	0.6349	0.7575	6.516	4.6028	3.6786	0.5944	15.409	30.6714	0	-1.5311	0.1323	0.255	1.3595	7.1629	7.3936	2.3479	3.0334	7.4193	5.5824	0.4261	-1.068	-1.0295	-1.5469	-1.5191	0.7437	79.968	2.181	0.9032	6.962	12.539	6.0206
S215WTS014	Codilean et al. 2022	447.732		7.5066	4.7042	0.57716	0.8756	1.0665	4.6219	5.509	5.5814	106.555	150.976	190.005	5.7909	6.1504	6.339	0.4171	0.6349	0.7575	6.516	4.6028	3.6786	0.5944	15.409	30.6714	0	-1.5311	0.1323	0.255	1.3595	7.1629	7.3936	2.3479	3.0334	7.4193	5.5824	0.4261	-1.068	-1.0295	-1.5469	-1.5191	0.7437	79.968	2.181	0.9032	6.962	12.539	6.0206
S215WTS012	Codilean et al. 2022	612.279		7.1936	4.7042	0.57716	0.8756	1.0665	4.6219	5.509	5.5814	106.555	150.976	190.005	5.7909	6.1504	6.339	0.4171	0.6349	0.7575	6.516	4.6028	3.6786	0.5944	15.409	30.6714	0	-1.5311	0.1323	0.255	1.3595	7.1629	7.3936	2.3479	3.0334	7.4193	5.5824	0.4261	-1.068	-1.0295	-1.5469	-1.5191	0.7437	79.968	2.181	0.9032	6.962	12.539	6.0206
S103WTS001	Codilean et al. 2022	4970.72		5.0995	2.4415	0.4357	0.6369	0.7603	4.4197	5.2364	5.2936	73.0003	98.7488	117.553	5.4742	5.8356	5.8701	0.2631	0.3566	0.4216	7.1527	5.5285	4.7009	0.3702	42.781	75.0966	1.0089	-2.3497	0.6065	0.2726	1.3732	7.6213	7.6837	1.5156	2.6244	7.2339	5.8006	1.7402	0.0684	0.0361	-0.5413	-0.5485	1.7153	99.9998	2.737	0	2.3026	9.2103	4.6052
S215WTS001	Codilean et al. 2022	689.997		7.0741	4.7042	0.57716	0.8756	1.0665	4.6219	5.509	5.5814	106.555	150.976	190.005	5.7909	6.1504	6.339	0.4171	0.6349	0.7575	6.516	4.6028	3.6786	0.5944	15.409	30.6714	0	-1.5311	0.1323	0.255	1.3595	7.1629	7.3936	2.3479	3.0334	7.4193	5.5824	0.4261	-1.068	-1.0295	-1.5469	-1.5191	0.7437	79.968	2.181	0.9032	6.962	12.539	6.0206
S182WTS016	Codilean et al. 2022	7779.47		4.6516	2.8639	0.40345	0.5856	0.6747	3.9544	5.0357	5.0595	50.8465	66.8433	76.0338	4.5137	4.6962	4.7713	0.1927	0.2758	0.319	7.4544	4.722	4.2044	-0.136	53.476	99.3289	1.2369	-2.5396	0.621	0.3118	1.575	7.0619	7.1792	0.2445	1.2456	6.0872	4.4592	0.9594	-0.9465	-0.3981	-1.3276	-1.0544	0.823	0	7	0	2.3026	9.2103	4.6052
S215WTS006	Codilean et al. 2022	552.857		7.2957	4.7042	0.57716	0.8756	1.0665	4.6219	5.509	5.5814	106.555	150.976	190.005	5.7909	6.1504	6.339	0.4171	0.6349	0.7575	6.516	4.6028	3.6786	0.5944	15.409	30.6714	0	-1.5311	0.1323	0.255	1.3595	7.1629	7.3936	2.3479	3.0334	7.4193	5.5824	0.4261	-1.068	-1.0295	-1.5469	-1.5191	0.7437	79.968	2.181	0.9032	6.962	12.539	6.0206
S215WTS002	Codilean et al. 2022	653.425		7.1286	4.7042	0.57716	0.8756	1.0665	4.6219	5.509	5.5814	106.555	150.976	190.005	5.7909	6.1504	6.339	0.4171	0.6349	0.7575	6.516	4.6028	3.6786	0.5944	15.409	30.6714	0	-1.5311	0.1323	0.255	1.3595	7.1629	7.3936	2.3479	3.0334	7.4193	5.5824	0.4261	-1.068	-1.0295	-1.5469	-1.5191	0.7437	79.968	2.181	0.9032	6.962	12.539	6.0206
S215WTS005	Codilean et al. 2022	392.893		7.6373	4.7042	0.57716	0.8756	1.0665	4.6219	5.509	5.5814	106.555	150.976	190.005	5.7909	6.1504	6.339	0.4171	0.6349	0.7575	6.516	4.6028	3.6786	0.5944	15.409	30.6714	0	-1.5311	0.1323	0.255	1.3595	7.1629	7.3936	2.3479	3.0334	7.4193	5.5824	0.4261	-1.068	-1.0295	-1.5469	-1.5191	0.7437	79.968	2.181	0.9032	6.962	12.539	6.0206
S115WTS019	Codilean et al. 2022	840.571		6.8767	2.0281	0.52916	0.7274	0.86	4.9008	5.4916	5.5176	113.5	148.67	176.556	5.5196	5.7422	5.817	0.3885	0.5204	0.5977	5.7684	4.6159	3.9726	-0.3572	93.307	97.0857	1.2714	-3.4641	0.596	0.2812	1.3767	6.762	6.5581	0.2662	1.3473	6.1734	4.6292	0.193	-0.4273	-0.4236	-0.9532	-0.9488	1.1692	97.9988	2.16	0	4.2346	9.2103	5.0937
S215WTS003	Codilean et al. 2022	415.742		7.5808	4.7042	0.57716	0.8756	1.0665	4.6219	5.509	5.5814	106.555	150.976	190.005	5.7909	6.1504	6.339	0.4171	0.6349	0.7575	6.516	4.6028	3.6786	0.5944	15.409	30.6714	0	-1.5311	0.1323	0.255	1.3595	7.1629	7.3936	2.3479	3.0334	7.4193	5.5824	0.4261	-1.068	-1.0295	-1.5469	-1.5191	0.7437	79.968	2.181	0.9032	6.962	12.539	6.0206
S253WTS019	Codilean et al. 2022	985.846		6.7173	2.8142	0.54105	0.7955	1.006	4.3113	5.32	5.4495	100.097	147.971	169.543	5.2606	5.6586	5.7991	0.3845	0.5879	0.7258	8.5532	5.6885	4.8047	1.1736	94.424	76.1176	1.3276	-2.763	0.6751	0.3314	1.5936	8.2763	7.6682	1.5003	2.5747	7.1776	5.7084	2.5182	-0.3438	-0.3052	-0.9246	-0.8896	1.9157	0	4	0	2.3026	9.2103	4.6052
S183WTS014	Codilean et al. 2022	964.504		6.7392	5.493	0.6759	0.869	1.0632	5.0882	5.7473	5.9638	127.551	175.364	249.358	6.7504	7.2939	7.6782	0.4542	0.6871	0.8091	6.5736	5.0264	4.3822	0.0018	40.759	31.9075	1.0302	-2.4407	0.3509	0.2333	1.3153	7.0436	7.9328	3.4699	4.6537	8.0247	6.6886	1.0066	0.0101	-0.0763	-0.6127	-0.669	1.6466	100	3.734	0	6.32	11.7107	5.5136
S183WTS013	Codilean et al. 2022	2040.77		5.9897	5.493	0.6759	0.869	1.0632	5.0882	5.7473	5.9638	127.551	175.364	249.358	6.7504	7.2939	7.6782	0.4542	0.6871	0.8091	6.5736	5.0264	4.3822	0.0018	40.759	31.9075	1.0302	-2.4407	0.3509	0.2333	1.3153	7.0436	7.9328	3.4699	4.6537	8.0247	6.6886	1.0066	0.0101	-0.0763	-0.6127	-0.669	1.6466	100	3.734	0	6.32	11.7107	5.5136
S082WTS037	Codilean et al. 2022	1338.4		6.4116	5.5706	0.38008	0.6123	0.7104	4.4506	5.3441	5.4975	73.7785	108.601	136.038	4.6965	5.054	5.2396	0.2493	0.4131	0.4966	6.4312	4.4217	4.0639	-1.4359	13.762	1.6298	0.6608	-2.2018	0.3207	0.2529	1.2514	5.8493	6.7061	0.2964	1.5289	5.3762	3.759	-1.2201	-0.6192	-0.6083	-1.1625	-1.1236	1.0192	38.9632	6.853	3.019	3.1746	9.2103	4.6913
S215WTS008	Codilean et al. 2022	356.335		7.7349	4.696	0.5778	0.8763	1.0668	4.6283	5.5108	5.5822	106.426	150.922	190.714	5.7863	6.1359	6.3395	0.4174	0.6355	0.7575	6.516	4.6028	3.6786	0.595	14.989	30.8017	0	-1.5269	0.1299	0.255	1.3595	7.162	7.3936	2.3479	3.0334	7.4233	5.5865	0.4203	-1.068	-1.0295	-1.5469	-1.5191	0.7433	79.9778	2.169	0.866	6.9645	12.5432	6.0239
S253WTS016	Codilean et al. 2022	832.678		6.8862	2.807	0.54138	0.7956	1.006	4.3178	5.3211	5.4495	100.322	148.017	169.722	5.2635	5.6601	5.7993	0.3845	0.5879	0.7258	8.5532	5.6885	4.8047	1.1736	94.566	76.1176	1.3276	-2.7646	0.6751	0.3314	1.5936	8.2763	7.6682	1.5003	2.5747	7.1785	5.7094	2.5182	-0.3438	-0.3053	-0.9246	-0.8896	1.9157	0	4	0	2.3026	9.2103	4.6052
S215WTS009	Codilean et al. 2022	383.753		7.6608	4.696	0.5778	0.8763	1.0668	4.6283	5.5108	5.5822	106.426	150.922	190.714	5.7863	6.1359	6.3395	0.4174	0.6355	0.7575	6.516	4.6028	3.6786	0.595	14.989	30.8017	0	-1.5269	0.1299	0.255	1.3595	7.162	7.3936	2.3479	3.0334	7.4233	5.5865	0.4203	-1.068	-1.0295	-1.5469	-1.5191	0.7433	79.9778	2.169	0.866	6.9645	12.5432	6.0239
S108WTS037	Codilean et al. 2022	1203.55		6.5178	0.9282	0.36343	0.6144	0.7791	4.4236	5.2926	5.4016	58.0696	87.0701	129.092	4.9301	5.1124	5.625	0.1913	0.2917	0.3955	6.2357	4.3892	3.8649	-0.7991	18.735	11.8582	0.6746	-2.3549	0.1873	0.2763	1.433	6.1076	6.989	0.2585	1.3164	6.2056	4.6448	-0.8398	-0.5145	-0.4419	-1.0356	-0.975	1.1112	100	2	0	5.132	10.2262	5.8915
S193WTS004	Codilean et al. 2022	1513.31		6.2888	5.3935	0.61447	0.7631	0.9228	4.6425	5.4438	5.7703	99.3203	136.394	175.628	5.4888	6.0909	6.1493	0.3454	0.5204	0.6318	6.6827	4.8613	4.2722	0.2668	87.04	55.3043	0.81	-3.3524	0.5364	0.3248	1.4736	6.8651	7.2932	1.7412	2.6979	6.4946	4.8691	1.1437	-0.4265	0.2007	-0.9613	-0.7125	0.8951	25.487	6.444	2.5809	4.2451	9.2103	5.3394
S193WTS005	Codilean et al. 2022	968.137		6.7354	5.3935	0.61447	0.7631	0.9228	4.6425	5.4438	5.7703	99.3203	136.394	175.628	5.4888	6.0909	6.1493	0.3454	0.5204	0.6318	6.6827	4.8613	4.2722	0.2668	87.04	55.3043	0.81	-3.3524	0.5364	0.3248	1.4736	6.8651	7.2932	1.7412	2.6979	6.4946	4.8691	1.1437	-0.4265	0.2007	-0.9613	-0.7125	0.8951	25.487	6.444	2.5809	4.2451	9.2103	5.3394
S139WTS022	Codilean et al. 2022	19769.5		3.7189	4.7679	0.1411	0.2516	0.3372	3.3775	4.8407	4.8793	21.5106	31.1494	40.9288	3.8094	4.0415	4.0456	0.0735	0.1166	0.1466	6.8094	4.4316	3.7221	0.0897	64.539	63.5152	1.2947	-2.7646	0.6446	0.2848	1.3744	6.9997	6.9552	0.854	1.239	6.0847	3.9316	1.0009	-1.2379	-1.2539	-1.7574	-1.7655	0.47	99.9999	2	0	4.1163	9.2103	4.7141
S125WTS002	Codilean et al. 2022	3233.99		5.5293	5.3261	0.49149	0.7106	0.7885	4.7842	5.4562	5.5728	99.3946	130.982	160.127	5.4596	5.6562	5.721	0.3684	0.5126	0.5915	5.8249	4.5462	3.7208	-0.818	0	1.5188	0.0694	-1.4275	0.071	0.2146	1.4775	6.177	5.7755	1.3714	2.0708	6.2263	4.3461	-2.1981	-0.2309	-0.2689	-0.7963	-0.8246	1.4549	14.1169	7.249	0	6.5306	10.45	6.0658
S193WTS007	Codilean et al. 2022	591.57		7.228	5.3687	0.72135	0.8936	1.0937	4.6737	5.6261	5.9507	84.3524	128.044	181.012	5.8814	6.185	6.5123	0.4855	0.7327	0.8597	6.885	4.7973	4.169	0.3544	74.684	26.6961	0.7313	-2.8788	0.4386	0.311	1.3421	6.8552	7.349	1.4861	2.4319	6.296	4.6413	1.0034	-0.4036	0.1895	-0.9345	-0.7034	0.9472	65.0576	4.132	1.3178	4.5685	9.2103	5.5806
S193WTS006	Codilean et al. 2022	473.672		7.4503	5.3687	0.72135	0.8936	1.0937	4.6737	5.6261	5.9507	84.3524	128.044	181.012	5.8814	6.185	6.5123	0.4855	0.7327	0.8597	6.885	4.7973	4.169	0.3544	74.684	26.6961	0.7313	-2.8788	0.4386	0.311	1.3421	6.8552	7.349	1.4861	2.4319	6.296	4.6413	1.0034	-0.4036	0.1895	-0.9345	-0.7034	0.9472	65.0576	4.132	1.3178	4.5685	9.2103	5.5806
S220WTS015	Codilean et al. 2022	6903.01		4.7711	4.7897	0.26911	0.4385	0.5307	3.0269	4.8099	4.8546	26.886	42.1308	52.3583	4.0432	4.4625	4.691	0.1185	0.1831	0.2325	8.1027	4.9341	3.8228	0.924	100	93.7709	1.514	-3.5543	0.7697	0.2247	1.3591	7.8059	7.6815	2.5618	3.357	7.5782	5.8512	2.5859	-0.3054	-0.2473	-1.1366	-1.0909	1.2315	0.5971	6.97	0	2.3026	9.2103	4.6052
S164WTS056	Codilean et al. 2022	42354.5		2.957	3.4177	0.26146	0.47	0.6619	4.4365	5.5618	5.7901	62.0862	107.239	169.847	5.3998	5.9466	6.1063	0.171	0.3088	0.477	7.7343	4.834	4.5362	-0.1451	64.433	45.1613	1.3834	-2.522	0.6513	0.2522	1.4053	7.1587	7.1589	-0.009	1.1291	5.8207	4.266	1.0141	-1.2283	-1.241	-1.7401	-1.751	0.4479	100	2	0	2.3026	9.2103	4.6052
S064WTS008	Codilean et al. 2022	1302.26		6.439	5.3741	0.6994	0.8818	1.0791	4.6761	5.6265	5.9508	83.8058	127.978	180.698	5.9129	6.1998	6.5637	0.4704	0.7107	0.8353	6.885	4.7973	4.169	0.3556	75.071	26.2372	0.7312	-2.8842	0.4399	0.311	1.3421	6.8548	7.3465	1.4861	2.4319	6.2929	4.638	1.0055	-0.4036	0.216	-0.9345	-0.6777	0.9472	65.9801	4.082	1.3073	4.5601	9.2103	5.5856
S022WTS002	Codilean et al. 2022	5802.06		4.9449	5.7255	0.23058	0.3534	0.43	3.3486	4.8412	4.9153	29.3334	42.1066	52.8868	4.338	4.7242	4.828	0.1153	0.1779	0.2145	8.6822	5.1921	4.6648	0.6549	96.678	100	1.3585	-2.7887	0.5883	0.2952	1.4753	8.0153	7.9906	2.8598	3.4796	7.2822	5.3789	2.173	-0.1254	0.0185	-0.6913	-0.5365	1.0387	100	2.185	0	2.3026	9.2103	4.6052
S183WTS016	Codilean et al. 2022	2217.41		5.9067	5.4494	0.68543	0.8742	1.0697	5.1059	5.7481	5.9662	128.985	177.537	252.606	6.7816	7.3452	7.7202	0.4608	0.6967	0.8197	6.5736	5.0264	4.3822	-0.0161	40.106	31.3023	1.0259	-2.4384	0.3419	0.2458	1.356	7.0161	7.9345	3.0905	4.2741	7.6894	6.3448	0.971	0.0101	-0.0763	-0.6127	-0.669	1.6466	99.9999	3.725	0	6.32	11.7389	5.5324
S009WTS011	Codilean et al. 2022	27623.7		3.3844	4.1846	0.18341	0.2829	0.3569	3.5458	4.8983	4.9349	31.6556	44.2931	55.2256	3.8397	4.2024	4.239	0.1381	0.2068	0.2543	6.7224	4.4001	3.5669	0.5465	81.761	94.4526	1.2402	-2.9546	0.5661	0.2743	1.3348	7.158	7.1135	0.7752	1.6943	6.2376	4.5539	1.2802	-1.9372	-1.9442	-2.1278	-2.1303	0.3819	99.9997	2	0	5.5055	9.2103	5.6062
S183WTS015	Codilean et al. 2022	1913.72		6.054	5.4494	0.68543	0.8742	1.0697	5.1059	5.7481	5.9662	128.985	177.537	252.606	6.7816	7.3452	7.7202	0.4608	0.6967	0.8197	6.5736	5.0264	4.3822	-0.0161	40.106	31.3023	1.0259	-2.4384	0.3419	0.2458	1.356	7.0161	7.9345	3.0905	4.2741	7.6894	6.3448	0.971	0.0101	-0.0763	-0.6127	-0.669	1.6466	99.9999	3.725	0	6.32	11.7389	5.5324
S009WTS010	Codilean et al. 2022	30762.6		3.2768	4.1846	0.18341	0.2829	0.3569	3.5458	4.8983	4.9349	31.6556	44.2931	55.2256	3.8397	4.2024	4.239	0.1381	0.2068	0.2543	6.7224	4.4001	3.5669	0.5465	81.761	94.4526	1.2402	-2.9546	0.5661	0.2743	1.3348	7.158	7.1135	0.7752	1.6943	6.2376	4.5539	1.2802	-1.9372	-1.9442	-2.1278	-2.1303	0.3819	99.9997	2	0	5.5055	9.2103	5.6062
S193WTS008	Codilean et al. 2022	831.887		6.8871	5.358	0.72224	0.894	1.0943	4.6775	5.6265	5.9508	84.3957	128.078	181.124	5.8896	6.1893	6.5179	0.4862	0.7336	0.8607	6.885	4.7973	4.169	0.3553	74.662	26.3692	0.7314	-2.8788	0.4379	0.311	1.3421	6.8548	7.349	1.4861	2.4319	6.3019	4.6479	1.0022	-0.4036	0.216	-0.9345	-0.6777	0.9472	65.0576	4.135	1.3232	4.5685	9.2103	5.5849
S071WTS038	Codilean et al. 2022	52371.5		2.7447	5.4124	0.41643	0.6389	0.7124	4.3504	5.3256	5.5821	68.2323	100.8	134.228	5.0381	5.4685	5.8029	0.2434	0.3857	0.4667	5.7017	4.1039	3.3799	-0.178	13.834	15.7907	0.2769	-2.0227	0.179	0.2838	1.4546	6.5724	6.2978	0.7115	1.7378	5.6948	4.0142	-0.9807	-0.7877	-0.551	-1.2504	-1.1372	0.8049	97.1584	2.114	0	4.1104	9.2103	5.8125
S057WTS003	Codilean et al. 2022	794.373		6.9333	4.7288	0.53315	0.7841	1.0281	4.6035	5.4612	5.5906	101.893	155.342	207.266	5.154	5.5843	5.6012	0.3663	0.5939	0.7488	6.1781	4.395	3.5005	0.5479	9.357	14.8775	0.4851	-1.5717	0.182	0.2594	1.4334	7.306	7.0643	1.2843	2.0773	6.4509	4.6724	0.2378	-1.0073	-0.9999	-1.5006	-1.4961	0.6997	39.4863	6.959	3.9674	6.7287	11.0936	6.0116
S207WTS012	Codilean et al. 2022	277.446		7.9852	4.5812	0.41495	0.7876	1.0191	4.5574	5.4961	5.6511	83.5228	114.843	154.851	5.732	6.4356	6.5637	0.3322	0.53	0.6392	6.8237	4.6539	3.729	0.3661	2.167	12.9063	0.8626	-1.7504	0.0435	0.2598	1.3614	6.8216	7.1826	2.1616	2.826	7.3033	5.4434	-0.1604	-0.9026	-0.8219	-1.3972	-1.344	0.8109	45.6262	2.115	0.4243	7.5405	14.7459	6.107
S151WTS010	Codilean et al. 2022	590.358		7.2301	5.4979	0.57493	0.7979	0.9189	4.5043	5.3535	5.4001	99.7287	130.499	155.447	5.4891	5.9187	6.0666	0.3575	0.5143	0.5827	8.3945	5.7064	4.7543	0.9851	94.986	71.6327	1.6752	-2.7662	0.7424	0.3379	1.316	7.9497	7.8133	2.7134	3.3588	7.301	5.4227	2.6743	-0.281	-0.2779	-0.7211	-0.7097	2.0739	0	5.139	0	2.3026	9.2103	4.6052
S165WTS041	Codilean et al. 2022	1464.36		6.3216	4.7336	0.21953	0.3564	0.4686	3.7092	4.9417	5.0129	36.5848	50.3925	63.2908	4.29	4.6403	4.7582	0.1556	0.2238	0.2714	6.9377	4.6951	4.0062	0.2396	65.959	68.8227	1.2744	-2.779	0.6057	0.2657	1.5087	7.244	6.9718	1.1049	1.6814	6.2996	4.3181	1.028	-0.4166	-0.2913	-0.8985	-0.8158	1.1156	0	12	4.6151	3.5946	9.2103	4.6052
S193WTS027	Codilean et al. 2022	1503.2		6.2955	3.3499	0.81279	0.9403	1.1524	4.8999	5.6165	6.079	81.2087	114.383	194.078	5.9831	6.1084	6.235	0.5485	0.8245	0.9615	6.8276	4.8402	4.226	0.3124	80.304	30.8232	0.7141	-3.064	0.4499	0.3257	1.4004	6.8648	7.3307	0.8154	1.7622	6.4809	4.8465	0.9851	-0.4187	0.1286	-0.9553	-0.743	0.9112	99.9997	2.555	0	4.2289	9.2103	5.5016
S235WTS008	Codilean et al. 2022	13691.2		4.0863	5.3615	0.11037	0.256	0.4472	3.3956	4.8731	4.934	25.9977	44.7493	66.4476	3.6224	3.9173	3.9837	0.0795	0.1589	0.2857	5.8853	4.2786	3.5162	-1.5477	0	0.1241	0.1881	-0.9133	0.1436	0.1698	1.1536	5.9148	5.9715	-0.1132	1.2018	5.2418	3.6232	-2.397	-0.2963	-0.1978	-0.8271	-0.7361	1.3428	0	11.418	4.4595	2.3026	9.2103	4.6052
S183WTS001	Codilean et al. 2022	897.843		6.8108	5.3621	0.7	0.8822	1.0795	5.1323	5.7578	5.9702	131.733	179.622	262.34	6.8137	7.4026	7.7669	0.4708	0.7113	0.836	6.5736	5.0264	4.3822	-0.0472	37.818	30.1449	1.0173	-2.4113	0.3277	0.2467	1.3591	6.9687	7.9289	3.0241	4.2088	7.6836	6.3399	0.9055	0.0101	-0.0763	-0.6127	-0.669	1.6466	99.9999	3.709	0	6.32	11.7945	5.5697
S082WTS036	Codilean et al. 2022	2761.72		5.6872	5.443	0.37174	0.6053	0.7069	4.4673	5.3581	5.5193	72.7883	108.257	135.35	4.6652	5.0664	5.2504	0.245	0.4139	0.4975	6.367	4.4038	4.0415	-1.4581	10.177	0.0047	0.5794	-2.1893	0.3015	0.2529	1.2567	5.8276	6.7064	0.2964	1.5289	5.4259	3.8293	-1.2868	-0.6192	-0.6083	-1.1625	-1.1236	1.0192	40.0551	6.901	3.1055	3.1746	9.2103	4.6996
S104WTS001	Codilean et al. 2022	1722.98		6.159	-0.8675	0.4761	0.6605	0.745	4.4095	5.2577	5.3033	81.8777	101.764	118.368	5.4441	5.5759	5.5933	0.2993	0.4055	0.4379	8.1007	5.4368	4.6649	0.3445	39.198	34.6691	1.0121	-2.3177	0.5386	0.231	1.4554	7.6408	7.704	0.7547	2.0655	6.6402	5.363	1.561	-0.2065	-0.3014	-0.8637	-0.9388	1.5714	0	7.088	3.8065	4.2289	9.2103	4.6294
S220WTS016	Codilean et al. 2022	7110.82		4.7414	4.6503	0.2444	0.3929	0.4713	2.8728	4.7455	4.8202	21.2112	32.8657	40.9877	3.8025	4.2202	4.3991	0.0992	0.1538	0.1945	8.1953	4.8869	3.807	0.9021	99.967	96.5387	1.5192	-3.5614	0.7592	0.2295	1.3827	7.7795	7.7555	2.5162	3.3088	7.6049	5.8759	2.6053	-0.3255	-0.2497	-1.1489	-1.0815	1.2152	0.5922	6.973	0.0383	2.3026	9.2103	4.6052
S111WTS021	Codilean et al. 2022	1747.59		6.1448	5.3812	0.41789	0.5874	0.7023	4.6843	5.38	5.4381	93.6708	124.603	156.288	5.7237	6.0803	6.1654	0.3132	0.4241	0.4733	6.3583	5.3847	4.5845	0.3323	49.516	49.0195	0.9283	-2.4974	0.6109	0.2563	1.3967	7.5728	7.5462	6.3418	7.3701	10.9433	9.4713	1.6048	-0.0168	-0.0645	-0.5843	-0.611	1.6072	100	4	0	3.4105	9.2103	4.6397
S086WTS005	Codilean et al. 2022	1390.66		6.3733	5.3463	0.42009	0.616	0.7404	4.6697	5.5211	5.6448	88.0359	124.656	164.025	5.8258	6.1467	6.7864	0.3001	0.4437	0.5144	6.7466	5.406	4.6841	0.155	47.791	57.4545	0.9162	-2.4024	0.563	0.2245	1.249	7.3841	7.9254	2.9677	4.1323	7.64	6.2753	1.67	0.0302	0.0356	-0.5836	-0.5623	1.6758	96.4609	4	0	4.4981	9.2103	4.8226
S264WTS005	Codilean et al. 2022	16546.2		3.8969	5.0295	0.3328	0.5634	0.6573	3.7602	4.9751	5.0126	45.8028	63.3824	76.5794	4.1977	4.475	4.6827	0.1787	0.2628	0.3151	7.8299	5.2606	4.4916	0.243	59.073	97.6585	1.3096	-3.1559	0.6291	0.286	1.6729	7.2169	7.1707	1.5798	2.471	6.5575	4.8768	1.2622	-1.1914	-1.1934	-1.6089	-1.6099	0.412	88.1851	3.201	2.5506	4.1815	9.2103	5.209
S159WTS019	Codilean et al. 2022	48390.7		2.8238	5.6863	0.11699	0.2647	0.3997	3.5996	5.0139	5.1407	27.0254	49.3638	69.8285	4.1456	4.8619	4.8734	0.0695	0.1321	0.2187	7.2165	4.4074	4.0502	-1.1696	0	6.6537	0.5602	-1.521	0.2169	0.219	1.2434	6.2335	6.0526	0.4555	1.2975	5.4172	3.5253	-1.8481	-1.6734	-1.5649	-2.0122	-1.9456	0.4737	93.1069	3.574	2.066	2.3026	9.2103	4.6052
S261WTS044	Codilean et al. 2022	2757.33		5.6888	5.0012	0.20297	0.3888	0.5328	3.6394	4.8991	4.9671	29.0309	42.3266	52.5835	3.3887	3.6236	3.6424	0.0991	0.1589	0.2069	5.6524	3.9626	3.3134	-1.2663	6.102	9.2616	0.3531	-2.2682	0.2204	0.1501	1.0639	6.0098	6.0805	-1.8389	-0.596	4.7784	2.7499	-1.8888	-1.039	-0.9168	-1.596	-1.4877	0.6961	0	8.715	3.6283	4.0423	9.2103	5.4759
S096WTS014	Codilean et al. 2022	1998.04		6.0109	4.5952	0.4723	0.6775	0.828	4.2639	5.2792	5.3499	83.7881	115.387	139.52	4.7549	4.9874	5.0094	0.3347	0.4791	0.5707	5.8302	4.4995	3.5519	0.322	16.496	33.9024	0.6068	-1.9331	0.2689	0.2639	1.3532	7.1487	6.7785	1.2176	2.0643	6.4524	4.723	0.047	-0.8278	-0.8072	-1.3394	-1.3209	0.9959	100	2.043	0	5.6041	9.2103	5.8713
S209WTS004	Codilean et al. 2022	12544.6		4.1738	5.3957	0.2452	0.5443	0.6947	4.1322	5.2823	5.4356	52.2775	91.009	130.849	5.7116	6.3622	6.6983	0.1582	0.3337	0.4115	9.4016	5.8888	4.7387	1.6865	24.207	60.442	1.2484	-2.2118	0.6439	0.2779	1.2113	8.8911	8.997	3.9457	4.9474	8.5547	7.0465	3.9674	0.0501	0.1405	-0.4759	-0.3674	1.4798	100	2	0	2.3026	9.2103	4.6052
S146WTS008	Codilean et al. 2022	4113.79		5.2887	4.7831	0.22394	0.3823	0.4671	3.4599	4.8384	4.8772	29.4784	41.8136	62.1885	3.9621	4.2515	4.3161	0.1248	0.1846	0.275	7.0481	4.7815	3.8168	0.5297	56.201	79.1449	1.5977	-2.5797	0.7137	0.2654	1.4321	7.5095	7.338	2.0844	2.4977	7.1346	5.0333	1.8448	-0.3942	-0.2193	-0.8214	-0.6568	1.6596	6.5528	11.334	4.5291	4.9579	9.2103	4.6183
S082WTS024	Codilean et al. 2022	2191.36		5.9185	5.3934	0.37503	0.6043	0.6995	4.2118	5.1702	5.222	60.7687	86.2798	110.55	4.5063	4.735	4.7749	0.2083	0.3307	0.4055	6.1753	4.4464	4.0916	-1.3602	47.26	12.7319	0.8845	-2.3056	0.4794	0.2399	1.2556	5.9169	6.8662	-0.0141	1.2185	5.2795	3.6195	-0.6113	-0.6706	-0.7651	-1.2006	-1.2535	1.02	4.7727	9.226	3.3115	2.3026	9.2103	4.6052
S164WTS009	Codilean et al. 2022	19337.9		3.741	5.6132	0.22727	0.4683	0.6573	4.1543	5.2731	5.3837	54.4803	87.1401	130.641	5.5378	6.1712	6.4852	0.1466	0.2968	0.3967	8.3723	5.2793	4.6538	0.7286	84.127	95.02	1.5808	-2.7016	0.701	0.291	1.3967	8.1488	7.9787	2.8542	4.1112	7.3549	6.0703	2.5127	-1.4645	-1.4221	-1.8682	-1.827	0.3712	99.9999	2	0	2.3026	9.2103	4.6052
S026WTS008	Codilean et al. 2022	61688.1		2.581	4.8229	0.08059	0.143	0.2951	2.8535	4.7283	4.786	15.6953	29.4057	37.4781	3.3985	3.7493	3.9665	0.0469	0.1027	0.165	7.1102	4.5616	3.9232	0.0162	62.896	44.8818	1.0368	-2.9004	0.5172	0.2852	1.4602	7.0202	7.0573	1.3576	2.4977	6.4698	5.0127	0.7003	-1.9783	-1.9345	-2.1646	-2.1473	0.2096	1.5149	10.445	4.2794	4.741	9.2103	5.392
S209WTS011	Codilean et al. 2022	12429.8		4.183	5.3862	0.4369	0.7227	0.8524	4.3305	5.2729	5.3878	80.7033	111.566	139.685	5.9851	6.3595	6.7769	0.2771	0.4292	0.4973	9.2775	5.991	4.7776	1.5143	39.671	78.1614	1.4473	-2.4135	0.69	0.3131	1.5432	8.7241	8.9857	4.0388	5.0243	8.6526	7.1292	3.9466	0.0606	0.0903	-0.4711	-0.4227	1.5138	74.6912	4.205	0	2.3026	9.2103	4.6052
S057WTS012	Codilean et al. 2022	1470.04		6.3178	4.5744	0.65614	0.8773	1.0458	4.4984	5.3979	5.5483	122.053	162.262	204.303	4.9464	5.1634	5.2143	0.4622	0.6484	0.725	6.1526	4.4246	3.537	0.4351	18.194	38.3086	0.6586	-1.8055	0.2626	0.2665	1.3502	7.2713	7.0857	1.4658	2.3503	6.6749	4.9965	0.3803	-1.0147	-1.0142	-1.5141	-1.5141	0.6488	89.0692	3.016	2.4791	6.3685	9.8126	5.8966
S139WTS019	Codilean et al. 2022	15416.2		3.9676	4.5386	0.25156	0.4076	0.4672	3.7451	4.9403	4.9622	37.1689	51.5957	62.8027	3.8951	4.0899	4.1709	0.1353	0.206	0.2408	6.8104	4.5158	3.7962	0.0547	62.845	82.5873	1.2695	-2.8735	0.629	0.2775	1.3536	7.0099	6.9795	0.9345	1.325	6.2412	4.0984	0.9544	-1.2563	-1.273	-1.7655	-1.7737	0.4669	100	2	0	4.0302	9.2103	4.6453
S037WTS035	Codilean et al. 2022	1698.63		6.1732	4.4379	0.68969	0.8913	1.0826	4.4911	5.3893	5.4616	115.434	161.207	196.228	5.5091	5.7476	6.1779	0.4505	0.6744	0.7796	7.2628	4.9137	4.0026	0.5423	30.505	48	1.0963	-2.221	0.3631	0.2781	1.4723	7.332	7.5781	2.1337	2.7232	7.3409	5.4103	1.1463	-1.2581	-1.215	-1.7048	-1.6713	0.5766	95.904	2.377	1.5372	5.9405	9.2103	5.7359
S037WTS036	Codilean et al. 2022	1719.49		6.161	4.4379	0.68969	0.8913	1.0826	4.4911	5.3893	5.4616	115.434	161.207	196.228	5.5091	5.7476	6.1779	0.4505	0.6744	0.7796	7.2628	4.9137	4.0026	0.5423	30.505	48	1.0963	-2.221	0.3631	0.2781	1.4723	7.332	7.5781	2.1337	2.7232	7.3409	5.4103	1.1463	-1.2581	-1.215	-1.7048	-1.6713	0.5766	95.904	2.377	1.5372	5.9405	9.2103	5.7359
S141WTS002	Codilean et al. 2022	34632.4		3.1583	5.1376	0.27612	0.4626	0.585	3.9936	5.1831	5.3187	54.4533	78.4572	116.798	5.0318	5.5637	5.921	0.1999	0.307	0.3935	4.7959	3.9148	3.2987	-1.2347	0	7.0267	0	-1.2053	0.0519	0.2676	1.4469	5.6205	6.1193	1.8904	3.0109	6.7707	5.3211	-2.2707	-0.4472	-0.4271	-0.9715	-0.9519	1.2059	52.3334	7.802	3.885	5.6668	9.9265	6.1249
S200WTS002	Codilean et al. 2022	836.249		6.8819	3.736	0.40328	0.6467	0.777	4.8725	5.5417	5.6015	92.4081	126.027	171.952	5.6624	5.935	6.0567	0.3078	0.4149	0.4791	6.7719	4.3599	3.6235	0.0995	33.197	65.6943	1.0406	-2.4722	0.3174	0.2686	1.3598	6.8067	7.0486	1.0709	1.9003	6.6155	4.8825	0.2355	-0.3917	0.0168	-0.8533	-0.6856	1.9515	88.0872	2.853	0	5.3529	10.1491	5.809
S149WTS019	Codilean et al. 2022	22030.3		3.6106	5.6112	0.14671	0.255	0.3654	3.1871	4.8225	4.8865	21.304	33.9712	50.5555	3.9421	4.3706	4.572	0.0656	0.1093	0.1896	8.1416	5.2548	4.6732	0.5945	75.521	93.8688	1.3486	-2.5588	0.6238	0.3202	1.6317	7.991	7.9687	2.3135	3.0449	6.86	5.0481	2.2007	-0.3469	-0.1806	-0.9133	-0.748	1.0136	88.6886	4.614	0	2.3026	9.2103	4.6052
S025WTS050	Codilean et al. 2022	1438.84		6.3392	5.5371	0.63791	0.811	0.9888	4.8686	5.6435	5.7882	123.257	171.394	223.431	5.365	5.5988	5.6224	0.3944	0.5828	0.6969	7.49	4.5685	4.1137	-0.3085	51.699	40.9561	0.7264	-2.3455	0.4355	0.2838	1.4797	6.8705	7.094	1.2502	2.4524	6.0171	4.5538	0.2713	-0.7113	-0.7127	-1.1638	-1.1651	1.2158	3.3002	5.965	0	4.7171	9.7654	4.7376
S082WTS034	Codilean et al. 2022	22890.4		3.5723	5.3639	0.2108	0.4614	0.5926	3.9429	5.1283	5.2929	46.2752	79.181	106.742	4.9073	5.2342	5.2596	0.1493	0.3025	0.3888	6.4592	4.2174	3.729	-1.6289	0	0	0.2624	-2.0667	0.1579	0.2725	1.423	5.6536	6.3519	0.3927	1.5856	5.5136	3.9175	-2.0954	-0.6951	-0.656	-1.1963	-1.1555	1.0169	10.9658	10.733	4.4196	2.9544	9.2103	4.7265
S075WTS013	Codilean et al. 2022	2306.34		5.8674	4.2846	0.44117	0.6593	0.7709	4.1076	5.1357	5.1931	70.9823	100.81	124.174	5.1556	5.4137	5.5367	0.2992	0.4482	0.5147	7.0329	4.9858	3.833	0.8615	93.051	43.0759	1.1859	-3.2623	0.518	0.2142	1.2627	7.6827	7.7397	2.3784	2.8515	7.6357	5.598	1.932	-0.7091	-0.7294	-1.2511	-1.2676	0.927	98.3313	2.118	0.2581	7.0297	9.2103	5.9512
S151WTS009	Codilean et al. 2022	4759.93		5.1428	5.378	0.28517	0.5613	0.7425	3.5797	4.9318	5.0427	43.2628	76.1583	99.8581	4.6928	5.0682	5.5887	0.1593	0.3124	0.4313	8.5765	5.6249	4.7619	0.6387	72.077	76.5443	1.5148	-2.5498	0.6641	0.3214	1.3903	7.8439	7.7541	3.0054	3.7574	7.6553	5.8879	2.1554	-0.0622	0.0788	-0.5349	-0.4125	1.9905	0	8.641	3.4274	2.3026	9.2103	4.6052
S115WTS007	Codilean et al. 2022	10265.8		4.3742	1.8563	0.30801	0.4496	0.535	4.0573	5.0848	5.1078	55.3526	73.5863	84.5776	4.8347	5.0335	5.1424	0.2103	0.3016	0.3387	5.8946	5.0118	4.2907	-0.1716	92.21	94.3803	1.2379	-3.6929	0.5838	0.2675	1.336	6.9322	7.308	0.3887	1.4706	6.2813	4.7516	0.9458	-0.3893	-0.3962	-0.9096	-0.913	1.2417	99.9996	2	0	4.3733	9.2103	5.4013
S023WTS034	Codilean et al. 2022	23647.7		3.5398	5.0213	0.06847	0.1204	0.2566	2.9373	4.7148	4.7359	12.067	16.2143	31.921	2.6499	2.7778	2.8778	0.042	0.0622	0.134	5.6043	3.9792	3.4423	-1.3473	0	0	0.2819	-2.2137	0.1642	0.1556	1.0759	5.9612	5.9237	-2.4651	-1.1178	4.6951	2.5852	-2.2315	-1.5535	-1.372	-1.9914	-1.8872	0.5246	0	5.338	1.3912	3.3868	9.2103	5.2199
S022WTS010	Codilean et al. 2022	7295.43		4.7158	5.5766	0.25284	0.3482	0.4213	3.3509	4.8607	4.9175	29.4705	42.1215	52.7134	4.3468	4.748	4.837	0.1147	0.1769	0.2119	8.7104	5.2013	4.6702	0.6576	96.338	100	1.3527	-2.7855	0.5859	0.2952	1.4753	8.017	7.9854	2.7432	3.3528	7.2761	5.363	2.1643	-0.1254	0.0185	-0.6913	-0.5365	1.0402	99.9999	2.197	0	2.3026	9.2103	4.6052
S125WTS001	Codilean et al. 2022	2831.58		5.6622	5.0684	0.49712	0.7192	0.8012	4.7969	5.4692	5.5761	99.6358	131.048	159.762	5.4282	5.657	5.7345	0.373	0.5211	0.6016	5.873	4.5819	3.7424	-0.7866	0	1.8022	0.0308	-1.3425	0.0552	0.2146	1.4775	6.1895	5.7823	1.3714	2.0708	6.3615	4.492	-2.2095	-0.2309	-0.2689	-0.7963	-0.8246	1.4549	14.1696	7.263	0	6.6581	10.5706	6.0997
S261WTS037	Codilean et al. 2022	12159.1		4.205	4.925	0.13129	0.2422	0.3673	3.4339	4.8772	4.9106	21.3336	34.141	43.0093	3.4068	3.6219	3.7039	0.0728	0.124	0.1888	5.5603	3.9388	3.2319	-1.1989	21.148	22.8171	0.3459	-2.3795	0.2816	0.1666	1.0874	6.1237	6.1602	-1.3744	-0.007	4.8848	3.0311	-1.6095	-1.2687	-1.0732	-1.7556	-1.6114	0.6304	0.0443	8.878	3.2679	4.1925	9.2103	5.4141
S261WTS036	Codilean et al. 2022	13311		4.1145	4.925	0.13129	0.2422	0.3673	3.4339	4.8772	4.9106	21.3336	34.141	43.0093	3.4068	3.6219	3.7039	0.0728	0.124	0.1888	5.5603	3.9388	3.2319	-1.1989	21.148	22.8171	0.3459	-2.3795	0.2816	0.1666	1.0874	6.1237	6.1602	-1.3744	-0.007	4.8848	3.0311	-1.6095	-1.2687	-1.0732	-1.7556	-1.6114	0.6304	0.0443	8.878	3.2679	4.1925	9.2103	5.4141
S264WTS006	Codilean et al. 2022	13003		4.1379	4.9411	0.25677	0.4642	0.5553	3.435	4.8993	4.9702	33.7267	49.2742	63.3623	4.0588	4.4631	4.5177	0.1315	0.2019	0.2602	7.7105	5.0636	4.3653	0.1985	80.483	98.51	1.2566	-3.4546	0.6205	0.2772	1.595	7.1833	7.0943	1.5072	2.2752	6.5401	4.745	1.1403	-1.1718	-1.1725	-1.5995	-1.6	0.3674	75.2492	3.238	0	4.0027	9.2103	5.1823
S149WTS004	Codilean et al. 2022	41789.7		2.9704	5.5681	0.18368	0.3762	0.5143	3.5372	5.0218	5.1276	35.8924	67.6611	86.2295	4.4235	4.9429	5.2628	0.1095	0.2308	0.307	8.5235	5.2151	4.6428	0.4694	27.096	71.5561	0.9645	-2.2155	0.573	0.3096	1.4948	7.8475	7.6792	2.3209	3.1019	6.8948	5.1311	1.7246	-0.587	-0.4499	-1.1239	-0.9932	1.0417	97.2784	3.245	1.3142	2.3026	9.2103	4.6052
S149WTS016	Codilean et al. 2022	4151.51		5.2796	5.5549	0.33126	0.54	0.6689	4.2049	5.2471	5.3063	61.7084	92.8092	114.417	5.1374	5.6559	5.9027	0.2088	0.3231	0.3808	8.3532	5.405	4.6106	0.9333	89.987	98.0541	1.6219	-2.7211	0.6495	0.2967	1.4632	8.1566	7.9171	2.6655	3.188	7.2185	5.2214	2.4817	0.0761	0.0933	-0.4793	-0.4331	1.4684	97.9101	4.161	1.1281	2.3026	9.2103	4.6052
S093WTS007	Codilean et al. 2022	9517.64		4.4499	4.8804	0.17981	0.2984	0.4058	3.4991	4.932	5.0003	26.3396	38.9896	54.7798	4.0393	4.6171	4.8835	0.095	0.1606	0.2041	7.7295	4.9515	4.2392	0.3973	93.032	94.3628	1.3621	-3.2214	0.6409	0.294	1.4979	7.2469	7.1806	1.64	1.9984	6.6856	4.5264	1.4191	-0.0008	0.2285	-0.4129	-0.2605	1.1615	100	2	0	4.0362	9.2103	4.9676
S108WTS007	Codilean et al. 2022	3450.04		5.4647	5.2343	0.39019	0.5914	0.7414	4.5967	5.4544	5.9973	74.2262	93.9574	130.648	5.6683	5.9605	6.9006	0.2687	0.3946	0.4683	6.0885	5.058	4.4053	0.0174	83.137	72.6676	1.2788	-3.2995	0.5619	0.2677	1.344	7.1336	7.4087	1.4699	2.5991	6.3563	4.8763	1.1191	-0.359	-0.3337	-0.8843	-0.8646	1.243	62.7445	3.03	0.6218	4.5209	9.2103	5.1964
S271WTS027	Codilean et al. 2022	24679		3.4971	5.4723	0.36325	0.6198	0.7409	4.3093	5.2499	5.3241	67.6244	99.3443	126.998	5.4232	5.7997	6.0569	0.2307	0.3581	0.4361	7.4909	4.8915	4.3093	0.2466	93.545	96.0396	1.4666	-2.7458	0.6736	0.2605	1.3341	7.5646	7.8809	2.7336	3.5068	7.3368	5.5821	1.99	-0.0797	-0.0983	-0.616	-0.6368	1.3884	15.28	8.292	3.7406	2.3026	9.2103	4.6052
S127WTS034	Codilean et al. 2022	72242.9		2.423	5.4181	0.22886	0.4187	0.5442	3.8433	5.0959	5.1789	40.506	62.2594	84.0443	4.031	4.4277	4.6286	0.1399	0.2351	0.2897	6.315	4.354	3.8752	-0.7591	4.455	0.1827	0.4617	-2.1447	0.2754	0.2357	1.3767	6.5666	6.6157	-0.0212	1.0966	5.2676	3.5194	-0.8998	-0.7016	-0.6514	-1.3367	-1.2794	1.0669	0	7.14	0	2.3026	9.2103	4.6052
S105WTS003	Codilean et al. 2022	1888.18		6.0675	4.8221	0.5332	0.7634	0.8803	4.5942	5.3525	5.455	85.8257	115.349	144.983	4.3254	4.5906	4.6368	0.3248	0.4823	0.5478	5.9982	4.0345	3.3428	-0.5462	7.536	20.8675	0.2711	-2.0062	0.1904	0.2088	1.3303	6.3008	6.3422	-1.1363	0.157	4.9682	3.1532	-1.1936	-0.6722	-0.244	-1.1187	-0.9519	1.2078	21.4588	7.56	0	4.6702	10.4718	5.916
S193WTS001	Codilean et al. 2022	635.831		7.1559	5.1007	0.62545	0.7667	0.9362	4.5753	5.3756	5.6357	97.9377	136.367	171.82	5.5031	5.9751	6.1351	0.3466	0.5333	0.6412	6.6184	4.8537	4.2702	0.2733	87.734	53.5543	0.8082	-3.3962	0.5327	0.3248	1.4736	6.8586	7.3048	1.3545	2.3081	6.3311	4.6874	1.149	-0.4265	0.2007	-0.9613	-0.7125	0.8951	20.285	6.785	2.6698	4.2875	9.2103	5.3919
S165WTS008	Codilean et al. 2022	1407.45		6.3613	4.4821	0.26678	0.4497	0.5548	3.6186	4.9	4.922	38.1714	52.6547	66.2105	4.1355	4.3625	4.3996	0.1542	0.2292	0.2708	7.0456	4.5448	3.7937	0.1752	62.427	64.4153	1.1314	-2.6766	0.6071	0.2521	1.4397	7.1666	6.9203	0.9693	1.483	6.2912	4.2552	0.9384	-0.323	-0.2143	-0.8221	-0.7453	1.2878	0	11.292	4.4642	2.3026	9.2103	4.6052
S063WTS008	Codilean et al. 2022	1397.22		6.3686	4.4772	0.28536	0.4497	0.5548	3.6203	4.9001	4.9221	38.1991	52.7141	66.2382	4.1358	4.3627	4.3996	0.1542	0.2293	0.2708	7.0456	4.5448	3.7937	0.171	62.125	63.9767	1.1311	-2.6708	0.6068	0.2522	1.4397	7.1627	6.9203	0.9693	1.483	6.2931	4.2572	0.9344	-0.3228	-0.2141	-0.8221	-0.7451	1.2878	0	11.285	4.4624	2.3026	9.2103	4.6052
[truncated: 618 more rows]
[truncated: 3 more columns]

## Sheet: Table S10
Table S10. Denudation rate and candidate covariates for the dataset without basins with a lot of solid precipitation or glacial volume.
[truncated: 1,399 more rows]

[truncated: 6 more sheets: Table S11, Table S12, Table S13, Table S14, Table S15, Table S16]
